# Supplementary material for: Multi-ancestry genome-wide association analyses improve resolution of genes and pathways influencing lung function and chronic obstructive pulmonary disease risk
Source: Nat Genet. 2023 Mar 13;55(3):410–22. doi: 10.1038/s41588-023-01314-0 (PMC10011137; doi:10.1038/s41588-023-01314-0)
Supplement: Supplementary file 4 — Supplementary Tables 1, 5–8, 10, 13–15, 17–19 and 24–33. [file 41588_2023_1314_MOESM4_ESM.xlsx]

## Sheet: Supp Table 1
Supplementary Table 1 - Sample size in all cohorts
SUPER_COHORT_x000D_ N=33	COHORT_x000D_ N=49	ANCESTRY	N TOTAL	N MALES	N FEMALES	N SMOKERS	N NON-SMOKERS	GROUP				N studies	N samples	% samples
ALHS	ALHS	EUR	2848	1447	1401	964	1884	CHARGE			EUR	38	475645	0.808299
ALSPAC	ALSPAC	EUR	4857	2444	2413			New-SpiroMeta			EAS	2	85279	0.144921
ARIC	ARIC-EA	EUR	9275	4376	4899	5575	3700	CHARGE			AMR	3	14668	0.0249264
B58C	B58C	EUR	5788	2862	2926	4125	1663	New-SpiroMeta			SAS	1	4270	0.00725633
BHS	BHS	EUR	4272	1884	2388	1858	2414	New-SpiroMeta			AFR	4	8590	0.0145976
CHS	CHS-EA	EUR	3220	1259	1961	1679	1541	CHARGE			Total	48	588452
Croatia	Croatia-Korcula	EUR	2520	929	1591	1231	1289	New-SpiroMeta
Croatia	Croatia-Split	EUR	961	379	582	516	445	New-SpiroMeta			UKB	5	333515	0.566767
Croatia	Croatia-Vis	EUR	925	390	535	537	388	New-SpiroMeta			CHARGE	14	49334	0.0838369
EPIC-Norfolk	EPIC-Norfolk	EUR	20771	9664	11107	11239	9532	2019
EXCEED	EXCEED	EUR	1334	818	516	688	646	New-SpiroMeta
FinnTwin	FinnTwin	EUR	539	91	448	161	378	New-SpiroMeta
FHS	FHS	EUR	7905	3656	4249	4351	3546	CHARGE
GS	GS	EUR	16048	6633	10415	7467	8581	2019
H2000	H2000	EUR	3808	1655	2153	1728	2080	New-SpiroMeta
HUNT	HUNT	EUR	16485	7648	8837	10489	5996	New-SpiroMeta
KORA	KORA-F4	EUR	1474	717	757	918	556	2019 (1KG)
KORA	KORA-S3	EUR	1147	551	596	627	520	2019 (1KG)
LBC1936	LBC1936	EUR	1002	509	493	536	493	New-SpiroMeta
MESA	MESA-CAU	EUR	1397	707	690	798	599	CHARGE
NEO	NEO	EUR	4642			2675	1877	CHARGE
NFBC	NFBC1966	EUR	5078	2417	2661	2600	2478	2019
NFBC	NFBC1986	EUR	3210	1516	1694	734	2476	2019
SAPALDIA	SAPALDIA-Edinburgh	EUR	2584	1338	1246	1442	1142	New-SpiroMeta
SAPALDIA	SAPALDIA-Gabriel	EUR	1355	656	699	773	582	New-SpiroMeta
Orcades	Orcades	EUR	1821	730	1091	705	1116	New-SpiroMeta
PIVUS	PIVUS	EUR	806	395	411	413	393	2019
Raine Study	Raine Study	EUR	1213	637	576	31	1182	New-SpiroMeta
Rotterdam	RS1	EUR	1240	526	714	829	411	CHARGE
Rotterdam	RS2	EUR	1143	532	611	761	382	CHARGE
Rotterdam	RS3	EUR	1431	624	807	957	474	CHARGE
SHIP	SHIP-START	EUR	1759	860	899	941	818	New-SpiroMeta
SHIP	SHIP-TREND	EUR	2519	1265	1254	1554	965	New-SpiroMeta
TwinsUK	TwinsUK	EUR	4227	380	3847	2419	1806	New-SpiroMeta
UKB	UKB-EUR	EUR	320656	142403	178253	147215	173441	New-UKB
UKHLS	UKHLS	EUR	7442	3290	4152	4504	2938	2019
VIKING	VIKING	EUR	1701	672	1029	757	943	2019
YFS	YFS	EUR	419	198	221	186	233	2019 (1KG)
QBB	QBB	EUR*	5823	2541	3254	1763	4022	New
ARIC	ARIC-AA	AFR	2820	1044	1776	5575	3700	CHARGE
CHS	CHS-AA	AFR	635	238	397	363	272	CHARGE
MESA	MESA-AFR	AFR	908	439	469	503	405	CHARGE
UKB	UKB-AFR	AFR	4227	1711	2516	1181	3046	New-UKB
HCHS	HCHS-SOL	AMR	10965	4558	6407	4317	6648	CHARGE
MESA	MESA-HIS	AMR	905	427	478	418	487	CHARGE
UKB	UKB-AMR	AMR	2798	1350	1448	1298	1500	New-UKB
CKB	CKB	EAS	83715	36399	47316	34686	49029	New
UKB	UKB-EAS	EAS	1564	520	1044	380	1184	New-UKB
UKB	UKB-SAS	SAS	4270	2263	2007	998	3272	New-UKB
*Middle-Eastern Arabian

## Sheet: Supp Table 5
Supplementary Table 5 - LD score regression intercepts in each study
Cohort	FEV1	FVC	FEV1/FVC	PEF
ALHS	1.0138	1.0104	1.026
ALSPAC	0.9985	0.9969	1.001	0.994
ARIC_AA	1.0207	1.0169	1.0147	1.0133
ARIC_EA	1.0084	1.0131	1.0193
B58C	0.995	0.9995	0.9967	0.9983
BHS	1.1435	1.1458	1.0941
CHSAA	1.0103	1.0098	1.0041
CHSEA	1.0055	0.9987	1.0038
CKB	1.0381	1.0468	1.0352
EPIC-Norfolk	1.014	1.0222	1.0031	1.0188
EXCEED	0.9928	0.9882	1.0082
FHS	1.0079	1.0032	1.0169
FinnTwin	1.0007	0.9918	1.0048	0.9941
GS20K	1.053	1.059	1.0174
H2000	1.0098	1.0073	1.0018
HCHS	1.0218	1.0172	1.0123
HUNT	1.0411	1.0752	1.0578	1.0244
KORA_F4	0.9966	0.99	0.9974
KORA_S3	0.9858	0.9906	0.997
Korcula	1.0061	1.023	0.985
LBC1936	1.0017	0.9995	1.0077	1.0068
MESA_AFA	0.9991	1.0056	1.0092
MESA_CAU	1.0038	1.0068	1.0012
MESA_HIS	0.9968	1.0012	0.9869
NEO	1.0031	1.0114	0.9854
NFBC66	1.0351	1.0507	1.0245
NFBC86	1.0068	0.9979	1.0186
orcades	0.9822	0.9988	0.9785	0.9935
PIVUS	1.0083	0.9974	1.0152
QBB	1.0251	1.0173	1.0129
Raine Study	1.006	0.9977	0.9951	1.0046
RS1	1.0147	1.0236	1.0134	1.0116
RS2	1.0146	1.026	1.0126	1.0198
RS3	1.0198	1.0167	1.0303	1.0136
SAPALDIA_Edinburgh	0.9963	1.0096	1.0136
SAPALDIA_Gabriel	1.0006	0.9973	0.9974
SHIP-1	0.9969	0.9895	1.0079	0.9922
SHIP-TREND-0	1.0016	1.0112	1.0061	0.9998
SHIP-TREND-0_B2	0.9863	0.9893	0.9994	1.0004
Split	1.0064	1.0027	0.9883	1.0009
Twins_UK	1.0004	1.0161	1.0057
UKB_AFR	1.1587	1.1723	1.0347	1.1047
UKB_AMR	1.0216	1.0303	1.0168	1.0088
UKB_EAS	1.347	1.4256	1.0237	1.1619
UKB_EUR	1.1277	1.1487	1.1911	1.1394
UKB_SAS	1.0281	1.0285	1.0208	1.0149
UKHLS	1.0019	0.9926	1.0024
VIKING	1.0029	1.0153	1.0125	0.9929
Vis	1.0093	1.013	0.9878
YFS	0.996	0.9851	1.0052

## Sheet: Supp Table 6
Supplementary Table 6 - Signals selected in transformed meta-analysis
																		UKB frequencies					Untransformed meta-analysis results across all traits																				Variant-to-gene mapping
nearest_gene	rsid	Previously reported	Reported rsid	PMID/DOI	sentinel	chr	pos	trait	other_traits	effect	other	eaf	MAF	Zscore/cZscore	P/cP	Direction	Studies	eaf_EUR	eaf_AFR	eaf_EAS	eaf_AMR	eaf_SAS	N_FEV1	N_FVC	N_RATIO	N_PEF	eaf_FEV1	eaf_FVC	eaf_RATIO	eaf_PEF	beta_FEV1	beta_FVC	beta_RATIO	beta_PEF	se_FEV1	se_FVC	se_RATIO	se_PEF	P_FEV1	P_FVC	P_RATIO	P_PEF	evidence
MRPL20	rs1240709	FALSE			1_1337837_A_G	1	1337837	PEF		A	G	0.794	0.206	-6.502	7.92e-11	?-???+??????????+-+--?	ALSPAC ARIC_AA B58C EPIC FinnTwin hunt LBC1936 orcades Raine RS1 RS2 RS3 SHIP-1 SHIP-TREND-0 SHIP-TREND-0_B2 Split UKB_AFR UKB_AMR UKB_EAS UKB_EUR UKB_SAS VIKING	0.817625	0.080073	0.019401	0.816689	0.368504	452972	452972	452972	365467	0.7372	0.7326	0.7731	0.7853	-0.0053	-0.0052	-0.0002	-0.03	0.0015	0.0017	0.0002	0.0044	0.0003372	0.002915	0.2866	1.462e-11	ACAP3(eQTL), AGRN(rare_disease), CALML6(eQTL), CPSF3L(eQTL), DVL1(PoPs), GNB1(eQTL), LOC100129534(eQTL), MRPL20(nearest), TMEM240(mouse_KO), TNFRSF4(rare_disease)
GNB1	rs6676565	FALSE			1_1822209_C_T	1	1822209	FVC	FEV1,FVC	T	C	0.25	0.25	6.47	9.78e-11	???????+?????++????-?-????????????????--++-????	ALHS ALSPAC ARIC_EA B58C BHS CHSAA CHSEA CKB EPIC EXCEED FHS FinnTwin GS20K HCHS hunt KORA_F4 KORA_S3 Korcula LBC1936 MESA_AFA_new MESA_CAU_new MESA_HIS_new NEO NFBC66 NFBC86 orcades PIVUS Raine RS1 RS2 RS3 SAPALDIA_Edinburgh SAPALDIA_Gabriel SHIP-1 SHIP-TREND-0 SHIP-TREND-0_B2 Split Twins_UK UKB_AFR UKB_AMR UKB_EAS UKB_EUR UKB_SAS UKHLS VIKING Vis YFS	0.264401	0.232185	0.151548	0.235179	0.148652	449182	449182	449182	365467	0.2449	0.2435	0.2571	0.2621	0.0078	0.0094	0.0001	0.016	0.0012	0.0014	0.0002	0.004	2.089e-10	6.608e-11	0.3969	5.35e-05	GNB1(PoPs,nearest), CALML6(eQTL), CDK11A(eQTL), CDK11B(eQTL), GABRD(eQTL), MMP23A(eQTL), NADK(eQTL), RP1-140A9.1(eQTL), RP1-283E3.4(eQTL), RP1-283E3.8(eQTL), RP4-758J18.10(eQTL), SLC35E2(eQTL), TMEM52(eQTL)
SKI	rs28384811	FALSE			1_2160390_C_G	1	2160390	FEV1	FEV1,FVC	C	G	0.938	0.062	7.406	1.3e-13	--?++-+-++++++?++-++++-+++++++-+++++-+-++--+++++-+	ALHS ALSPAC ARIC_AA ARIC_EA B58C BHS CHSAA CHSEA CKB EPIC EXCEED FHS FinnTwin GS20K H2000 HCHS hunt KORA_F4 KORA_S3 Korcula LBC1936 MESA_AFA_new MESA_CAU_new MESA_HIS_new NEO NFBC66 NFBC86 orcades PIVUS QBB Raine RS1 RS2 RS3 SAPALDIA_Edinburgh SAPALDIA_Gabriel SHIP-1 SHIP-TREND-0 SHIP-TREND-0_B2 Split Twins_UK UKB_AFR UKB_AMR UKB_EAS UKB_EUR UKB_SAS UKHLS VIKING Vis YFS	0.927749	0.968899	0.991889	0.90103	0.928309	575251	575249	570581	418225	0.9285	0.9292	0.9282	0.929	0.0145	0.017	0.0005	0.025	0.002	0.0023	0.0003	0.006	1.244e-13	1.957e-13	0.07754	3.017e-05	SKI(PoPs,nearest), AL590822.2(eQTL), C1orf86(eQTL), PEX10(rare_disease)
MEGF6	rs947350	TRUE	rs2794359	31911640	1_3431555_C_T	1	3431555	FEV1/FVC		T	C	0.103	0.103	10.079	6.81e-24	++++-++++-++++-+++-+-+-+++++-+++++++++---++-+++--+	ALHS ALSPAC ARIC_AA ARIC_EA B58C BHS CHSAA CHSEA CKB EPIC EXCEED FHS FinnTwin GS20K H2000 HCHS hunt KORA_F4 KORA_S3 Korcula LBC1936 MESA_AFA_new MESA_CAU_new MESA_HIS_new NEO NFBC66 NFBC86 orcades PIVUS QBB Raine RS1 RS2 RS3 SAPALDIA_Edinburgh SAPALDIA_Gabriel SHIP-1 SHIP-TREND-0 SHIP-TREND-0_B2 Split Twins_UK UKB_AFR UKB_AMR UKB_EAS UKB_EUR UKB_SAS UKHLS VIKING Vis YFS	0.104825	0.0101565	0.14443	0.0370222	0.0768164	580637	580635	575967	421045	0.1055	0.1057	0.105	0.1037	0.002	-0.0057	0.002	0.0146	0.0015	0.0018	0.0002	0.0051	0.1761	0.001123	1.49e-20	0.003927	MEGF6(WES,nearest), CEP104(rare_disease), FAM213B(eQTL), MMEL1(eQTL), PRDM16(PoPs), RP3-395M20.12(eQTL), RP3-395M20.7(eQTL), RP3-395M20.8(eQTL), TNFRSF14(eQTL), TTC34(eQTL)
PHF13	rs9661802	TRUE	rs9661802	30804560	1_6678864_A_C	1	6678864	FEV1/FVC	PEF,FEV1,FF	A	C	0.649	0.351	10.49	9.62e-26	+++++++++++--+++++-++-++++-+-++--++-+++-++++++-+++	ALHS ALSPAC ARIC_AA ARIC_EA B58C BHS CHSAA CHSEA CKB EPIC EXCEED FHS FinnTwin GS20K H2000 HCHS hunt KORA_F4 KORA_S3 Korcula LBC1936 MESA_AFA_new MESA_CAU_new MESA_HIS_new NEO NFBC66 NFBC86 orcades PIVUS QBB Raine RS1 RS2 RS3 SAPALDIA_Edinburgh SAPALDIA_Gabriel SHIP-1 SHIP-TREND-0 SHIP-TREND-0_B2 Split Twins_UK UKB_AFR UKB_AMR UKB_EAS UKB_EUR UKB_SAS UKHLS VIKING Vis YFS	0.662644	0.646363	0.596764	0.597393	0.536244	581876	581874	577206	421045	0.642	0.6416	0.6544	0.6641	0.0057	0.0017	0.0014	0.0235	0.0009	0.0011	0.0001	0.0032	1.639e-09	0.1319	1.775e-23	3.257e-13	PHF13(WES,nearest), THAP3(eQTL,PoPs), RP11-58A11.2(eQTL)
PARK7	1:8022772_CAG_C	FALSE			1_8022772_C_CAG	1	8022772	FVC		CAG	C	0.842	0.158	6.554	5.6e-11	??+?????+?????+-+????-?+????????????????++-++????	ALHS ALSPAC ARIC_AA ARIC_EA B58C BHS CHSAA CHSEA CKB EPIC EXCEED FHS FinnTwin GS20K H2000 HCHS hunt KORA_F4 KORA_S3 Korcula LBC1936 MESA_AFA_new MESA_CAU_new MESA_HIS_new NEO NFBC66 NFBC86 orcades PIVUS Raine RS1 RS2 RS3 SAPALDIA_Edinburgh SAPALDIA_Gabriel SHIP-1 SHIP-TREND-0 SHIP-TREND-0_B2 Split Twins_UK UKB_AFR UKB_AMR UKB_EAS UKB_EUR UKB_SAS UKHLS VIKING Vis YFS	0.828843	0.732743	0.940373	0.908156	0.897555	464518	464518	464518	365467	0.8398	0.8404	0.8304	0.8282	0.0064	0.011	-0.0006	0.0065	0.0015	0.0017	0.0002	0.0046	1.045e-05	1.494e-10	0.001329	0.1566	PARK7(eQTL,nearest), CAMTA1(PoPs), TNFRSF9(eQTL)
SPSB1	rs12758001	FALSE			1_9437151_C_G	1	9437151	FVC	FEV1,FVC	C	G	0.578	0.422	-7.413	1.24e-13	-----+------+-+----+-+--------+-+--+--+--------+++	ALHS ALSPAC ARIC_AA ARIC_EA B58C BHS CHSAA CHSEA CKB EPIC EXCEED FHS FinnTwin GS20K H2000 HCHS hunt KORA_F4 KORA_S3 Korcula LBC1936 MESA_AFA_new MESA_CAU_new MESA_HIS_new NEO NFBC66 NFBC86 orcades PIVUS QBB Raine RS1 RS2 RS3 SAPALDIA_Edinburgh SAPALDIA_Gabriel SHIP-1 SHIP-TREND-0 SHIP-TREND-0_B2 Split Twins_UK UKB_AFR UKB_AMR UKB_EAS UKB_EUR UKB_SAS UKHLS VIKING Vis YFS	0.575991	0.912919	0.551023	0.623523	0.512575	581861	581859	577191	421045	0.5741	0.5736	0.5763	0.5843	-0.005	-0.0074	0.0002	-0.0044	0.0009	0.0011	0.0001	0.0031	5.421e-08	6.924e-12	0.2457	0.1557	SPSB1(PoPs,nearest), PIK3CD(rare_disease)
LOC100506022	rs72864356	TRUE	rs9660890	31911640	1_9494240_A_G	1	9494240	FEV1/FVC		A	G	0.101	0.101	8.088	6.08e-16	+--+-++++--++++++-+---++++-+++++++++-++-++-+++++-+	ALHS ALSPAC ARIC_AA ARIC_EA B58C BHS CHSAA CHSEA CKB EPIC EXCEED FHS FinnTwin GS20K H2000 HCHS hunt KORA_F4 KORA_S3 Korcula LBC1936 MESA_AFA_new MESA_CAU_new MESA_HIS_new NEO NFBC66 NFBC86 orcades PIVUS QBB Raine RS1 RS2 RS3 SAPALDIA_Edinburgh SAPALDIA_Gabriel SHIP-1 SHIP-TREND-0 SHIP-TREND-0_B2 Split Twins_UK UKB_AFR UKB_AMR UKB_EAS UKB_EUR UKB_SAS UKHLS VIKING Vis YFS	0.073147	0.345605	0.192083	0.0678496	0.125557	581889	581887	577219	421045	0.1336	0.1366	0.1127	0.0879	0.003	-0.0022	0.0016	0.0207	0.0015	0.0017	0.0002	0.0057	0.04131	0.1963	1.198e-12	0.0002672	KIF1B(eQTL), LOC100506022(nearest), PGD(eQTL), PIK3CD(rare_disease), SPSB1(PoPs)
KIF1B	rs6541092	FALSE			1_10441978_C_T	1	10441978	PEF		T	C	0.883	0.117	6.389	1.67e-10	????????????????-+-++?	ALSPAC ARIC_AA B58C EPIC FinnTwin hunt LBC1936 orcades Raine RS1 RS2 RS3 SHIP-1 SHIP-TREND-0 SHIP-TREND-0_B2 Split UKB_AFR UKB_AMR UKB_EAS UKB_EUR UKB_SAS VIKING	0.886169	0.69329	0.988766	0.833637	0.822265	345061	345061	345061	333515	0.8785	0.8779	0.8792	0.8807	0.0081	0.007	0.0007	0.0361	0.002	0.0023	0.0002	0.0057	3.313e-05	0.002443	0.007752	2.09e-10	KIF1B(eQTL,PoPs,nearest), PEX14(rare_disease)
CASZ1	rs10157038	FALSE			1_10712465_C_T	1	10712465	FEV1		T	C	0.0418	0.0418	-6.276	3.48e-10	------+---+---------++----++----++++--+--+------++	ALHS ALSPAC ARIC_AA ARIC_EA B58C BHS CHSAA CHSEA CKB EPIC EXCEED FHS FinnTwin GS20K H2000 HCHS hunt KORA_F4 KORA_S3 Korcula LBC1936 MESA_AFA_new MESA_CAU_new MESA_HIS_new NEO NFBC66 NFBC86 orcades PIVUS QBB Raine RS1 RS2 RS3 SAPALDIA_Edinburgh SAPALDIA_Gabriel SHIP-1 SHIP-TREND-0 SHIP-TREND-0_B2 Split Twins_UK UKB_AFR UKB_AMR UKB_EAS UKB_EUR UKB_SAS UKHLS VIKING Vis YFS	0.0383032	0.22856	0.076018	0.024924	0.111247	581889	581887	577219	421045	0.0517	0.0519	0.0519	0.0498	-0.0135	-0.0127	-0.0011	-0.0288	0.0023	0.0027	0.0003	0.0077	4.191e-09	2.165e-06	0.0009832	0.0001991	CASZ1(PoPs,nearest), MASP2(rare_disease), PEX14(rare_disease)
MFAP2	rs9435731	TRUE	rs2284746	21946350	1_17306029_A_C	1	17306029	FEV1/FVC	PEF,FVC,FF	A	C	0.475	0.475	-17.774	1.13e-70	----------+--------+++--------+-----+-------------	ALHS ALSPAC ARIC_AA ARIC_EA B58C BHS CHSAA CHSEA CKB EPIC EXCEED FHS FinnTwin GS20K H2000 HCHS hunt KORA_F4 KORA_S3 Korcula LBC1936 MESA_AFA_new MESA_CAU_new MESA_HIS_new NEO NFBC66 NFBC86 orcades PIVUS QBB Raine RS1 RS2 RS3 SAPALDIA_Edinburgh SAPALDIA_Gabriel SHIP-1 SHIP-TREND-0 SHIP-TREND-0_B2 Split Twins_UK UKB_AFR UKB_AMR UKB_EAS UKB_EUR UKB_SAS UKHLS VIKING Vis YFS	0.519614	0.138633	0.262468	0.466226	0.454684	581873	581871	577203	421045	0.4722	0.4698	0.4991	0.5089	0.0007	0.0109	-0.0023	-0.0303	0.0009	0.0011	0.0001	0.0031	0.4607	5.5e-24	6.284e-64	4.371e-23	MFAP2(PoPs,nearest), MST1L(eQTL), MST1P2(eQTL), RP1-37C10.3(eQTL)
CAPZB	rs4912092	FALSE			1_19754466_C_G	1	19754466	PEF	PEF,FEV1,FF	C	G	0.758	0.242	10.731	7.3e-27	+--++++++-++++-+--+++-	ALSPAC ARIC_AA B58C EPIC FinnTwin hunt LBC1936 orcades Raine RS1 RS2 RS3 SHIP-1 SHIP-TREND-0 SHIP-TREND-0_B2 Split UKB_AFR UKB_AMR UKB_EAS UKB_EUR UKB_SAS VIKING	0.755229	0.873262	0.860912	0.799046	0.686096	581888	581886	577218	421045	0.7718	0.7732	0.7631	0.7501	0.0074	0.0045	0.001	0.0376	0.0011	0.0013	0.0002	0.0036	1.225e-11	0.0003927	5.818e-11	9.227e-26	CAPZB(PoPs,nearest)
WNT4	rs7519889	FALSE			1_22472506_A_G	1	22472506	FVC		A	G	0.3	0.3	8.338	7.56e-17	+-+++---++-+++?+++++----+-+-+---+-+-+-++++++++++-+	ALHS ALSPAC ARIC_AA ARIC_EA B58C BHS CHSAA CHSEA CKB EPIC EXCEED FHS FinnTwin GS20K H2000 HCHS hunt KORA_F4 KORA_S3 Korcula LBC1936 MESA_AFA_new MESA_CAU_new MESA_HIS_new NEO NFBC66 NFBC86 orcades PIVUS QBB Raine RS1 RS2 RS3 SAPALDIA_Edinburgh SAPALDIA_Gabriel SHIP-1 SHIP-TREND-0 SHIP-TREND-0_B2 Split Twins_UK UKB_AFR UKB_AMR UKB_EAS UKB_EUR UKB_SAS UKHLS VIKING Vis YFS	0.205404	0.215403	0.769974	0.199619	0.309734	578079	578077	573409	421045	0.3119	0.3171	0.2474	0.2128	0.0072	0.01	-0.0002	0.0031	0.0011	0.0013	0.0002	0.0038	1.591e-10	5.945e-14	0.2296	0.409	WNT4(rare_disease,nearest), C1QA(rare_disease), C1QC(rare_disease), HSPG2(PoPs)
WNT4	rs4655027	FALSE			1_22473791_C_T	1	22473791	FEV1	FEV1,FVC	T	C	0.524	0.476	-7.204	5.86e-13	-+-+---+--+----------------+-+--+-+-+--------+---	ALHS ALSPAC ARIC_AA ARIC_EA B58C BHS CHSAA CHSEA CKB EPIC EXCEED FHS FinnTwin GS20K H2000 HCHS hunt KORA_F4 KORA_S3 Korcula LBC1936 MESA_AFA_new MESA_CAU_new MESA_HIS_new NEO NFBC66 NFBC86 orcades PIVUS Raine RS1 RS2 RS3 SAPALDIA_Edinburgh SAPALDIA_Gabriel SHIP-1 SHIP-TREND-0 SHIP-TREND-0_B2 Split Twins_UK UKB_AFR UKB_AMR UKB_EAS UKB_EUR UKB_SAS UKHLS VIKING Vis YFS	0.576145	0.417518	0.218009	0.544003	0.57756	581888	581886	577218	421045	0.5245	0.5191	0.553	0.5631	-0.0059	-0.007	-0.0001	-0.0052	0.001	0.0011	0.0001	0.0031	6.406e-10	3.319e-10	0.4256	0.09056	WNT4(rare_disease,nearest), C1QA(rare_disease), C1QC(rare_disease), HSPG2(PoPs)
MIR4418	rs71638832	FALSE			1_22541278_C_T	1	22541278	FEV1/FVC		T	C	0.255	0.255	-6.396	1.59e-10	---+------+-+-+---++++--+----+-+-+--++-++-----+--+	ALHS ALSPAC ARIC_AA ARIC_EA B58C BHS CHSAA CHSEA CKB EPIC EXCEED FHS FinnTwin GS20K H2000 HCHS hunt KORA_F4 KORA_S3 Korcula LBC1936 MESA_AFA_new MESA_CAU_new MESA_HIS_new NEO NFBC66 NFBC86 orcades PIVUS QBB Raine RS1 RS2 RS3 SAPALDIA_Edinburgh SAPALDIA_Gabriel SHIP-1 SHIP-TREND-0 SHIP-TREND-0_B2 Split Twins_UK UKB_AFR UKB_AMR UKB_EAS UKB_EUR UKB_SAS UKHLS VIKING Vis YFS	0.273972	0.0301748	0.194464	0.223824	0.242358	581887	581885	577217	421045	0.2572	0.2553	0.2656	0.2676	-0.0023	0.0011	-0.001	-0.0158	0.0011	0.0012	0.0002	0.0035	0.03249	0.3912	1.234e-10	5.832e-06	WNT4(rare_disease,PoPs), C1QA(rare_disease), C1QB(rare_disease), C1QC(rare_disease), MIR4418(nearest)
MIR4418	rs35274107	TRUE	rs4233284	31911640	1_22657120_C_T	1	22657120	FEV1	FEV1,FVC	T	C	0.369	0.369	-7.794	6.47e-15	+-+-+-++------+----++---------+++----+++--+-----++	ALHS ALSPAC ARIC_AA ARIC_EA B58C BHS CHSAA CHSEA CKB EPIC EXCEED FHS FinnTwin GS20K H2000 HCHS hunt KORA_F4 KORA_S3 Korcula LBC1936 MESA_AFA_new MESA_CAU_new MESA_HIS_new NEO NFBC66 NFBC86 orcades PIVUS QBB Raine RS1 RS2 RS3 SAPALDIA_Edinburgh SAPALDIA_Gabriel SHIP-1 SHIP-TREND-0 SHIP-TREND-0_B2 Split Twins_UK UKB_AFR UKB_AMR UKB_EAS UKB_EUR UKB_SAS UKHLS VIKING Vis YFS	0.371162	0.257414	0.368063	0.39546	0.435512	581885	581883	577215	421045	0.3688	0.3689	0.3693	0.366	-0.0068	-0.0085	0	-0.0066	0.0009	0.0011	0.0001	0.0032	4.433e-13	8.869e-15	0.8053	0.03912	WNT4(rare_disease,PoPs), C1QA(rare_disease), C1QB(rare_disease), C1QC(rare_disease), MIR4418(nearest)
NCMAP	rs6702180	FALSE			1_24882805_A_G	1	24882805	PEF		A	G	0.776	0.224	-7.192	6.38e-13	-+------+-+---+--+----	ALSPAC ARIC_AA B58C EPIC FinnTwin hunt LBC1936 orcades Raine RS1 RS2 RS3 SHIP-1 SHIP-TREND-0 SHIP-TREND-0_B2 Split UKB_AFR UKB_AMR UKB_EAS UKB_EUR UKB_SAS VIKING	0.775644	0.815352	0.774685	0.791267	0.770985	578089	578087	573419	421045	0.7741	0.7733	0.7762	0.7802	-0.0042	-0.0042	-0.0003	-0.0261	0.0011	0.0013	0.0002	0.0037	0.0001115	0.0009798	0.1078	1.542e-12	NCMAP(eQTL,nearest), CLIC4(PoPs)
RUNX3	rs9438876	FALSE			1_25241116_A_G	1	25241116	FEV1/FVC		A	G	0.514	0.486	7.57	3.74e-14	++-++++++++-+-++-++----+++++-++---+++-++-++++--+-+	ALHS ALSPAC ARIC_AA ARIC_EA B58C BHS CHSAA CHSEA CKB EPIC EXCEED FHS FinnTwin GS20K H2000 HCHS hunt KORA_F4 KORA_S3 Korcula LBC1936 MESA_AFA_new MESA_CAU_new MESA_HIS_new NEO NFBC66 NFBC86 orcades PIVUS QBB Raine RS1 RS2 RS3 SAPALDIA_Edinburgh SAPALDIA_Gabriel SHIP-1 SHIP-TREND-0 SHIP-TREND-0_B2 Split Twins_UK UKB_AFR UKB_AMR UKB_EAS UKB_EUR UKB_SAS UKHLS VIKING Vis YFS	0.485331	0.395718	0.641165	0.430979	0.563062	581857	581855	577187	421045	0.5143	0.5171	0.4947	0.4892	0.0032	-0.0006	0.0011	0.0129	0.0009	0.0011	0.0001	0.0031	0.0006165	0.6119	3.36e-15	3.899e-05	CLIC4(PoPs), RUNX3(nearest)
FAM110D	rs2802340	FALSE			1_26477833_A_T	1	26477833	FEV1	PEF,FEV1	A	T	0.174	0.174	6.527	6.7e-11	++?+++?+?+-+++-?+??++?+?++-++--+++++--++???+?++-?	ALHS ALSPAC ARIC_AA ARIC_EA B58C BHS CHSAA CHSEA CKB EPIC EXCEED FHS FinnTwin GS20K H2000 HCHS hunt KORA_F4 KORA_S3 Korcula LBC1936 MESA_AFA_new MESA_CAU_new MESA_HIS_new NEO NFBC66 NFBC86 orcades PIVUS Raine RS1 RS2 RS3 SAPALDIA_Edinburgh SAPALDIA_Gabriel SHIP-1 SHIP-TREND-0 SHIP-TREND-0_B2 Split Twins_UK UKB_AFR UKB_AMR UKB_EAS UKB_EUR UKB_SAS UKHLS VIKING Vis YFS	0.173948	0.208041	0.018719	0.195057	0.0733467	557146	557144	552476	408267	0.1689	0.1682	0.1722	0.1721	0.0082	0.0086	0.0004	0.0221	0.0013	0.0016	0.0002	0.0041	8.75e-10	6.099e-08	0.01485	8.447e-08	SELENON(WES,rare_disease), FAM110D(nearest), SH3BGRL3(PoPs)
LIN28A	rs17261915	TRUE	rs12096239	30804560	1_26756856_C_T	1	26756856	FEV1	FEV1,FVC	T	C	0.766	0.234	7.697	1.39e-14	++++++++++-+++--+++++++++++--+-+-++++++-+++-++++++	ALHS ALSPAC ARIC_AA ARIC_EA B58C BHS CHSAA CHSEA CKB EPIC EXCEED FHS FinnTwin GS20K H2000 HCHS hunt KORA_F4 KORA_S3 Korcula LBC1936 MESA_AFA_new MESA_CAU_new MESA_HIS_new NEO NFBC66 NFBC86 orcades PIVUS QBB Raine RS1 RS2 RS3 SAPALDIA_Edinburgh SAPALDIA_Gabriel SHIP-1 SHIP-TREND-0 SHIP-TREND-0_B2 Split Twins_UK UKB_AFR UKB_AMR UKB_EAS UKB_EUR UKB_SAS UKHLS VIKING Vis YFS	0.746771	0.960374	0.871483	0.686204	0.711593	581889	581887	577219	421045	0.7603	0.7616	0.7497	0.746	0.0079	0.007	0.0007	0.0197	0.0011	0.0013	0.0002	0.0035	2.604e-13	3.944e-08	1.444e-05	2.012e-08	HMGN2(eQTL), LIN28A(nearest), RP3-476K8.3(eQTL), SH3BGRL3(PoPs), TRNP1(eQTL)
LAPTM5	rs10914204	FALSE			1_31257670_C_G	1	31257670	PEF		C	G	0.462	0.462	-12.228	2.21e-34	-----+--+-+---+-------	ALSPAC ARIC_AA B58C EPIC FinnTwin hunt LBC1936 orcades Raine RS1 RS2 RS3 SHIP-1 SHIP-TREND-0 SHIP-TREND-0_B2 Split UKB_AFR UKB_AMR UKB_EAS UKB_EUR UKB_SAS VIKING	0.464757	0.263721	0.539321	0.432162	0.556707	581807	581805	577137	421045	0.4697	0.4716	0.4623	0.454	-0.0027	-0.0018	-0.0003	-0.0388	0.001	0.0011	0.0001	0.0032	0.004502	0.1035	0.0185	3.197e-34	LAPTM5(nearest), PUM1(PoPs)
PUM1	rs56080852	FALSE			1_31571172_A_T	1	31571172	FVC		A	T	0.101	0.101	-6.852	7.27e-12	+------------+------++-----+--+-+---+-+--+-+------	ALHS ALSPAC ARIC_AA ARIC_EA B58C BHS CHSAA CHSEA CKB EPIC EXCEED FHS FinnTwin GS20K H2000 HCHS hunt KORA_F4 KORA_S3 Korcula LBC1936 MESA_AFA_new MESA_CAU_new MESA_HIS_new NEO NFBC66 NFBC86 orcades PIVUS QBB Raine RS1 RS2 RS3 SAPALDIA_Edinburgh SAPALDIA_Gabriel SHIP-1 SHIP-TREND-0 SHIP-TREND-0_B2 Split Twins_UK UKB_AFR UKB_AMR UKB_EAS UKB_EUR UKB_SAS UKHLS VIKING Vis YFS	0.0619079	0.00549548	0.307559	0.0566322	0.12942	581860	581858	577190	421045	0.1702	0.1802	0.113	0.0681	-0.0081	-0.0117	0.0002	-0.0168	0.0016	0.0018	0.0003	0.0063	2.115e-07	3.722e-11	0.3378	0.007442	PUM1(PoPs,nearest)
HCRTR1	rs968335	FALSE			1_32085776_A_G	1	32085776	FEV1/FVC		A	G	0.503	0.497	6.224	4.85e-10	+--+-+-+++++-+++++-+-++++++-+?+-++--+++-++--++++++	ALHS ALSPAC ARIC_AA ARIC_EA B58C BHS CHSAA CHSEA CKB EPIC EXCEED FHS FinnTwin GS20K H2000 HCHS hunt KORA_F4 KORA_S3 Korcula LBC1936 MESA_AFA_new MESA_CAU_new MESA_HIS_new NEO NFBC66 NFBC86 orcades PIVUS QBB Raine RS1 RS2 RS3 SAPALDIA_Edinburgh SAPALDIA_Gabriel SHIP-1 SHIP-TREND-0 SHIP-TREND-0_B2 Split Twins_UK UKB_AFR UKB_AMR UKB_EAS UKB_EUR UKB_SAS UKHLS VIKING Vis YFS	0.550692	0.0839705	0.25205	0.545492	0.559783	570340	570338	565670	421045	0.5014	0.4984	0.5318	0.5396	0.0021	-0.0008	0.0008	0.0094	0.0009	0.0011	0.0001	0.0031	0.0228	0.4782	5.602e-10	0.002249	COL16A1(PoPs), HCRTR1(nearest), PEF1(eQTL)
EVA1B	rs58971913	FALSE			1_36787888_A_G	1	36787888	FEV1/FVC		A	G	0.327	0.327	6.457	1.07e-10	++-+++++-+-++++++++-++++++--+---++--+-+-+++-+++++-	ALHS ALSPAC ARIC_AA ARIC_EA B58C BHS CHSAA CHSEA CKB EPIC EXCEED FHS FinnTwin GS20K H2000 HCHS hunt KORA_F4 KORA_S3 Korcula LBC1936 MESA_AFA_new MESA_CAU_new MESA_HIS_new NEO NFBC66 NFBC86 orcades PIVUS QBB Raine RS1 RS2 RS3 SAPALDIA_Edinburgh SAPALDIA_Gabriel SHIP-1 SHIP-TREND-0 SHIP-TREND-0_B2 Split Twins_UK UKB_AFR UKB_AMR UKB_EAS UKB_EUR UKB_SAS UKHLS VIKING Vis YFS	0.383372	0.0528744	0.0751279	0.376162	0.4137	581889	581887	577219	421045	0.3625	0.3612	0.374	0.3761	0.0018	-0.0021	0.0009	0.0073	0.001	0.0012	0.0001	0.0032	0.08172	0.0843	1.342e-10	0.02187	EVA1B(eQTL,nearest), COL8A2(PoPs), CSF3R(rare_disease), RP11-268J15.5(eQTL), SH3D21(eQTL)
PPIEL	rs12035330	TRUE	rs17513135	28166213	1_40001060_A_G	1	40001060	FEV1/FVC	PEF,FEV1,FF	A	G	0.708	0.292	8.271	1.33e-16	-+-+++-+++++--+++++-+-+++--++?-+--+++-+-+-+-+++++-	ALHS ALSPAC ARIC_AA ARIC_EA B58C BHS CHSAA CHSEA CKB EPIC EXCEED FHS FinnTwin GS20K H2000 HCHS hunt KORA_F4 KORA_S3 Korcula LBC1936 MESA_AFA_new MESA_CAU_new MESA_HIS_new NEO NFBC66 NFBC86 orcades PIVUS QBB Raine RS1 RS2 RS3 SAPALDIA_Edinburgh SAPALDIA_Gabriel SHIP-1 SHIP-TREND-0 SHIP-TREND-0_B2 Split Twins_UK UKB_AFR UKB_AMR UKB_EAS UKB_EUR UKB_SAS UKHLS VIKING Vis YFS	0.741509	0.976837	0.551967	0.754149	0.909294	570341	570339	565671	421045	0.6807	0.6738	0.7195	0.7435	0.0056	0.0022	0.0012	0.0267	0.001	0.0012	0.0002	0.0035	2.898e-08	0.05904	8.766e-16	2.977e-14	PPIEL(eQTL,nearest), BMP8A(eQTL), HPCAL4(mouse_KO), MACF1(PoPs), PABPC4(eQTL), RP11-69E11.4(eQTL), TRIT1(eQTL)
SCMH1	rs2885697	FALSE			1_41544279_G_T	1	41544279	FVC		T	G	0.676	0.324	-6.715	1.89e-11	-+--+-++--++-------+-+-+------------++--+--+----++	ALHS ALSPAC ARIC_AA ARIC_EA B58C BHS CHSAA CHSEA CKB EPIC EXCEED FHS FinnTwin GS20K H2000 HCHS hunt KORA_F4 KORA_S3 Korcula LBC1936 MESA_AFA_new MESA_CAU_new MESA_HIS_new NEO NFBC66 NFBC86 orcades PIVUS QBB Raine RS1 RS2 RS3 SAPALDIA_Edinburgh SAPALDIA_Gabriel SHIP-1 SHIP-TREND-0 SHIP-TREND-0_B2 Split Twins_UK UKB_AFR UKB_AMR UKB_EAS UKB_EUR UKB_SAS UKHLS VIKING Vis YFS	0.665304	0.898775	0.656267	0.698629	0.79141	581888	581886	577218	421045	0.6757	0.6765	0.6705	0.6603	-0.0043	-0.0068	0.0004	-0.0109	0.001	0.0011	0.0001	0.0032	9.658e-06	1.297e-09	0.002808	0.0008024	SCMH1(eQTL,WES,PoPs,nearest), CTPS1(rare_disease)
CCDC17	rs61789988	FALSE			1_46085242_C_G	1	46085242	FEV1/FVC		C	G	0.497	0.497	7.848	4.24e-15	??+?????+?????+??????????????+???????????++-++????	ALHS ALSPAC ARIC_AA ARIC_EA B58C BHS CHSAA CHSEA CKB EPIC EXCEED FHS FinnTwin GS20K H2000 HCHS hunt KORA_F4 KORA_S3 Korcula LBC1936 MESA_AFA_new MESA_CAU_new MESA_HIS_new NEO NFBC66 NFBC86 orcades PIVUS QBB Raine RS1 RS2 RS3 SAPALDIA_Edinburgh SAPALDIA_Gabriel SHIP-1 SHIP-TREND-0 SHIP-TREND-0_B2 Split Twins_UK UKB_AFR UKB_AMR UKB_EAS UKB_EUR UKB_SAS UKHLS VIKING Vis YFS	0.461188	0.390276	0.614968	0.50163	0.492497	435386	435386	435386	336335	0.5039	0.5099	0.4767	0.4617	0.0035	-0.0004	0.0011	0.0159	0.0011	0.0012	0.0001	0.0036	0.0012	0.7211	3.642e-14	8.356e-06	CCDC17(nearest), EIF2B3(eQTL), MAST2(PoPs), MMACHC(mouse_KO)
STIL	rs765861	FALSE			1_47709201_A_T	1	47709201	FEV1	PEF,FEV1	A	T	0.416	0.416	-5.889	3.89e-09	----------+-+----++--+---+-+--+-+----+---+---++---	ALHS ALSPAC ARIC_AA ARIC_EA B58C BHS CHSAA CHSEA CKB EPIC EXCEED FHS FinnTwin GS20K H2000 HCHS hunt KORA_F4 KORA_S3 Korcula LBC1936 MESA_AFA_new MESA_CAU_new MESA_HIS_new NEO NFBC66 NFBC86 orcades PIVUS QBB Raine RS1 RS2 RS3 SAPALDIA_Edinburgh SAPALDIA_Gabriel SHIP-1 SHIP-TREND-0 SHIP-TREND-0_B2 Split Twins_UK UKB_AFR UKB_AMR UKB_EAS UKB_EUR UKB_SAS UKHLS VIKING Vis YFS	0.488486	0.123289	0.0310391	0.508663	0.432355	581870	581868	577200	421045	0.4774	0.4769	0.4838	0.4796	-0.0063	-0.0047	-0.0007	-0.0176	0.001	0.0012	0.0001	0.0031	4.763e-10	9.546e-05	1.063e-06	1.503e-08	FOXD2(PoPs), STIL(nearest)
FAF1	rs1416685	TRUE	rs1416685	30804560	1_51243374_C_G	1	51243374	PEF	PEF,FEV1,FF	C	G	0.41	0.41	13.289	2.69e-40	++++++-+-+++++++++-++-	ALSPAC ARIC_AA B58C EPIC FinnTwin hunt LBC1936 orcades Raine RS1 RS2 RS3 SHIP-1 SHIP-TREND-0 SHIP-TREND-0_B2 Split UKB_AFR UKB_AMR UKB_EAS UKB_EUR UKB_SAS VIKING	0.408082	0.596992	0.20511	0.563116	0.342775	581887	581885	577217	421045	0.3815	0.3777	0.3988	0.4049	0.0058	0.0023	0.0012	0.041	0.001	0.0011	0.0001	0.0031	2.207e-09	0.04489	3.882e-17	1.539e-39	CDKN2C(PoPs), FAF1(nearest)
FAF1	rs553050641	FALSE			1_51361898_A_G	1	51361898	FEV1/FVC		A	G	0.0037	0.0037	6.383	1.74e-10	??????????????????????????????????????????+?????	ALHS ALSPAC ARIC_AA ARIC_EA B58C BHS CHSAA CHSEA CKB EPIC EXCEED FHS FinnTwin GS20K H2000 HCHS hunt KORA_F4 KORA_S3 Korcula LBC1936 MESA_AFA_new MESA_CAU_new MESA_HIS_new NEO NFBC66 NFBC86 orcades PIVUS Raine RS1 RS2 RS3 SAPALDIA_Edinburgh SAPALDIA_Gabriel SHIP-1 SHIP-TREND-0 SHIP-TREND-0_B2 Split Twins_UK UKB_AFR UKB_EAS UKB_EUR UKB_SAS UKHLS VIKING Vis YFS	0.00366782	0.000132203	2.13129e-05	0.000363705	0.000450934	320656	320656	320656	320656	0.0037	0.0037	0.0037	0.0037	0.0485	0.0192	0.0093	0.1188	0.0121	0.0144	0.0015	0.0346	6.36e-05	0.1831	1.007e-09	0.0005984	CDKN2C(PoPs), FAF1(nearest)
MIR4422	rs111204083	FALSE			1_56128759_C_T	1	56128759	FVC	FEV1,FVC	T	C	0.683	0.317	-6.557	5.49e-11	-+---+----+-+-??+---+?-?-----?+-++-+---++-+--+----	ALHS ALSPAC ARIC_AA ARIC_EA B58C BHS CHSAA CHSEA CKB EPIC EXCEED FHS FinnTwin GS20K H2000 HCHS hunt KORA_F4 KORA_S3 Korcula LBC1936 MESA_AFA_new MESA_CAU_new MESA_HIS_new NEO NFBC66 NFBC86 orcades PIVUS QBB Raine RS1 RS2 RS3 SAPALDIA_Edinburgh SAPALDIA_Gabriel SHIP-1 SHIP-TREND-0 SHIP-TREND-0_B2 Split Twins_UK UKB_AFR UKB_AMR UKB_EAS UKB_EUR UKB_SAS UKHLS VIKING Vis YFS	0.73334	0.674937	0.503162	0.791508	0.667808	553766	553764	549096	408267	0.6644	0.6549	0.7083	0.733	-0.0052	-0.0077	0.0002	0.0013	0.0011	0.0013	0.0002	0.0036	1.467e-06	9.235e-10	0.2266	0.7171	MIR4422(nearest), USP24(PoPs)
LOC101926964	rs149423502	TRUE	rs72673461	30804560	1_60951839_A_C	1	60951839	FEV1/FVC	PEF,FEV1,FF	A	C	0.0465	0.0465	-10.88	1.43e-27	--+--+-+?---+-?----+-+-+----+0++---+-----+--------	ALHS ALSPAC ARIC_AA ARIC_EA B58C BHS CHSAA CHSEA CKB EPIC EXCEED FHS FinnTwin GS20K H2000 HCHS hunt KORA_F4 KORA_S3 Korcula LBC1936 MESA_AFA_new MESA_CAU_new MESA_HIS_new NEO NFBC66 NFBC86 orcades PIVUS QBB Raine RS1 RS2 RS3 SAPALDIA_Edinburgh SAPALDIA_Gabriel SHIP-1 SHIP-TREND-0 SHIP-TREND-0_B2 Split Twins_UK UKB_AFR UKB_AMR UKB_EAS UKB_EUR UKB_SAS UKHLS VIKING Vis YFS	0.0495874	0.00456542	0.00302392	0.0174417	0.0324609	492820	492818	488150	419481	0.0481	0.048	0.0483	0.0484	-0.0142	-0.0011	-0.0035	-0.0349	0.0024	0.0028	0.0003	0.0072	2.955e-09	0.6853	2.979e-26	1.175e-06	LOC101926964(nearest), NFIA(PoPs), RP11-776H12.1(eQTL)
NFIA	rs2474383	FALSE			1_61869068_C_T	1	61869068	FVC		T	C	0.317	0.317	-6.354	2.1e-10	+---+---------+--++--+--++-++--+----------++-+--++	ALHS ALSPAC ARIC_AA ARIC_EA B58C BHS CHSAA CHSEA CKB EPIC EXCEED FHS FinnTwin GS20K H2000 HCHS hunt KORA_F4 KORA_S3 Korcula LBC1936 MESA_AFA_new MESA_CAU_new MESA_HIS_new NEO NFBC66 NFBC86 orcades PIVUS QBB Raine RS1 RS2 RS3 SAPALDIA_Edinburgh SAPALDIA_Gabriel SHIP-1 SHIP-TREND-0 SHIP-TREND-0_B2 Split Twins_UK UKB_AFR UKB_AMR UKB_EAS UKB_EUR UKB_SAS UKHLS VIKING Vis YFS	0.269521	0.360421	0.590793	0.293424	0.301171	581889	581887	577219	421045	0.3395	0.3469	0.3014	0.2725	-0.0042	-0.0068	0.0004	-0.0057	0.001	0.0011	0.0001	0.0034	1.881e-05	3.245e-09	0.01459	0.09728	NFIA(PoPs,nearest)
LEPR	rs10889560	FALSE			1_65989878_A_C	1	65989878	FVC		A	C	0.0843	0.0843	-6.189	6.06e-10	----------+--+-------+----+-----+---+---++-+------	ALHS ALSPAC ARIC_AA ARIC_EA B58C BHS CHSAA CHSEA CKB EPIC EXCEED FHS FinnTwin GS20K H2000 HCHS hunt KORA_F4 KORA_S3 Korcula LBC1936 MESA_AFA_new MESA_CAU_new MESA_HIS_new NEO NFBC66 NFBC86 orcades PIVUS QBB Raine RS1 RS2 RS3 SAPALDIA_Edinburgh SAPALDIA_Gabriel SHIP-1 SHIP-TREND-0 SHIP-TREND-0_B2 Split Twins_UK UKB_AFR UKB_AMR UKB_EAS UKB_EUR UKB_SAS UKHLS VIKING Vis YFS	0.0813507	0.199182	0.0678301	0.142548	0.304164	581889	581887	577219	421045	0.0938	0.0929	0.0941	0.0913	-0.0091	-0.0121	0.0001	-0.0179	0.0016	0.0019	0.0002	0.0054	3.1e-08	3.061e-10	0.5649	0.0009862	LEPR(PoPs,nearest)
SERBP1	rs11209113	FALSE			1_68022387_C_T	1	68022387	FEV1/FVC		T	C	0.722	0.278	-5.867	4.44e-09	??-?????-??????--????-?-?????-???????????+-+-+????	ALHS ALSPAC ARIC_AA ARIC_EA B58C BHS CHSAA CHSEA CKB EPIC EXCEED FHS FinnTwin GS20K H2000 HCHS hunt KORA_F4 KORA_S3 Korcula LBC1936 MESA_AFA_new MESA_CAU_new MESA_HIS_new NEO NFBC66 NFBC86 orcades PIVUS QBB Raine RS1 RS2 RS3 SAPALDIA_Edinburgh SAPALDIA_Gabriel SHIP-1 SHIP-TREND-0 SHIP-TREND-0_B2 Split Twins_UK UKB_AFR UKB_AMR UKB_EAS UKB_EUR UKB_SAS UKHLS VIKING Vis YFS	0.722539	0.634986	0.710468	0.674392	0.711377	460728	460728	460728	365467	0.721	0.7215	0.7196	0.7194	-0.001	0.0027	-0.001	-0.0075	0.0012	0.0014	0.0002	0.0039	0.3757	0.04722	4.16e-09	0.0535	GADD45A(eQTL), GNG12(PoPs), SERBP1(nearest)
FAM73A	rs4121165	FALSE			1_78276977_A_G	1	78276977	FEV1/FVC	PEF,FEV1,FF	A	G	0.233	0.233	-6.419	1.38e-10	----+-+----+-------++--++-++-+-+++---+++--+-+----	ALHS ALSPAC ARIC_AA ARIC_EA B58C BHS CHSAA CHSEA CKB EPIC EXCEED FHS FinnTwin GS20K H2000 HCHS hunt KORA_F4 KORA_S3 Korcula LBC1936 MESA_AFA_new MESA_CAU_new MESA_HIS_new NEO NFBC66 NFBC86 orcades PIVUS Raine RS1 RS2 RS3 SAPALDIA_Edinburgh SAPALDIA_Gabriel SHIP-1 SHIP-TREND-0 SHIP-TREND-0_B2 Split Twins_UK UKB_AFR UKB_AMR UKB_EAS UKB_EUR UKB_SAS UKHLS VIKING Vis YFS	0.21126	0.193397	0.416487	0.217061	0.0757028	581886	581884	577216	421045	0.2569	0.2629	0.2294	0.2097	-0.006	-0.0025	-0.0012	-0.0212	0.0011	0.0012	0.0002	0.0037	2.875e-08	0.04511	2.153e-14	1.569e-08	NEXN(eQTL,PoPs), DNAJB4(eQTL), FAM73A(nearest), GIPC2(eQTL), ZZZ3(eQTL)
GIPC2	rs661038	TRUE	rs9661687	30804560	1_78542831_A_C	1	78542831	FEV1/FVC		A	C	0.0769	0.0769	8.677	4.07e-18	--+++++-++-+-+++++---+++-+++--+--++--++-++++++++--	ALHS ALSPAC ARIC_AA ARIC_EA B58C BHS CHSAA CHSEA CKB EPIC EXCEED FHS FinnTwin GS20K H2000 HCHS hunt KORA_F4 KORA_S3 Korcula LBC1936 MESA_AFA_new MESA_CAU_new MESA_HIS_new NEO NFBC66 NFBC86 orcades PIVUS QBB Raine RS1 RS2 RS3 SAPALDIA_Edinburgh SAPALDIA_Gabriel SHIP-1 SHIP-TREND-0 SHIP-TREND-0_B2 Split Twins_UK UKB_AFR UKB_AMR UKB_EAS UKB_EUR UKB_SAS UKHLS VIKING Vis YFS	0.073813	0.040454	0.078005	0.083274	0.120141	581889	581887	577219	421045	0.0812	0.0812	0.0806	0.0878	0.007	0.0002	0.0021	0.0341	0.0017	0.002	0.0002	0.0058	3.226e-05	0.9235	3.56e-17	3.163e-09	NEXN(eQTL,PoPs), GIPC2(nearest)
LINC01361	rs975785	FALSE			1_83187476_A_G	1	83187476	FEV1		A	G	0.31	0.31	-5.964	2.46e-09	----+-+-----+--+----+-+++---+--+-+-+++++++-+---+++	ALHS ALSPAC ARIC_AA ARIC_EA B58C BHS CHSAA CHSEA CKB EPIC EXCEED FHS FinnTwin GS20K H2000 HCHS hunt KORA_F4 KORA_S3 Korcula LBC1936 MESA_AFA_new MESA_CAU_new MESA_HIS_new NEO NFBC66 NFBC86 orcades PIVUS QBB Raine RS1 RS2 RS3 SAPALDIA_Edinburgh SAPALDIA_Gabriel SHIP-1 SHIP-TREND-0 SHIP-TREND-0_B2 Split Twins_UK UKB_AFR UKB_AMR UKB_EAS UKB_EUR UKB_SAS UKHLS VIKING Vis YFS	0.333582	0.0717048	0.249917	0.202189	0.291004	581889	581887	577219	421045	0.311	0.31	0.3228	0.3257	-0.0054	-0.0056	-0.0003	-0.0126	0.001	0.0012	0.0001	0.0033	3.529e-08	1.31e-06	0.01961	0.0001057	LINC01361(nearest)
CDC7	rs17502103	FALSE			1_92031110_C_T	1	92031110	FEV1/FVC	FVC,FF	T	C	0.718	0.282	8.095	5.74e-16	---+++++++-+-+-+++-++-++++-++--+---++-++---+-++++	ALHS ALSPAC ARIC_AA ARIC_EA B58C BHS CHSAA CHSEA CKB EPIC EXCEED FHS FinnTwin GS20K H2000 HCHS hunt KORA_F4 KORA_S3 Korcula LBC1936 MESA_AFA_new MESA_CAU_new MESA_HIS_new NEO NFBC66 NFBC86 orcades PIVUS Raine RS1 RS2 RS3 SAPALDIA_Edinburgh SAPALDIA_Gabriel SHIP-1 SHIP-TREND-0 SHIP-TREND-0_B2 Split Twins_UK UKB_AFR UKB_AMR UKB_EAS UKB_EUR UKB_SAS UKHLS VIKING Vis YFS	0.675903	0.925971	0.957935	0.667222	0.804239	581888	581886	577218	421045	0.6931	0.6943	0.6859	0.6852	-0.0024	-0.0056	0.0006	-0.0033	0.0011	0.0013	0.0001	0.0033	0.02771	7.94e-06	7.223e-05	0.3161	CDC7(eQTL,nearest), TGFBR3(eQTL,PoPs)
TGFBR3	rs1192415	TRUE	rs1192404	28166213	1_92077097_A_G	1	92077097	FEV1/FVC	FVC,FF	A	G	0.818	0.182	15.632	4.38e-55	+++++++++++-++++++++++++-++-+++-+++++-+-+++-++++++	ALHS ALSPAC ARIC_AA ARIC_EA B58C BHS CHSAA CHSEA CKB EPIC EXCEED FHS FinnTwin GS20K H2000 HCHS hunt KORA_F4 KORA_S3 Korcula LBC1936 MESA_AFA_new MESA_CAU_new MESA_HIS_new NEO NFBC66 NFBC86 orcades PIVUS QBB Raine RS1 RS2 RS3 SAPALDIA_Edinburgh SAPALDIA_Gabriel SHIP-1 SHIP-TREND-0 SHIP-TREND-0_B2 Split Twins_UK UKB_AFR UKB_AMR UKB_EAS UKB_EUR UKB_SAS UKHLS VIKING Vis YFS	0.811844	0.822924	0.883951	0.818442	0.705035	581889	581887	577219	421045	0.8163	0.8173	0.8119	0.8015	-0.0007	-0.0113	0.0025	0.0226	0.0012	0.0014	0.0002	0.0039	0.5669	2.116e-16	1.991e-50	6.105e-09	TGFBR3(eQTL,PoPs,nearest), CDC7(eQTL)
TGFBR3	rs10874851	TRUE	rs10874851	30804560	1_92106637_A_C	1	92106637	FEV1/FVC	FVC,FF	A	C	0.537	0.463	-9.701	2.97e-22	-----++-+--------+++-+++----+--+--+-++---------+-	ALHS ALSPAC ARIC_AA ARIC_EA B58C BHS CHSAA CHSEA CKB EPIC EXCEED FHS FinnTwin GS20K H2000 HCHS hunt KORA_F4 KORA_S3 Korcula LBC1936 MESA_AFA_new MESA_CAU_new MESA_HIS_new NEO NFBC66 NFBC86 orcades PIVUS Raine RS1 RS2 RS3 SAPALDIA_Edinburgh SAPALDIA_Gabriel SHIP-1 SHIP-TREND-0 SHIP-TREND-0_B2 Split Twins_UK UKB_AFR UKB_AMR UKB_EAS UKB_EUR UKB_SAS UKHLS VIKING Vis YFS	0.476701	0.908919	0.929667	0.664224	0.551874	581889	581887	577219	421045	0.5137	0.5169	0.4935	0.4885	-0.0004	0.0036	-0.0009	-0.0038	0.001	0.0011	0.0001	0.0031	0.6946	0.001546	9.689e-11	0.2109	TGFBR3(PoPs,nearest)
TGFBR3	rs1805116	FALSE			1_92149096_C_T	1	92149096	FEV1/FVC	FVC,FF	T	C	0.158	0.158	-9.877	5.24e-23	---++-------+-+---++-+----------------+---+--+---	ALHS ALSPAC ARIC_AA ARIC_EA B58C BHS CHSAA CHSEA CKB EPIC EXCEED FHS FinnTwin GS20K H2000 HCHS hunt KORA_F4 KORA_S3 Korcula LBC1936 MESA_AFA_new MESA_CAU_new MESA_HIS_new NEO NFBC66 NFBC86 orcades PIVUS Raine RS1 RS2 RS3 SAPALDIA_Edinburgh SAPALDIA_Gabriel SHIP-1 SHIP-TREND-0 SHIP-TREND-0_B2 Split Twins_UK UKB_AFR UKB_AMR UKB_EAS UKB_EUR UKB_SAS UKHLS VIKING Vis YFS	0.168142	0.0251822	0.0977057	0.151401	0.108697	581889	581887	577219	421045	0.1582	0.1573	0.164	0.1647	0.0035	0.0101	-0.0012	-0.0031	0.0013	0.0015	0.0002	0.0041	0.005753	1.108e-11	1.357e-11	0.4543	TGFBR3(PoPs,nearest)
TGFBR3	rs80151214	TRUE	rs4233430	31911640	1_92157142_A_G	1	92157142	FEV1/FVC		A	G	0.79	0.21	-6.961	3.38e-12	----++++-------++-++--++--+-----+-+--+-+++--+---+	ALHS ALSPAC ARIC_AA ARIC_EA B58C BHS CHSAA CHSEA CKB EPIC EXCEED FHS FinnTwin GS20K H2000 HCHS hunt KORA_F4 KORA_S3 Korcula LBC1936 MESA_AFA_new MESA_CAU_new MESA_HIS_new NEO NFBC66 NFBC86 orcades PIVUS Raine RS1 RS2 RS3 SAPALDIA_Edinburgh SAPALDIA_Gabriel SHIP-1 SHIP-TREND-0 SHIP-TREND-0_B2 Split Twins_UK UKB_AFR UKB_AMR UKB_EAS UKB_EUR UKB_SAS UKHLS VIKING Vis YFS	0.816221	0.952689	0.606161	0.891937	0.89709	581886	581884	577216	421045	0.7563	0.7492	0.7892	0.8173	-0.0012	0.0046	-0.0015	-0.0094	0.0011	0.0013	0.0002	0.004	0.2695	0.0004257	3.422e-20	0.01796	TGFBR3(PoPs,nearest)
TGFBR3	rs12732630	TRUE	rs12140637	28166213	1_92382899_A_G	1	92382899	FEV1/FVC	PEF,FVC,FF	A	G	0.298	0.298	-11.484	1.59e-30	+-+---+--+---------+-----+---+---+--+---+--------	ALHS ALSPAC ARIC_AA ARIC_EA B58C BHS CHSAA CHSEA CKB EPIC EXCEED FHS FinnTwin GS20K H2000 HCHS hunt KORA_F4 KORA_S3 Korcula LBC1936 MESA_AFA_new MESA_CAU_new MESA_HIS_new NEO NFBC66 NFBC86 orcades PIVUS Raine RS1 RS2 RS3 SAPALDIA_Edinburgh SAPALDIA_Gabriel SHIP-1 SHIP-TREND-0 SHIP-TREND-0_B2 Split Twins_UK UKB_AFR UKB_AMR UKB_EAS UKB_EUR UKB_SAS UKHLS VIKING Vis YFS	0.310869	0.0595476	0.201178	0.335236	0.351275	581877	581875	577207	421045	0.2977	0.2964	0.3073	0.3084	0.0011	0.0072	-0.0014	-0.0181	0.001	0.0012	0.0001	0.0033	0.2634	9.107e-10	8.603e-24	4.872e-08	TGFBR3(PoPs,nearest)
FAM69A	rs10782945	FALSE			1_93304272_C_T	1	93304272	FEV1/FVC		T	C	0.659	0.341	-6.621	3.57e-11	--+-----++--+----+-+-++++--++-+---+-+-+++-+-+--+-	ALHS ALSPAC ARIC_AA ARIC_EA B58C BHS CHSAA CHSEA CKB EPIC EXCEED FHS FinnTwin GS20K H2000 HCHS hunt KORA_F4 KORA_S3 Korcula LBC1936 MESA_AFA_new MESA_CAU_new MESA_HIS_new NEO NFBC66 NFBC86 orcades PIVUS Raine RS1 RS2 RS3 SAPALDIA_Edinburgh SAPALDIA_Gabriel SHIP-1 SHIP-TREND-0 SHIP-TREND-0_B2 Split Twins_UK UKB_AFR UKB_AMR UKB_EAS UKB_EUR UKB_SAS UKHLS VIKING Vis YFS	0.623685	0.398917	0.931755	0.705069	0.785285	581882	581880	577212	421045	0.6394	0.6408	0.6279	0.6174	-0.002	0.0027	-0.0012	-0.0082	0.001	0.0012	0.0001	0.0032	0.05023	0.02292	2.53e-17	0.009164	EVI5(PoPs), FAM69A(nearest), GFI1(rare_disease), SNORA66(eQTL)
COL11A1	rs2376280	FALSE			1_103568464_A_G	1	103568464	PEF		A	G	0.592	0.408	7.789	6.76e-15	++++++-+--+++++++-++++	ALSPAC ARIC_AA B58C EPIC FinnTwin hunt LBC1936 orcades Raine RS1 RS2 RS3 SHIP-1 SHIP-TREND-0 SHIP-TREND-0_B2 Split UKB_AFR UKB_AMR UKB_EAS UKB_EUR UKB_SAS VIKING	0.597034	0.159871	0.912682	0.53125	0.717273	581889	581887	577219	421045	0.6136	0.6163	0.5997	0.5892	0.0009	-0.0018	0.0006	0.0229	0.001	0.0012	0.0001	0.0031	0.3724	0.1133	3.089e-05	2.548e-13	COL11A1(PoPs,nearest)
DENND2D	rs10857859	TRUE	rs9970286	30804560	1_111733724_C_G	1	111733724	FEV1/FVC	FEV1,FF	C	G	0.337	0.337	11.792	4.32e-32	++++++--+++++++++++++++-+-++-++-++++-++-+++-+++++-	ALHS ALSPAC ARIC_AA ARIC_EA B58C BHS CHSAA CHSEA CKB EPIC EXCEED FHS FinnTwin GS20K H2000 HCHS hunt KORA_F4 KORA_S3 Korcula LBC1936 MESA_AFA_new MESA_CAU_new MESA_HIS_new NEO NFBC66 NFBC86 orcades PIVUS QBB Raine RS1 RS2 RS3 SAPALDIA_Edinburgh SAPALDIA_Gabriel SHIP-1 SHIP-TREND-0 SHIP-TREND-0_B2 Split Twins_UK UKB_AFR UKB_AMR UKB_EAS UKB_EUR UKB_SAS UKHLS VIKING Vis YFS	0.334847	0.248539	0.402025	0.2121	0.24981	581882	581880	577212	421045	0.342	0.344	0.3352	0.3264	0.0067	0.002	0.0015	0.0158	0.001	0.0011	0.0001	0.0033	3.22e-12	0.07644	2.665e-27	1.301e-06	DENND2D(nearest), WDR77(PoPs)
DENND2D	rs629619	TRUE	rs629619	30804561	1_111738108_C_T	1	111738108	FEV1/FVC		T	C	0.196	0.196	-6.291	3.15e-10	+----+--?-+---+---+--+------+----+--+--+--?--++--	ALHS ALSPAC ARIC_AA ARIC_EA B58C BHS CHSAA CHSEA CKB EPIC EXCEED FHS FinnTwin GS20K H2000 HCHS hunt KORA_F4 KORA_S3 Korcula LBC1936 MESA_AFA_new MESA_CAU_new MESA_HIS_new NEO NFBC66 NFBC86 orcades PIVUS Raine RS1 RS2 RS3 SAPALDIA_Edinburgh SAPALDIA_Gabriel SHIP-1 SHIP-TREND-0 SHIP-TREND-0_B2 Split Twins_UK UKB_AFR UKB_AMR UKB_EAS UKB_EUR UKB_SAS UKHLS VIKING Vis YFS	0.199005	0.226283	0.00383632	0.221408	0.192506	581882	581880	577212	421045	0.1948	0.1943	0.196	0.1957	-0.0043	0.0019	-0.0016	-0.0168	0.0013	0.0015	0.0002	0.0038	0.0007423	0.2046	3.965e-20	1.231e-05	DENND2D(nearest), WDR77(PoPs)
CTTNBP2NL	rs12119865	FALSE			1_112945783_C_G	1	112945783	FEV1/FVC		C	G	0.688	0.312	6.939	3.96e-12	++++-+++++++-+++++++-++++-+-++-++++++++++++++-+++	ALHS ALSPAC ARIC_AA ARIC_EA B58C BHS CHSAA CHSEA CKB EPIC EXCEED FHS FinnTwin GS20K H2000 HCHS hunt KORA_F4 KORA_S3 Korcula LBC1936 MESA_AFA_new MESA_CAU_new MESA_HIS_new NEO NFBC66 NFBC86 orcades PIVUS Raine RS1 RS2 RS3 SAPALDIA_Edinburgh SAPALDIA_Gabriel SHIP-1 SHIP-TREND-0 SHIP-TREND-0_B2 Split Twins_UK UKB_AFR UKB_AMR UKB_EAS UKB_EUR UKB_SAS UKHLS VIKING Vis YFS	0.724457	0.837237	0.454923	0.705147	0.735246	581877	581875	577207	421045	0.6555	0.6481	0.6944	0.7238	0.0017	-0.0018	0.001	0.005	0.001	0.0011	0.0001	0.0034	0.08038	0.1191	1.475e-12	0.1443	CTTNBP2NL(nearest), WNT2B(PoPs)
WNT2B	rs351370	FALSE			1_113054659_C_T	1	113054659	FVC		T	C	0.616	0.384	-6.628	3.41e-11	+------+------+------+-++------+------+++--+---++-	ALHS ALSPAC ARIC_AA ARIC_EA B58C BHS CHSAA CHSEA CKB EPIC EXCEED FHS FinnTwin GS20K H2000 HCHS hunt KORA_F4 KORA_S3 Korcula LBC1936 MESA_AFA_new MESA_CAU_new MESA_HIS_new NEO NFBC66 NFBC86 orcades PIVUS QBB Raine RS1 RS2 RS3 SAPALDIA_Edinburgh SAPALDIA_Gabriel SHIP-1 SHIP-TREND-0 SHIP-TREND-0_B2 Split Twins_UK UKB_AFR UKB_AMR UKB_EAS UKB_EUR UKB_SAS UKHLS VIKING Vis YFS	0.586714	0.503903	0.740409	0.577913	0.714754	581860	581858	577190	421045	0.6149	0.6188	0.5986	0.5835	-0.0036	-0.0069	0.0005	-0.0053	0.0009	0.0011	0.0001	0.0031	0.0001375	3.952e-10	0.000833	0.08662	WNT2B(PoPs,nearest), CAPZA1(eQTL), RHOC(eQTL), snoU13(eQTL), ST7L(eQTL)
SPAG17	rs7536458	TRUE	rs200154334	28166213	1_118864602_G_T	1	118864602	FVC	PEF,FEV1,FVC	T	G	0.727	0.273	-9.242	2.42e-20	-----+-----------++---+---++--+++---+++--+---+++-+	ALHS ALSPAC ARIC_AA ARIC_EA B58C BHS CHSAA CHSEA CKB EPIC EXCEED FHS FinnTwin GS20K H2000 HCHS hunt KORA_F4 KORA_S3 Korcula LBC1936 MESA_AFA_new MESA_CAU_new MESA_HIS_new NEO NFBC66 NFBC86 orcades PIVUS QBB Raine RS1 RS2 RS3 SAPALDIA_Edinburgh SAPALDIA_Gabriel SHIP-1 SHIP-TREND-0 SHIP-TREND-0_B2 Split Twins_UK UKB_AFR UKB_AMR UKB_EAS UKB_EUR UKB_SAS UKHLS VIKING Vis YFS	0.737643	0.835507	0.656523	0.705198	0.684823	581889	581887	577219	421045	0.7212	0.7189	0.7316	0.7421	-0.0076	-0.0102	0.0001	-0.018	0.001	0.0012	0.0001	0.0035	6.107e-14	2.995e-18	0.5342	2.08e-07	SPAG17(PoPs,nearest), RP11-418J17.1(eQTL), WARS2(eQTL), WARS2-IT1(eQTL)
TBX15	rs946210	FALSE			1_119474834_C_T	1	119474834	FVC		T	C	0.25	0.25	-5.951	2.66e-09	-++----+-++-----+------------++---++-+---++-+---+	ALHS ALSPAC ARIC_AA ARIC_EA B58C BHS CHSAA CHSEA CKB EPIC EXCEED FHS FinnTwin GS20K H2000 HCHS hunt KORA_F4 KORA_S3 Korcula LBC1936 MESA_AFA_new MESA_CAU_new MESA_HIS_new NEO NFBC66 NFBC86 orcades PIVUS Raine RS1 RS2 RS3 SAPALDIA_Edinburgh SAPALDIA_Gabriel SHIP-1 SHIP-TREND-0 SHIP-TREND-0_B2 Split Twins_UK UKB_AFR UKB_AMR UKB_EAS UKB_EUR UKB_SAS UKHLS VIKING Vis YFS	0.209455	0.0820426	0.506652	0.21662	0.144634	581889	581887	577219	421045	0.2987	0.3084	0.247	0.2115	-0.0044	-0.0062	0.0001	-0.0057	0.0011	0.0012	0.0002	0.0037	2.684e-05	4.886e-07	0.4839	0.1287	TBX15(PoPs,nearest)
BCL9	rs17160476	FALSE			1_147093674_A_G	1	147093674	FEV1	FEV1,FF	A	G	0.817	0.183	-6.094	1.1e-09	++++---+--+-+-----+-++-+--+--------+-+++-++-----+-	ALHS ALSPAC ARIC_AA ARIC_EA B58C BHS CHSAA CHSEA CKB EPIC EXCEED FHS FinnTwin GS20K H2000 HCHS hunt KORA_F4 KORA_S3 Korcula LBC1936 MESA_AFA_new MESA_CAU_new MESA_HIS_new NEO NFBC66 NFBC86 orcades PIVUS QBB Raine RS1 RS2 RS3 SAPALDIA_Edinburgh SAPALDIA_Gabriel SHIP-1 SHIP-TREND-0 SHIP-TREND-0_B2 Split Twins_UK UKB_AFR UKB_AMR UKB_EAS UKB_EUR UKB_SAS UKHLS VIKING Vis YFS	0.838628	0.56834	0.716605	0.751614	0.817382	581889	581887	577219	421045	0.8041	0.8018	0.816	0.8258	-0.0066	-0.0049	-0.0009	-0.0143	0.0012	0.0014	0.0002	0.0041	2.642e-08	0.0002849	5.306e-07	0.0004519	BCL9(PoPs,nearest), ACP6(eQTL)
MTMR11	rs72692821	FALSE			1_149905279_A_G	1	149905279	FEV1/FVC		A	G	0.168	0.168	7.581	3.44e-14	++-+----++-++++++++++++++++++-+++++++-+++---++++++	ALHS ALSPAC ARIC_AA ARIC_EA B58C BHS CHSAA CHSEA CKB EPIC EXCEED FHS FinnTwin GS20K H2000 HCHS hunt KORA_F4 KORA_S3 Korcula LBC1936 MESA_AFA_new MESA_CAU_new MESA_HIS_new NEO NFBC66 NFBC86 orcades PIVUS QBB Raine RS1 RS2 RS3 SAPALDIA_Edinburgh SAPALDIA_Gabriel SHIP-1 SHIP-TREND-0 SHIP-TREND-0_B2 Split Twins_UK UKB_AFR UKB_AMR UKB_EAS UKB_EUR UKB_SAS UKHLS VIKING Vis YFS	0.146202	0.037157	0.302412	0.133721	0.187691	581886	581884	577216	421045	0.1861	0.1907	0.1647	0.1491	0.0068	0.0042	0.0012	0.0193	0.0012	0.0014	0.0002	0.0043	1.933e-08	0.002726	1.013e-11	8.054e-06	MTMR11(credible,nearest), PLEKHO1(PoPs), VPS45(rare_disease)
CIART	rs6685252	TRUE	rs11205354	30804560	1_150259945_A_T	1	150259945	PEF		A	T	0.392	0.392	7.015	2.3e-12	++++++++++----+-++-+++	ALSPAC ARIC_AA B58C EPIC FinnTwin hunt LBC1936 orcades Raine RS1 RS2 RS3 SHIP-1 SHIP-TREND-0 SHIP-TREND-0_B2 Split UKB_AFR UKB_AMR UKB_EAS UKB_EUR UKB_SAS VIKING	0.384295	0.589158	0.769593	0.397128	0.606249	581887	581885	577217	421045	0.4489	0.4545	0.4152	0.3917	0.0058	0.0056	0.0004	0.022	0.001	0.0011	0.0001	0.0031	1.042e-09	5.395e-07	0.002656	2.448e-12	ADAMTSL4(eQTL,WES), ADAMTSL4-AS1(eQTL), ARNT(eQTL), CERS2(eQTL), CIART(nearest), CTSK(eQTL), ENSA(eQTL), GOLPH3L(eQTL), PLEKHO1(PoPs), SETDB1(eQTL), VPS45(rare_disease)
MRPS21	rs509345	FALSE			1_150276022_A_G	1	150276022	FEV1		A	G	0.472	0.472	-6.919	4.55e-12	+-+-+++----+--+--+---++-----++++---++++-?+---+-+	ALHS ALSPAC ARIC_AA ARIC_EA B58C BHS CHSAA CHSEA CKB EPIC EXCEED FHS FinnTwin GS20K HCHS hunt KORA_F4 KORA_S3 Korcula LBC1936 MESA_AFA_new MESA_CAU_new MESA_HIS_new NEO NFBC66 NFBC86 orcades PIVUS Raine RS1 RS2 RS3 SAPALDIA_Edinburgh SAPALDIA_Gabriel SHIP-1 SHIP-TREND-0 SHIP-TREND-0_B2 Split Twins_UK UKB_AFR UKB_AMR UKB_EAS UKB_EUR UKB_SAS UKHLS VIKING Vis YFS	0.514706	0.191136	0.229799	0.560703	0.368945	581889	581887	577219	421045	0.4679	0.4611	0.4927	0.5101	-0.0054	-0.0052	-0.0004	-0.0187	0.0009	0.0011	0.0001	0.0031	7.51e-09	1.936e-06	0.003703	1.004e-09	ADAMTSL4(WES), MRPS21(nearest), PLEKHO1(PoPs), VPS45(rare_disease)
MCL1	rs878471	TRUE	rs6681426	26635082	1_150547747_A_G	1	150547747	FVC	FEV1,FVC	A	G	0.543	0.457	-12.096	1.11e-33	----------+-+----+-----+-+----+-++-----++-------++	ALHS ALSPAC ARIC_AA ARIC_EA B58C BHS CHSAA CHSEA CKB EPIC EXCEED FHS FinnTwin GS20K H2000 HCHS hunt KORA_F4 KORA_S3 Korcula LBC1936 MESA_AFA_new MESA_CAU_new MESA_HIS_new NEO NFBC66 NFBC86 orcades PIVUS QBB Raine RS1 RS2 RS3 SAPALDIA_Edinburgh SAPALDIA_Gabriel SHIP-1 SHIP-TREND-0 SHIP-TREND-0_B2 Split Twins_UK UKB_AFR UKB_AMR UKB_EAS UKB_EUR UKB_SAS UKHLS VIKING Vis YFS	0.579634	0.273007	0.459719	0.454432	0.359251	581872	581870	577202	421045	0.5343	0.533	0.5558	0.5638	-0.0082	-0.0124	0.0004	-0.0117	0.0009	0.0011	0.0001	0.0031	3.388e-19	1.101e-30	0.002263	0.0001547	ADAMTSL4(WES), ARNT(PoPs), MCL1(nearest), MRPS21(eQTL), POGZ(eQTL), VPS45(rare_disease)
HAX1	rs6667222	FALSE			1_154253661_A_C	1	154253661	FVC		A	C	0.768	0.232	-5.878	4.15e-09	-+----------+------+---+-++++--+--+-+--+++-----+	ALHS ALSPAC ARIC_AA ARIC_EA B58C BHS CHSAA CHSEA CKB EPIC EXCEED FHS FinnTwin GS20K H2000 HCHS hunt KORA_F4 KORA_S3 Korcula LBC1936 MESA_AFA_new MESA_CAU_new MESA_HIS_new NEO NFBC66 NFBC86 orcades PIVUS Raine RS1 RS2 RS3 SAPALDIA_Edinburgh SAPALDIA_Gabriel SHIP-1 SHIP-TREND-0 SHIP-TREND-0_B2 Split Twins_UK UKB_AFR UKB_EAS UKB_EUR UKB_SAS UKHLS VIKING Vis YFS	0.748135	0.352232	0.941317	0.810121	0.836407	581886	581884	577216	421045	0.7518	0.7524	0.7454	0.7456	-0.004	-0.0076	0.0006	-0.0039	0.0011	0.0013	0.0002	0.0035	0.0004261	1.09e-08	0.0002808	0.2688	ATP8B2(PoPs), HAX1(nearest)
UBE2Q1	rs72698179	FALSE			1_154522394_A_C	1	154522394	FEV1/FVC		A	C	0.0286	0.0286	-6.448	1.13e-10	+-?+--?-?+-++----++--?---+-------+---+--?-?----+?	ALHS ALSPAC ARIC_AA ARIC_EA B58C BHS CHSAA CHSEA CKB EPIC EXCEED FHS FinnTwin GS20K H2000 HCHS hunt KORA_F4 KORA_S3 Korcula LBC1936 MESA_AFA_new MESA_CAU_new MESA_HIS_new NEO NFBC66 NFBC86 orcades PIVUS Raine RS1 RS2 RS3 SAPALDIA_Edinburgh SAPALDIA_Gabriel SHIP-1 SHIP-TREND-0 SHIP-TREND-0_B2 Split Twins_UK UKB_AFR UKB_AMR UKB_EAS UKB_EUR UKB_SAS UKHLS VIKING Vis YFS	0.0290926	0.00372489	0.0076952	0.0219134	0.0163374	495847	495845	491177	420506	0.0293	0.0294	0.0292	0.0286	-0.0115	-0.0001	-0.0028	-0.0321	0.0032	0.0038	0.0004	0.0097	0.0003228	0.9851	7.882e-11	0.000881	ATP8B2(PoPs), MUC1(eQTL), UBE2Q1(nearest)
MUC1	rs2070803	FALSE			1_155157715_A_G	1	155157715	FVC		A	G	0.518	0.482	6.289	3.19e-10	-+-+++-+++++++-++-+++-+-++++-+-++++-+-++-++-++++--	ALHS ALSPAC ARIC_AA ARIC_EA B58C BHS CHSAA CHSEA CKB EPIC EXCEED FHS FinnTwin GS20K H2000 HCHS hunt KORA_F4 KORA_S3 Korcula LBC1936 MESA_AFA_new MESA_CAU_new MESA_HIS_new NEO NFBC66 NFBC86 orcades PIVUS QBB Raine RS1 RS2 RS3 SAPALDIA_Edinburgh SAPALDIA_Gabriel SHIP-1 SHIP-TREND-0 SHIP-TREND-0_B2 Split Twins_UK UKB_AFR UKB_AMR UKB_EAS UKB_EUR UKB_SAS UKHLS VIKING Vis YFS	0.573602	0.605847	0.280822	0.611677	0.505172	581889	581887	577219	421045	0.5181	0.5137	0.5506	0.573	0.0031	0.0066	-0.0004	0.0069	0.0009	0.0011	0.0001	0.0031	0.0009775	1.747e-09	0.002322	0.02559	MUC1(eQTL,nearest), GBA(rare_disease), THBS3(PoPs)
MIR92B;THBS3	rs12411216	FALSE			1_155164480_A_C	1	155164480	FEV1		A	C	0.416	0.416	6.128	8.9e-10	---+++++++-++++++-++--+-++++-++++++++-++-++-++-+--	ALHS ALSPAC ARIC_AA ARIC_EA B58C BHS CHSAA CHSEA CKB EPIC EXCEED FHS FinnTwin GS20K H2000 HCHS hunt KORA_F4 KORA_S3 Korcula LBC1936 MESA_AFA_new MESA_CAU_new MESA_HIS_new NEO NFBC66 NFBC86 orcades PIVUS QBB Raine RS1 RS2 RS3 SAPALDIA_Edinburgh SAPALDIA_Gabriel SHIP-1 SHIP-TREND-0 SHIP-TREND-0_B2 Split Twins_UK UKB_AFR UKB_AMR UKB_EAS UKB_EUR UKB_SAS UKHLS VIKING Vis YFS	0.457973	0.347117	0.241263	0.499632	0.424808	581885	581883	577215	421045	0.4216	0.416	0.4443	0.4489	0.0052	0.0062	0.0003	0.0174	0.0009	0.0011	0.0001	0.0031	3.258e-08	1.476e-08	0.04604	1.589e-08	GBA(rare_disease), GBAP1(eQTL), MIR92B;THBS3(nearest), RP11-307C12.11(eQTL), THBS3(PoPs)
THBS3	rs41264915	TRUE	rs141942982	30804560	1_155167786_A_G	1	155167786	FEV1/FVC	PEF,FF	A	G	0.901	0.099	8.704	3.21e-18	-+++-++-+--+++++----+-+++-+---+--+++--++-+--+-+++-	ALHS ALSPAC ARIC_AA ARIC_EA B58C BHS CHSAA CHSEA CKB EPIC EXCEED FHS FinnTwin GS20K H2000 HCHS hunt KORA_F4 KORA_S3 Korcula LBC1936 MESA_AFA_new MESA_CAU_new MESA_HIS_new NEO NFBC66 NFBC86 orcades PIVUS QBB Raine RS1 RS2 RS3 SAPALDIA_Edinburgh SAPALDIA_Gabriel SHIP-1 SHIP-TREND-0 SHIP-TREND-0_B2 Split Twins_UK UKB_AFR UKB_AMR UKB_EAS UKB_EUR UKB_SAS UKHLS VIKING Vis YFS	0.887524	0.736657	0.96043	0.888115	0.916524	581884	581882	577214	421045	0.8903	0.8908	0.887	0.8865	0.0055	-0.0013	0.0017	0.0263	0.0016	0.0018	0.0002	0.0048	0.0003959	0.4765	4.452e-15	5.589e-08	CHRNB2(eQTL), GBA(rare_disease), MUC1(eQTL), PBXIP1(PoPs), THBS3(nearest), UBE2Q1(eQTL)
FCGR3A	rs71632989	TRUE	rs2099684	DOI: 10.1101/2021.11.19.21266436	1_161533055_G_T	1	161533055	FEV1/FVC		T	G	0.9	0.1	6.841	7.85e-12	++-+++--+++++-+++++--+++-+++-?+-+-++--++--+-++++++	ALHS ALSPAC ARIC_AA ARIC_EA B58C BHS CHSAA CHSEA CKB EPIC EXCEED FHS FinnTwin GS20K H2000 HCHS hunt KORA_F4 KORA_S3 Korcula LBC1936 MESA_AFA_new MESA_CAU_new MESA_HIS_new NEO NFBC66 NFBC86 orcades PIVUS QBB Raine RS1 RS2 RS3 SAPALDIA_Edinburgh SAPALDIA_Gabriel SHIP-1 SHIP-TREND-0 SHIP-TREND-0_B2 Split Twins_UK UKB_AFR UKB_AMR UKB_EAS UKB_EUR UKB_SAS UKHLS VIKING Vis YFS	0.881951	0.992084	0.997341	0.814964	0.943159	568654	568652	563984	419481	0.8806	0.8806	0.8809	0.8816	0.0011	-0.0057	0.0014	0.0101	0.0016	0.0019	0.0002	0.0048	0.4822	0.002476	5.644e-11	0.03576	FCGR3A(rare_disease,nearest), FCGR2A(pQTL), FCGR2B(pQTL), FCGR3B(pQTL), HSPA6(PoPs), HSPA7(eQTL), MPZ(mouse_KO), NDUFS2(rare_disease), RPS23P10(eQTL)
LOC100422212	rs12564153	FALSE			1_163589306_G_T	1	163589306	FEV1		T	G	0.929	0.071	-6.944	3.8e-12	+----+---++++-?---+-++-------++-+-+-+-+--+------+-	ALHS ALSPAC ARIC_AA ARIC_EA B58C BHS CHSAA CHSEA CKB EPIC EXCEED FHS FinnTwin GS20K H2000 HCHS hunt KORA_F4 KORA_S3 Korcula LBC1936 MESA_AFA_new MESA_CAU_new MESA_HIS_new NEO NFBC66 NFBC86 orcades PIVUS QBB Raine RS1 RS2 RS3 SAPALDIA_Edinburgh SAPALDIA_Gabriel SHIP-1 SHIP-TREND-0 SHIP-TREND-0_B2 Split Twins_UK UKB_AFR UKB_AMR UKB_EAS UKB_EUR UKB_SAS UKHLS VIKING Vis YFS	0.936061	0.994944	0.906643	0.916781	0.956789	578096	578094	573426	421045	0.9231	0.9217	0.9295	0.9355	-0.0121	-0.0091	-0.0017	-0.018	0.0018	0.002	0.0003	0.0063	8.663e-12	7.913e-06	4.621e-10	0.004201	LOC100422212(nearest), RGS5(PoPs)
LOC100422212	rs10917848	FALSE			1_163753754_A_C	1	163753754	FEV1/FVC		A	C	0.401	0.401	-6.381	1.77e-10	----+--++-----+++++++------+--++------------+--	ALHS ALSPAC ARIC_AA ARIC_EA B58C BHS CHSAA CHSEA EPIC EXCEED FHS FinnTwin GS20K H2000 HCHS hunt KORA_F4 KORA_S3 Korcula LBC1936 MESA_AFA_new MESA_CAU_new MESA_HIS_new NEO NFBC66 NFBC86 orcades PIVUS Raine RS1 RS2 RS3 SAPALDIA_Edinburgh SAPALDIA_Gabriel SHIP-1 SHIP-TREND-0 SHIP-TREND-0_B2 Split Twins_UK UKB_AFR UKB_AMR UKB_EUR UKB_SAS UKHLS VIKING Vis YFS	0.402443	0.229555	0.691965	0.308796	0.552466	581880	581878	577210	421045	0.4468	0.4539	0.4161	0.3977	-0.0028	-0.0002	-0.0009	-0.0058	0.0009	0.0011	0.0001	0.0031	0.002383	0.845	3.925e-11	0.06407	LOC100422212(nearest), RGS5(PoPs)
PBX1	rs527203	FALSE			1_164350519_A_G	1	164350519	FVC		A	G	0.318	0.318	5.93	3.04e-09	++++++++++++++++++-++--++++--++++-++++---+++++---+	ALHS ALSPAC ARIC_AA ARIC_EA B58C BHS CHSAA CHSEA CKB EPIC EXCEED FHS FinnTwin GS20K H2000 HCHS hunt KORA_F4 KORA_S3 Korcula LBC1936 MESA_AFA_new MESA_CAU_new MESA_HIS_new NEO NFBC66 NFBC86 orcades PIVUS QBB Raine RS1 RS2 RS3 SAPALDIA_Edinburgh SAPALDIA_Gabriel SHIP-1 SHIP-TREND-0 SHIP-TREND-0_B2 Split Twins_UK UKB_AFR UKB_AMR UKB_EAS UKB_EUR UKB_SAS UKHLS VIKING Vis YFS	0.345754	0.188456	0.164183	0.412061	0.232849	581889	581887	577219	421045	0.325	0.3223	0.3379	0.3523	0.0055	0.0074	0.0001	-0.0012	0.001	0.0012	0.0001	0.0032	2.338e-08	1.649e-10	0.6499	0.7003	PBX1(PoPs,nearest)
KIAA0040	rs760486	FALSE			1_175137376_G_T	1	175137376	FEV1		T	G	0.385	0.385	6.698	2.12e-11	+++--++-++-+++++++-++-+++-++++--+++-+--++-+-+-+++-	ALHS ALSPAC ARIC_AA ARIC_EA B58C BHS CHSAA CHSEA CKB EPIC EXCEED FHS FinnTwin GS20K H2000 HCHS hunt KORA_F4 KORA_S3 Korcula LBC1936 MESA_AFA_new MESA_CAU_new MESA_HIS_new NEO NFBC66 NFBC86 orcades PIVUS QBB Raine RS1 RS2 RS3 SAPALDIA_Edinburgh SAPALDIA_Gabriel SHIP-1 SHIP-TREND-0 SHIP-TREND-0_B2 Split Twins_UK UKB_AFR UKB_AMR UKB_EAS UKB_EUR UKB_SAS UKHLS VIKING Vis YFS	0.343456	0.208217	0.546298	0.486142	0.442683	581889	581887	577219	421045	0.4001	0.4022	0.3702	0.3491	0.0056	0.0054	0.0005	0.0133	0.0009	0.0011	0.0001	0.0032	2.042e-09	9.54e-07	0.0001704	3.073e-05	KIAA0040(nearest), RABGAP1L(PoPs)
RFWD2	1:175905060_CTTTT_C	FALSE			1_175905060_C_CTTTT	1	175905060	FEV1/FVC		CTTTT	C	0.634	0.366	-5.875	4.23e-09	??+?????-????????????????????????????????----+????	ALHS ALSPAC ARIC_AA ARIC_EA B58C BHS CHSAA CHSEA CKB EPIC EXCEED FHS FinnTwin GS20K H2000 HCHS hunt KORA_F4 KORA_S3 Korcula LBC1936 MESA_AFA_new MESA_CAU_new MESA_HIS_new NEO NFBC66 NFBC86 orcades PIVUS QBB Raine RS1 RS2 RS3 SAPALDIA_Edinburgh SAPALDIA_Gabriel SHIP-1 SHIP-TREND-0 SHIP-TREND-0_B2 Split Twins_UK UKB_AFR UKB_AMR UKB_EAS UKB_EUR UKB_SAS UKHLS VIKING Vis YFS	0.622974	0.9571	0.62686	0.603484	0.673358	420050	420050	420050	336335	0.632	0.6325	0.6271	0.6244	-0.0034	-0.0005	-0.001	-0.0078	0.0011	0.0013	0.0002	0.0037	0.002017	0.7051	6.871e-10	0.0342	RFWD2(PoPs,nearest), RP11-318C24.2(eQTL)
PAPPA2	rs58090844	FALSE			1_176627864_A_G	1	176627864	FVC		A	G	0.928	0.072	6.02	1.74e-09	-+-+++-+++--+++++---+-+++-----++++--++++---++++-+	ALHS ALSPAC ARIC_AA ARIC_EA B58C BHS CHSAA CHSEA CKB EPIC EXCEED FHS FinnTwin GS20K H2000 HCHS hunt KORA_F4 KORA_S3 Korcula LBC1936 MESA_AFA_new MESA_CAU_new MESA_HIS_new NEO NFBC66 NFBC86 orcades PIVUS Raine RS1 RS2 RS3 SAPALDIA_Edinburgh SAPALDIA_Gabriel SHIP-1 SHIP-TREND-0 SHIP-TREND-0_B2 Split Twins_UK UKB_AFR UKB_AMR UKB_EAS UKB_EUR UKB_SAS UKHLS VIKING Vis YFS	0.931614	0.926395	0.903855	0.931979	0.853234	581889	581887	577219	421045	0.9233	0.9224	0.9279	0.9305	0.0085	0.0121	-0.0005	0.0029	0.0017	0.002	0.0003	0.006	9.171e-07	1.237e-09	0.05694	0.6309	PAPPA2(PoPs,nearest)
PAPPA2	rs138743979	FALSE			1_176756891_T_TG	1	176756891	PEF		T	TG	0.626	0.374	-6.075	1.24e-09	?+??????????????+----?	ALSPAC ARIC_AA B58C EPIC FinnTwin hunt LBC1936 orcades Raine RS1 RS2 RS3 SHIP-1 SHIP-TREND-0 SHIP-TREND-0_B2 Split UKB_AFR UKB_AMR UKB_EAS UKB_EUR UKB_SAS VIKING	0.630894	0.361433	0.920087	0.551041	0.589803	448164	448164	448164	349113	0.648	0.652	0.6325	0.627	0.0006	0.0032	-0.0006	-0.0221	0.0012	0.0014	0.0002	0.0036	0.6261	0.02044	0.0001508	1.253e-09	PAPPA2(PoPs,nearest)
RALGPS2	rs6425501	TRUE	rs4651005	30804560	1_178718536_A_G	1	178718536	FEV1	FEV1,FVC	A	G	0.681	0.319	-7.94	2.02e-15	----+-----+++---+----++--+-----+-----+++--+---+++-	ALHS ALSPAC ARIC_AA ARIC_EA B58C BHS CHSAA CHSEA CKB EPIC EXCEED FHS FinnTwin GS20K H2000 HCHS hunt KORA_F4 KORA_S3 Korcula LBC1936 MESA_AFA_new MESA_CAU_new MESA_HIS_new NEO NFBC66 NFBC86 orcades PIVUS QBB Raine RS1 RS2 RS3 SAPALDIA_Edinburgh SAPALDIA_Gabriel SHIP-1 SHIP-TREND-0 SHIP-TREND-0_B2 Split Twins_UK UKB_AFR UKB_AMR UKB_EAS UKB_EUR UKB_SAS UKHLS VIKING Vis YFS	0.650259	0.474488	0.871157	0.713406	0.817789	581888	581886	577218	421045	0.6707	0.6734	0.6555	0.6549	-0.0078	-0.0082	-0.0004	-0.0078	0.001	0.0012	0.0001	0.0032	5.505e-15	2.54e-12	0.007967	0.01474	ANGPTL1(eQTL,PoPs), RALGPS2(nearest)
LAMC2	rs1047981	FALSE			1_183206573_A_G	1	183206573	FEV1/FVC		A	G	0.218	0.218	-6.274	3.52e-10	+-+--------++-----+-+++-+------++-++-+---+-+----+-	ALHS ALSPAC ARIC_AA ARIC_EA B58C BHS CHSAA CHSEA CKB EPIC EXCEED FHS FinnTwin GS20K H2000 HCHS hunt KORA_F4 KORA_S3 Korcula LBC1936 MESA_AFA_new MESA_CAU_new MESA_HIS_new NEO NFBC66 NFBC86 orcades PIVUS QBB Raine RS1 RS2 RS3 SAPALDIA_Edinburgh SAPALDIA_Gabriel SHIP-1 SHIP-TREND-0 SHIP-TREND-0_B2 Split Twins_UK UKB_AFR UKB_AMR UKB_EAS UKB_EUR UKB_SAS UKHLS VIKING Vis YFS	0.189424	0.540747	0.342094	0.15384	0.314561	581886	581884	577216	421045	0.2396	0.2417	0.2182	0.2006	-0.006	-0.0037	-0.0009	-0.0113	0.0011	0.0013	0.0002	0.0039	3.272e-08	0.003828	3.178e-08	0.003318	LAMC1(PoPs), LAMC2(nearest), NCF2(rare_disease)
NMNAT2	rs1360277	FALSE			1_183314641_A_T	1	183314641	FEV1	FEV1,FVC	A	T	0.624	0.376	-7.466	8.27e-14	----+-++--+-+------+----+----+--++-+-++++------+--	ALHS ALSPAC ARIC_AA ARIC_EA B58C BHS CHSAA CHSEA CKB EPIC EXCEED FHS FinnTwin GS20K H2000 HCHS hunt KORA_F4 KORA_S3 Korcula LBC1936 MESA_AFA_new MESA_CAU_new MESA_HIS_new NEO NFBC66 NFBC86 orcades PIVUS QBB Raine RS1 RS2 RS3 SAPALDIA_Edinburgh SAPALDIA_Gabriel SHIP-1 SHIP-TREND-0 SHIP-TREND-0_B2 Split Twins_UK UKB_AFR UKB_AMR UKB_EAS UKB_EUR UKB_SAS UKHLS VIKING Vis YFS	0.59191	0.267485	0.864943	0.539167	0.662657	581889	581887	577219	421045	0.6116	0.6154	0.5964	0.5808	-0.0068	-0.0072	-0.0003	-0.0124	0.001	0.0011	0.0001	0.0031	1.713e-12	1.76e-10	0.01745	6.756e-05	LAMC1(PoPs), NCF2(rare_disease), NMNAT2(nearest)
HMCN1	rs11586893	FALSE			1_185925802_A_T	1	185925802	FEV1/FVC		A	T	0.221	0.221	-7.028	2.1e-12	-+-+--++-----+-+-+--++-------++--+++---++-----+-+	ALHS ALSPAC ARIC_AA ARIC_EA B58C BHS CHSAA CHSEA CKB EPIC EXCEED FHS FinnTwin GS20K H2000 HCHS hunt KORA_F4 KORA_S3 Korcula LBC1936 MESA_AFA_new MESA_CAU_new MESA_HIS_new NEO NFBC66 NFBC86 orcades PIVUS Raine RS1 RS2 RS3 SAPALDIA_Edinburgh SAPALDIA_Gabriel SHIP-1 SHIP-TREND-0 SHIP-TREND-0_B2 Split Twins_UK UKB_AFR UKB_AMR UKB_EAS UKB_EUR UKB_SAS UKHLS VIKING Vis YFS	0.245946	0.0698924	0.0908142	0.267576	0.246661	581884	581882	577214	421045	0.2346	0.2332	0.2413	0.2411	0.0023	0.0061	-0.0008	-0.0031	0.0011	0.0014	0.0002	0.0036	0.04226	6.083e-06	1.804e-07	0.3941	HMCN1(eQTL,WES,PoPs,nearest), PRG4(eQTL)
MIR548F1	rs6689111	TRUE	rs2146098	30804560	1_186098426_A_T	1	186098426	FVC		A	T	0.397	0.397	7.87	3.54e-15	-++++++-++++++?++++++++--+++-+++++++++-++--++++-+-	ALHS ALSPAC ARIC_AA ARIC_EA B58C BHS CHSAA CHSEA CKB EPIC EXCEED FHS FinnTwin GS20K H2000 HCHS hunt KORA_F4 KORA_S3 Korcula LBC1936 MESA_AFA_new MESA_CAU_new MESA_HIS_new NEO NFBC66 NFBC86 orcades PIVUS QBB Raine RS1 RS2 RS3 SAPALDIA_Edinburgh SAPALDIA_Gabriel SHIP-1 SHIP-TREND-0 SHIP-TREND-0_B2 Split Twins_UK UKB_AFR UKB_AMR UKB_EAS UKB_EUR UKB_SAS UKHLS VIKING Vis YFS	0.34705	0.605368	0.58067	0.376686	0.446471	578098	578096	573428	421045	0.4095	0.4157	0.3798	0.3545	0.0032	0.0078	-0.0009	-0.0033	0.0009	0.0011	0.0001	0.0032	0.0006892	1.209e-12	1.639e-11	0.3084	HMCN1(eQTL,WES,PoPs), MIR548F1(nearest), PRG4(eQTL)
MIR548F1	rs17531405	TRUE	rs17531405	30804560	1_186113852_C_G	1	186113852	FEV1/FVC	PEF,FF	C	G	0.154	0.154	10.743	6.38e-27	+++++++++-++++-+++++--+++++-+++++-+++++++-+-+++++-	ALHS ALSPAC ARIC_AA ARIC_EA B58C BHS CHSAA CHSEA CKB EPIC EXCEED FHS FinnTwin GS20K H2000 HCHS hunt KORA_F4 KORA_S3 Korcula LBC1936 MESA_AFA_new MESA_CAU_new MESA_HIS_new NEO NFBC66 NFBC86 orcades PIVUS QBB Raine RS1 RS2 RS3 SAPALDIA_Edinburgh SAPALDIA_Gabriel SHIP-1 SHIP-TREND-0 SHIP-TREND-0_B2 Split Twins_UK UKB_AFR UKB_AMR UKB_EAS UKB_EUR UKB_SAS UKHLS VIKING Vis YFS	0.180742	0.0128571	0.0172634	0.242823	0.0750806	581887	581885	577217	421045	0.1741	0.1732	0.1777	0.1776	0.0051	-0.0018	0.0018	0.0205	0.0013	0.0015	0.0002	0.004	8.542e-05	0.2432	2.503e-23	3.736e-07	HMCN1(eQTL,WES,PoPs), MIR548F1(nearest), PRG4(eQTL)
MIR548F1	rs1743858	FALSE			1_186209229_G_T	1	186209229	FEV1/FVC		T	G	0.79	0.21	6.326	2.51e-10	-+-+++++++-+++??+++-+?+?+++++-++-+++++++++++++-++	ALHS ALSPAC ARIC_AA ARIC_EA B58C BHS CHSAA CHSEA CKB EPIC EXCEED FHS FinnTwin GS20K H2000 HCHS hunt KORA_F4 KORA_S3 Korcula LBC1936 MESA_AFA_new MESA_CAU_new MESA_HIS_new NEO NFBC66 NFBC86 orcades PIVUS Raine RS1 RS2 RS3 SAPALDIA_Edinburgh SAPALDIA_Gabriel SHIP-1 SHIP-TREND-0 SHIP-TREND-0_B2 Split Twins_UK UKB_AFR UKB_AMR UKB_EAS UKB_EUR UKB_SAS UKHLS VIKING Vis YFS	0.776201	0.964703	0.877956	0.885369	0.804912	565318	565316	560648	408267	0.7894	0.7908	0.7804	0.7791	0.0021	-0.0025	0.0012	0.0129	0.0012	0.0014	0.0002	0.0037	0.06496	0.06963	1.368e-12	0.0005567	HMCN1(eQTL,WES,PoPs), MIR548F1(nearest), PRG4(eQTL)
CFH	rs7514261	FALSE			1_196700914_A_G	1	196700914	FVC		A	G	0.415	0.415	-6.229	4.69e-10	-++-+++---?++----+-----+----+-+-+-+--+-----+---+++	ALHS ALSPAC ARIC_AA ARIC_EA B58C BHS CHSAA CHSEA CKB EPIC EXCEED FHS FinnTwin GS20K H2000 HCHS hunt KORA_F4 KORA_S3 Korcula LBC1936 MESA_AFA_new MESA_CAU_new MESA_HIS_new NEO NFBC66 NFBC86 orcades PIVUS QBB Raine RS1 RS2 RS3 SAPALDIA_Edinburgh SAPALDIA_Gabriel SHIP-1 SHIP-TREND-0 SHIP-TREND-0_B2 Split Twins_UK UKB_AFR UKB_AMR UKB_EAS UKB_EUR UKB_SAS UKHLS VIKING Vis YFS	0.402867	0.476537	0.438328	0.4932	0.549418	581888	581886	577218	421045	0.4176	0.4186	0.4122	0.4056	-0.0027	-0.0056	0.0006	-0.0003	0.0009	0.0011	0.0001	0.0031	0.002821	1.324e-07	1.937e-05	0.9349	CFH(eQTL,pQTL,rare_disease,nearest), KCNT2(PoPs)
LINC01222	rs1892433	TRUE	rs10919604	30804560	1_198961568_A_G	1	198961568	FEV1/FVC		A	G	0.445	0.445	-9.652	4.82e-22	-----------------+-+-+-+----------+-------+----+-+	ALHS ALSPAC ARIC_AA ARIC_EA B58C BHS CHSAA CHSEA CKB EPIC EXCEED FHS FinnTwin GS20K H2000 HCHS hunt KORA_F4 KORA_S3 Korcula LBC1936 MESA_AFA_new MESA_CAU_new MESA_HIS_new NEO NFBC66 NFBC86 orcades PIVUS QBB Raine RS1 RS2 RS3 SAPALDIA_Edinburgh SAPALDIA_Gabriel SHIP-1 SHIP-TREND-0 SHIP-TREND-0_B2 Split Twins_UK UKB_AFR UKB_AMR UKB_EAS UKB_EUR UKB_SAS UKHLS VIKING Vis YFS	0.388711	0.381999	0.719197	0.515035	0.685029	581877	581875	577207	421045	0.4499	0.4574	0.4148	0.392	-0.0039	0.0008	-0.0013	-0.0167	0.0009	0.0011	0.0001	0.0032	3.564e-05	0.4814	4.196e-20	1.073e-07	PTPRC(rare_disease,PoPs), LINC01222(nearest)
NR5A2	rs2502136	FALSE			1_199706430_C_T	1	199706430	FVC	FEV1,FVC	T	C	0.461	0.461	-7.202	5.93e-13	+-+----+---++----+++--+---+--------+-+--++---+-+	ALHS ALSPAC ARIC_AA ARIC_EA B58C BHS CHSAA CHSEA CKB EPIC FHS FinnTwin GS20K H2000 HCHS hunt KORA_F4 KORA_S3 Korcula LBC1936 MESA_AFA_new MESA_CAU_new MESA_HIS_new NEO NFBC66 NFBC86 orcades PIVUS Raine RS1 RS2 RS3 SAPALDIA_Edinburgh SAPALDIA_Gabriel SHIP-1 SHIP-TREND-0 SHIP-TREND-0_B2 Split Twins_UK UKB_AFR UKB_AMR UKB_EAS UKB_EUR UKB_SAS UKHLS VIKING Vis YFS	0.468473	0.448808	0.38571	0.478655	0.487805	581869	581867	577199	421045	0.4582	0.4566	0.4642	0.4725	-0.0053	-0.0073	0	-0.0066	0.0009	0.0011	0.0001	0.0031	5.094e-09	9.245e-12	0.9013	0.03123	NR5A2(PoPs,nearest)
NR5A2	rs2821334	TRUE	rs2821332	30061609	1_200093887_G_T	1	200093887	FVC		T	G	0.484	0.484	7.629	2.36e-14	-+-++-++++?-++++++--++++++++-+++++++++-+-++++---+-	ALHS ALSPAC ARIC_AA ARIC_EA B58C BHS CHSAA CHSEA CKB EPIC EXCEED FHS FinnTwin GS20K H2000 HCHS hunt KORA_F4 KORA_S3 Korcula LBC1936 MESA_AFA_new MESA_CAU_new MESA_HIS_new NEO NFBC66 NFBC86 orcades PIVUS QBB Raine RS1 RS2 RS3 SAPALDIA_Edinburgh SAPALDIA_Gabriel SHIP-1 SHIP-TREND-0 SHIP-TREND-0_B2 Split Twins_UK UKB_AFR UKB_AMR UKB_EAS UKB_EUR UKB_SAS UKHLS VIKING Vis YFS	0.444729	0.456635	0.659548	0.40442	0.513243	581887	581885	577217	421045	0.4889	0.4946	0.4603	0.4423	0.005	0.0079	-0.0003	0.0076	0.0009	0.0011	0.0001	0.0031	7.323e-08	1.528e-13	0.05985	0.01295	NR5A2(PoPs,nearest)
CACNA1S	rs3850625	FALSE			1_201016296_A_G	1	201016296	FVC		A	G	0.108	0.108	-6.186	6.16e-10	--+-+--+-++---------+-+---+------+-++-++--------	ALHS ALSPAC ARIC_AA ARIC_EA B58C BHS CHSAA CHSEA CKB EPIC FHS FinnTwin GS20K H2000 HCHS hunt KORA_F4 KORA_S3 Korcula LBC1936 MESA_AFA_new MESA_CAU_new MESA_HIS_new NEO NFBC66 NFBC86 orcades PIVUS Raine RS1 RS2 RS3 SAPALDIA_Edinburgh SAPALDIA_Gabriel SHIP-1 SHIP-TREND-0 SHIP-TREND-0_B2 Split Twins_UK UKB_AFR UKB_AMR UKB_EAS UKB_EUR UKB_SAS UKHLS VIKING Vis YFS	0.118162	0.00887154	0.044757	0.0877412	0.214403	581889	581887	577219	421045	0.1136	0.113	0.1179	0.1173	-0.0066	-0.01	0.0004	-0.0093	0.0015	0.0018	0.0002	0.0048	9.661e-06	1.364e-08	0.04227	0.05115	CACNA1S(credible,nearest), CAMSAP2(PoPs)
PHLDA3	rs10920205	FALSE			1_201422201_A_G	1	201422201	FEV1/FVC		A	G	0.577	0.423	-8.014	1.11e-15	---------++--------+-+--+--++-----+-----+-----+--	ALHS ALSPAC ARIC_AA ARIC_EA B58C BHS CHSAA CHSEA CKB EPIC EXCEED FHS FinnTwin GS20K H2000 HCHS hunt KORA_F4 KORA_S3 Korcula LBC1936 MESA_AFA_new MESA_CAU_new MESA_HIS_new NEO NFBC66 NFBC86 orcades PIVUS Raine RS1 RS2 RS3 SAPALDIA_Edinburgh SAPALDIA_Gabriel SHIP-1 SHIP-TREND-0 SHIP-TREND-0_B2 Split Twins_UK UKB_AFR UKB_AMR UKB_EAS UKB_EUR UKB_SAS UKHLS VIKING Vis YFS	0.639794	0.353769	0.206879	0.566333	0.322424	581889	581887	577219	421045	0.5653	0.5593	0.6059	0.6206	-0.0016	0.0023	-0.001	-0.0105	0.001	0.0011	0.0001	0.0032	0.09116	0.04634	4.706e-14	0.0009171	CSRP1(PoPs), PHLDA3(nearest)
IPO9-AS1	rs10920254	TRUE	rs4309038	30804560	1_201767474_C_G	1	201767474	FEV1/FVC		C	G	0.351	0.351	6.649	2.95e-11	-++++-++++--++-++-+++-+++++++-+-++++--++++-++++++	ALHS ALSPAC ARIC_AA ARIC_EA B58C BHS CHSAA CHSEA CKB EPIC EXCEED FHS FinnTwin GS20K H2000 HCHS hunt KORA_F4 KORA_S3 Korcula LBC1936 MESA_AFA_new MESA_CAU_new MESA_HIS_new NEO NFBC66 NFBC86 orcades PIVUS Raine RS1 RS2 RS3 SAPALDIA_Edinburgh SAPALDIA_Gabriel SHIP-1 SHIP-TREND-0 SHIP-TREND-0_B2 Split Twins_UK UKB_AFR UKB_AMR UKB_EAS UKB_EUR UKB_SAS UKHLS VIKING Vis YFS	0.347102	0.784068	0.350183	0.421991	0.331757	581885	581883	577215	421045	0.3517	0.3507	0.3539	0.3608	0.0036	0.001	0.0009	0.0142	0.001	0.0011	0.0001	0.0032	0.0001444	0.376	9.6e-10	9.49e-06	IPO9-AS1(nearest), LMOD1(PoPs)
PIK3C2B	rs1008833	TRUE	rs12092943	30061609	1_204426295_A_G	1	204426295	FEV1	FEV1,FVC	A	G	0.824	0.176	-9.759	1.69e-22	--+---+-----------+-++-+-+----+------+----+----+++	ALHS ALSPAC ARIC_AA ARIC_EA B58C BHS CHSAA CHSEA CKB EPIC EXCEED FHS FinnTwin GS20K H2000 HCHS hunt KORA_F4 KORA_S3 Korcula LBC1936 MESA_AFA_new MESA_CAU_new MESA_HIS_new NEO NFBC66 NFBC86 orcades PIVUS QBB Raine RS1 RS2 RS3 SAPALDIA_Edinburgh SAPALDIA_Gabriel SHIP-1 SHIP-TREND-0 SHIP-TREND-0_B2 Split Twins_UK UKB_AFR UKB_AMR UKB_EAS UKB_EUR UKB_SAS UKHLS VIKING Vis YFS	0.856067	0.966758	0.609103	0.874375	0.771979	581889	581887	577219	421045	0.7864	0.783	0.8235	0.8551	-0.0111	-0.0124	-0.0005	-0.0374	0.0012	0.0014	0.0002	0.0044	1.836e-20	6.908e-19	0.004535	1.125e-17	PIK3C2B(PoPs,nearest)
CNTN2	rs1572995	FALSE			1_205024012_C_T	1	205024012	FEV1/FVC		T	C	0.89	0.11	7.908	2.62e-15	+--+++-++++--+++---+-++-++-++-+---+++++++++++++---	ALHS ALSPAC ARIC_AA ARIC_EA B58C BHS CHSAA CHSEA CKB EPIC EXCEED FHS FinnTwin GS20K H2000 HCHS hunt KORA_F4 KORA_S3 Korcula LBC1936 MESA_AFA_new MESA_CAU_new MESA_HIS_new NEO NFBC66 NFBC86 orcades PIVUS QBB Raine RS1 RS2 RS3 SAPALDIA_Edinburgh SAPALDIA_Gabriel SHIP-1 SHIP-TREND-0 SHIP-TREND-0_B2 Split Twins_UK UKB_AFR UKB_AMR UKB_EAS UKB_EUR UKB_SAS UKHLS VIKING Vis YFS	0.870429	0.963171	0.994116	0.867098	0.871728	581888	581886	577218	421045	0.8716	0.8715	0.871	0.8625	-0.0006	-0.007	0.0016	0.0092	0.0015	0.0018	0.0002	0.0046	0.6645	7.309e-05	3.621e-14	0.044	CNTN2(eQTL,nearest), TMCC2(PoPs)
NUCKS1	rs3747973	FALSE			1_205677148_A_G	1	205677148	FVC		A	G	0.418	0.418	-7.527	5.2e-14	+-----++---------+++----++---+---+-----+?-----++	ALHS ALSPAC ARIC_AA ARIC_EA B58C BHS CHSAA CHSEA CKB EPIC FHS FinnTwin GS20K H2000 HCHS hunt KORA_F4 KORA_S3 Korcula LBC1936 MESA_AFA_new MESA_CAU_new MESA_HIS_new NEO NFBC66 NFBC86 orcades PIVUS Raine RS1 RS2 RS3 SAPALDIA_Edinburgh SAPALDIA_Gabriel SHIP-1 SHIP-TREND-0 SHIP-TREND-0_B2 Split Twins_UK UKB_AFR UKB_AMR UKB_EAS UKB_EUR UKB_SAS UKHLS VIKING Vis YFS	0.407378	0.821898	0.460767	0.341673	0.438473	581885	581883	577215	421045	0.4203	0.4213	0.4164	0.421	-0.0043	-0.0077	0.0007	0.0158	0.0009	0.0011	0.0001	0.0031	2.973e-06	6.771e-13	2.516e-07	3.933e-07	NUCKS1(eQTL,PoPs,nearest), RAB7L1(eQTL)
SLC26A9	rs7555534	FALSE			1_205908867_C_T	1	205908867	FEV1/FVC		T	C	0.641	0.359	7.427	1.11e-13	++++-++++++-++--++-+++++-+++-+-+--+-+++-+++++-+	ALHS ALSPAC ARIC_AA ARIC_EA B58C BHS CHSAA CHSEA EPIC EXCEED FHS FinnTwin GS20K H2000 HCHS hunt KORA_F4 KORA_S3 Korcula LBC1936 MESA_AFA_new MESA_CAU_new MESA_HIS_new NEO NFBC66 NFBC86 orcades PIVUS Raine RS1 RS2 RS3 SAPALDIA_Edinburgh SAPALDIA_Gabriel SHIP-1 SHIP-TREND-0 SHIP-TREND-0_B2 Split Twins_UK UKB_AFR UKB_AMR UKB_EUR UKB_SAS UKHLS VIKING Vis YFS	0.630656	0.898155	0.949488	0.708899	0.87178	581889	581887	577219	421045	0.6553	0.6568	0.6435	0.6317	0.0014	-0.0027	0.001	0.0536	0.001	0.0012	0.0001	0.0032	0.1789	0.0268	9.034e-12	4.718e-63	FAM72A(eQTL), RP11-534L20.5(eQTL), SLC26A9(nearest), SLC41A1(PoPs), SRGAP2(eQTL)
SLC26A9	rs1342062	FALSE			1_205912786_G_T	1	205912786	PEF		T	G	0.679	0.321	18.19	6.21e-74	++++-+++-+++++++++++++	ALSPAC ARIC_AA B58C EPIC FinnTwin hunt LBC1936 orcades Raine RS1 RS2 RS3 SHIP-1 SHIP-TREND-0 SHIP-TREND-0_B2 Split UKB_AFR UKB_AMR UKB_EAS UKB_EUR UKB_SAS VIKING	0.673282	0.834577	0.951457	0.737211	0.857735	581887	581885	577217	421045	0.6943	0.6957	0.6844	0.6727	0.0015	-0.0024	0.001	0.0588	0.0011	0.0013	0.0001	0.0033	0.1577	0.05552	1.787e-10	3.637e-69	SLC26A9(credible,nearest), RAB7L1(eQTL), SLC41A1(PoPs)
C4BPA	rs7516060	FALSE			1_207383908_A_G	1	207383908	FEV1	FEV1,FVC	A	G	0.606	0.394	5.96	2.53e-09	---+-++-+++++++-+-+++++----+-?++++++++++---++++-+-	ALHS ALSPAC ARIC_AA ARIC_EA B58C BHS CHSAA CHSEA CKB EPIC EXCEED FHS FinnTwin GS20K H2000 HCHS hunt KORA_F4 KORA_S3 Korcula LBC1936 MESA_AFA_new MESA_CAU_new MESA_HIS_new NEO NFBC66 NFBC86 orcades PIVUS QBB Raine RS1 RS2 RS3 SAPALDIA_Edinburgh SAPALDIA_Gabriel SHIP-1 SHIP-TREND-0 SHIP-TREND-0_B2 Split Twins_UK UKB_AFR UKB_AMR UKB_EAS UKB_EUR UKB_SAS UKHLS VIKING Vis YFS	0.636387	0.594502	0.413308	0.80943	0.556089	570319	570317	565649	421045	0.5971	0.592	0.6202	0.6277	0.0054	0.0056	0.0003	0.0113	0.0009	0.0011	0.0001	0.0032	9.457e-09	3.454e-07	0.03049	0.000381	C4BPA(nearest), CD55(eQTL), CR1(eQTL), CR2(rare_disease), YOD1(PoPs)
KCNK2	rs555520	TRUE	rs512597	30061609	1_215120407_C_G	1	215120407	FVC	FEV1,FVC	C	G	0.618	0.382	-8.294	1.1e-16	----------?--++--++-+-++--+--+--+---+-+---+-------	ALHS ALSPAC ARIC_AA ARIC_EA B58C BHS CHSAA CHSEA CKB EPIC EXCEED FHS FinnTwin GS20K H2000 HCHS hunt KORA_F4 KORA_S3 Korcula LBC1936 MESA_AFA_new MESA_CAU_new MESA_HIS_new NEO NFBC66 NFBC86 orcades PIVUS QBB Raine RS1 RS2 RS3 SAPALDIA_Edinburgh SAPALDIA_Gabriel SHIP-1 SHIP-TREND-0 SHIP-TREND-0_B2 Split Twins_UK UKB_AFR UKB_AMR UKB_EAS UKB_EUR UKB_SAS UKHLS VIKING Vis YFS	0.659893	0.536906	0.430946	0.573981	0.404918	581834	581832	577164	421045	0.6021	0.5966	0.6315	0.6421	-0.0064	-0.0086	0.0002	-0.0053	0.0009	0.0011	0.0001	0.0032	1.037e-11	5.271e-15	0.2472	0.1031	KCNK2(PoPs,nearest), ENSG00000274895(eQTL)
KCNK2	rs112080577	FALSE			1_215307453_G_GA	1	215307453	FVC		G	GA	0.241	0.241	-5.95	2.68e-09	??-?????-??????????????????????????????-----????	ALHS ALSPAC ARIC_AA ARIC_EA B58C BHS CHSAA CHSEA CKB EPIC FHS FinnTwin GS20K H2000 HCHS hunt KORA_F4 KORA_S3 Korcula LBC1936 MESA_AFA_new MESA_CAU_new MESA_HIS_new NEO NFBC66 NFBC86 orcades PIVUS Raine RS1 RS2 RS3 SAPALDIA_Edinburgh SAPALDIA_Gabriel SHIP-1 SHIP-TREND-0 SHIP-TREND-0_B2 Split Twins_UK UKB_AFR UKB_AMR UKB_EAS UKB_EUR UKB_SAS UKHLS VIKING Vis YFS	0.217352	0.238413	0.378049	0.308817	0.460152	431596	431596	431596	336335	0.2659	0.2682	0.2402	0.2241	-0.0058	-0.0084	0.0001	-0.01	0.0012	0.0014	0.0002	0.0043	2.608e-06	7.175e-09	0.6942	0.0201	KCNK2(PoPs,nearest)
ESRRG	rs34063124	FALSE			1_217010017_C_CA	1	217010017	FEV1/FVC		CA	C	0.231	0.231	-6.32	2.61e-10	?????????--?????????????????-??	ALHS ALSPAC ARIC_EA B58C BHS EPIC EXCEED FHS GS20K H2000 hunt Korcula LBC1936 MESA_CAU_new NEO NFBC66 NFBC86 orcades PIVUS Raine RS1 RS2 RS3 SAPALDIA_Edinburgh SAPALDIA_Gabriel SHIP-1 SHIP-TREND-0 SHIP-TREND-0_B2 UKB_EUR UKHLS VIKING	0.230372	0.287833	0.150008	0.229462	0.20574	464518	464518	464518	365467	0.2203	0.2188	0.2293	0.2338	-0.0052	-0.0017	-0.0012	-0.0137	0.0013	0.0015	0.0002	0.0041	2.93e-05	0.2388	1.454e-12	0.000815	ESRRG(PoPs,nearest)
TGFB2	rs6658835	FALSE			1_218520995_A_G	1	218520995	FEV1/FVC	FVC,FF	A	G	0.715	0.285	11.314	1.12e-29	++++++++++++++++++++-+++++++--+++++-++++++++++-++	ALHS ALSPAC ARIC_AA ARIC_EA B58C BHS CHSAA CHSEA CKB EPIC EXCEED FHS FinnTwin GS20K H2000 HCHS hunt KORA_F4 KORA_S3 Korcula LBC1936 MESA_AFA_new MESA_CAU_new MESA_HIS_new NEO NFBC66 NFBC86 orcades PIVUS Raine RS1 RS2 RS3 SAPALDIA_Edinburgh SAPALDIA_Gabriel SHIP-1 SHIP-TREND-0 SHIP-TREND-0_B2 Split Twins_UK UKB_AFR UKB_AMR UKB_EAS UKB_EUR UKB_SAS UKHLS VIKING Vis YFS	0.731524	0.298491	0.624382	0.673958	0.659497	581885	581883	577215	421045	0.7029	0.7011	0.7131	0.7246	-0.0022	-0.009	0.0015	0.0079	0.001	0.0012	0.0001	0.0034	0.02721	1.142e-14	1.286e-25	0.02107	TGFB2(WES,PoPs,nearest)
TGFB2	rs2799098	TRUE	rs2799098	30804560	1_218521609_A_G	1	218521609	FEV1/FVC		A	G	0.821	0.179	-7.873	3.47e-15	--+---+------+--+--------------	ALHS ALSPAC ARIC_EA B58C BHS EPIC EXCEED FHS GS20K H2000 hunt Korcula LBC1936 MESA_CAU_new NEO NFBC66 NFBC86 orcades PIVUS Raine RS1 RS2 RS3 SAPALDIA_Edinburgh SAPALDIA_Gabriel SHIP-1 SHIP-TREND-0 SHIP-TREND-0_B2 UKB_EUR UKHLS VIKING	0.822363	0.953277	0.811701	0.777162	0.692974	581875	581873	577205	421045	0.8088	0.8083	0.8149	0.8119	-0.0007	0.006	-0.0018	-0.0104	0.0012	0.0014	0.0002	0.004	0.5498	1.117e-05	1.193e-24	0.009537	TGFB2(WES,PoPs,nearest), RRP15(eQTL)
TGFB2	rs12048049	TRUE	rs4846480	24621683	1_218597297_C_G	1	218597297	FEV1	PEF,FEV1	C	G	0.655	0.345	-8.635	5.85e-18	------+-----+----++---+----+++-----+-+++--+-+--+-	ALHS ALSPAC ARIC_AA ARIC_EA B58C BHS CHSAA CHSEA CKB EPIC EXCEED FHS FinnTwin GS20K H2000 HCHS hunt KORA_F4 KORA_S3 Korcula LBC1936 MESA_AFA_new MESA_CAU_new MESA_HIS_new NEO NFBC66 NFBC86 orcades PIVUS Raine RS1 RS2 RS3 SAPALDIA_Edinburgh SAPALDIA_Gabriel SHIP-1 SHIP-TREND-0 SHIP-TREND-0_B2 Split Twins_UK UKB_AFR UKB_AMR UKB_EAS UKB_EUR UKB_SAS UKHLS VIKING Vis YFS	0.713207	0.5142	0.295974	0.680389	0.645816	581889	581887	577219	421045	0.6255	0.6142	0.676	0.7048	-0.0074	-0.0072	-0.0006	-0.0209	0.001	0.0012	0.0001	0.0034	9.542e-14	4.92e-10	3.786e-05	5.109e-10	TGFB2(eQTL,WES,PoPs,nearest)
TGFB2	rs10482810	FALSE			1_218607532_C_G	1	218607532	FEV1/FVC		C	G	0.0065	0.0065	-7.757	8.67e-15	-+---?--+?--?-??--+?++--++--------???-?--??	ALHS ALSPAC ARIC_EA B58C BHS CHSEA EPIC EXCEED FHS FinnTwin GS20K H2000 HCHS hunt KORA_F4 KORA_S3 Korcula LBC1936 MESA_CAU_new MESA_HIS_new NEO NFBC66 NFBC86 orcades PIVUS Raine RS1 RS2 RS3 SAPALDIA_Edinburgh SAPALDIA_Gabriel SHIP-1 SHIP-TREND-0 SHIP-TREND-0_B2 Split Twins_UK UKB_AMR UKB_EUR UKB_SAS UKHLS VIKING Vis YFS	0.00664419	0	0.000319693	0.00303788	0.000702576	449178	449175	444509	400309	0.0065	0.0065	0.0066	0.0065	-0.0052	0.0295	-0.0077	-0.0446	0.0067	0.0079	0.0009	0.0195	0.442	0.0002009	1.148e-17	0.02216	TGFB2(WES,PoPs,credible,nearest)
MIR548F3	rs3009947	FALSE			1_218689155_C_T	1	218689155	FEV1/FVC		T	C	0.496	0.496	6.003	1.93e-09	-++	H2000 hunt UKB_EUR	0.495925	0.556764	0.746542	0.508929	0.586975	581889	581887	577219	421045	0.5362	0.5425	0.5147	0.5069	0.0064	0.0046	0.0009	0.0176	0.0009	0.0011	0.0001	0.0031	7.151e-12	2.049e-05	4.13e-12	9.055e-09	TGFB2(WES,PoPs), MIR548F3(nearest)
MIR548F3	rs559008623	FALSE			1_218706189_A_C	1	218706189	FVC		A	C	0.984	0.016	-5.942	2.81e-09	++--+------?-??-++?+---+--++++++---?---	ALHS ALSPAC ARIC_EA B58C BHS CHSEA EPIC FHS FinnTwin GS20K H2000 HCHS hunt KORA_F4 KORA_S3 Korcula LBC1936 MESA_CAU_new MESA_HIS_new NEO NFBC66 NFBC86 orcades PIVUS Raine RS1 RS2 RS3 SAPALDIA_Edinburgh SAPALDIA_Gabriel SHIP-1 SHIP-TREND-0 SHIP-TREND-0_B2 Split Twins_UK UKB_AMR UKB_EUR UKHLS VIKING	0.983841	0.998367	0.998834	0.98328	0.994006	494372	494369	489703	418573	0.9835	0.9836	0.9837	0.9839	-0.0127	-0.0246	0.0023	-0.0173	0.0041	0.0049	0.0006	0.0125	0.002042	4.4e-07	5.168e-05	0.1669	TGFB2(eQTL,WES,PoPs), MIR548F3(nearest)
MIR548F3	rs62817	FALSE			1_218746863_C_G	1	218746863	FEV1/FVC		C	G	0.441	0.441	-8.205	2.3e-16	-+--++-+++--+-+------+--+-++-+-+---+----++-	ALHS ALSPAC ARIC_EA B58C BHS CHSEA EPIC EXCEED FHS FinnTwin GS20K H2000 HCHS hunt KORA_F4 KORA_S3 Korcula LBC1936 MESA_CAU_new MESA_HIS_new NEO NFBC66 NFBC86 orcades PIVUS Raine RS1 RS2 RS3 SAPALDIA_Edinburgh SAPALDIA_Gabriel SHIP-1 SHIP-TREND-0 SHIP-TREND-0_B2 Split Twins_UK UKB_AMR UKB_EUR UKB_SAS UKHLS VIKING Vis YFS	0.447231	0.0342513	0.40283	0.33785	0.305461	581860	581858	577190	421045	0.4248	0.4235	0.4331	0.4365	0.0008	0.005	-0.0011	-0.0032	0.0009	0.0011	0.0001	0.0031	0.3657	3.641e-06	1.229e-15	0.2984	TGFB2(WES,PoPs), MIR548F3(nearest)
MIR548F3	rs28459747	FALSE			1_218763810_A_G	1	218763810	FEV1/FVC		A	G	0.881	0.119	-7.044	1.87e-12	+-------++-+-+-----++-----++--+	ALHS ALSPAC ARIC_EA B58C BHS EPIC EXCEED FHS GS20K H2000 hunt Korcula LBC1936 MESA_CAU_new NEO NFBC66 NFBC86 orcades PIVUS Raine RS1 RS2 RS3 SAPALDIA_Edinburgh SAPALDIA_Gabriel SHIP-1 SHIP-TREND-0 SHIP-TREND-0_B2 UKB_EUR UKHLS VIKING	0.881647	0.988239	0.970509	0.904296	0.88506	581854	581852	577184	421045	0.8855	0.8858	0.8828	0.8836	-0.0003	0.0061	-0.0015	-0.007	0.0016	0.0018	0.0002	0.0048	0.834	0.0009769	8.088e-12	0.1497	TGFB2(WES,PoPs), MIR548F3(nearest)
MIR548F3	rs17048367	FALSE			1_218833890_A_G	1	218833890	FEV1/FVC		A	G	0.411	0.411	-5.979	2.25e-09	---	H2000 hunt UKB_EUR	0.411121	0.688905	0.494246	0.471229	0.517096	581853	581851	577183	421045	0.4308	0.4317	0.4236	0.4263	-0.0029	0.0004	-0.001	-0.0101	0.0009	0.0011	0.0001	0.0031	0.001352	0.6816	2.511e-14	0.00117	TGFB2(WES,PoPs), MIR548F3(nearest)
MIR548F3	rs28736888	TRUE	rs993925	21946350	1_218857609_C_T	1	218857609	FEV1	FEV1,FVC	T	C	0.491	0.491	10.573	3.96e-26	++++++++++-++++++++----+++-+++-+-++++--+++-++++-+-	ALHS ALSPAC ARIC_AA ARIC_EA B58C BHS CHSAA CHSEA CKB EPIC EXCEED FHS FinnTwin GS20K H2000 HCHS hunt KORA_F4 KORA_S3 Korcula LBC1936 MESA_AFA_new MESA_CAU_new MESA_HIS_new NEO NFBC66 NFBC86 orcades PIVUS QBB Raine RS1 RS2 RS3 SAPALDIA_Edinburgh SAPALDIA_Gabriel SHIP-1 SHIP-TREND-0 SHIP-TREND-0_B2 Split Twins_UK UKB_AFR UKB_AMR UKB_EAS UKB_EUR UKB_SAS UKHLS VIKING Vis YFS	0.481081	0.422609	0.555556	0.405191	0.474627	581883	581881	577213	421045	0.4951	0.4961	0.4835	0.4748	0.0092	0.0094	0.0005	0.0083	0.0009	0.0011	0.0001	0.0031	3.521e-24	1.086e-18	0.0001366	0.006648	TGFB2(WES,PoPs), MIR548F3(nearest)
LYPLAL1-AS1	rs61821643	FALSE			1_219268532_C_T	1	219268532	FVC		T	C	0.975	0.025	6.463	1.03e-10	++?+++?+?++-++++--++?----+---+++-+-++--?-?+?+-??	ALHS ALSPAC ARIC_AA ARIC_EA B58C BHS CHSAA CHSEA CKB EPIC FHS FinnTwin GS20K H2000 HCHS hunt KORA_F4 KORA_S3 Korcula LBC1936 MESA_AFA_new MESA_CAU_new MESA_HIS_new NEO NFBC66 NFBC86 orcades PIVUS Raine RS1 RS2 RS3 SAPALDIA_Edinburgh SAPALDIA_Gabriel SHIP-1 SHIP-TREND-0 SHIP-TREND-0_B2 Split Twins_UK UKB_AFR UKB_AMR UKB_EAS UKB_EUR UKB_SAS UKHLS VIKING Vis YFS	0.973661	0.998216	0.998992	0.995567	0.997022	480904	480902	476234	418034	0.9742	0.9742	0.9741	0.9745	0.0177	0.0285	-0.0009	0.011	0.0036	0.0042	0.0005	0.0106	6.995e-07	1.749e-11	0.04808	0.2985	LYPLAL1(PoPs), LYPLAL1-AS1(nearest)
LYPLAL1	rs75128958	TRUE	rs75128958	30804560	1_219483218_A_G	1	219483218	FEV1/FVC		A	G	0.0762	0.0762	-10.604	2.86e-26	+-?---?-?-+-+------+-?------++-+--+----+?+?-----+	ALHS ALSPAC ARIC_AA ARIC_EA B58C BHS CHSAA CHSEA CKB EPIC EXCEED FHS FinnTwin GS20K H2000 HCHS hunt KORA_F4 KORA_S3 Korcula LBC1936 MESA_AFA_new MESA_CAU_new MESA_HIS_new NEO NFBC66 NFBC86 orcades PIVUS Raine RS1 RS2 RS3 SAPALDIA_Edinburgh SAPALDIA_Gabriel SHIP-1 SHIP-TREND-0 SHIP-TREND-0_B2 Split Twins_UK UKB_AFR UKB_AMR UKB_EAS UKB_EUR UKB_SAS UKHLS VIKING Vis YFS	0.0766772	0.00371004	0.00239206	0.0828687	0.0862924	580325	580323	575655	419481	0.0764	0.0765	0.077	0.0752	-0.0035	0.0066	-0.0025	-0.0123	0.0019	0.0022	0.0003	0.0058	0.06813	0.003058	1.046e-21	0.03452	LYPLAL1(PoPs,nearest)
RNU5F-1	rs12134534	TRUE	rs4328080	26635082	1_219926009_C_T	1	219926009	FEV1/FVC		T	C	0.469	0.469	-11.631	2.87e-31	--+----+--+---+------++-----------+++----+--------	ALHS ALSPAC ARIC_AA ARIC_EA B58C BHS CHSAA CHSEA CKB EPIC EXCEED FHS FinnTwin GS20K H2000 HCHS hunt KORA_F4 KORA_S3 Korcula LBC1936 MESA_AFA_new MESA_CAU_new MESA_HIS_new NEO NFBC66 NFBC86 orcades PIVUS QBB Raine RS1 RS2 RS3 SAPALDIA_Edinburgh SAPALDIA_Gabriel SHIP-1 SHIP-TREND-0 SHIP-TREND-0_B2 Split Twins_UK UKB_AFR UKB_AMR UKB_EAS UKB_EUR UKB_SAS UKHLS VIKING Vis YFS	0.406143	0.732442	0.711065	0.507683	0.490824	581886	581884	577216	421045	0.4731	0.4768	0.4378	0.4222	-0.0018	0.0035	-0.0015	-0.0058	0.0009	0.0011	0.0001	0.0031	0.06054	0.001273	2.673e-28	0.06205	EPRS(PoPs), EPRS1(mouse_KO), RNU5F-1(nearest)
HLX-AS1	1:221051333_GA_G	FALSE			1_221051333_G_GA	1	221051333	FEV1		G	GA	0.242	0.242	6.416	1.4e-10	??+?????+?????+++????+?-????????????????++++-????	ALHS ALSPAC ARIC_AA ARIC_EA B58C BHS CHSAA CHSEA CKB EPIC EXCEED FHS FinnTwin GS20K H2000 HCHS hunt KORA_F4 KORA_S3 Korcula LBC1936 MESA_AFA_new MESA_CAU_new MESA_HIS_new NEO NFBC66 NFBC86 orcades PIVUS Raine RS1 RS2 RS3 SAPALDIA_Edinburgh SAPALDIA_Gabriel SHIP-1 SHIP-TREND-0 SHIP-TREND-0_B2 Split Twins_UK UKB_AFR UKB_AMR UKB_EAS UKB_EUR UKB_SAS UKHLS VIKING Vis YFS	0.245398	0.173666	0.213002	0.169001	0.18204	464518	464518	464518	365467	0.2407	0.2405	0.2434	0.2445	0.0074	0.0076	0.0003	0.0193	0.0012	0.0014	0.0002	0.004	9.886e-10	5.721e-08	0.06499	1.636e-06	HLA-AS1(eQTL), HLX-AS1(nearest), MARK1(PoPs), RP11-295M18.2(eQTL), RP11-295M18.6(eQTL)
HLX	rs11118652	FALSE			1_221270457_C_T	1	221270457	FVC	FEV1,FVC	T	C	0.664	0.336	11.732	8.73e-32	+++++++-++?++++++--+++--+++-+++-+++++++++++++++-++	ALHS ALSPAC ARIC_AA ARIC_EA B58C BHS CHSAA CHSEA CKB EPIC EXCEED FHS FinnTwin GS20K H2000 HCHS hunt KORA_F4 KORA_S3 Korcula LBC1936 MESA_AFA_new MESA_CAU_new MESA_HIS_new NEO NFBC66 NFBC86 orcades PIVUS QBB Raine RS1 RS2 RS3 SAPALDIA_Edinburgh SAPALDIA_Gabriel SHIP-1 SHIP-TREND-0 SHIP-TREND-0_B2 Split Twins_UK UKB_AFR UKB_AMR UKB_EAS UKB_EUR UKB_SAS UKHLS VIKING Vis YFS	0.677538	0.6591	0.577007	0.637349	0.535959	581889	581887	577219	421045	0.66	0.658	0.6683	0.6769	0.0086	0.0126	-0.0004	0.0136	0.001	0.0011	0.0001	0.0033	3.982e-19	1.264e-29	0.002824	3.051e-05	HLX(PoPs,nearest), C1orf115(eQTL), HLA-AS1(eQTL), RP11-295M18.2(eQTL), RP11-295M18.6(eQTL)
C1orf140	rs11118683	TRUE	rs11118683	31911640	1_221473248_C_T	1	221473248	FVC	FEV1,FVC	T	C	0.419	0.419	6.149	7.81e-10	+++++++++-++++-+-++++++--+-+-+++-+-++++	ALHS ALSPAC ARIC_EA B58C BHS CHSEA EPIC FHS FinnTwin GS20K H2000 HCHS hunt KORA_F4 KORA_S3 Korcula LBC1936 MESA_CAU_new MESA_HIS_new NEO NFBC66 NFBC86 orcades PIVUS Raine RS1 RS2 RS3 SAPALDIA_Edinburgh SAPALDIA_Gabriel SHIP-1 SHIP-TREND-0 SHIP-TREND-0_B2 Split Twins_UK UKB_AMR UKB_EUR UKHLS VIKING	0.420823	0.503839	0.279355	0.406816	0.268021	581889	581887	577219	421045	0.3945	0.3911	0.4112	0.414	0.0063	0.0093	-0.0003	0.0093	0.0009	0.0011	0.0001	0.0031	2.032e-11	1.719e-17	0.02929	0.00289	C1orf115(eQTL), C1orf140(nearest), DUSP10(PoPs), HLX(eQTL), RP11-295M18.2(eQTL), RP11-295M18.6(eQTL)
C1orf140	rs12757436	TRUE	rs6657854	30061609	1_221631938_A_G	1	221631938	FVC		A	G	0.337	0.337	8.279	1.25e-16	++-+++-++++++++++-+++++++---+-++++-+-+++-++++++-	ALHS ALSPAC ARIC_AA ARIC_EA B58C BHS CHSAA CHSEA CKB EPIC FHS FinnTwin GS20K H2000 HCHS hunt KORA_F4 KORA_S3 Korcula LBC1936 MESA_AFA_new MESA_CAU_new MESA_HIS_new NEO NFBC66 NFBC86 orcades PIVUS Raine RS1 RS2 RS3 SAPALDIA_Edinburgh SAPALDIA_Gabriel SHIP-1 SHIP-TREND-0 SHIP-TREND-0_B2 Split Twins_UK UKB_AFR UKB_AMR UKB_EAS UKB_EUR UKB_SAS UKHLS VIKING Vis YFS	0.334948	0.0308252	0.386967	0.313599	0.333191	581889	581887	577219	421045	0.3418	0.3433	0.3371	0.3298	0.0058	0.0095	-0.0004	-0.0032	0.001	0.0011	0.0001	0.0032	1.891e-09	1.439e-17	0.00166	0.3204	C1orf115(eQTL), C1orf140(nearest), DUSP10(PoPs), HLX(eQTL), RP11-295M18.2(eQTL), RP11-295M18.6(eQTL)
WDR26	rs7527044	FALSE			1_224602243_G_T	1	224602243	FVC	FEV1,FVC	T	G	0.189	0.189	6.223	4.88e-10	++++-++-++?+++++++++++--+++-+?++++-++--++-+-++++--	ALHS ALSPAC ARIC_AA ARIC_EA B58C BHS CHSAA CHSEA CKB EPIC EXCEED FHS FinnTwin GS20K H2000 HCHS hunt KORA_F4 KORA_S3 Korcula LBC1936 MESA_AFA_new MESA_CAU_new MESA_HIS_new NEO NFBC66 NFBC86 orcades PIVUS QBB Raine RS1 RS2 RS3 SAPALDIA_Edinburgh SAPALDIA_Gabriel SHIP-1 SHIP-TREND-0 SHIP-TREND-0_B2 Split Twins_UK UKB_AFR UKB_AMR UKB_EAS UKB_EUR UKB_SAS UKHLS VIKING Vis YFS	0.214048	0.510632	0.00589865	0.255715	0.106852	570342	570340	565672	421045	0.2229	0.2233	0.2222	0.2179	0.0066	0.0082	0.0001	0.0189	0.0012	0.0014	0.0002	0.0037	5.887e-08	1.074e-08	0.4652	3.409e-07	NVL(PoPs), WDR26(nearest)
WNT9A	rs76109497	FALSE			1_228157363_A_G	1	228157363	FVC		A	G	0.168	0.168	6.289	3.2e-10	+--+++--++?+++++++++--+++++++?+---++-+-++++-+-++++	ALHS ALSPAC ARIC_AA ARIC_EA B58C BHS CHSAA CHSEA CKB EPIC EXCEED FHS FinnTwin GS20K H2000 HCHS hunt KORA_F4 KORA_S3 Korcula LBC1936 MESA_AFA_new MESA_CAU_new MESA_HIS_new NEO NFBC66 NFBC86 orcades PIVUS QBB Raine RS1 RS2 RS3 SAPALDIA_Edinburgh SAPALDIA_Gabriel SHIP-1 SHIP-TREND-0 SHIP-TREND-0_B2 Split Twins_UK UKB_AFR UKB_AMR UKB_EAS UKB_EUR UKB_SAS UKHLS VIKING Vis YFS	0.172923	0.0129708	0.179873	0.186368	0.133401	570333	570331	565663	421045	0.1696	0.1694	0.1722	0.1701	0.0066	0.0083	0	0.0135	0.0012	0.0014	0.0002	0.0041	8.827e-08	9.578e-09	0.8052	0.001013	WNT9A(PoPs,nearest), OBSCN(WES)
MIR4454	rs9660615	FALSE			1_229262606_C_T	1	229262606	PEF	PEF,FEV1	T	C	0.662	0.338	6.694	2.17e-11	+++++++++-+++-+---++-+	ALSPAC ARIC_AA B58C EPIC FinnTwin hunt LBC1936 orcades Raine RS1 RS2 RS3 SHIP-1 SHIP-TREND-0 SHIP-TREND-0_B2 Split UKB_AFR UKB_AMR UKB_EAS UKB_EUR UKB_SAS VIKING	0.660016	0.797896	0.594411	0.764588	0.612722	581884	581882	577214	421045	0.6508	0.6488	0.658	0.6556	0.0054	0.004	0.0008	0.0212	0.001	0.0011	0.0001	0.0032	2.061e-08	0.0002856	3.15e-08	7.066e-11	ACTA1(rare_disease), MIR4454(nearest), RHOU(eQTL), SPHAR(PoPs)
CHRM3	rs2355210	TRUE	rs6688537	28166213	1_239888757_C_T	1	239888757	FEV1/FVC	PEF,FEV1,FF	T	C	0.502	0.498	-13.819	1.95e-43	+-----------+----+++-+------+?--++-++--+-------++-	ALHS ALSPAC ARIC_AA ARIC_EA B58C BHS CHSAA CHSEA CKB EPIC EXCEED FHS FinnTwin GS20K H2000 HCHS hunt KORA_F4 KORA_S3 Korcula LBC1936 MESA_AFA_new MESA_CAU_new MESA_HIS_new NEO NFBC66 NFBC86 orcades PIVUS QBB Raine RS1 RS2 RS3 SAPALDIA_Edinburgh SAPALDIA_Gabriel SHIP-1 SHIP-TREND-0 SHIP-TREND-0_B2 Split Twins_UK UKB_AFR UKB_AMR UKB_EAS UKB_EUR UKB_SAS UKHLS VIKING Vis YFS	0.505637	0.501343	0.493536	0.530596	0.521636	570339	570337	565669	421045	0.502	0.5014	0.5038	0.5018	-0.0086	-0.0038	-0.0017	-0.0348	0.0009	0.0011	0.0001	0.0031	2.226e-21	0.0003556	6.905e-40	4.614e-30	CHRM3(rare_disease,PoPs,nearest), CHRM3-AS2(eQTL)
MIR1273E	rs12404859	FALSE			1_240778403_G_T	1	240778403	FEV1/FVC		T	G	0.778	0.222	6.168	6.93e-10	-++++-+++++-++-+-----+-+--+-------++++++---+++---	ALHS ALSPAC ARIC_AA ARIC_EA B58C BHS CHSAA CHSEA CKB EPIC EXCEED FHS FinnTwin GS20K H2000 HCHS hunt KORA_F4 KORA_S3 Korcula LBC1936 MESA_AFA_new MESA_CAU_new MESA_HIS_new NEO NFBC66 NFBC86 orcades PIVUS Raine RS1 RS2 RS3 SAPALDIA_Edinburgh SAPALDIA_Gabriel SHIP-1 SHIP-TREND-0 SHIP-TREND-0_B2 Split Twins_UK UKB_AFR UKB_AMR UKB_EAS UKB_EUR UKB_SAS UKHLS VIKING Vis YFS	0.797503	0.934382	0.622871	0.77749	0.655511	581850	581848	577180	421045	0.7541	0.7493	0.7771	0.795	0.0048	0.0028	0.0009	0.0114	0.0011	0.0013	0.0002	0.0038	1.31e-05	0.02902	5.671e-08	0.002765	GREM2(PoPs), MIR1273E(nearest)
TMEM18	rs6752706	FALSE			2_629831_C_T	2	629831	FEV1/FVC		T	C	0.163	0.163	-5.886	3.96e-09	-+--+---+--+--+--+++--+-----+-+-++--+---+--+----++	ALHS ALSPAC ARIC_AA ARIC_EA B58C BHS CHSAA CHSEA CKB EPIC EXCEED FHS FinnTwin GS20K H2000 HCHS hunt KORA_F4 KORA_S3 Korcula LBC1936 MESA_AFA_new MESA_CAU_new MESA_HIS_new NEO NFBC66 NFBC86 orcades PIVUS QBB Raine RS1 RS2 RS3 SAPALDIA_Edinburgh SAPALDIA_Gabriel SHIP-1 SHIP-TREND-0 SHIP-TREND-0_B2 Split Twins_UK UKB_AFR UKB_AMR UKB_EAS UKB_EUR UKB_SAS UKHLS VIKING Vis YFS	0.17798	0.104341	0.08672	0.239861	0.140305	581888	581886	577218	421045	0.1655	0.1642	0.1728	0.1842	-0.0017	0.0023	-0.001	-0.0177	0.0013	0.0015	0.0002	0.0041	0.1834	0.1146	1.796e-08	1.417e-05	TMEM18(PoPs,nearest)
LINC00299	rs2630744	FALSE			2_8464827_A_T	2	8464827	FEV1/FVC	FEV1,FF	A	T	0.315	0.315	-6.72	1.82e-11	---+---+--------------+----+-----------+--+--+-+-	ALHS ALSPAC ARIC_AA ARIC_EA B58C BHS CHSAA CHSEA CKB EPIC EXCEED FHS FinnTwin GS20K H2000 HCHS hunt KORA_F4 KORA_S3 Korcula LBC1936 MESA_AFA_new MESA_CAU_new MESA_HIS_new NEO NFBC66 NFBC86 orcades PIVUS Raine RS1 RS2 RS3 SAPALDIA_Edinburgh SAPALDIA_Gabriel SHIP-1 SHIP-TREND-0 SHIP-TREND-0_B2 Split Twins_UK UKB_AFR UKB_AMR UKB_EAS UKB_EUR UKB_SAS UKHLS VIKING Vis YFS	0.338424	0.125448	0.237136	0.357247	0.311162	581885	581883	577215	421045	0.3114	0.3093	0.323	0.3288	-0.0054	-0.0028	-0.0009	-0.0191	0.001	0.0012	0.0001	0.0033	4.994e-08	0.01756	4.995e-11	5.091e-09	ID2(PoPs), LINC00299(nearest)
ASAP2	rs4668610	TRUE	rs955277	30804561	2_9299699_A_T	2	9299699	FEV1/FVC	PEF,FF	A	T	0.642	0.358	-9.64	5.41e-22	+--------++-+----+--+-----+----+-------+---+-+-+--	ALHS ALSPAC ARIC_AA ARIC_EA B58C BHS CHSAA CHSEA CKB EPIC EXCEED FHS FinnTwin GS20K H2000 HCHS hunt KORA_F4 KORA_S3 Korcula LBC1936 MESA_AFA_new MESA_CAU_new MESA_HIS_new NEO NFBC66 NFBC86 orcades PIVUS QBB Raine RS1 RS2 RS3 SAPALDIA_Edinburgh SAPALDIA_Gabriel SHIP-1 SHIP-TREND-0 SHIP-TREND-0_B2 Split Twins_UK UKB_AFR UKB_AMR UKB_EAS UKB_EUR UKB_SAS UKHLS VIKING Vis YFS	0.617341	0.140447	0.78852	0.548659	0.639564	581889	581887	577219	421045	0.6341	0.6374	0.6199	0.6072	-0.0037	0.0012	-0.0013	-0.0247	0.001	0.0011	0.0001	0.0032	0.0001321	0.3035	5.056e-22	5.103e-15	ASAP2(eQTL,PoPs,nearest)
LOC101926966	rs10929387	TRUE	rs2544536	30804560	2_15912926_A_G	2	15912926	FEV1/FVC	PEF,FEV1,FF	A	G	0.467	0.467	-11.389	4.72e-30	+---------+---------+-+-----+----------+-------++	ALHS ALSPAC ARIC_AA ARIC_EA B58C BHS CHSAA CHSEA CKB EPIC EXCEED FHS FinnTwin GS20K H2000 HCHS hunt KORA_F4 KORA_S3 Korcula LBC1936 MESA_AFA_new MESA_CAU_new MESA_HIS_new NEO NFBC66 NFBC86 orcades PIVUS Raine RS1 RS2 RS3 SAPALDIA_Edinburgh SAPALDIA_Gabriel SHIP-1 SHIP-TREND-0 SHIP-TREND-0_B2 Split Twins_UK UKB_AFR UKB_AMR UKB_EAS UKB_EUR UKB_SAS UKHLS VIKING Vis YFS	0.48664	0.421812	0.417839	0.455504	0.538876	581886	581884	577216	421045	0.4581	0.4554	0.4713	0.4863	-0.0081	-0.0045	-0.0014	-0.0261	0.0009	0.0011	0.0001	0.0031	7.685e-19	2.604e-05	6.641e-27	1.083e-17	LOC101926966(nearest), MYCN(PoPs)
KCNS3	rs55884799	TRUE	rs62126408	26635082	2_18287623_C_T	2	18287623	FEV1/FVC	PEF,FEV1,FF	T	C	0.839	0.161	-13.864	1.05e-43	------+------------+---+----+-++++---+-----+---+--	ALHS ALSPAC ARIC_AA ARIC_EA B58C BHS CHSAA CHSEA CKB EPIC EXCEED FHS FinnTwin GS20K H2000 HCHS hunt KORA_F4 KORA_S3 Korcula LBC1936 MESA_AFA_new MESA_CAU_new MESA_HIS_new NEO NFBC66 NFBC86 orcades PIVUS QBB Raine RS1 RS2 RS3 SAPALDIA_Edinburgh SAPALDIA_Gabriel SHIP-1 SHIP-TREND-0 SHIP-TREND-0_B2 Split Twins_UK UKB_AFR UKB_AMR UKB_EAS UKB_EUR UKB_SAS UKHLS VIKING Vis YFS	0.825676	0.61815	0.92504	0.778422	0.869539	581879	581877	577209	421045	0.83	0.8308	0.8244	0.8228	-0.015	-0.0094	-0.0024	-0.0313	0.0013	0.0015	0.0002	0.004	5.571e-33	2.092e-10	4.805e-42	6.823e-15	KCNS3(PoPs,nearest)
RDH14	rs58421832	TRUE	rs6751968	30804560	2_18604387_C_T	2	18604387	FEV1	PEF,FEV1,FVC	T	C	0.797	0.203	-9.389	6.08e-21	-----++------++-++-----+-----+-+-------+-------+	ALHS ALSPAC ARIC_AA ARIC_EA B58C BHS CHSAA CHSEA CKB EPIC EXCEED FHS FinnTwin GS20K H2000 HCHS hunt KORA_F4 KORA_S3 Korcula LBC1936 MESA_AFA_new MESA_CAU_new MESA_HIS_new NEO NFBC66 NFBC86 orcades PIVUS Raine RS1 RS2 RS3 SAPALDIA_Edinburgh SAPALDIA_Gabriel SHIP-1 SHIP-TREND-0 SHIP-TREND-0_B2 Split Twins_UK UKB_AFR UKB_EAS UKB_EUR UKB_SAS UKHLS VIKING Vis YFS	0.816546	0.624161	0.699994	0.704158	0.629201	581889	581887	577219	421045	0.778	0.7744	0.7967	0.8091	-0.0096	-0.0099	-0.0006	-0.0256	0.0011	0.0013	0.0002	0.0039	4.388e-18	1.663e-14	0.0002775	4.465e-11	KCNS3(PoPs), RDH14(nearest)
RDH14	rs13008882	FALSE			2_18699506_A_G	2	18699506	PEF		A	G	0.183	0.183	-6.394	1.62e-10	------	ARIC_AA UKB_AFR UKB_AMR UKB_EAS UKB_EUR UKB_SAS	0.185228	0.0318193	0.111573	0.180665	0.1637	581889	581887	577219	421045	0.1747	0.1738	0.1825	0.1806	-0.0086	-0.0085	-0.0006	-0.0277	0.0012	0.0014	0.0002	0.004	2.168e-12	2.641e-09	0.0005835	3.024e-12	KCNS3(PoPs), RDH14(nearest)
RDH14	rs13430465	TRUE	rs13430465	30804560	2_18702313_C_T	2	18702313	FVC	FEV1,FVC	T	C	0.167	0.167	10.386	2.86e-25	+-++++++++++++++++++-+-+++++++-++++-+++-+-+++++---	ALHS ALSPAC ARIC_AA ARIC_EA B58C BHS CHSAA CHSEA CKB EPIC EXCEED FHS FinnTwin GS20K H2000 HCHS hunt KORA_F4 KORA_S3 Korcula LBC1936 MESA_AFA_new MESA_CAU_new MESA_HIS_new NEO NFBC66 NFBC86 orcades PIVUS QBB Raine RS1 RS2 RS3 SAPALDIA_Edinburgh SAPALDIA_Gabriel SHIP-1 SHIP-TREND-0 SHIP-TREND-0_B2 Split Twins_UK UKB_AFR UKB_AMR UKB_EAS UKB_EUR UKB_SAS UKHLS VIKING Vis YFS	0.0797305	0.0940522	0.666593	0.0533196	0.073562	581877	581875	577207	421045	0.3122	0.3234	0.1749	0.0918	0.0127	0.0154	0.0004	0.0305	0.0014	0.0017	0.0002	0.0056	6.48e-19	2.376e-20	0.08792	5.552e-08	KCNS3(PoPs), RDH14(nearest)
NT5C1B-RDH14	rs7558736	FALSE			2_18925494_A_G	2	18925494	PEF		A	G	0.449	0.449	6.526	6.76e-11	--+-++	ARIC_AA UKB_AFR UKB_AMR UKB_EAS UKB_EUR UKB_SAS	0.445009	0.563463	0.643565	0.455546	0.556267	581888	581886	577218	421045	0.4812	0.4854	0.4605	0.4526	0.003	0.0018	0.0004	0.0151	0.0009	0.0011	0.0001	0.0031	0.001036	0.09909	0.0008004	8.971e-07	NT5C1B-RDH14(nearest), RDH14(PoPs)
MIR4757	rs7602668	FALSE			2_19439119_C_G	2	19439119	PEF		C	G	0.226	0.226	7.476	7.68e-14	+++-+++-+-+-+--+++-++-	ALSPAC ARIC_AA B58C EPIC FinnTwin hunt LBC1936 orcades Raine RS1 RS2 RS3 SHIP-1 SHIP-TREND-0 SHIP-TREND-0_B2 Split UKB_AFR UKB_AMR UKB_EAS UKB_EUR UKB_SAS VIKING	0.228197	0.220133	0.187433	0.209011	0.115424	581889	581887	577219	421045	0.2228	0.2221	0.226	0.2276	0.0009	-0.0013	0.0005	0.0246	0.0011	0.0013	0.0002	0.0036	0.4187	0.3242	0.0009526	1.26e-11	MATN3(eQTL), MIR4757(nearest), OSR1(PoPs), SDC1(eQTL), WDR35(eQTL)
KLHL29	rs3795938	TRUE	rs13009582	30804560	2_23912712_C_T	2	23912712	FEV1	FEV1,FVC	T	C	0.583	0.417	7.249	4.19e-13	++++++-+++++-++++-+---+--+++--++-++++--+++++++-++-	ALHS ALSPAC ARIC_AA ARIC_EA B58C BHS CHSAA CHSEA CKB EPIC EXCEED FHS FinnTwin GS20K H2000 HCHS hunt KORA_F4 KORA_S3 Korcula LBC1936 MESA_AFA_new MESA_CAU_new MESA_HIS_new NEO NFBC66 NFBC86 orcades PIVUS QBB Raine RS1 RS2 RS3 SAPALDIA_Edinburgh SAPALDIA_Gabriel SHIP-1 SHIP-TREND-0 SHIP-TREND-0_B2 Split Twins_UK UKB_AFR UKB_AMR UKB_EAS UKB_EUR UKB_SAS UKHLS VIKING Vis YFS	0.548092	0.2945	0.778327	0.568912	0.589659	581888	581886	577218	421045	0.5798	0.5833	0.5575	0.5431	0.0065	0.0072	0.0003	0.01	0.0009	0.0011	0.0001	0.0031	5.274e-12	7.587e-11	0.0157	0.001196	KLHL29(PoPs,nearest), AC008073.9(eQTL), AC009228.1(eQTL), ENSG00000283031(eQTL), FAM228A(eQTL), FAM228B(eQTL), FKBP1B(eQTL), PFN4(mouse_KO), UBXN2A(eQTL)
CIB4	rs1662984	TRUE	rs732990	30804560	2_26844044_A_G	2	26844044	FVC	FVC,FF	A	G	0.522	0.478	-6.907	4.96e-12	-++++------+------------------+-+--+-+-+-------+++	ALHS ALSPAC ARIC_AA ARIC_EA B58C BHS CHSAA CHSEA CKB EPIC EXCEED FHS FinnTwin GS20K H2000 HCHS hunt KORA_F4 KORA_S3 Korcula LBC1936 MESA_AFA_new MESA_CAU_new MESA_HIS_new NEO NFBC66 NFBC86 orcades PIVUS QBB Raine RS1 RS2 RS3 SAPALDIA_Edinburgh SAPALDIA_Gabriel SHIP-1 SHIP-TREND-0 SHIP-TREND-0_B2 Split Twins_UK UKB_AFR UKB_AMR UKB_EAS UKB_EUR UKB_SAS UKHLS VIKING Vis YFS	0.449525	0.767344	0.883244	0.470289	0.598034	581887	581885	577217	421045	0.4951	0.4986	0.4706	0.4637	-0.0028	-0.0074	0.0008	-0.0021	0.001	0.0011	0.0001	0.0031	0.003858	6.992e-11	4.119e-09	0.5039	C2orf16(eQTL), CENPA(PoPs), CIB4(nearest), DRC1(rare_disease)
LTBP1	rs219155	FALSE			2_33216941_C_G	2	33216941	FEV1/FVC		C	G	0.379	0.379	-6.702	2.06e-11	+-++-----+----------------+-++--+--+--+---++----+-	ALHS ALSPAC ARIC_AA ARIC_EA B58C BHS CHSAA CHSEA CKB EPIC EXCEED FHS FinnTwin GS20K H2000 HCHS hunt KORA_F4 KORA_S3 Korcula LBC1936 MESA_AFA_new MESA_CAU_new MESA_HIS_new NEO NFBC66 NFBC86 orcades PIVUS QBB Raine RS1 RS2 RS3 SAPALDIA_Edinburgh SAPALDIA_Gabriel SHIP-1 SHIP-TREND-0 SHIP-TREND-0_B2 Split Twins_UK UKB_AFR UKB_AMR UKB_EAS UKB_EUR UKB_SAS UKHLS VIKING Vis YFS	0.404782	0.0957403	0.267184	0.268761	0.29177	581885	581883	577215	421045	0.3784	0.3774	0.3925	0.3951	-0.0014	0.0021	-0.0009	-0.0045	0.0009	0.0011	0.0001	0.0031	0.1326	0.05175	3.945e-10	0.1509	LTBP1(PoPs,nearest)
LTBP1	rs62133340	FALSE			2_33372505_A_G	2	33372505	FVC		A	G	0.726	0.274	6.066	1.31e-09	+++++-++++++-++++++-+--++++--++++++++---++-++-+++-	ALHS ALSPAC ARIC_AA ARIC_EA B58C BHS CHSAA CHSEA CKB EPIC EXCEED FHS FinnTwin GS20K H2000 HCHS hunt KORA_F4 KORA_S3 Korcula LBC1936 MESA_AFA_new MESA_CAU_new MESA_HIS_new NEO NFBC66 NFBC86 orcades PIVUS QBB Raine RS1 RS2 RS3 SAPALDIA_Edinburgh SAPALDIA_Gabriel SHIP-1 SHIP-TREND-0 SHIP-TREND-0_B2 Split Twins_UK UKB_AFR UKB_AMR UKB_EAS UKB_EUR UKB_SAS UKHLS VIKING Vis YFS	0.677948	0.922277	0.938752	0.748025	0.833832	581876	581874	577206	421045	0.7034	0.7049	0.6912	0.6868	0.005	0.0073	-0.0002	0.0014	0.0011	0.0012	0.0001	0.0033	2.373e-06	4.698e-09	0.1989	0.6732	LTBP1(eQTL,PoPs,nearest)
CRIM1	rs1477048	FALSE			2_36660476_C_G	2	36660476	FEV1		C	G	0.209	0.209	-6.622	3.55e-11	--+-------+----+-+-++-++---+-+-++-+-+--++--+--+---	ALHS ALSPAC ARIC_AA ARIC_EA B58C BHS CHSAA CHSEA CKB EPIC EXCEED FHS FinnTwin GS20K H2000 HCHS hunt KORA_F4 KORA_S3 Korcula LBC1936 MESA_AFA_new MESA_CAU_new MESA_HIS_new NEO NFBC66 NFBC86 orcades PIVUS QBB Raine RS1 RS2 RS3 SAPALDIA_Edinburgh SAPALDIA_Gabriel SHIP-1 SHIP-TREND-0 SHIP-TREND-0_B2 Split Twins_UK UKB_AFR UKB_AMR UKB_EAS UKB_EUR UKB_SAS UKHLS VIKING Vis YFS	0.141741	0.400197	0.551007	0.143235	0.233088	581887	581885	577217	421045	0.2818	0.2949	0.2071	0.1537	-0.0074	-0.0069	-0.0007	-0.0141	0.0012	0.0013	0.0002	0.0043	1.763e-10	3.197e-07	0.0001764	0.001069	CRIM1(PoPs,nearest), HEATR5B(eQTL)
CRIM1	rs888078	FALSE			2_36681193_A_G	2	36681193	FVC		A	G	0.436	0.436	-7.142	9.17e-13	-++-------+---+---+++------++--+-+----------------	ALHS ALSPAC ARIC_AA ARIC_EA B58C BHS CHSAA CHSEA CKB EPIC EXCEED FHS FinnTwin GS20K H2000 HCHS hunt KORA_F4 KORA_S3 Korcula LBC1936 MESA_AFA_new MESA_CAU_new MESA_HIS_new NEO NFBC66 NFBC86 orcades PIVUS QBB Raine RS1 RS2 RS3 SAPALDIA_Edinburgh SAPALDIA_Gabriel SHIP-1 SHIP-TREND-0 SHIP-TREND-0_B2 Split Twins_UK UKB_AFR UKB_AMR UKB_EAS UKB_EUR UKB_SAS UKHLS VIKING Vis YFS	0.397688	0.704013	0.62399	0.384217	0.594192	581888	581886	577218	421045	0.4431	0.4478	0.4207	0.4013	-0.0037	-0.0072	0.0005	-0.0075	0.0009	0.0011	0.0001	0.0031	5.416e-05	3.153e-11	0.0003138	0.01633	CRIM1(PoPs,nearest), HEATR5B(eQTL)
CRIM1	rs1179500	TRUE	rs1179500	31911640	2_36724282_A_C	2	36724282	FEV1/FVC		A	C	0.696	0.304	-10.975	5.02e-28	----------++-+------+-----+---+--+--++-+++++-+-++-	ALHS ALSPAC ARIC_AA ARIC_EA B58C BHS CHSAA CHSEA CKB EPIC EXCEED FHS FinnTwin GS20K H2000 HCHS hunt KORA_F4 KORA_S3 Korcula LBC1936 MESA_AFA_new MESA_CAU_new MESA_HIS_new NEO NFBC66 NFBC86 orcades PIVUS QBB Raine RS1 RS2 RS3 SAPALDIA_Edinburgh SAPALDIA_Gabriel SHIP-1 SHIP-TREND-0 SHIP-TREND-0_B2 Split Twins_UK UKB_AFR UKB_AMR UKB_EAS UKB_EUR UKB_SAS UKHLS VIKING Vis YFS	0.721255	0.421279	0.62072	0.741799	0.462746	581885	581883	577215	421045	0.6869	0.6843	0.6991	0.7111	-0.004	0.0012	-0.0015	-0.0009	0.001	0.0012	0.0001	0.0034	5.344e-05	0.2948	1.042e-24	0.7801	CRIM1(PoPs,nearest), AC007401.2(eQTL), FEZ2(eQTL)
CYP1B1	rs1800440	FALSE			2_38298139_C_T	2	38298139	PEF		T	C	0.818	0.182	5.964	2.46e-09	++-++++--+-+++++---+++	ALSPAC ARIC_AA B58C EPIC FinnTwin hunt LBC1936 orcades Raine RS1 RS2 RS3 SHIP-1 SHIP-TREND-0 SHIP-TREND-0_B2 Split UKB_AFR UKB_AMR UKB_EAS UKB_EUR UKB_SAS VIKING	0.813359	0.986988	0.993926	0.836848	0.785363	581889	581887	577219	421045	0.8182	0.8185	0.8165	0.8169	0.0039	0.0013	0.0009	0.0235	0.0013	0.0015	0.0002	0.004	0.002397	0.3887	8.077e-07	2.687e-09	ATL2(PoPs), CYP1B1(nearest)
PKDCC	rs1440099	TRUE	rs4952564	30804560	2_42291037_C_T	2	42291037	FEV1	FEV1,FVC	T	C	0.611	0.389	-6.354	2.1e-10	---++--+--+------++---+---+-+++-+-+--+-++------+-	ALHS ALSPAC ARIC_AA ARIC_EA B58C BHS CHSAA CHSEA CKB EPIC EXCEED FHS FinnTwin GS20K H2000 HCHS hunt KORA_F4 KORA_S3 Korcula LBC1936 MESA_AFA_new MESA_CAU_new MESA_HIS_new NEO NFBC66 NFBC86 orcades PIVUS Raine RS1 RS2 RS3 SAPALDIA_Edinburgh SAPALDIA_Gabriel SHIP-1 SHIP-TREND-0 SHIP-TREND-0_B2 Split Twins_UK UKB_AFR UKB_AMR UKB_EAS UKB_EUR UKB_SAS UKHLS VIKING Vis YFS	0.640755	0.419708	0.518548	0.575614	0.554255	581889	581887	577219	421045	0.5917	0.5873	0.6153	0.6344	-0.0053	-0.0056	-0.0003	-0.0039	0.0009	0.0011	0.0001	0.0032	1.315e-08	2.198e-07	0.01863	0.2277	PKDCC(PoPs,nearest)
EML4	rs10490551	TRUE	rs12466981	31911640	2_42560388_A_T	2	42560388	FEV1	PEF,FEV1,FF	A	T	0.308	0.308	8.82	1.15e-18	++-++-++++++--+++++-+++-+-+--++++--++++++++-+++--+	ALHS ALSPAC ARIC_AA ARIC_EA B58C BHS CHSAA CHSEA CKB EPIC EXCEED FHS FinnTwin GS20K H2000 HCHS hunt KORA_F4 KORA_S3 Korcula LBC1936 MESA_AFA_new MESA_CAU_new MESA_HIS_new NEO NFBC66 NFBC86 orcades PIVUS QBB Raine RS1 RS2 RS3 SAPALDIA_Edinburgh SAPALDIA_Gabriel SHIP-1 SHIP-TREND-0 SHIP-TREND-0_B2 Split Twins_UK UKB_AFR UKB_AMR UKB_EAS UKB_EUR UKB_SAS UKHLS VIKING Vis YFS	0.277361	0.215549	0.547046	0.210215	0.131941	581882	581880	577212	421045	0.3283	0.3309	0.2952	0.2725	0.008	0.0057	0.0012	0.0231	0.001	0.0012	0.0001	0.0034	5.835e-16	9.943e-07	1.197e-15	1.586e-11	EML4(PoPs,nearest), AC016735.2(eQTL)
THADA	rs77972916	FALSE			2_43762112_A_G	2	43762112	PEF	PEF,FF	A	G	0.0736	0.0736	10.893	1.24e-27	+-++++++---+++++++++-+	ALSPAC ARIC_AA B58C EPIC FinnTwin hunt LBC1936 orcades Raine RS1 RS2 RS3 SHIP-1 SHIP-TREND-0 SHIP-TREND-0_B2 Split UKB_AFR UKB_AMR UKB_EAS UKB_EUR UKB_SAS VIKING	0.0763456	0.00338348	0.00176019	0.0837104	0.0238802	496600	496598	491930	419481	0.0739	0.0737	0.0745	0.0747	0.0042	-0.0028	0.0018	0.0624	0.002	0.0023	0.0003	0.0059	0.03455	0.2233	1.096e-11	2.109e-26	PLEKHH2(PoPs), THADA(nearest)
PPM1B	rs11124981	FALSE			2_44462133_A_T	2	44462133	FEV1/FVC		A	T	0.805	0.195	6.299	3e-10	++++++--+++-++--+-+++++++-+----++++-++++-++	ALHS ALSPAC ARIC_EA B58C BHS CHSEA EPIC EXCEED FHS FinnTwin GS20K H2000 HCHS hunt KORA_F4 KORA_S3 Korcula LBC1936 MESA_CAU_new MESA_HIS_new NEO NFBC66 NFBC86 orcades PIVUS Raine RS1 RS2 RS3 SAPALDIA_Edinburgh SAPALDIA_Gabriel SHIP-1 SHIP-TREND-0 SHIP-TREND-0_B2 Split Twins_UK UKB_AMR UKB_EUR UKB_SAS UKHLS VIKING Vis YFS	0.806502	0.807081	0.715476	0.849198	0.889499	581889	581887	577219	421045	0.7859	0.7832	0.7977	0.7969	0.0034	0.0009	0.0009	0.0028	0.0011	0.0013	0.0002	0.0039	0.002442	0.4869	8.169e-08	0.4683	PPM1B(PoPs,nearest)
PPP1R21	rs4293602	FALSE			2_48732944_A_G	2	48732944	FVC	FEV1,FVC	A	G	0.351	0.351	8.326	8.35e-17	+++++++++--+-++++--+-+-++-+-++-++-+-++-+++-+++++--	ALHS ALSPAC ARIC_AA ARIC_EA B58C BHS CHSAA CHSEA CKB EPIC EXCEED FHS FinnTwin GS20K H2000 HCHS hunt KORA_F4 KORA_S3 Korcula LBC1936 MESA_AFA_new MESA_CAU_new MESA_HIS_new NEO NFBC66 NFBC86 orcades PIVUS QBB Raine RS1 RS2 RS3 SAPALDIA_Edinburgh SAPALDIA_Gabriel SHIP-1 SHIP-TREND-0 SHIP-TREND-0_B2 Split Twins_UK UKB_AFR UKB_AMR UKB_EAS UKB_EUR UKB_SAS UKHLS VIKING Vis YFS	0.297325	0.121767	0.704464	0.150692	0.196555	581889	581887	577219	421045	0.3657	0.3769	0.3185	0.301	0.007	0.0092	0.0001	0.0133	0.001	0.0012	0.0001	0.0034	3.621e-12	4.38e-15	0.6975	7.87e-05	LHCGR(mouse_KO,PoPs), PPP1R21(eQTL,nearest)
EFEMP1	rs7426380	FALSE			2_56095010_A_G	2	56095010	FEV1/FVC		A	G	0.475	0.475	-10.214	1.71e-24	------+---+-+--------+------+++-------------------	ALHS ALSPAC ARIC_AA ARIC_EA B58C BHS CHSAA CHSEA CKB EPIC EXCEED FHS FinnTwin GS20K H2000 HCHS hunt KORA_F4 KORA_S3 Korcula LBC1936 MESA_AFA_new MESA_CAU_new MESA_HIS_new NEO NFBC66 NFBC86 orcades PIVUS QBB Raine RS1 RS2 RS3 SAPALDIA_Edinburgh SAPALDIA_Gabriel SHIP-1 SHIP-TREND-0 SHIP-TREND-0_B2 Split Twins_UK UKB_AFR UKB_AMR UKB_EAS UKB_EUR UKB_SAS UKHLS VIKING Vis YFS	0.551634	0.268383	0.108654	0.439527	0.347518	581889	581887	577219	421045	0.5124	0.5089	0.5332	0.5491	0.0048	0.0126	-0.0013	-0.0044	0.001	0.0011	0.0001	0.0031	9.384e-07	3.697e-28	3.616e-23	0.1515	EFEMP1(PoPs,nearest), PNPT1(rare_disease)
EFEMP1	rs59985551	TRUE	rs1430193	24929828	2_56106928_C_T	2	56106928	FVC	FEV1,FVC	T	C	0.309	0.309	-13.647	2.09e-42	------+----------+---+--------++-----+-----+------	ALHS ALSPAC ARIC_AA ARIC_EA B58C BHS CHSAA CHSEA CKB EPIC EXCEED FHS FinnTwin GS20K H2000 HCHS hunt KORA_F4 KORA_S3 Korcula LBC1936 MESA_AFA_new MESA_CAU_new MESA_HIS_new NEO NFBC66 NFBC86 orcades PIVUS QBB Raine RS1 RS2 RS3 SAPALDIA_Edinburgh SAPALDIA_Gabriel SHIP-1 SHIP-TREND-0 SHIP-TREND-0_B2 Split Twins_UK UKB_AFR UKB_AMR UKB_EAS UKB_EUR UKB_SAS UKHLS VIKING Vis YFS	0.225642	0.0789463	0.755556	0.270203	0.27346	581888	581886	577218	421045	0.3249	0.3401	0.267	0.2273	-0.008	-0.016	0.0013	0.0074	0.0011	0.0013	0.0002	0.0036	1.261e-13	6.795e-37	9.946e-18	0.04341	EFEMP1(PoPs,nearest), PNPT1(rare_disease)
MIR217HG	rs62164518	FALSE			2_56237577_A_G	2	56237577	FEV1/FVC		A	G	0.907	0.093	-6.904	5.06e-12	--?--+?-?--++----+-+-?----+-+-++--+++---???---++-	ALHS ALSPAC ARIC_AA ARIC_EA B58C BHS CHSAA CHSEA CKB EPIC EXCEED FHS FinnTwin GS20K H2000 HCHS hunt KORA_F4 KORA_S3 Korcula LBC1936 MESA_AFA_new MESA_CAU_new MESA_HIS_new NEO NFBC66 NFBC86 orcades PIVUS Raine RS1 RS2 RS3 SAPALDIA_Edinburgh SAPALDIA_Gabriel SHIP-1 SHIP-TREND-0 SHIP-TREND-0_B2 Split Twins_UK UKB_AFR UKB_AMR UKB_EAS UKB_EUR UKB_SAS UKHLS VIKING Vis YFS	0.906651	0.995021	0.998566	0.952504	0.946224	496601	496599	491931	419481	0.903	0.903	0.9031	0.9035	-0.0077	-0.0027	-0.0015	-0.0234	0.0018	0.0021	0.0002	0.0053	1.193e-05	0.1897	1.564e-10	9.139e-06	EFEMP1(PoPs), MIR217HG(nearest), PNPT1(rare_disease)
VRK2	rs1851140	FALSE			2_58070482_C_T	2	58070482	FVC		T	C	0.545	0.455	-6.495	8.32e-11	--------------------+---++----+-+-+---------+-+--	ALHS ALSPAC ARIC_AA ARIC_EA B58C BHS CHSAA CHSEA CKB EPIC EXCEED FHS FinnTwin GS20K H2000 HCHS hunt KORA_F4 KORA_S3 Korcula LBC1936 MESA_AFA_new MESA_CAU_new MESA_HIS_new NEO NFBC66 NFBC86 orcades PIVUS Raine RS1 RS2 RS3 SAPALDIA_Edinburgh SAPALDIA_Gabriel SHIP-1 SHIP-TREND-0 SHIP-TREND-0_B2 Split Twins_UK UKB_AFR UKB_AMR UKB_EAS UKB_EUR UKB_SAS UKHLS VIKING Vis YFS	0.530702	0.94221	0.62117	0.516594	0.583634	581889	581887	577219	421045	0.5462	0.5475	0.5406	0.5408	-0.0049	-0.0064	0	-0.0091	0.0009	0.0011	0.0001	0.0031	1.019e-07	2.762e-09	0.9269	0.003101	VRK2(PoPs,nearest)
USP34	rs1186710	FALSE			2_61688727_A_T	2	61688727	FEV1/FVC		A	T	0.612	0.388	7.612	2.69e-14	+++++-+++++++++++++++--+++++++++---+++-+++-+++-+-+	ALHS ALSPAC ARIC_AA ARIC_EA B58C BHS CHSAA CHSEA CKB EPIC EXCEED FHS FinnTwin GS20K H2000 HCHS hunt KORA_F4 KORA_S3 Korcula LBC1936 MESA_AFA_new MESA_CAU_new MESA_HIS_new NEO NFBC66 NFBC86 orcades PIVUS QBB Raine RS1 RS2 RS3 SAPALDIA_Edinburgh SAPALDIA_Gabriel SHIP-1 SHIP-TREND-0 SHIP-TREND-0_B2 Split Twins_UK UKB_AFR UKB_AMR UKB_EAS UKB_EUR UKB_SAS UKHLS VIKING Vis YFS	0.609893	0.551031	0.666171	0.689645	0.618913	581887	581885	577217	421045	0.6109	0.6109	0.6119	0.605	0	-0.004	0.0009	0.0067	0.0009	0.0011	0.0001	0.0031	0.9779	0.0002173	8.167e-12	0.03167	USP34(PoPs,nearest), PEX13(rare_disease)
OTX1	rs58235267	FALSE			2_63277843_C_G	2	63277843	FEV1		C	G	0.484	0.484	6.807	9.98e-12	??-?????+?????-++????+?+?????+???????????+++++????	ALHS ALSPAC ARIC_AA ARIC_EA B58C BHS CHSAA CHSEA CKB EPIC EXCEED FHS FinnTwin GS20K H2000 HCHS hunt KORA_F4 KORA_S3 Korcula LBC1936 MESA_AFA_new MESA_CAU_new MESA_HIS_new NEO NFBC66 NFBC86 orcades PIVUS QBB Raine RS1 RS2 RS3 SAPALDIA_Edinburgh SAPALDIA_Gabriel SHIP-1 SHIP-TREND-0 SHIP-TREND-0_B2 Split Twins_UK UKB_AFR UKB_AMR UKB_EAS UKB_EUR UKB_SAS UKHLS VIKING Vis YFS	0.512134	0.542686	0.322442	0.634198	0.387251	464518	464518	464518	365467	0.478	0.4757	0.4996	0.5101	0.0068	0.0057	0.0007	0.0111	0.001	0.0012	0.0001	0.0035	5.475e-11	2.636e-06	2.396e-06	0.001367	OTX1(eQTL,credible,nearest), EHBP1(PoPs), MDH1(eQTL), TMEM17(eQTL), UGP2(eQTL), WDPCP(eQTL)
SERTAD2	rs2302643	FALSE			2_64881229_A_G	2	64881229	FEV1/FVC		A	G	0.442	0.442	-8.222	2e-16	+-+-------+-++?--+-+-+-+---+++-+----+---+-+-++++-	ALHS ALSPAC ARIC_AA ARIC_EA B58C BHS CHSAA CHSEA CKB EPIC EXCEED FHS FinnTwin GS20K H2000 HCHS hunt KORA_F4 KORA_S3 Korcula LBC1936 MESA_AFA_new MESA_CAU_new MESA_HIS_new NEO NFBC66 NFBC86 orcades PIVUS Raine RS1 RS2 RS3 SAPALDIA_Edinburgh SAPALDIA_Gabriel SHIP-1 SHIP-TREND-0 SHIP-TREND-0_B2 Split Twins_UK UKB_AFR UKB_AMR UKB_EAS UKB_EUR UKB_SAS UKHLS VIKING Vis YFS	0.445994	0.123148	0.460886	0.445099	0.441315	566519	566517	561849	421045	0.4438	0.4441	0.4425	0.4387	-0.0011	0.0035	-0.0011	-0.0158	0.0009	0.0011	0.0001	0.0031	0.2568	0.001378	1.699e-16	3.519e-07	SERTAD2(eQTL,PoPs,nearest), ACTR2(eQTL)
SPRED2	rs7597074	FALSE			2_66062059_C_T	2	66062059	FVC	FEV1,FVC	T	C	0.87	0.13	7.292	3.05e-13	++++++++++-+++++++++++-+-++-++---++-++-+++++++--+-	ALHS ALSPAC ARIC_AA ARIC_EA B58C BHS CHSAA CHSEA CKB EPIC EXCEED FHS FinnTwin GS20K H2000 HCHS hunt KORA_F4 KORA_S3 Korcula LBC1936 MESA_AFA_new MESA_CAU_new MESA_HIS_new NEO NFBC66 NFBC86 orcades PIVUS QBB Raine RS1 RS2 RS3 SAPALDIA_Edinburgh SAPALDIA_Gabriel SHIP-1 SHIP-TREND-0 SHIP-TREND-0_B2 Split Twins_UK UKB_AFR UKB_AMR UKB_EAS UKB_EUR UKB_SAS UKHLS VIKING Vis YFS	0.863375	0.859339	0.896962	0.941261	0.888867	581886	581884	577216	421045	0.8696	0.87	0.8669	0.8658	0.0081	0.0112	-0.0003	0.0105	0.0014	0.0016	0.0002	0.0045	2.907e-09	1.824e-12	0.1291	0.01865	SPRED2(PoPs,nearest)
LOC101060019	rs1116855	FALSE			2_67047812_A_G	2	67047812	FEV1	FEV1,FF	A	G	0.792	0.208	-6.416	1.4e-10	--+----+---------++----++---+-+--+---++--?---+-+-	ALHS ALSPAC ARIC_AA ARIC_EA B58C BHS CHSAA CHSEA CKB EPIC EXCEED FHS FinnTwin GS20K H2000 HCHS hunt KORA_F4 KORA_S3 Korcula LBC1936 MESA_AFA_new MESA_CAU_new MESA_HIS_new NEO NFBC66 NFBC86 orcades PIVUS Raine RS1 RS2 RS3 SAPALDIA_Edinburgh SAPALDIA_Gabriel SHIP-1 SHIP-TREND-0 SHIP-TREND-0_B2 Split Twins_UK UKB_AFR UKB_AMR UKB_EAS UKB_EUR UKB_SAS UKHLS VIKING Vis YFS	0.802447	0.823876	0.75663	0.855792	0.806466	581887	581885	577217	421045	0.7838	0.7816	0.7932	0.801	-0.0077	-0.0047	-0.0012	-0.0157	0.0011	0.0013	0.0002	0.0038	3.821e-12	0.0002569	3.585e-13	4.139e-05	LOC101060019(nearest), MEIS1(PoPs)
LOC101060019	rs13018626	FALSE			2_67087652_C_T	2	67087652	FEV1/FVC		T	C	0.0625	0.0625	-8.426	3.58e-17	+----++----+-++-+-----+---+-+--+--+-----+------++	ALHS ALSPAC ARIC_AA ARIC_EA B58C BHS CHSAA CHSEA CKB EPIC EXCEED FHS FinnTwin GS20K H2000 HCHS hunt KORA_F4 KORA_S3 Korcula LBC1936 MESA_AFA_new MESA_CAU_new MESA_HIS_new NEO NFBC66 NFBC86 orcades PIVUS Raine RS1 RS2 RS3 SAPALDIA_Edinburgh SAPALDIA_Gabriel SHIP-1 SHIP-TREND-0 SHIP-TREND-0_B2 Split Twins_UK UKB_AFR UKB_AMR UKB_EAS UKB_EUR UKB_SAS UKHLS VIKING Vis YFS	0.0668598	0.0248403	0.047954	0.0378842	0.115808	581882	581880	577212	421045	0.0626	0.0621	0.0651	0.0662	-0.009	-0.0012	-0.0024	-0.0265	0.0019	0.0022	0.0003	0.0062	2.612e-06	0.5799	3.601e-18	1.701e-05	LOC101060019(nearest), MEIS1(PoPs)
LOC101927661	rs1483339	FALSE			2_67462727_C_T	2	67462727	FEV1	FEV1,FF	T	C	0.246	0.246	-6.738	1.6e-11	+-----+---+---+--+---+++-----?--+--++-+--++--+-+-+	ALHS ALSPAC ARIC_AA ARIC_EA B58C BHS CHSAA CHSEA CKB EPIC EXCEED FHS FinnTwin GS20K H2000 HCHS hunt KORA_F4 KORA_S3 Korcula LBC1936 MESA_AFA_new MESA_CAU_new MESA_HIS_new NEO NFBC66 NFBC86 orcades PIVUS QBB Raine RS1 RS2 RS3 SAPALDIA_Edinburgh SAPALDIA_Gabriel SHIP-1 SHIP-TREND-0 SHIP-TREND-0_B2 Split Twins_UK UKB_AFR UKB_AMR UKB_EAS UKB_EUR UKB_SAS UKHLS VIKING Vis YFS	0.244274	0.082404	0.265038	0.198463	0.270944	570343	570341	565673	421045	0.2483	0.2488	0.2461	0.2519	-0.0069	-0.0049	-0.0009	-0.0153	0.0011	0.0012	0.0002	0.0036	7.455e-11	6.364e-05	2.013e-09	1.855e-05	AC023115.2(eQTL), ETAA1(PoPs), LOC101927661(nearest)
LOC101927661	rs34584544	FALSE			2_67466253_C_G	2	67466253	PEF		C	G	0.198	0.198	6.36	2.02e-10	++++++-+-+-+---+++++-+	ALSPAC ARIC_AA B58C EPIC FinnTwin hunt LBC1936 orcades Raine RS1 RS2 RS3 SHIP-1 SHIP-TREND-0 SHIP-TREND-0_B2 Split UKB_AFR UKB_AMR UKB_EAS UKB_EUR UKB_SAS VIKING	0.199399	0.0550796	0.387074	0.131988	0.160253	581889	581887	577219	421045	0.2386	0.2438	0.2141	0.1974	0.0068	0.0067	0.0006	0.0226	0.0011	0.0013	0.0002	0.0038	8.891e-10	1.708e-07	0.0002601	4.282e-09	ETAA1(PoPs), LOC101927661(nearest)
ANTXR1	rs10173269	TRUE	rs10173269	31911640	2_69407720_G_T	2	69407720	FEV1/FVC		T	G	0.488	0.488	-9.874	5.41e-23	----+-+------+-----++++---+--------+-----+------+-	ALHS ALSPAC ARIC_AA ARIC_EA B58C BHS CHSAA CHSEA CKB EPIC EXCEED FHS FinnTwin GS20K H2000 HCHS hunt KORA_F4 KORA_S3 Korcula LBC1936 MESA_AFA_new MESA_CAU_new MESA_HIS_new NEO NFBC66 NFBC86 orcades PIVUS QBB Raine RS1 RS2 RS3 SAPALDIA_Edinburgh SAPALDIA_Gabriel SHIP-1 SHIP-TREND-0 SHIP-TREND-0_B2 Split Twins_UK UKB_AFR UKB_AMR UKB_EAS UKB_EUR UKB_SAS UKHLS VIKING Vis YFS	0.537913	0.120535	0.213235	0.530736	0.32822	581882	581880	577212	421045	0.4915	0.4855	0.5193	0.5374	-0.002	0.0029	-0.0012	-0.0128	0.0009	0.0011	0.0001	0.0031	0.03133	0.00741	3.409e-20	3.349e-05	ANTXR1(PoPs,nearest)
GFPT1	rs12713676	FALSE			2_69521831_C_T	2	69521831	FVC		T	C	0.684	0.316	-6.923	4.42e-12	+---+--+---------+-+++---++-+---+-------++-----++-	ALHS ALSPAC ARIC_AA ARIC_EA B58C BHS CHSAA CHSEA CKB EPIC EXCEED FHS FinnTwin GS20K H2000 HCHS hunt KORA_F4 KORA_S3 Korcula LBC1936 MESA_AFA_new MESA_CAU_new MESA_HIS_new NEO NFBC66 NFBC86 orcades PIVUS QBB Raine RS1 RS2 RS3 SAPALDIA_Edinburgh SAPALDIA_Gabriel SHIP-1 SHIP-TREND-0 SHIP-TREND-0_B2 Split Twins_UK UKB_AFR UKB_AMR UKB_EAS UKB_EUR UKB_SAS UKHLS VIKING Vis YFS	0.655489	0.946702	0.817637	0.627623	0.775197	581878	581876	577208	421045	0.6784	0.6803	0.6638	0.6501	-0.0056	-0.0081	0.0003	-0.0077	0.001	0.0012	0.0001	0.0033	2.024e-08	5.583e-12	0.03256	0.01817	GFPT1(eQTL,nearest), ANTXR1(PoPs)
DYSF	rs7566581	FALSE			2_71782067_A_G	2	71782067	PEF		A	G	0.416	0.416	8.528	1.49e-17	+-++-+++---++-++++++--	ALSPAC ARIC_AA B58C EPIC FinnTwin hunt LBC1936 orcades Raine RS1 RS2 RS3 SHIP-1 SHIP-TREND-0 SHIP-TREND-0_B2 Split UKB_AFR UKB_AMR UKB_EAS UKB_EUR UKB_SAS VIKING	0.409727	0.494467	0.805951	0.364847	0.552058	581882	581880	577212	421045	0.4618	0.4679	0.4335	0.4223	-0.0008	-0.003	0.0005	0.0267	0.001	0.0011	0.0001	0.0031	0.3973	0.007572	0.0004757	8.572e-18	DYSF(PoPs,nearest)
REEP1	rs10195199	FALSE			2_86450140_C_T	2	86450140	FEV1/FVC		T	C	0.427	0.427	6.016	1.79e-09	++-++--++++++++++++++-++-++++++-+--++++++++-++-+-+	ALHS ALSPAC ARIC_AA ARIC_EA B58C BHS CHSAA CHSEA CKB EPIC EXCEED FHS FinnTwin GS20K H2000 HCHS hunt KORA_F4 KORA_S3 Korcula LBC1936 MESA_AFA_new MESA_CAU_new MESA_HIS_new NEO NFBC66 NFBC86 orcades PIVUS QBB Raine RS1 RS2 RS3 SAPALDIA_Edinburgh SAPALDIA_Gabriel SHIP-1 SHIP-TREND-0 SHIP-TREND-0_B2 Split Twins_UK UKB_AFR UKB_AMR UKB_EAS UKB_EUR UKB_SAS UKHLS VIKING Vis YFS	0.500371	0.0698627	0.0908242	0.480337	0.378283	581889	581887	577219	421045	0.4682	0.465	0.485	0.489	0.0006	-0.0036	0.0009	0.0045	0.001	0.0012	0.0001	0.0031	0.53	0.001784	2.395e-10	0.1438	REEP1(eQTL,nearest), GGCX(eQTL), IMMT(eQTL), KDM3A(PoPs), LOC90784(eQTL), MRPL35(eQTL), POLR1A(eQTL), PTCD3(eQTL), RNF103(eQTL), RP11-301O19.1(eQTL), ST3GAL5(eQTL)
EIF2AK3	rs7593335	FALSE			2_88878133_A_G	2	88878133	FEV1	FEV1,FVC	A	G	0.312	0.312	-6.892	5.48e-12	+-+----------+---+--+-++------+---------+------+++	ALHS ALSPAC ARIC_AA ARIC_EA B58C BHS CHSAA CHSEA CKB EPIC EXCEED FHS FinnTwin GS20K H2000 HCHS hunt KORA_F4 KORA_S3 Korcula LBC1936 MESA_AFA_new MESA_CAU_new MESA_HIS_new NEO NFBC66 NFBC86 orcades PIVUS QBB Raine RS1 RS2 RS3 SAPALDIA_Edinburgh SAPALDIA_Gabriel SHIP-1 SHIP-TREND-0 SHIP-TREND-0_B2 Split Twins_UK UKB_AFR UKB_AMR UKB_EAS UKB_EUR UKB_SAS UKHLS VIKING Vis YFS	0.28795	0.049285	0.487765	0.247924	0.420897	581868	581866	577198	421045	0.3269	0.3311	0.3051	0.298	-0.0067	-0.0077	-0.0002	0.0049	0.001	0.0011	0.0001	0.0034	6.925e-12	1.347e-11	0.09804	0.1435	EIF2AK3(PoPs,nearest), AC062029.1(eQTL)
LOC101927070	rs2276604	FALSE			2_99392745_C_T	2	99392745	FEV1/FVC		T	C	0.649	0.351	-6.572	4.95e-11	-+----+--++-+-------+++--+--+--+-++--+++--+----+-+	ALHS ALSPAC ARIC_AA ARIC_EA B58C BHS CHSAA CHSEA CKB EPIC EXCEED FHS FinnTwin GS20K H2000 HCHS hunt KORA_F4 KORA_S3 Korcula LBC1936 MESA_AFA_new MESA_CAU_new MESA_HIS_new NEO NFBC66 NFBC86 orcades PIVUS QBB Raine RS1 RS2 RS3 SAPALDIA_Edinburgh SAPALDIA_Gabriel SHIP-1 SHIP-TREND-0 SHIP-TREND-0_B2 Split Twins_UK UKB_AFR UKB_AMR UKB_EAS UKB_EUR UKB_SAS UKHLS VIKING Vis YFS	0.642202	0.617062	0.705964	0.596697	0.594498	581887	581885	577217	421045	0.6485	0.6495	0.6447	0.6454	-0.0015	0.0012	-0.0008	-0.0091	0.001	0.0011	0.0001	0.0032	0.1124	0.2797	4.32e-09	0.004414	INPP4A(PoPs), LOC101927070(nearest)
AFF3	rs56332326	TRUE	rs11887136	31911640	2_100573355_C_T	2	100573355	FEV1	FEV1,FVC	T	C	0.859	0.141	7.795	6.43e-15	+-++-+++?++--+++++-+-+++-++-+++-++--+-++++-++++++-	ALHS ALSPAC ARIC_AA ARIC_EA B58C BHS CHSAA CHSEA CKB EPIC EXCEED FHS FinnTwin GS20K H2000 HCHS hunt KORA_F4 KORA_S3 Korcula LBC1936 MESA_AFA_new MESA_CAU_new MESA_HIS_new NEO NFBC66 NFBC86 orcades PIVUS QBB Raine RS1 RS2 RS3 SAPALDIA_Edinburgh SAPALDIA_Gabriel SHIP-1 SHIP-TREND-0 SHIP-TREND-0_B2 Split Twins_UK UKB_AFR UKB_AMR UKB_EAS UKB_EUR UKB_SAS UKHLS VIKING Vis YFS	0.86451	0.594473	0.997889	0.904923	0.910952	496608	496606	491938	419481	0.8525	0.8519	0.8537	0.8589	0.0103	0.009	0.0011	0.0164	0.0014	0.0017	0.0002	0.0044	8.399e-13	1.08e-07	4.792e-08	0.0002302	AFF3(eQTL,PoPs,nearest), AC092667.2(eQTL), LONRF2(eQTL)
IL1RL1	rs12470864	TRUE	rs12470864	30804560	2_102926362_A_G	2	102926362	FEV1/FVC		A	G	0.379	0.379	-7.672	1.7e-14	-+++--+----+-------+-++-----+---+++-------++------	ALHS ALSPAC ARIC_AA ARIC_EA B58C BHS CHSAA CHSEA CKB EPIC EXCEED FHS FinnTwin GS20K H2000 HCHS hunt KORA_F4 KORA_S3 Korcula LBC1936 MESA_AFA_new MESA_CAU_new MESA_HIS_new NEO NFBC66 NFBC86 orcades PIVUS QBB Raine RS1 RS2 RS3 SAPALDIA_Edinburgh SAPALDIA_Gabriel SHIP-1 SHIP-TREND-0 SHIP-TREND-0_B2 Split Twins_UK UKB_AFR UKB_AMR UKB_EAS UKB_EUR UKB_SAS UKHLS VIKING Vis YFS	0.388034	0.126597	0.464999	0.336879	0.37075	581887	581885	577217	421045	0.3811	0.3807	0.3811	0.3776	-0.0041	-0.0007	-0.0011	-0.0072	0.0009	0.0011	0.0001	0.0032	1.285e-05	0.5235	2.906e-15	0.02195	IL1RL1(eQTL,pQTL,nearest), IL18R1(eQTL), IL1R1(PoPs)
ACOXL	rs72836346	FALSE			2_111876613_C_G	2	111876613	FEV1/FVC		C	G	0.0764	0.0764	-7.329	2.31e-13	--+--+++?+--+----+-+-+------+-+-+-----++-+++------	ALHS ALSPAC ARIC_AA ARIC_EA B58C BHS CHSAA CHSEA CKB EPIC EXCEED FHS FinnTwin GS20K H2000 HCHS hunt KORA_F4 KORA_S3 Korcula LBC1936 MESA_AFA_new MESA_CAU_new MESA_HIS_new NEO NFBC66 NFBC86 orcades PIVUS QBB Raine RS1 RS2 RS3 SAPALDIA_Edinburgh SAPALDIA_Gabriel SHIP-1 SHIP-TREND-0 SHIP-TREND-0_B2 Split Twins_UK UKB_AFR UKB_AMR UKB_EAS UKB_EUR UKB_SAS UKHLS VIKING Vis YFS	0.0786961	0.00828521	0.00214132	0.063956	0.016854	496584	496582	491914	419481	0.0788	0.0791	0.0791	0.0781	-0.0027	0.0044	-0.0018	-0.0126	0.002	0.0023	0.0003	0.0059	0.1741	0.05777	1.345e-11	0.03367	BCL2L11(eQTL,PoPs), AC108463.1(eQTL), AC108463.2(eQTL), ACOXL(nearest), MERTK(eQTL)
EPB41L5	rs4849821	FALSE			2_120855940_C_T	2	120855940	FEV1/FVC		T	C	0.728	0.272	-6.233	4.57e-10	+-+-+-+----+-++--+---+--+---++------+---+-+----+--	ALHS ALSPAC ARIC_AA ARIC_EA B58C BHS CHSAA CHSEA CKB EPIC EXCEED FHS FinnTwin GS20K H2000 HCHS hunt KORA_F4 KORA_S3 Korcula LBC1936 MESA_AFA_new MESA_CAU_new MESA_HIS_new NEO NFBC66 NFBC86 orcades PIVUS QBB Raine RS1 RS2 RS3 SAPALDIA_Edinburgh SAPALDIA_Gabriel SHIP-1 SHIP-TREND-0 SHIP-TREND-0_B2 Split Twins_UK UKB_AFR UKB_AMR UKB_EAS UKB_EUR UKB_SAS UKHLS VIKING Vis YFS	0.746465	0.310038	0.664593	0.782858	0.62636	581885	581883	577215	421045	0.7211	0.72	0.7289	0.7278	-0.0003	0.003	-0.001	-0.0035	0.001	0.0012	0.0002	0.0035	0.8035	0.01113	1.548e-10	0.309	EPB41L5(PoPs,nearest), CFAP221(rare_disease)
DARS-AS1	rs309137	FALSE			2_136765951_C_T	2	136765951	FVC	FEV1,FVC	T	C	0.672	0.328	-9.833	8.11e-23	--+---------------+--+----+---+-----+------+----+-	ALHS ALSPAC ARIC_AA ARIC_EA B58C BHS CHSAA CHSEA CKB EPIC EXCEED FHS FinnTwin GS20K H2000 HCHS hunt KORA_F4 KORA_S3 Korcula LBC1936 MESA_AFA_new MESA_CAU_new MESA_HIS_new NEO NFBC66 NFBC86 orcades PIVUS QBB Raine RS1 RS2 RS3 SAPALDIA_Edinburgh SAPALDIA_Gabriel SHIP-1 SHIP-TREND-0 SHIP-TREND-0_B2 Split Twins_UK UKB_AFR UKB_AMR UKB_EAS UKB_EUR UKB_SAS UKHLS VIKING Vis YFS	0.78	0.094994	0.358321	0.246509	0.354113	581889	581887	577219	421045	0.6334	0.6283	0.7013	0.7427	-0.0089	-0.0114	-0.0001	-0.0168	0.0011	0.0012	0.0002	0.0037	8.468e-17	8.822e-20	0.6787	4.609e-06	AC011893.3(eQTL), CXCR4(rare_disease), DARS-AS1(nearest), MCM6(eQTL), UBXN4(PoPs)
ARHGAP15	rs12691682	FALSE			2_144275787_A_G	2	144275787	FEV1/FVC		A	G	0.578	0.422	6.283	3.32e-10	-++---+++++++++-+-++++--++++++-+---++++-+++++++++	ALHS ALSPAC ARIC_AA ARIC_EA B58C BHS CHSAA CHSEA CKB EPIC EXCEED FHS FinnTwin GS20K H2000 HCHS hunt KORA_F4 KORA_S3 Korcula LBC1936 MESA_AFA_new MESA_CAU_new MESA_HIS_new NEO NFBC66 NFBC86 orcades PIVUS Raine RS1 RS2 RS3 SAPALDIA_Edinburgh SAPALDIA_Gabriel SHIP-1 SHIP-TREND-0 SHIP-TREND-0_B2 Split Twins_UK UKB_AFR UKB_AMR UKB_EAS UKB_EUR UKB_SAS UKHLS VIKING Vis YFS	0.610339	0.440062	0.423524	0.586331	0.508208	581882	581880	577212	421045	0.5612	0.5554	0.5869	0.5973	0.0011	-0.0022	0.0008	0.0256	0.0009	0.0011	0.0001	0.0032	0.2464	0.04303	4.446e-09	4.215e-16	ARHGAP15(nearest), GTDC1(PoPs)
ARHGAP15	rs11894956	FALSE			2_144336132_A_T	2	144336132	PEF		A	T	0.821	0.179	10.476	1.12e-25	?-???+??????????+++++?	ALSPAC ARIC_AA B58C EPIC FinnTwin hunt LBC1936 orcades Raine RS1 RS2 RS3 SHIP-1 SHIP-TREND-0 SHIP-TREND-0_B2 Split UKB_AFR UKB_AMR UKB_EAS UKB_EUR UKB_SAS VIKING	0.821571	0.833508	0.809028	0.855212	0.824136	464518	464518	464518	365467	0.8173	0.8168	0.819	0.8192	0.0014	-0.0018	0.0007	0.0487	0.0013	0.0016	0.0002	0.0045	0.2864	0.2558	8.149e-05	2.963e-27	ARHGAP15(PoPs,nearest)
RND3	rs72855705	FALSE			2_151018807_C_T	2	151018807	PEF	PEF,FEV1,FF	T	C	0.957	0.043	-9.91	3.77e-23	----+-+--+--++----+-+-	ALSPAC ARIC_AA B58C EPIC FinnTwin hunt LBC1936 orcades Raine RS1 RS2 RS3 SHIP-1 SHIP-TREND-0 SHIP-TREND-0_B2 Split UKB_AFR UKB_AMR UKB_EAS UKB_EUR UKB_SAS VIKING	0.955732	0.997464	0.998455	0.979661	0.987116	484366	484364	479696	419481	0.9558	0.9558	0.9558	0.9564	-0.0161	-0.0059	-0.0032	-0.0776	0.0026	0.003	0.0003	0.0077	3.329e-10	0.04966	1.07e-19	7.96e-24	RND3(PoPs,nearest)
NEB	rs10172023	FALSE			2_152476028_C_G	2	152476028	FEV1/FVC		C	G	0.671	0.329	-5.872	4.31e-09	++-----+++-+------+--+-+-----+--+---+-+---+---+	ALHS ALSPAC ARIC_AA ARIC_EA B58C BHS CHSAA CHSEA EPIC EXCEED FHS FinnTwin GS20K H2000 HCHS hunt KORA_F4 KORA_S3 Korcula LBC1936 MESA_AFA_new MESA_CAU_new MESA_HIS_new NEO NFBC66 NFBC86 orcades PIVUS Raine RS1 RS2 RS3 SAPALDIA_Edinburgh SAPALDIA_Gabriel SHIP-1 SHIP-TREND-0 SHIP-TREND-0_B2 Split Twins_UK UKB_AFR UKB_AMR UKB_EUR UKB_SAS UKHLS VIKING Vis YFS	0.665059	0.883724	0.755754	0.756433	0.796019	581886	581884	577216	421045	0.6805	0.6812	0.6738	0.6729	0.0008	0.0045	-0.0008	-0.0034	0.001	0.0011	0.0001	0.0032	0.4172	6.97e-05	3.518e-09	0.2987	RIF1(WES,PoPs), NEB(nearest)
LOC101929378	rs72902175	TRUE	rs72904209	30061609	2_157013035_C_T	2	157013035	FEV1/FVC	FEV1,FF	T	C	0.115	0.115	-10.514	7.43e-26	-----+------------+--+--------+--+---+-++--+-----+	ALHS ALSPAC ARIC_AA ARIC_EA B58C BHS CHSAA CHSEA CKB EPIC EXCEED FHS FinnTwin GS20K H2000 HCHS hunt KORA_F4 KORA_S3 Korcula LBC1936 MESA_AFA_new MESA_CAU_new MESA_HIS_new NEO NFBC66 NFBC86 orcades PIVUS QBB Raine RS1 RS2 RS3 SAPALDIA_Edinburgh SAPALDIA_Gabriel SHIP-1 SHIP-TREND-0 SHIP-TREND-0_B2 Split Twins_UK UKB_AFR UKB_AMR UKB_EAS UKB_EUR UKB_SAS UKHLS VIKING Vis YFS	0.134434	0.0158347	0.0256707	0.115905	0.142679	581887	581885	577217	421045	0.1258	0.1252	0.1303	0.1311	-0.0146	-0.0091	-0.0021	-0.0256	0.0015	0.0017	0.0002	0.0045	1.781e-23	1.151e-07	5.672e-25	1.626e-08	LOC101929378(nearest), NR4A2(PoPs)
GPD2	rs16840719	FALSE			2_157551242_C_T	2	157551242	FVC		T	C	0.218	0.218	6.39	1.65e-10	-+++-+-+++++-+-+++--+-+++++++-++--+------++++++-++	ALHS ALSPAC ARIC_AA ARIC_EA B58C BHS CHSAA CHSEA CKB EPIC EXCEED FHS FinnTwin GS20K H2000 HCHS hunt KORA_F4 KORA_S3 Korcula LBC1936 MESA_AFA_new MESA_CAU_new MESA_HIS_new NEO NFBC66 NFBC86 orcades PIVUS QBB Raine RS1 RS2 RS3 SAPALDIA_Edinburgh SAPALDIA_Gabriel SHIP-1 SHIP-TREND-0 SHIP-TREND-0_B2 Split Twins_UK UKB_AFR UKB_AMR UKB_EAS UKB_EUR UKB_SAS UKHLS VIKING Vis YFS	0.225927	0.0242452	0.206999	0.198665	0.0971171	581881	581879	577211	421045	0.2206	0.2206	0.2223	0.2196	0.0077	0.008	0.0004	0.0165	0.0011	0.0013	0.0002	0.0037	2.675e-12	3.933e-10	0.01161	8.745e-06	GPD2(PoPs,nearest)
RBMS1	rs10208158	TRUE	rs7424771	30804560	2_161331081_C_T	2	161331081	FEV1	PEF,FEV1	T	C	0.417	0.417	7.207	5.74e-13	---+++--++-+-+++++++-+-+-+-++-++++-++-+-+-+-++++++	ALHS ALSPAC ARIC_AA ARIC_EA B58C BHS CHSAA CHSEA CKB EPIC EXCEED FHS FinnTwin GS20K H2000 HCHS hunt KORA_F4 KORA_S3 Korcula LBC1936 MESA_AFA_new MESA_CAU_new MESA_HIS_new NEO NFBC66 NFBC86 orcades PIVUS QBB Raine RS1 RS2 RS3 SAPALDIA_Edinburgh SAPALDIA_Gabriel SHIP-1 SHIP-TREND-0 SHIP-TREND-0_B2 Split Twins_UK UKB_AFR UKB_AMR UKB_EAS UKB_EUR UKB_SAS UKHLS VIKING Vis YFS	0.468133	0.537468	0.125807	0.534995	0.395195	581889	581887	577219	421045	0.443	0.44	0.4602	0.4657	0.0062	0.0052	0.0007	0.0206	0.001	0.0011	0.0001	0.0031	1.178e-10	4.892e-06	4.363e-07	1.435e-11	RBMS1(PoPs,nearest), PLA2R1(pQTL)
CERS6	rs6433080	TRUE	rs10184235	31911640	2_169496830_A_G	2	169496830	FEV1/FVC	PEF,FEV1,FF	A	G	0.766	0.234	-8.489	2.09e-17	------++--+-+------+++-+--++--+-----+---++-+---+--	ALHS ALSPAC ARIC_AA ARIC_EA B58C BHS CHSAA CHSEA CKB EPIC EXCEED FHS FinnTwin GS20K H2000 HCHS hunt KORA_F4 KORA_S3 Korcula LBC1936 MESA_AFA_new MESA_CAU_new MESA_HIS_new NEO NFBC66 NFBC86 orcades PIVUS QBB Raine RS1 RS2 RS3 SAPALDIA_Edinburgh SAPALDIA_Gabriel SHIP-1 SHIP-TREND-0 SHIP-TREND-0_B2 Split Twins_UK UKB_AFR UKB_AMR UKB_EAS UKB_EUR UKB_SAS UKHLS VIKING Vis YFS	0.761726	0.486873	0.838823	0.781764	0.528203	581887	581885	577217	421045	0.7626	0.7636	0.7566	0.757	-0.0058	-0.002	-0.0013	-0.0203	0.0011	0.0013	0.0002	0.0036	7.129e-08	0.1164	2.835e-16	1.323e-08	CERS6(PoPs,nearest)
DCAF17	rs72237176	FALSE			2_172342684_C_CT	2	172342684	FEV1/FVC		CT	C	0.334	0.334	-5.947	2.73e-09	??????????????-?-??????????????????????????-?????	ALHS ALSPAC ARIC_AA ARIC_EA B58C BHS CHSAA CHSEA CKB EPIC EXCEED FHS FinnTwin GS20K H2000 HCHS hunt KORA_F4 KORA_S3 Korcula LBC1936 MESA_AFA_new MESA_CAU_new MESA_HIS_new NEO NFBC66 NFBC86 orcades PIVUS Raine RS1 RS2 RS3 SAPALDIA_Edinburgh SAPALDIA_Gabriel SHIP-1 SHIP-TREND-0 SHIP-TREND-0_B2 Split Twins_UK UKB_AFR UKB_AMR UKB_EAS UKB_EUR UKB_SAS UKHLS VIKING Vis YFS	0.333755	0.262021	0.238366	0.336199	0.351296	365205	365205	365205	349869	0.3327	0.3328	0.333	0.3329	-0.0009	0.0031	-0.0009	-0.0048	0.0013	0.0015	0.0002	0.0037	0.4872	0.04138	5.75e-08	0.1956	CYBRD1(PoPs), DCAF17(nearest), GAD1(eQTL), TLK1(eQTL)
MLK7-AS1	rs4972534	FALSE			2_174072081_A_G	2	174072081	FEV1/FVC		A	G	0.408	0.408	-8.705	3.18e-18	-++---+------------+++-+--+---------++++--------+-	ALHS ALSPAC ARIC_AA ARIC_EA B58C BHS CHSAA CHSEA CKB EPIC EXCEED FHS FinnTwin GS20K H2000 HCHS hunt KORA_F4 KORA_S3 Korcula LBC1936 MESA_AFA_new MESA_CAU_new MESA_HIS_new NEO NFBC66 NFBC86 orcades PIVUS QBB Raine RS1 RS2 RS3 SAPALDIA_Edinburgh SAPALDIA_Gabriel SHIP-1 SHIP-TREND-0 SHIP-TREND-0_B2 Split Twins_UK UKB_AFR UKB_AMR UKB_EAS UKB_EUR UKB_SAS UKHLS VIKING Vis YFS	0.348795	0.816709	0.634842	0.415985	0.294243	581885	581883	577215	421045	0.4203	0.4274	0.3856	0.3558	-0.0035	-0.0002	-0.001	-0.0093	0.0009	0.0011	0.0001	0.0032	0.000211	0.8458	3.439e-13	0.003713	MLTK(eQTL,PoPs), CDCA7(rare_disease), MLK7-AS1(nearest), ZAK(eQTL)
HAGLR	rs966801	FALSE			2_177037827_A_G	2	177037827	FEV1/FVC		A	G	0.435	0.435	5.942	2.81e-09	-+++++++++++--++++++---+++-++-+++-+-+++---+-++++--	ALHS ALSPAC ARIC_AA ARIC_EA B58C BHS CHSAA CHSEA CKB EPIC EXCEED FHS FinnTwin GS20K H2000 HCHS hunt KORA_F4 KORA_S3 Korcula LBC1936 MESA_AFA_new MESA_CAU_new MESA_HIS_new NEO NFBC66 NFBC86 orcades PIVUS QBB Raine RS1 RS2 RS3 SAPALDIA_Edinburgh SAPALDIA_Gabriel SHIP-1 SHIP-TREND-0 SHIP-TREND-0_B2 Split Twins_UK UKB_AFR UKB_AMR UKB_EAS UKB_EUR UKB_SAS UKHLS VIKING Vis YFS	0.368185	0.706743	0.745868	0.361076	0.68298	581886	581884	577216	421045	0.4458	0.4497	0.4041	0.3784	0.0031	0.001	0.0008	0.0097	0.0009	0.0011	0.0001	0.0032	0.001196	0.3737	3.675e-09	0.002309	AC009336.24(eQTL), HAGLR(nearest), HOXD4(PoPs)
AGPS	rs566625249	TRUE	rs6740092	31911640	2_178380678_T_TG	2	178380678	FVC	FEV1,FVC	T	TG	0.866	0.134	7.489	6.96e-14	??????????????-++????+?-?????+???????????+-++-????	ALHS ALSPAC ARIC_AA ARIC_EA B58C BHS CHSAA CHSEA CKB EPIC EXCEED FHS FinnTwin GS20K H2000 HCHS hunt KORA_F4 KORA_S3 Korcula LBC1936 MESA_AFA_new MESA_CAU_new MESA_HIS_new NEO NFBC66 NFBC86 orcades PIVUS QBB Raine RS1 RS2 RS3 SAPALDIA_Edinburgh SAPALDIA_Gabriel SHIP-1 SHIP-TREND-0 SHIP-TREND-0_B2 Split Twins_UK UKB_AFR UKB_AMR UKB_EAS UKB_EUR UKB_SAS UKHLS VIKING Vis YFS	0.865727	0.799763	0.932334	0.861982	0.902555	377983	377983	377983	362647	0.8654	0.865	0.8652	0.8649	0.0115	0.0155	-0.0001	0.0218	0.0017	0.002	0.0002	0.0051	2.917e-11	3.505e-14	0.6048	1.749e-05	AGPS(eQTL,nearest), NFE2L2(PoPs), TTC30A(mouse_KO), TTC30B(mouse_KO)
TTN	rs35770984	TRUE	rs2304340	30804560	2_179626080_A_T	2	179626080	FVC	FEV1,FVC	A	T	0.331	0.331	6.7	2.08e-11	-++	H2000 hunt UKB_EUR	0.330414	0.150149	0.0682814	0.264715	0.215635	581887	581885	577217	421045	0.3137	0.3124	0.3229	0.3228	0.0058	0.0072	0.0001	0.0086	0.001	0.0012	0.0001	0.0033	4.14e-08	5.725e-09	0.4601	0.009064	TTN(rare_disease,PoPs,nearest), FKBP7(eQTL), RP11-171I2.2(eQTL)
ITGAV	rs9333290	TRUE	rs2084448	30804560	2_187519338_G_T	2	187519338	FEV1/FVC		T	G	0.239	0.239	-8.735	2.45e-18	----+-+---+-------++-+-----+-----+------+----+--++	ALHS ALSPAC ARIC_AA ARIC_EA B58C BHS CHSAA CHSEA CKB EPIC EXCEED FHS FinnTwin GS20K H2000 HCHS hunt KORA_F4 KORA_S3 Korcula LBC1936 MESA_AFA_new MESA_CAU_new MESA_HIS_new NEO NFBC66 NFBC86 orcades PIVUS QBB Raine RS1 RS2 RS3 SAPALDIA_Edinburgh SAPALDIA_Gabriel SHIP-1 SHIP-TREND-0 SHIP-TREND-0_B2 Split Twins_UK UKB_AFR UKB_AMR UKB_EAS UKB_EUR UKB_SAS UKHLS VIKING Vis YFS	0.278548	0.0165602	0.0441176	0.297534	0.241803	581888	581886	577218	421045	0.2652	0.2634	0.2723	0.2742	-0.0012	0.0048	-0.0014	-0.0092	0.0011	0.0013	0.0002	0.0034	0.2933	0.000243	2.964e-19	0.007498	ITGAV(eQTL,PoPs,nearest)
TMEM194B	rs34243574	FALSE			2_191429885_A_AT	2	191429885	PEF		A	AT	0.69	0.31	-8.348	6.94e-17	?-??????????????--+--?	ALSPAC ARIC_AA B58C EPIC FinnTwin hunt LBC1936 orcades Raine RS1 RS2 RS3 SHIP-1 SHIP-TREND-0 SHIP-TREND-0_B2 Split UKB_AFR UKB_AMR UKB_EAS UKB_EUR UKB_SAS VIKING	0.683697	0.916184	0.884149	0.806237	0.652705	431596	431596	431596	336335	0.7127	0.716	0.6945	0.6859	-0.0057	-0.006	-0.0002	-0.0321	0.0013	0.0015	0.0002	0.0039	7.406e-06	5.701e-05	0.2194	9.039e-17	NAB1(eQTL,PoPs), STAT1(eQTL,rare_disease), TMEM194B(eQTL,nearest), AC006460.2(eQTL), ENSG00000284052(eQTL), GLS(eQTL), HIBCH(eQTL), INPP1(eQTL), MFSD6(eQTL)
SATB2	rs1249096	TRUE	rs1249096	30804560	2_199723365_A_G	2	199723365	FVC	FEV1,FVC	A	G	0.504	0.496	9.739	2.05e-22	+-++++-+++?+-+++++---+-+-++++++-++++-+------+++-+-	ALHS ALSPAC ARIC_AA ARIC_EA B58C BHS CHSAA CHSEA CKB EPIC EXCEED FHS FinnTwin GS20K H2000 HCHS hunt KORA_F4 KORA_S3 Korcula LBC1936 MESA_AFA_new MESA_CAU_new MESA_HIS_new NEO NFBC66 NFBC86 orcades PIVUS QBB Raine RS1 RS2 RS3 SAPALDIA_Edinburgh SAPALDIA_Gabriel SHIP-1 SHIP-TREND-0 SHIP-TREND-0_B2 Split Twins_UK UKB_AFR UKB_AMR UKB_EAS UKB_EUR UKB_SAS UKHLS VIKING Vis YFS	0.561992	0.626367	0.185023	0.499269	0.351439	581881	581879	577211	421045	0.5157	0.5105	0.5453	0.5535	0.0077	0.0103	-0.0002	0.0011	0.001	0.0011	0.0001	0.0031	4.924e-16	2.824e-20	0.2653	0.718	SATB2(PoPs,nearest), FTCDNL1(eQTL)
SPATS2L	rs985256	TRUE	rs985256	30804560	2_201208692_A_C	2	201208692	FEV1/FVC	FEV1,FF	A	C	0.218	0.218	7.072	1.53e-12	+-++++-+++-+-++++++-+++-+-+++-+--+-+++-+++--++++++	ALHS ALSPAC ARIC_AA ARIC_EA B58C BHS CHSAA CHSEA CKB EPIC EXCEED FHS FinnTwin GS20K H2000 HCHS hunt KORA_F4 KORA_S3 Korcula LBC1936 MESA_AFA_new MESA_CAU_new MESA_HIS_new NEO NFBC66 NFBC86 orcades PIVUS QBB Raine RS1 RS2 RS3 SAPALDIA_Edinburgh SAPALDIA_Gabriel SHIP-1 SHIP-TREND-0 SHIP-TREND-0_B2 Split Twins_UK UKB_AFR UKB_AMR UKB_EAS UKB_EUR UKB_SAS UKHLS VIKING Vis YFS	0.217278	0.811108	0.192533	0.206582	0.09816	581889	581887	577219	421045	0.2198	0.2187	0.2245	0.2346	0.0063	0.0038	0.001	0.0157	0.0011	0.0013	0.0002	0.0037	2.049e-08	0.003905	8.552e-11	2.278e-05	SPATS2L(eQTL,PoPs,nearest)
KIAA2012	rs6747814	TRUE	rs12997625	30804560	2_202980718_A_G	2	202980718	FVC		A	G	0.522	0.478	6.457	1.07e-10	-+--+++-++?+++++++++--++-++++-++--++++-+--+++--+--	ALHS ALSPAC ARIC_AA ARIC_EA B58C BHS CHSAA CHSEA CKB EPIC EXCEED FHS FinnTwin GS20K H2000 HCHS hunt KORA_F4 KORA_S3 Korcula LBC1936 MESA_AFA_new MESA_CAU_new MESA_HIS_new NEO NFBC66 NFBC86 orcades PIVUS QBB Raine RS1 RS2 RS3 SAPALDIA_Edinburgh SAPALDIA_Gabriel SHIP-1 SHIP-TREND-0 SHIP-TREND-0_B2 Split Twins_UK UKB_AFR UKB_AMR UKB_EAS UKB_EUR UKB_SAS UKHLS VIKING Vis YFS	0.469297	0.552401	0.781329	0.609055	0.412426	581889	581887	577219	421045	0.5167	0.5206	0.4905	0.4813	0.005	0.0071	-0.0002	0.0042	0.0009	0.0011	0.0001	0.0031	9.946e-08	1.013e-10	0.1904	0.1724	BMPR2(eQTL,rare_disease), AC064836.3(eQTL), KIAA2012(nearest), NOP58(eQTL), RP11-686O6.1(eQTL), SUMO1(PoPs), TMEM237(rare_disease)
NRP2	rs2241153	FALSE			2_206636123_A_C	2	206636123	FEV1/FVC		A	C	0.383	0.383	-5.914	3.34e-09	++--++-------+---+-++++-----++-+--------+--+--+--+	ALHS ALSPAC ARIC_AA ARIC_EA B58C BHS CHSAA CHSEA CKB EPIC EXCEED FHS FinnTwin GS20K H2000 HCHS hunt KORA_F4 KORA_S3 Korcula LBC1936 MESA_AFA_new MESA_CAU_new MESA_HIS_new NEO NFBC66 NFBC86 orcades PIVUS QBB Raine RS1 RS2 RS3 SAPALDIA_Edinburgh SAPALDIA_Gabriel SHIP-1 SHIP-TREND-0 SHIP-TREND-0_B2 Split Twins_UK UKB_AFR UKB_AMR UKB_EAS UKB_EUR UKB_SAS UKHLS VIKING Vis YFS	0.402851	0.22484	0.318762	0.291351	0.235804	581889	581887	577219	421045	0.3826	0.3815	0.3912	0.3944	-0.0027	-0.0002	-0.0008	-0.0067	0.001	0.0011	0.0001	0.0032	0.005399	0.8298	3.116e-09	0.03434	NRP2(eQTL,PoPs,nearest), NDUFS1(rare_disease)
CCNYL1	rs62189212	FALSE			2_208614825_A_G	2	208614825	FEV1		A	G	0.0133	0.0133	-6.05	1.45e-09	--?--+?-?---+---+-++-?+----+-----+-+++--?-?--+++?	ALHS ALSPAC ARIC_AA ARIC_EA B58C BHS CHSAA CHSEA CKB EPIC EXCEED FHS FinnTwin GS20K H2000 HCHS hunt KORA_F4 KORA_S3 Korcula LBC1936 MESA_AFA_new MESA_CAU_new MESA_HIS_new NEO NFBC66 NFBC86 orcades PIVUS Raine RS1 RS2 RS3 SAPALDIA_Edinburgh SAPALDIA_Gabriel SHIP-1 SHIP-TREND-0 SHIP-TREND-0_B2 Split Twins_UK UKB_AFR UKB_AMR UKB_EAS UKB_EUR UKB_SAS UKHLS VIKING Vis YFS	0.0131902	0.00150016	1.50444e-05	0.0459116	0.0385985	483510	483507	478841	418034	0.0174	0.0169	0.0161	0.0144	-0.0258	-0.028	-0.0013	-0.042	0.0044	0.0052	0.0006	0.0134	3.419e-09	6.842e-08	0.02841	0.001763	CCNYL1(nearest), CREB1(PoPs)
MAP2	rs13425141	FALSE			2_210322212_C_G	2	210322212	FVC	FEV1,FVC	C	G	0.239	0.239	-7.356	1.89e-13	-++-----+-?----+---+--++---------+--+--+--+-----++	ALHS ALSPAC ARIC_AA ARIC_EA B58C BHS CHSAA CHSEA CKB EPIC EXCEED FHS FinnTwin GS20K H2000 HCHS hunt KORA_F4 KORA_S3 Korcula LBC1936 MESA_AFA_new MESA_CAU_new MESA_HIS_new NEO NFBC66 NFBC86 orcades PIVUS QBB Raine RS1 RS2 RS3 SAPALDIA_Edinburgh SAPALDIA_Gabriel SHIP-1 SHIP-TREND-0 SHIP-TREND-0_B2 Split Twins_UK UKB_AFR UKB_AMR UKB_EAS UKB_EUR UKB_SAS UKHLS VIKING Vis YFS	0.288911	0.0736804	0.0110363	0.273055	0.310405	581878	581876	577208	421045	0.2784	0.2779	0.2814	0.2806	-0.0065	-0.0098	0.0003	-0.0079	0.0011	0.0013	0.0002	0.0034	5.146e-09	1.507e-13	0.03042	0.02122	MAP2(eQTL,PoPs,nearest)
IGFBP5	rs8179795	TRUE	rs6435952	30804560	2_217613285_C_T	2	217613285	FEV1/FVC	FEV1,FF	T	C	0.844	0.156	-8.892	6e-19	+-------------+--+-+-+--+---+++--++------+----++-	ALHS ALSPAC ARIC_AA ARIC_EA B58C BHS CHSAA CHSEA CKB EPIC EXCEED FHS FinnTwin GS20K H2000 HCHS hunt KORA_F4 KORA_S3 Korcula LBC1936 MESA_AFA_new MESA_CAU_new MESA_HIS_new NEO NFBC66 NFBC86 orcades PIVUS Raine RS1 RS2 RS3 SAPALDIA_Edinburgh SAPALDIA_Gabriel SHIP-1 SHIP-TREND-0 SHIP-TREND-0_B2 Split Twins_UK UKB_AFR UKB_AMR UKB_EAS UKB_EUR UKB_SAS UKHLS VIKING Vis YFS	0.852082	0.674127	0.812853	0.933202	0.868605	581889	581887	577219	421045	0.8361	0.8352	0.84	0.8371	-0.0081	-0.0046	-0.0014	-0.0181	0.0012	0.0014	0.0002	0.0043	7.25e-11	0.001488	3.443e-15	2.181e-05	IGFBP5(PoPs,nearest), SMARCAL1(rare_disease)
TNS1	rs2571445	TRUE	rs2571445	20010834	2_218683154_A_G	2	218683154	FEV1	FEV1,FVC,FF	A	G	0.391	0.391	-14.722	4.65e-49	+-----+----------------+-----+---+-+-----+------+-	ALHS ALSPAC ARIC_AA ARIC_EA B58C BHS CHSAA CHSEA CKB EPIC EXCEED FHS FinnTwin GS20K H2000 HCHS hunt KORA_F4 KORA_S3 Korcula LBC1936 MESA_AFA_new MESA_CAU_new MESA_HIS_new NEO NFBC66 NFBC86 orcades PIVUS QBB Raine RS1 RS2 RS3 SAPALDIA_Edinburgh SAPALDIA_Gabriel SHIP-1 SHIP-TREND-0 SHIP-TREND-0_B2 Split Twins_UK UKB_AFR UKB_AMR UKB_EAS UKB_EUR UKB_SAS UKHLS VIKING Vis YFS	0.396459	0.169742	0.39578	0.348642	0.43548	581889	581887	577219	421045	0.3927	0.393	0.3934	0.3982	-0.0132	-0.012	-0.0013	-0.0169	0.0009	0.0011	0.0001	0.0031	1.409e-46	1.454e-28	8.749e-22	7.053e-08	TNS1(eQTL,PoPs,credible,nearest), CXCR2(rare_disease), DIRC3(eQTL)
SPEG	rs7564856	FALSE			2_220297038_A_G	2	220297038	FEV1/FVC	FEV1,FF	A	G	0.658	0.342	-6.675	2.48e-11	---+++-----++-----++++-+-+-+-------------------+-	ALHS ALSPAC ARIC_AA ARIC_EA B58C BHS CHSAA CHSEA CKB EPIC EXCEED FHS FinnTwin GS20K H2000 HCHS hunt KORA_F4 KORA_S3 Korcula LBC1936 MESA_AFA_new MESA_CAU_new MESA_HIS_new NEO NFBC66 NFBC86 orcades PIVUS Raine RS1 RS2 RS3 SAPALDIA_Edinburgh SAPALDIA_Gabriel SHIP-1 SHIP-TREND-0 SHIP-TREND-0_B2 Split Twins_UK UKB_AFR UKB_AMR UKB_EAS UKB_EUR UKB_SAS UKHLS VIKING Vis YFS	0.647399	0.0896617	0.778772	0.558971	0.699063	581865	581863	577195	421045	0.661	0.6636	0.6499	0.6353	-0.0048	-0.0022	-0.0009	-0.0146	0.001	0.0011	0.0001	0.0032	1.158e-06	0.05266	4.236e-10	5.509e-06	SPEG(PoPs,nearest), DES(eQTL), ENSG00000280323(eQTL), SLC23A3(mouse_KO)
ASIC4	rs4674407	TRUE	rs4674407	30804560	2_220382700_C_T	2	220382700	FVC		T	C	0.464	0.464	-6.561	5.35e-11	--+--------+---------+-------+--++--+--+++------	ALHS ALSPAC ARIC_AA ARIC_EA B58C BHS CHSAA CHSEA CKB EPIC FHS FinnTwin GS20K H2000 HCHS hunt KORA_F4 KORA_S3 Korcula LBC1936 MESA_AFA_new MESA_CAU_new MESA_HIS_new NEO NFBC66 NFBC86 orcades PIVUS Raine RS1 RS2 RS3 SAPALDIA_Edinburgh SAPALDIA_Gabriel SHIP-1 SHIP-TREND-0 SHIP-TREND-0_B2 Split Twins_UK UKB_AFR UKB_AMR UKB_EAS UKB_EUR UKB_SAS UKHLS VIKING Vis YFS	0.499042	0.390417	0.242925	0.482472	0.611516	581878	581876	577208	421045	0.4611	0.4574	0.4822	0.492	-0.0039	-0.0075	0.0005	-0.0046	0.0009	0.0011	0.0001	0.0031	2.856e-05	9.175e-12	4.148e-05	0.1335	ASIC4(nearest), CYP27A1(eQTL), SPEG(PoPs), TMEM198(eQTL)
NYAP2	rs75496245	FALSE			2_226693946_C_G	2	226693946	FVC		C	G	0.124	0.124	6.092	1.11e-09	++--++++++?-+++++++++-+-++++-+++-++++-+--+++++++++	ALHS ALSPAC ARIC_AA ARIC_EA B58C BHS CHSAA CHSEA CKB EPIC EXCEED FHS FinnTwin GS20K H2000 HCHS hunt KORA_F4 KORA_S3 Korcula LBC1936 MESA_AFA_new MESA_CAU_new MESA_HIS_new NEO NFBC66 NFBC86 orcades PIVUS QBB Raine RS1 RS2 RS3 SAPALDIA_Edinburgh SAPALDIA_Gabriel SHIP-1 SHIP-TREND-0 SHIP-TREND-0_B2 Split Twins_UK UKB_AFR UKB_AMR UKB_EAS UKB_EUR UKB_SAS UKHLS VIKING Vis YFS	0.125063	0.0839403	0.114565	0.0787278	0.119738	581888	581886	577218	421045	0.1249	0.1248	0.1267	0.1237	0.0058	0.0096	-0.0004	0.0016	0.0014	0.0016	0.0002	0.0046	2.562e-05	2.143e-09	0.04032	0.7243	NYAP2(PoPs,nearest)
PID1	rs12620170	TRUE	rs10498230	20010835	2_229548340_C_T	2	229548340	FEV1/FVC	PEF,FEV1,FF	T	C	0.0885	0.0885	19.084	3.45e-81	++++++-++++++++++-+-+-++++++-+-++++--+++++++++++++	ALHS ALSPAC ARIC_AA ARIC_EA B58C BHS CHSAA CHSEA CKB EPIC EXCEED FHS FinnTwin GS20K H2000 HCHS hunt KORA_F4 KORA_S3 Korcula LBC1936 MESA_AFA_new MESA_CAU_new MESA_HIS_new NEO NFBC66 NFBC86 orcades PIVUS QBB Raine RS1 RS2 RS3 SAPALDIA_Edinburgh SAPALDIA_Gabriel SHIP-1 SHIP-TREND-0 SHIP-TREND-0_B2 Split Twins_UK UKB_AFR UKB_AMR UKB_EAS UKB_EUR UKB_SAS UKHLS VIKING Vis YFS	0.0788939	0.0653474	0.132802	0.0473447	0.14746	581888	581886	577218	421045	0.101	0.1031	0.0877	0.0789	0.0121	-0.0011	0.0045	0.045	0.0016	0.0018	0.0002	0.0057	1.585e-14	0.562	7.476e-77	2.182e-15	PID1(PoPs,nearest), SPHKAP(eQTL)
DNER	rs114643265	FALSE			2_230255577_A_G	2	230255577	FEV1/FVC		A	G	0.979	0.021	-7.094	1.31e-12	--?-+-?-?------?--+--?+?--+-+--+-++-----???-+--++	ALHS ALSPAC ARIC_AA ARIC_EA B58C BHS CHSAA CHSEA CKB EPIC EXCEED FHS FinnTwin GS20K H2000 HCHS hunt KORA_F4 KORA_S3 Korcula LBC1936 MESA_AFA_new MESA_CAU_new MESA_HIS_new NEO NFBC66 NFBC86 orcades PIVUS Raine RS1 RS2 RS3 SAPALDIA_Edinburgh SAPALDIA_Gabriel SHIP-1 SHIP-TREND-0 SHIP-TREND-0_B2 Split Twins_UK UKB_AFR UKB_AMR UKB_EAS UKB_EUR UKB_SAS UKHLS VIKING Vis YFS	0.978225	0.999275	0.999896	0.994066	0.995931	479215	479213	474545	414346	0.9787	0.9786	0.9785	0.9788	-0.0134	-0.0043	-0.0027	-0.0296	0.0037	0.0043	0.0005	0.011	0.0002669	0.3179	3.979e-08	0.006982	DNER(nearest), PID1(PoPs)
DNER	rs1862106	TRUE	rs207672	31911640	2_230267680_A_G	2	230267680	FEV1/FVC		A	G	0.306	0.306	10.573	3.99e-26	++++++++++++++++++-+++++++++++--++++--+--+++++++-	ALHS ALSPAC ARIC_AA ARIC_EA B58C BHS CHSAA CHSEA CKB EPIC EXCEED FHS FinnTwin GS20K H2000 HCHS hunt KORA_F4 KORA_S3 Korcula LBC1936 MESA_AFA_new MESA_CAU_new MESA_HIS_new NEO NFBC66 NFBC86 orcades PIVUS Raine RS1 RS2 RS3 SAPALDIA_Edinburgh SAPALDIA_Gabriel SHIP-1 SHIP-TREND-0 SHIP-TREND-0_B2 Split Twins_UK UKB_AFR UKB_AMR UKB_EAS UKB_EUR UKB_SAS UKHLS VIKING Vis YFS	0.339075	0.25308	0.0931523	0.374223	0.330939	581882	581880	577212	421045	0.3161	0.3136	0.3286	0.333	0.0003	-0.0064	0.0014	0.011	0.001	0.0012	0.0001	0.0033	0.7939	1.433e-07	6.273e-22	0.0007549	DNER(nearest), PID1(PoPs)
DNER	rs62193248	FALSE			2_230596917_A_T	2	230596917	FVC		A	T	0.682	0.318	7.065	1.61e-12	+++++---++?+++++++--++++++-++-+-++-++-+-+++++++++-	ALHS ALSPAC ARIC_AA ARIC_EA B58C BHS CHSAA CHSEA CKB EPIC EXCEED FHS FinnTwin GS20K H2000 HCHS hunt KORA_F4 KORA_S3 Korcula LBC1936 MESA_AFA_new MESA_CAU_new MESA_HIS_new NEO NFBC66 NFBC86 orcades PIVUS QBB Raine RS1 RS2 RS3 SAPALDIA_Edinburgh SAPALDIA_Gabriel SHIP-1 SHIP-TREND-0 SHIP-TREND-0_B2 Split Twins_UK UKB_AFR UKB_AMR UKB_EAS UKB_EUR UKB_SAS UKHLS VIKING Vis YFS	0.660909	0.952694	0.769188	0.574171	0.71413	581883	581881	577213	421045	0.68	0.6819	0.6689	0.6664	0.005	0.0074	-0.0003	0.0106	0.001	0.0012	0.0001	0.0033	3.557e-07	1.221e-10	0.05975	0.001182	DNER(nearest), SP110(rare_disease), TRIP12(PoPs)
DIS3L2	rs759018650	TRUE	rs3103293	33766948	2_233036849_G_GTC	2	233036849	FEV1	FEV1,FVC	G	GTC	0.172	0.172	-6.411	1.44e-10	??+?????-?????+--????-?-?????+???????????-+---????	ALHS ALSPAC ARIC_AA ARIC_EA B58C BHS CHSAA CHSEA CKB EPIC EXCEED FHS FinnTwin GS20K H2000 HCHS hunt KORA_F4 KORA_S3 Korcula LBC1936 MESA_AFA_new MESA_CAU_new MESA_HIS_new NEO NFBC66 NFBC86 orcades PIVUS QBB Raine RS1 RS2 RS3 SAPALDIA_Edinburgh SAPALDIA_Gabriel SHIP-1 SHIP-TREND-0 SHIP-TREND-0_B2 Split Twins_UK UKB_AFR UKB_AMR UKB_EAS UKB_EUR UKB_SAS UKHLS VIKING Vis YFS	0.148573	0.0290091	0.299886	0.215199	0.369614	464518	464518	464518	365467	0.1941	0.1986	0.1674	0.1538	-0.0088	-0.0097	-0.0004	-0.0215	0.0014	0.0016	0.0002	0.0049	1.083e-10	6.192e-10	0.03864	9.979e-06	DIS3L2(PoPs,nearest)
AGAP1	rs35814183	FALSE			2_236568277_G_T	2	236568277	FVC		T	G	0.187	0.187	6.345	2.22e-10	-+++++-++-?-+++++++++++-+--++?-+-+------++-+++++--	ALHS ALSPAC ARIC_AA ARIC_EA B58C BHS CHSAA CHSEA CKB EPIC EXCEED FHS FinnTwin GS20K H2000 HCHS hunt KORA_F4 KORA_S3 Korcula LBC1936 MESA_AFA_new MESA_CAU_new MESA_HIS_new NEO NFBC66 NFBC86 orcades PIVUS QBB Raine RS1 RS2 RS3 SAPALDIA_Edinburgh SAPALDIA_Gabriel SHIP-1 SHIP-TREND-0 SHIP-TREND-0_B2 Split Twins_UK UKB_AFR UKB_AMR UKB_EAS UKB_EUR UKB_SAS UKHLS VIKING Vis YFS	0.161676	0.0195633	0.321804	0.205574	0.0899472	570338	570336	564334	421045	0.2089	0.214	0.1808	0.1653	0.0046	0.0078	-0.0003	0.0024	0.0012	0.0014	0.0002	0.0042	0.0001051	7.882e-09	0.06733	0.558	AGAP1(PoPs,nearest)
COL6A3	rs11677932	FALSE			2_238223955_A_G	2	238223955	FEV1/FVC		A	G	0.32	0.32	8.184	2.75e-16	++-+++--+++++++++-++-+--+-+-++-++++-+-++-+++++++	ALHS ALSPAC ARIC_AA ARIC_EA B58C BHS CHSAA CHSEA CKB EPIC FHS FinnTwin GS20K H2000 HCHS hunt KORA_F4 KORA_S3 Korcula LBC1936 MESA_AFA_new MESA_CAU_new MESA_HIS_new NEO NFBC66 NFBC86 orcades PIVUS Raine RS1 RS2 RS3 SAPALDIA_Edinburgh SAPALDIA_Gabriel SHIP-1 SHIP-TREND-0 SHIP-TREND-0_B2 Split Twins_UK UKB_AFR UKB_AMR UKB_EAS UKB_EUR UKB_SAS UKHLS VIKING Vis YFS	0.319622	0.166853	0.323845	0.335059	0.262931	581889	581887	575885	421045	0.3233	0.3236	0.3201	0.3148	0.0031	-0.0012	0.0011	0.0055	0.001	0.0011	0.0001	0.0033	0.001458	0.3003	7.934e-16	0.09465	COL6A3(PoPs,nearest)
LINC01107	rs58568091	TRUE	rs61332075	28166213	2_239430582_A_G	2	239430582	FEV1	FEV1,FF	A	G	0.12	0.12	8.827	1.07e-18	+++++-+++++++++++++++---++-+++-++-+---+-++++-+-++	ALHS ALSPAC ARIC_AA ARIC_EA B58C BHS CHSAA CHSEA CKB EPIC EXCEED FHS FinnTwin GS20K H2000 HCHS hunt KORA_F4 KORA_S3 Korcula LBC1936 MESA_AFA_new MESA_CAU_new MESA_HIS_new NEO NFBC66 NFBC86 orcades PIVUS Raine RS1 RS2 RS3 SAPALDIA_Edinburgh SAPALDIA_Gabriel SHIP-1 SHIP-TREND-0 SHIP-TREND-0_B2 Split Twins_UK UKB_AFR UKB_AMR UKB_EAS UKB_EUR UKB_SAS UKHLS VIKING Vis YFS	0.130753	0.0324974	0.0589351	0.0564395	0.0517257	581889	581887	575885	421045	0.1199	0.1193	0.1255	0.1262	0.0119	0.0081	0.0015	0.0207	0.0014	0.0017	0.0002	0.0046	1.328e-16	1.327e-06	1.453e-13	7.747e-06	ASB1(PoPs), LINC01107(nearest)
TWIST2	rs13410025	TRUE	rs6431620	30804560	2_239614258_A_C	2	239614258	FEV1	FEV1,FVC	A	C	0.225	0.225	-7.141	9.26e-13	----+-----+-+-------+++----+-+---++---+------++-+	ALHS ALSPAC ARIC_AA ARIC_EA B58C BHS CHSAA CHSEA CKB EPIC EXCEED FHS FinnTwin GS20K H2000 HCHS hunt KORA_F4 KORA_S3 Korcula LBC1936 MESA_AFA_new MESA_CAU_new MESA_HIS_new NEO NFBC66 NFBC86 orcades PIVUS Raine RS1 RS2 RS3 SAPALDIA_Edinburgh SAPALDIA_Gabriel SHIP-1 SHIP-TREND-0 SHIP-TREND-0_B2 Split Twins_UK UKB_AFR UKB_AMR UKB_EAS UKB_EUR UKB_SAS UKHLS VIKING Vis YFS	0.237001	0.258668	0.123803	0.303446	0.28589	581887	581885	575883	421045	0.2265	0.2252	0.2349	0.2353	-0.0088	-0.0082	-0.0008	-0.0155	0.0011	0.0013	0.0002	0.0036	1.507e-15	2.982e-10	8.906e-07	1.676e-05	TWIST2(PoPs,nearest)
FLJ43879	rs4591362	TRUE	rs12477314	21946350	2_239877738_A_G	2	239877738	FEV1/FVC	PEF,FEV1,FF	A	G	0.205	0.205	18.36	2.76e-75	++++++++++?+++++++++-++-++++-++-+++++-+---+++++++-	ALHS ALSPAC ARIC_AA ARIC_EA B58C BHS CHSAA CHSEA CKB EPIC EXCEED FHS FinnTwin GS20K H2000 HCHS hunt KORA_F4 KORA_S3 Korcula LBC1936 MESA_AFA_new MESA_CAU_new MESA_HIS_new NEO NFBC66 NFBC86 orcades PIVUS QBB Raine RS1 RS2 RS3 SAPALDIA_Edinburgh SAPALDIA_Gabriel SHIP-1 SHIP-TREND-0 SHIP-TREND-0_B2 Split Twins_UK UKB_AFR UKB_AMR UKB_EAS UKB_EUR UKB_SAS UKHLS VIKING Vis YFS	0.197481	0.0130274	0.24918	0.202868	0.113873	581889	581887	575885	421045	0.2124	0.2144	0.2022	0.1951	0.0114	0.0023	0.0029	0.025	0.0011	0.0013	0.0002	0.0039	2.522e-24	0.07376	9.834e-66	9.275e-11	FLJ43879(nearest), HDAC4(PoPs), TWIST2(mouse_KO)
AGXT	rs10933640	TRUE	rs6437219	30804560	2_241813782_A_G	2	241813782	FVC		A	G	0.467	0.467	6.478	9.33e-11	+++++++-++++++++-+-+++--+++---+--+++++-++++++++-	ALHS ALSPAC ARIC_AA ARIC_EA B58C BHS CHSAA CHSEA CKB EPIC FHS FinnTwin GS20K H2000 HCHS hunt KORA_F4 KORA_S3 Korcula LBC1936 MESA_AFA_new MESA_CAU_new MESA_HIS_new NEO NFBC66 NFBC86 orcades PIVUS Raine RS1 RS2 RS3 SAPALDIA_Edinburgh SAPALDIA_Gabriel SHIP-1 SHIP-TREND-0 SHIP-TREND-0_B2 Split Twins_UK UKB_AFR UKB_AMR UKB_EAS UKB_EUR UKB_SAS UKHLS VIKING Vis YFS	0.483708	0.608073	0.407086	0.384738	0.420394	581881	581879	575877	421045	0.4581	0.457	0.4719	0.4753	0.0043	0.007	-0.0004	0.0082	0.0009	0.0011	0.0001	0.0031	2.301e-06	8.884e-11	0.006815	0.007398	AGXT(eQTL,nearest), SNED1(eQTL,PoPs), AC104809.4(eQTL), C2orf54(eQTL)
HDLBP	rs7599888	FALSE			2_242248033_C_G	2	242248033	FEV1/FVC		C	G	0.447	0.447	7.128	1.02e-12	++?--+?-?++++-?+-+-+?+?+++-+------+++++???+?++--	ALHS ALSPAC ARIC_AA ARIC_EA B58C BHS CHSAA CHSEA CKB EPIC FHS FinnTwin GS20K H2000 HCHS hunt KORA_F4 KORA_S3 Korcula LBC1936 MESA_AFA_new MESA_CAU_new MESA_HIS_new NEO NFBC66 NFBC86 orcades PIVUS Raine RS1 RS2 RS3 SAPALDIA_Edinburgh SAPALDIA_Gabriel SHIP-1 SHIP-TREND-0 SHIP-TREND-0_B2 Split Twins_UK UKB_AFR UKB_AMR UKB_EAS UKB_EUR UKB_SAS UKHLS VIKING Vis YFS	0.444797	0.815091	0.21044	0.467671	0.364811	581889	581887	575885	421045	0.4205	0.4159	0.4387	0.4525	0.0023	-0.0003	0.0008	0.0044	0.0009	0.0011	0.0001	0.0031	0.01339	0.789	1.33e-09	0.1572	SNED1(eQTL,PoPs), AC104809.4(eQTL), AGXT(eQTL), C2orf54(eQTL), HDLBP(nearest), PPP1R7(eQTL)
BOK	rs876531	TRUE	rs6733504	30804560	2_242500662_C_T	2	242500662	FVC	FEV1,FVC	T	C	0.44	0.44	-9.446	3.53e-21	------+---?-------++++-+---+--+--------++------+++	ALHS ALSPAC ARIC_AA ARIC_EA B58C BHS CHSAA CHSEA CKB EPIC EXCEED FHS FinnTwin GS20K H2000 HCHS hunt KORA_F4 KORA_S3 Korcula LBC1936 MESA_AFA_new MESA_CAU_new MESA_HIS_new NEO NFBC66 NFBC86 orcades PIVUS QBB Raine RS1 RS2 RS3 SAPALDIA_Edinburgh SAPALDIA_Gabriel SHIP-1 SHIP-TREND-0 SHIP-TREND-0_B2 Split Twins_UK UKB_AFR UKB_AMR UKB_EAS UKB_EUR UKB_SAS UKHLS VIKING Vis YFS	0.455083	0.678296	0.334506	0.522216	0.516071	581867	581865	575863	421045	0.4395	0.4361	0.4532	0.4555	-0.0072	-0.0099	0.0002	-0.0089	0.0009	0.0011	0.0001	0.0031	1.742e-14	1.276e-19	0.2518	0.003763	BOK(eQTL,nearest), HDLBP(PoPs)
LMCD1	rs7629532	FALSE			3_8584999_C_G	3	8584999	FEV1/FVC	FVC,FF	C	G	0.467	0.467	-7.723	1.14e-14	+---+-+-----+--+--+-++----++-?-+------+-++-------+	ALHS ALSPAC ARIC_AA ARIC_EA B58C BHS CHSAA CHSEA CKB EPIC EXCEED FHS FinnTwin GS20K H2000 HCHS hunt KORA_F4 KORA_S3 Korcula LBC1936 MESA_AFA_new MESA_CAU_new MESA_HIS_new NEO NFBC66 NFBC86 orcades PIVUS QBB Raine RS1 RS2 RS3 SAPALDIA_Edinburgh SAPALDIA_Gabriel SHIP-1 SHIP-TREND-0 SHIP-TREND-0_B2 Split Twins_UK UKB_AFR UKB_AMR UKB_EAS UKB_EUR UKB_SAS UKHLS VIKING Vis YFS	0.540753	0.509196	0.0953011	0.500825	0.387629	570341	570339	565671	421045	0.4987	0.4949	0.5215	0.5272	0.0009	0.0054	-0.0009	-0.015	0.001	0.0011	0.0001	0.0031	0.3655	2.459e-06	8.401e-12	1.004e-06	LMCD1(PoPs,nearest), LMCD1-AS1(eQTL)
RAD18	rs7616874	FALSE			3_8909526_A_G	3	8909526	FVC		A	G	0.661	0.339	6.793	1.1e-11	++-+++-+++-++++-++-+-+++++-++-++--+--++++++++-+-+-	ALHS ALSPAC ARIC_AA ARIC_EA B58C BHS CHSAA CHSEA CKB EPIC EXCEED FHS FinnTwin GS20K H2000 HCHS hunt KORA_F4 KORA_S3 Korcula LBC1936 MESA_AFA_new MESA_CAU_new MESA_HIS_new NEO NFBC66 NFBC86 orcades PIVUS QBB Raine RS1 RS2 RS3 SAPALDIA_Edinburgh SAPALDIA_Gabriel SHIP-1 SHIP-TREND-0 SHIP-TREND-0_B2 Split Twins_UK UKB_AFR UKB_AMR UKB_EAS UKB_EUR UKB_SAS UKHLS VIKING Vis YFS	0.680575	0.449137	0.537084	0.709078	0.758899	581889	581887	577219	421045	0.6533	0.6518	0.6671	0.6787	0.0051	0.0074	-0.0002	0.0068	0.001	0.0011	0.0001	0.0033	8.16e-08	3.309e-11	0.1435	0.03874	RAD18(PoPs,nearest), OXTR(eQTL)
VGLL4	rs2442777	TRUE	rs2442776	30804561	3_11652331_A_G	3	11652331	FEV1/FVC	FEV1,FF	A	G	0.667	0.333	10.399	2.5e-25	++++-+-++++++++++-+-+---++++++-++++++---++++++-+-+	ALHS ALSPAC ARIC_AA ARIC_EA B58C BHS CHSAA CHSEA CKB EPIC EXCEED FHS FinnTwin GS20K H2000 HCHS hunt KORA_F4 KORA_S3 Korcula LBC1936 MESA_AFA_new MESA_CAU_new MESA_HIS_new NEO NFBC66 NFBC86 orcades PIVUS QBB Raine RS1 RS2 RS3 SAPALDIA_Edinburgh SAPALDIA_Gabriel SHIP-1 SHIP-TREND-0 SHIP-TREND-0_B2 Split Twins_UK UKB_AFR UKB_AMR UKB_EAS UKB_EUR UKB_SAS UKHLS VIKING Vis YFS	0.734267	0.26564	0.395994	0.648902	0.377156	581889	581887	577219	421045	0.6372	0.634	0.6819	0.7062	0.0074	0.0032	0.0015	0.0124	0.001	0.0012	0.0001	0.0034	6.672e-14	0.00506	5.126e-24	0.0003193	VGLL4(eQTL,PoPs,nearest)
MKRN2	rs713178	FALSE			3_12615984_C_T	3	12615984	FEV1		T	C	0.779	0.221	6.051	1.44e-09	+++++++++++++++-+++-+-+-++++-+++-+++++--+-++++-++	ALHS ALSPAC ARIC_AA ARIC_EA B58C BHS CHSAA CHSEA CKB EPIC EXCEED FHS FinnTwin GS20K H2000 HCHS hunt KORA_F4 KORA_S3 Korcula LBC1936 MESA_AFA_new MESA_CAU_new MESA_HIS_new NEO NFBC66 NFBC86 orcades PIVUS Raine RS1 RS2 RS3 SAPALDIA_Edinburgh SAPALDIA_Gabriel SHIP-1 SHIP-TREND-0 SHIP-TREND-0_B2 Split Twins_UK UKB_AFR UKB_AMR UKB_EAS UKB_EUR UKB_SAS UKHLS VIKING Vis YFS	0.754959	0.83771	0.934143	0.778413	0.862412	581889	581887	577219	421045	0.7678	0.769	0.7601	0.7565	0.0069	0.0048	0.0009	0.0136	0.0011	0.0013	0.0002	0.0035	1.087e-09	0.0002793	2.979e-08	0.0001115	RAF1(eQTL,PoPs), MKRN2(nearest)
LINC00620	rs2974389	TRUE	rs2974389	30804560	3_13787641_A_G	3	13787641	FEV1	FEV1,FVC	A	G	0.435	0.435	6.973	3.1e-12	++-+++-++++-+++++++-+----+++-+--+++++--++++++++++	ALHS ALSPAC ARIC_AA ARIC_EA B58C BHS CHSAA CHSEA CKB EPIC EXCEED FHS FinnTwin GS20K H2000 HCHS hunt KORA_F4 KORA_S3 Korcula LBC1936 MESA_AFA_new MESA_CAU_new MESA_HIS_new NEO NFBC66 NFBC86 orcades PIVUS Raine RS1 RS2 RS3 SAPALDIA_Edinburgh SAPALDIA_Gabriel SHIP-1 SHIP-TREND-0 SHIP-TREND-0_B2 Split Twins_UK UKB_AFR UKB_AMR UKB_EAS UKB_EUR UKB_SAS UKHLS VIKING Vis YFS	0.424118	0.521405	0.474693	0.509576	0.34214	581884	581882	577214	421045	0.442	0.4432	0.4349	0.4346	0.0058	0.0062	0.0002	0.014	0.0009	0.0011	0.0001	0.0031	2.419e-10	5.873e-09	0.07411	5.493e-06	HDAC11(PoPs), LINC00620(nearest), WNT7A(eQTL)
WNT7A	rs73151668	FALSE			3_13920594_G_T	3	13920594	FEV1/FVC		T	G	0.14	0.14	8.292	1.12e-16	++++++-+-+++++++++-+++++++---+--++++++-+++-+++++-	ALHS ALSPAC ARIC_AA ARIC_EA B58C BHS CHSAA CHSEA CKB EPIC EXCEED FHS FinnTwin GS20K H2000 HCHS hunt KORA_F4 KORA_S3 Korcula LBC1936 MESA_AFA_new MESA_CAU_new MESA_HIS_new NEO NFBC66 NFBC86 orcades PIVUS Raine RS1 RS2 RS3 SAPALDIA_Edinburgh SAPALDIA_Gabriel SHIP-1 SHIP-TREND-0 SHIP-TREND-0_B2 Split Twins_UK UKB_AFR UKB_AMR UKB_EAS UKB_EUR UKB_SAS UKHLS VIKING Vis YFS	0.153353	0.139717	0.0564816	0.189935	0.0600937	570328	570326	565658	421045	0.1454	0.1447	0.1505	0.1506	-0.0007	-0.008	0.0016	0.0091	0.0014	0.0016	0.0002	0.0043	0.5984	5.383e-07	3.348e-17	0.03196	FBLN2(PoPs), WNT7A(nearest)
RARB	rs1529672	TRUE	rs1529672	21946350	3_25520582_A_C	3	25520582	FEV1/FVC	PEF,FEV1,FF	A	C	0.199	0.199	14.928	2.16e-50	++++++++++++-++++++--++-+++-++-++++++-++++++++++-+	ALHS ALSPAC ARIC_AA ARIC_EA B58C BHS CHSAA CHSEA CKB EPIC EXCEED FHS FinnTwin GS20K H2000 HCHS hunt KORA_F4 KORA_S3 Korcula LBC1936 MESA_AFA_new MESA_CAU_new MESA_HIS_new NEO NFBC66 NFBC86 orcades PIVUS QBB Raine RS1 RS2 RS3 SAPALDIA_Edinburgh SAPALDIA_Gabriel SHIP-1 SHIP-TREND-0 SHIP-TREND-0_B2 Split Twins_UK UKB_AFR UKB_AMR UKB_EAS UKB_EUR UKB_SAS UKHLS VIKING Vis YFS	0.173454	0.20855	0.352866	0.127199	0.137649	581889	581887	577219	421045	0.2188	0.2243	0.1903	0.1746	0.0078	0	0.0025	0.0246	0.0011	0.0013	0.0002	0.004	1.464e-11	0.9734	3.139e-47	1.029e-09	RARB(PoPs,nearest), TOP2B(rare_disease)
TOP2B	rs11372851	FALSE			3_25639973_A_AT	3	25639973	FEV1/FVC		A	AT	0.637	0.363	-6.735	1.64e-11	??-?????-?????-?????????????????????????-+---????	ALHS ALSPAC ARIC_AA ARIC_EA B58C BHS CHSAA CHSEA CKB EPIC EXCEED FHS FinnTwin GS20K H2000 HCHS hunt KORA_F4 KORA_S3 Korcula LBC1936 MESA_AFA_new MESA_CAU_new MESA_HIS_new NEO NFBC66 NFBC86 orcades PIVUS Raine RS1 RS2 RS3 SAPALDIA_Edinburgh SAPALDIA_Gabriel SHIP-1 SHIP-TREND-0 SHIP-TREND-0_B2 Split Twins_UK UKB_AFR UKB_AMR UKB_EAS UKB_EUR UKB_SAS UKHLS VIKING Vis YFS	0.630512	0.460361	0.660638	0.658406	0.611057	435386	435386	435386	336335	0.6421	0.6427	0.6315	0.6277	-0.0045	-0.0009	-0.0013	-0.0207	0.0011	0.0013	0.0002	0.0037	4.615e-05	0.4968	2.327e-16	2.486e-08	TOP2B(eQTL,rare_disease,nearest), RARB(eQTL,PoPs)
TOP2B	rs60962207	FALSE			3_25705003_A_G	3	25705003	FEV1		A	G	0.175	0.175	6.355	2.08e-10	++-+++++++++++-++++++++-++-+--++++++-+--+++++--++	ALHS ALSPAC ARIC_AA ARIC_EA B58C BHS CHSAA CHSEA CKB EPIC EXCEED FHS FinnTwin GS20K H2000 HCHS hunt KORA_F4 KORA_S3 Korcula LBC1936 MESA_AFA_new MESA_CAU_new MESA_HIS_new NEO NFBC66 NFBC86 orcades PIVUS Raine RS1 RS2 RS3 SAPALDIA_Edinburgh SAPALDIA_Gabriel SHIP-1 SHIP-TREND-0 SHIP-TREND-0_B2 Split Twins_UK UKB_AFR UKB_AMR UKB_EAS UKB_EUR UKB_SAS UKHLS VIKING Vis YFS	0.17442	0.0303404	0.195964	0.136606	0.188423	581888	581886	577218	421045	0.1779	0.1785	0.1755	0.1719	0.0074	0.0054	0.001	0.0231	0.0012	0.0014	0.0002	0.004	4.908e-10	9.658e-05	1.165e-08	1.11e-08	TOP2B(rare_disease,nearest), RARB(PoPs)
RBMS3	rs17666332	TRUE	rs17666332	30061609	3_29469675_G_T	3	29469675	FEV1/FVC		T	G	0.749	0.251	11.404	4e-30	+++++++++++++++++++++-+-+-+++-+++-++++++--++++++-+	ALHS ALSPAC ARIC_AA ARIC_EA B58C BHS CHSAA CHSEA CKB EPIC EXCEED FHS FinnTwin GS20K H2000 HCHS hunt KORA_F4 KORA_S3 Korcula LBC1936 MESA_AFA_new MESA_CAU_new MESA_HIS_new NEO NFBC66 NFBC86 orcades PIVUS QBB Raine RS1 RS2 RS3 SAPALDIA_Edinburgh SAPALDIA_Gabriel SHIP-1 SHIP-TREND-0 SHIP-TREND-0_B2 Split Twins_UK UKB_AFR UKB_AMR UKB_EAS UKB_EUR UKB_SAS UKHLS VIKING Vis YFS	0.720435	0.962846	0.820553	0.661215	0.74498	581889	581887	577219	421045	0.7434	0.7446	0.7308	0.7263	0.0045	-0.0018	0.0018	0.0088	0.0011	0.0013	0.0002	0.0034	2.702e-05	0.1523	1.612e-31	0.011	RBMS3(PoPs,nearest)
TRIM71	rs4909017	FALSE			3_32937596_C_T	3	32937596	FEV1	PEF,FEV1,FVC	T	C	0.588	0.412	9.858	6.31e-23	++++++++++++-+++++---+-+++++++--+++++++-+-+++-+-+-	ALHS ALSPAC ARIC_AA ARIC_EA B58C BHS CHSAA CHSEA CKB EPIC EXCEED FHS FinnTwin GS20K H2000 HCHS hunt KORA_F4 KORA_S3 Korcula LBC1936 MESA_AFA_new MESA_CAU_new MESA_HIS_new NEO NFBC66 NFBC86 orcades PIVUS QBB Raine RS1 RS2 RS3 SAPALDIA_Edinburgh SAPALDIA_Gabriel SHIP-1 SHIP-TREND-0 SHIP-TREND-0_B2 Split Twins_UK UKB_AFR UKB_AMR UKB_EAS UKB_EUR UKB_SAS UKHLS VIKING Vis YFS	0.556398	0.464632	0.782289	0.618299	0.673653	581874	581872	577204	421045	0.5866	0.5913	0.5687	0.5529	0.0085	0.0093	0.0003	0.019	0.0009	0.0011	0.0001	0.0031	9.092e-20	1.822e-17	0.01566	7.141e-10	CNOT10(PoPs), DYNC1LI1(mouse_KO), TRIM71(nearest)
SUSD5	rs6810039	FALSE			3_33194990_A_C	3	33194990	FVC	FEV1,FVC	A	C	0.466	0.466	-7.089	1.35e-12	+-----+---+-+----+-+------+-++-+------+--+---+--	ALHS ALSPAC ARIC_AA ARIC_EA B58C BHS CHSAA CHSEA CKB EPIC EXCEED FHS FinnTwin GS20K H2000 HCHS hunt KORA_F4 KORA_S3 Korcula LBC1936 MESA_AFA_new MESA_CAU_new MESA_HIS_new NEO NFBC66 NFBC86 orcades PIVUS Raine RS1 RS2 RS3 SAPALDIA_Edinburgh SAPALDIA_Gabriel SHIP-1 SHIP-TREND-0 SHIP-TREND-0_B2 Split Twins_UK UKB_AFR UKB_EAS UKB_EUR UKB_SAS UKHLS VIKING Vis YFS	0.400551	0.728176	0.854859	0.35847	0.594262	581889	581887	577219	421045	0.4569	0.461	0.427	0.4068	-0.0049	-0.0064	0	-0.0125	0.001	0.0011	0.0001	0.0031	4.52e-07	2.829e-08	0.9209	6.082e-05	SUSD5(credible,nearest), UBP1(PoPs)
SUSD5	rs10222597	FALSE			3_33264914_C_T	3	33264914	FVC	FEV1,FVC	T	C	0.119	0.119	7.877	3.36e-15	+++++--+++-+-+-++-+--+-+++++-+-++++++--++?++-+-++	ALHS ALSPAC ARIC_AA ARIC_EA B58C BHS CHSAA CHSEA CKB EPIC EXCEED FHS FinnTwin GS20K H2000 HCHS hunt KORA_F4 KORA_S3 Korcula LBC1936 MESA_AFA_new MESA_CAU_new MESA_HIS_new NEO NFBC66 NFBC86 orcades PIVUS Raine RS1 RS2 RS3 SAPALDIA_Edinburgh SAPALDIA_Gabriel SHIP-1 SHIP-TREND-0 SHIP-TREND-0_B2 Split Twins_UK UKB_AFR UKB_AMR UKB_EAS UKB_EUR UKB_SAS UKHLS VIKING Vis YFS	0.0850685	0.0717544	0.34843	0.0863201	0.21364	570343	570341	565673	421045	0.1934	0.1971	0.1473	0.1007	0.0097	0.0131	-0.0004	0.0053	0.0014	0.0016	0.0002	0.0053	1.297e-12	1.49e-16	0.06066	0.3242	SUSD5(nearest), UBP1(PoPs)
XYLB	rs9311188	FALSE			3_38462379_A_G	3	38462379	FVC		A	G	0.331	0.331	-5.908	3.46e-09	------+-----+--+----+----+-+-?++++----+---++-----+	ALHS ALSPAC ARIC_AA ARIC_EA B58C BHS CHSAA CHSEA CKB EPIC EXCEED FHS FinnTwin GS20K H2000 HCHS hunt KORA_F4 KORA_S3 Korcula LBC1936 MESA_AFA_new MESA_CAU_new MESA_HIS_new NEO NFBC66 NFBC86 orcades PIVUS QBB Raine RS1 RS2 RS3 SAPALDIA_Edinburgh SAPALDIA_Gabriel SHIP-1 SHIP-TREND-0 SHIP-TREND-0_B2 Split Twins_UK UKB_AFR UKB_AMR UKB_EAS UKB_EUR UKB_SAS UKHLS VIKING Vis YFS	0.328484	0.103319	0.366758	0.323405	0.321229	570340	570338	565670	421045	0.3355	0.336	0.3307	0.3316	-0.0052	-0.0063	0	-0.0125	0.001	0.0011	0.0001	0.0033	9.727e-08	2.216e-08	0.8797	0.0001322	ACVR2B(PoPs), ACVR2B-AS1(eQTL), MYD88(rare_disease), XYLB(nearest)
ANO10	rs9845142	FALSE			3_43479658_G_T	3	43479658	FEV1		T	G	0.608	0.392	5.89	3.86e-09	-++++-+++++++++++-+--+---+++++++--++-+--+++++-+-++	ALHS ALSPAC ARIC_AA ARIC_EA B58C BHS CHSAA CHSEA CKB EPIC EXCEED FHS FinnTwin GS20K H2000 HCHS hunt KORA_F4 KORA_S3 Korcula LBC1936 MESA_AFA_new MESA_CAU_new MESA_HIS_new NEO NFBC66 NFBC86 orcades PIVUS QBB Raine RS1 RS2 RS3 SAPALDIA_Edinburgh SAPALDIA_Gabriel SHIP-1 SHIP-TREND-0 SHIP-TREND-0_B2 Split Twins_UK UKB_AFR UKB_AMR UKB_EAS UKB_EUR UKB_SAS UKHLS VIKING Vis YFS	0.57468	0.36921	0.822905	0.499404	0.650191	581886	581884	577216	421045	0.6014	0.6053	0.5818	0.5678	0.0053	0.0055	0.0002	0.0127	0.001	0.0011	0.0001	0.0031	3.141e-08	8.415e-07	0.07058	4.112e-05	ABHD5(eQTL), ANO10(nearest), SNRK(PoPs)
TRAIP	rs695238	FALSE			3_49869158_A_C	3	49869158	FEV1	PEF,FEV1,FVC	A	C	0.553	0.447	7.534	4.91e-14	++++-++++++-+-++++++-++++++-++--+++++++-+++++++++-	ALHS ALSPAC ARIC_AA ARIC_EA B58C BHS CHSAA CHSEA CKB EPIC EXCEED FHS FinnTwin GS20K H2000 HCHS hunt KORA_F4 KORA_S3 Korcula LBC1936 MESA_AFA_new MESA_CAU_new MESA_HIS_new NEO NFBC66 NFBC86 orcades PIVUS QBB Raine RS1 RS2 RS3 SAPALDIA_Edinburgh SAPALDIA_Gabriel SHIP-1 SHIP-TREND-0 SHIP-TREND-0_B2 Split Twins_UK UKB_AFR UKB_AMR UKB_EAS UKB_EUR UKB_SAS UKHLS VIKING Vis YFS	0.498187	0.40608	0.819054	0.5906	0.612178	581889	581887	577219	421045	0.5461	0.5503	0.5192	0.5081	0.0071	0.0069	0.0005	0.0187	0.0009	0.0011	0.0001	0.0031	5.241e-14	4.028e-10	8.351e-05	9.803e-10	RBM6(eQTL,PoPs), AMT(eQTL), GMPPB(eQTL), HYAL3(eQTL), IMPDH2(eQTL), RNF123(eQTL), TDGF1(pQTL), TRAIP(nearest)
PBRM1	rs140435693	FALSE			3_52608972_A_G	3	52608972	FEV1		A	G	0.948	0.052	-7.267	3.68e-13	-+?-+-?-?-------+++--?+-------++--+--+--?-?-+-++-	ALHS ALSPAC ARIC_AA ARIC_EA B58C BHS CHSAA CHSEA CKB EPIC EXCEED FHS FinnTwin GS20K H2000 HCHS hunt KORA_F4 KORA_S3 Korcula LBC1936 MESA_AFA_new MESA_CAU_new MESA_HIS_new NEO NFBC66 NFBC86 orcades PIVUS Raine RS1 RS2 RS3 SAPALDIA_Edinburgh SAPALDIA_Gabriel SHIP-1 SHIP-TREND-0 SHIP-TREND-0_B2 Split Twins_UK UKB_AFR UKB_AMR UKB_EAS UKB_EUR UKB_SAS UKHLS VIKING Vis YFS	0.946747	0.995301	0.999912	0.940061	0.98814	495690	495688	491020	418573	0.9479	0.9481	0.9478	0.9483	-0.0144	-0.0149	-0.0008	-0.0319	0.0023	0.0027	0.0003	0.007	4.39e-10	5.089e-08	0.01537	5.273e-06	DNAH1(eQTL,WES,WES,WES,WES,rare_disease), BAP1(WES,WES,WES,WES), ITIH1(WES,WES,WES,WES), STAB1(WES,WES,WES,WES), ALAS1(eQTL), GLYCTK(eQTL), ITIH4(eQTL), NEK4(eQTL), NISCH(PoPs), NT5DC2(eQTL), PBRM1(nearest), PPM1M(eQTL), RFT1(eQTL)
CACNA1D	rs3774524	FALSE			3_53702395_A_G	3	53702395	FEV1		A	G	0.808	0.192	7.689	1.49e-14	+-++++-+++-+-++++--+-+-+---+-+-++--+--++++-+++-+++	ALHS ALSPAC ARIC_AA ARIC_EA B58C BHS CHSAA CHSEA CKB EPIC EXCEED FHS FinnTwin GS20K H2000 HCHS hunt KORA_F4 KORA_S3 Korcula LBC1936 MESA_AFA_new MESA_CAU_new MESA_HIS_new NEO NFBC66 NFBC86 orcades PIVUS QBB Raine RS1 RS2 RS3 SAPALDIA_Edinburgh SAPALDIA_Gabriel SHIP-1 SHIP-TREND-0 SHIP-TREND-0_B2 Split Twins_UK UKB_AFR UKB_AMR UKB_EAS UKB_EUR UKB_SAS UKHLS VIKING Vis YFS	0.796296	0.556723	0.914921	0.802922	0.855379	581889	581887	577219	421045	0.8022	0.804	0.7954	0.7946	0.0088	0.0059	0.0014	0.0185	0.0012	0.0014	0.0002	0.0038	4.334e-14	1.401e-05	3.014e-16	9.979e-07	CACNA1D(eQTL,PoPs,nearest), PRKCD(rare_disease)
CACNA1D	rs11711142	FALSE			3_53712091_A_G	3	53712091	FEV1/FVC		A	G	0.727	0.273	9.746	1.93e-22	++++-+-+++-++-+-++-+-++--++++-++++++-++++--+-++++	ALHS ALSPAC ARIC_AA ARIC_EA B58C BHS CHSAA CHSEA CKB EPIC EXCEED FHS FinnTwin GS20K H2000 HCHS hunt KORA_F4 KORA_S3 Korcula LBC1936 MESA_AFA_new MESA_CAU_new MESA_HIS_new NEO NFBC66 NFBC86 orcades PIVUS Raine RS1 RS2 RS3 SAPALDIA_Edinburgh SAPALDIA_Gabriel SHIP-1 SHIP-TREND-0 SHIP-TREND-0_B2 Split Twins_UK UKB_AFR UKB_AMR UKB_EAS UKB_EUR UKB_SAS UKHLS VIKING Vis YFS	0.729023	0.694715	0.707403	0.719061	0.776663	581888	581886	577218	421045	0.726	0.7259	0.7271	0.7309	0.0072	0.0031	0.0014	0.0166	0.001	0.0012	0.0001	0.0034	1.809e-12	0.008892	5.793e-22	1.273e-06	CACNA1D(PoPs,nearest), PRKCD(rare_disease)
CACNA2D3	rs934083	FALSE			3_54790379_C_T	3	54790379	FVC		T	C	0.475	0.475	6.264	3.76e-10	-++++--++++--+++-----+++++++++-+++-+-+-++-++++-++	ALHS ALSPAC ARIC_AA ARIC_EA B58C BHS CHSAA CHSEA CKB EPIC EXCEED FHS FinnTwin GS20K H2000 HCHS hunt KORA_F4 KORA_S3 Korcula LBC1936 MESA_AFA_new MESA_CAU_new MESA_HIS_new NEO NFBC66 NFBC86 orcades PIVUS Raine RS1 RS2 RS3 SAPALDIA_Edinburgh SAPALDIA_Gabriel SHIP-1 SHIP-TREND-0 SHIP-TREND-0_B2 Split Twins_UK UKB_AFR UKB_AMR UKB_EAS UKB_EUR UKB_SAS UKHLS VIKING Vis YFS	0.475816	0.195989	0.485309	0.494577	0.424054	581889	581887	577219	421045	0.4763	0.4768	0.4738	0.4674	0.0058	0.0071	0	0.0084	0.0009	0.0011	0.0001	0.0031	1.23e-10	2.032e-11	0.8971	0.006358	CACNA2D3(nearest), ESRG(eQTL), LRTM1(PoPs)
CACNA2D3	rs1380119	TRUE	rs1458979	28166213	3_55153214_A_G	3	55153214	FEV1/FVC	PEF,FEV1,FF	A	G	0.244	0.244	-11.111	1.11e-28	+---+--+----+----+-++-++-++-+-+---+--+-----+-+-+-+	ALHS ALSPAC ARIC_AA ARIC_EA B58C BHS CHSAA CHSEA CKB EPIC EXCEED FHS FinnTwin GS20K H2000 HCHS hunt KORA_F4 KORA_S3 Korcula LBC1936 MESA_AFA_new MESA_CAU_new MESA_HIS_new NEO NFBC66 NFBC86 orcades PIVUS QBB Raine RS1 RS2 RS3 SAPALDIA_Edinburgh SAPALDIA_Gabriel SHIP-1 SHIP-TREND-0 SHIP-TREND-0_B2 Split Twins_UK UKB_AFR UKB_AMR UKB_EAS UKB_EUR UKB_SAS UKHLS VIKING Vis YFS	0.279836	0.123258	0.0889361	0.297142	0.164615	581889	581887	577219	421045	0.2587	0.2573	0.269	0.2726	-0.0089	-0.0042	-0.0017	-0.0255	0.0011	0.0013	0.0002	0.0034	3.903e-16	0.001148	6.735e-29	1.366e-13	CACNA2D3(PoPs,nearest)
ERC2	rs2132237	FALSE			3_55782769_A_G	3	55782769	FEV1/FVC		A	G	0.576	0.424	6.084	1.17e-09	++-+++++++++	ARIC_AA CKB H2000 HCHS hunt MESA_AFA_new MESA_HIS_new UKB_AFR UKB_AMR UKB_EAS UKB_EUR UKB_SAS	0.586262	0.463752	0.568342	0.539827	0.685316	581889	581887	577219	421045	0.57	0.5694	0.5754	0.5738	-0.0002	-0.0038	0.0008	-0.0079	0.0009	0.0011	0.0001	0.0031	0.8102	0.000437	6.391e-10	0.01114	ERC2(PoPs,nearest), WNT5A(eQTL)
ERC2	rs7641482	FALSE			3_56235404_G_T	3	56235404	FEV1/FVC		T	G	0.77	0.23	-7.479	7.5e-14	??-?????-?????---????+?-????????????????--+--????	ALHS ALSPAC ARIC_AA ARIC_EA B58C BHS CHSAA CHSEA CKB EPIC EXCEED FHS FinnTwin GS20K H2000 HCHS hunt KORA_F4 KORA_S3 Korcula LBC1936 MESA_AFA_new MESA_CAU_new MESA_HIS_new NEO NFBC66 NFBC86 orcades PIVUS Raine RS1 RS2 RS3 SAPALDIA_Edinburgh SAPALDIA_Gabriel SHIP-1 SHIP-TREND-0 SHIP-TREND-0_B2 Split Twins_UK UKB_AFR UKB_AMR UKB_EAS UKB_EUR UKB_SAS UKHLS VIKING Vis YFS	0.821491	0.754181	0.496658	0.779834	0.525505	464518	464518	464518	365467	0.6996	0.6886	0.7694	0.8094	0.001	0.0059	-0.0012	-0.0154	0.0012	0.0014	0.0002	0.0045	0.4271	3.359e-05	1.564e-10	0.0005905	ERC2(nearest), FAM208A(PoPs)
SLMAP	rs9872373	TRUE	rs79294353	30061609	3_57871655_C_T	3	57871655	FEV1	FEV1,FVC,FF	T	C	0.285	0.285	13.93	4.18e-44	++++++-+++++-+?++--+++++++++-?+++++-+-+++--+++++++	ALHS ALSPAC ARIC_AA ARIC_EA B58C BHS CHSAA CHSEA CKB EPIC EXCEED FHS FinnTwin GS20K H2000 HCHS hunt KORA_F4 KORA_S3 Korcula LBC1936 MESA_AFA_new MESA_CAU_new MESA_HIS_new NEO NFBC66 NFBC86 orcades PIVUS QBB Raine RS1 RS2 RS3 SAPALDIA_Edinburgh SAPALDIA_Gabriel SHIP-1 SHIP-TREND-0 SHIP-TREND-0_B2 Split Twins_UK UKB_AFR UKB_AMR UKB_EAS UKB_EUR UKB_SAS UKHLS VIKING Vis YFS	0.244469	0.378447	0.477514	0.357999	0.35369	566550	566548	561880	421045	0.3064	0.3088	0.2747	0.251	0.0139	0.0115	0.0016	0.0236	0.001	0.0012	0.0002	0.0035	1.075e-42	6.862e-22	7.811e-25	1.898e-11	SLMAP(eQTL,nearest), ARF4(eQTL), DENND6A(eQTL), FLNB(PoPs), PDE12(eQTL)
ADAMTS9	rs59110590	FALSE			3_64434481_A_G	3	64434481	PEF		A	G	0.566	0.434	-6.744	1.54e-11	------+++-+---+-----++	ALSPAC ARIC_AA B58C EPIC FinnTwin hunt LBC1936 orcades Raine RS1 RS2 RS3 SHIP-1 SHIP-TREND-0 SHIP-TREND-0_B2 Split UKB_AFR UKB_AMR UKB_EAS UKB_EUR UKB_SAS VIKING	0.558257	0.911792	0.839303	0.596481	0.60856	581881	581879	577211	421045	0.598	0.6013	0.5776	0.5698	-0.0048	-0.0067	-0.0001	-0.0207	0.001	0.0011	0.0001	0.0031	6.758e-07	4.124e-09	0.6619	2.819e-11	ADAMTS9(nearest), PRICKLE2(PoPs)
ADAMTS9-AS2	rs704433	FALSE			3_64857303_A_C	3	64857303	FEV1/FVC		A	C	0.238	0.238	-6.269	3.64e-10	+++--+-+---+++----+---------+----------+-----++---	ALHS ALSPAC ARIC_AA ARIC_EA B58C BHS CHSAA CHSEA CKB EPIC EXCEED FHS FinnTwin GS20K H2000 HCHS hunt KORA_F4 KORA_S3 Korcula LBC1936 MESA_AFA_new MESA_CAU_new MESA_HIS_new NEO NFBC66 NFBC86 orcades PIVUS QBB Raine RS1 RS2 RS3 SAPALDIA_Edinburgh SAPALDIA_Gabriel SHIP-1 SHIP-TREND-0 SHIP-TREND-0_B2 Split Twins_UK UKB_AFR UKB_AMR UKB_EAS UKB_EUR UKB_SAS UKHLS VIKING Vis YFS	0.179939	0.137336	0.586362	0.1856	0.313116	581883	581881	577213	421045	0.2856	0.2975	0.2282	0.1843	-0.0034	-0.0002	-0.001	-0.016	0.0011	0.0013	0.0002	0.004	0.002732	0.8884	2.967e-09	5.323e-05	ADAMTS9(PoPs), ADAMTS9-AS2(nearest)
SUCLG2	rs4856781	TRUE	rs1490265	28166213	3_67454224_C_G	3	67454224	FEV1	FEV1,FVC	C	G	0.696	0.304	9.226	2.8e-20	-+++++-+++-+++--+--+++++++-+-+----++-----++++++-++	ALHS ALSPAC ARIC_AA ARIC_EA B58C BHS CHSAA CHSEA CKB EPIC EXCEED FHS FinnTwin GS20K H2000 HCHS hunt KORA_F4 KORA_S3 Korcula LBC1936 MESA_AFA_new MESA_CAU_new MESA_HIS_new NEO NFBC66 NFBC86 orcades PIVUS QBB Raine RS1 RS2 RS3 SAPALDIA_Edinburgh SAPALDIA_Gabriel SHIP-1 SHIP-TREND-0 SHIP-TREND-0_B2 Split Twins_UK UKB_AFR UKB_AMR UKB_EAS UKB_EUR UKB_SAS UKHLS VIKING Vis YFS	0.706851	0.80275	0.628127	0.825827	0.67756	581888	581886	577218	421045	0.6896	0.6869	0.6988	0.7007	0.0083	0.0093	0.0003	0.0103	0.001	0.0011	0.0001	0.0034	3.723e-17	4.474e-16	0.02184	0.002128	SUCLG2(PoPs,nearest)
FOXP1	rs2687201	FALSE			3_70928930_A_C	3	70928930	FEV1/FVC		A	C	0.336	0.336	7.653	1.96e-14	++++-++++-+--++++++-+-+-++++-+--++-+-++++--+++---+	ALHS ALSPAC ARIC_AA ARIC_EA B58C BHS CHSAA CHSEA CKB EPIC EXCEED FHS FinnTwin GS20K H2000 HCHS hunt KORA_F4 KORA_S3 Korcula LBC1936 MESA_AFA_new MESA_CAU_new MESA_HIS_new NEO NFBC66 NFBC86 orcades PIVUS QBB Raine RS1 RS2 RS3 SAPALDIA_Edinburgh SAPALDIA_Gabriel SHIP-1 SHIP-TREND-0 SHIP-TREND-0_B2 Split Twins_UK UKB_AFR UKB_AMR UKB_EAS UKB_EUR UKB_SAS UKHLS VIKING Vis YFS	0.305717	0.745574	0.463837	0.303186	0.289519	581879	581877	577209	421045	0.346	0.3497	0.3263	0.3204	0.0014	-0.0026	0.001	0.0145	0.001	0.0011	0.0001	0.0033	0.1409	0.01939	4.572e-13	1.264e-05	FOXP1(PoPs,nearest)
FOXP1	rs62244884	TRUE	rs35480566	30804560	3_71583383_A_G	3	71583383	FVC	FEV1,FVC	A	G	0.357	0.357	9.899	4.19e-23	+++++++-+++++++++-++--+++++-+++++-+++-++-++-++++-+	ALHS ALSPAC ARIC_AA ARIC_EA B58C BHS CHSAA CHSEA CKB EPIC EXCEED FHS FinnTwin GS20K H2000 HCHS hunt KORA_F4 KORA_S3 Korcula LBC1936 MESA_AFA_new MESA_CAU_new MESA_HIS_new NEO NFBC66 NFBC86 orcades PIVUS QBB Raine RS1 RS2 RS3 SAPALDIA_Edinburgh SAPALDIA_Gabriel SHIP-1 SHIP-TREND-0 SHIP-TREND-0_B2 Split Twins_UK UKB_AFR UKB_AMR UKB_EAS UKB_EUR UKB_SAS UKHLS VIKING Vis YFS	0.432064	0.147385	0.00561406	0.39331	0.210497	581878	581876	577208	421045	0.4166	0.416	0.4201	0.4187	0.0078	0.0111	-0.0001	0.0086	0.001	0.0012	0.0001	0.0031	1.669e-14	3.695e-20	0.5663	0.00559	FOXP1(PoPs,nearest)
PDZRN3	rs766206762	TRUE	rs4677294	31911640	3_73565946_A_ACAGGACACGGAGTC	3	73565946	PEF	PEF,FEV1	A	ACAGGACACGGAGTC	0.355	0.355	-7.125	1.04e-12	?-??????????????+----?	ALSPAC ARIC_AA B58C EPIC FinnTwin hunt LBC1936 orcades Raine RS1 RS2 RS3 SHIP-1 SHIP-TREND-0 SHIP-TREND-0_B2 Split UKB_AFR UKB_AMR UKB_EAS UKB_EUR UKB_SAS VIKING	0.361915	0.146911	0.136936	0.317337	0.238919	448164	448164	448164	349113	0.3211	0.3164	0.3438	0.3546	-0.0071	-0.0053	-0.0008	-0.0254	0.0012	0.0014	0.0002	0.0037	1.235e-09	0.0001197	6.898e-08	5.438e-12	PDZRN3(eQTL,PoPs,nearest), ENSG00000278934(eQTL), PDZRN3-AS1(eQTL)
PDZRN3-AS1	rs291536	TRUE	rs586936	30804560	3_73859961_C_T	3	73859961	FEV1/FVC		T	C	0.556	0.444	-8.527	1.51e-17	---+---+--+-+-------+--+----+-+----++------+-----+	ALHS ALSPAC ARIC_AA ARIC_EA B58C BHS CHSAA CHSEA CKB EPIC EXCEED FHS FinnTwin GS20K H2000 HCHS hunt KORA_F4 KORA_S3 Korcula LBC1936 MESA_AFA_new MESA_CAU_new MESA_HIS_new NEO NFBC66 NFBC86 orcades PIVUS QBB Raine RS1 RS2 RS3 SAPALDIA_Edinburgh SAPALDIA_Gabriel SHIP-1 SHIP-TREND-0 SHIP-TREND-0_B2 Split Twins_UK UKB_AFR UKB_AMR UKB_EAS UKB_EUR UKB_SAS UKHLS VIKING Vis YFS	0.600571	0.480036	0.285134	0.6389	0.537591	581851	581849	577181	421045	0.5493	0.5422	0.5828	0.5923	-0.0065	-0.0038	-0.0011	-0.0117	0.0009	0.0011	0.0001	0.0031	3.46e-12	0.000587	1.019e-14	0.0002095	PDZRN3(eQTL,PoPs), PDZRN3-AS1(eQTL,nearest), ENSG00000278934(eQTL)
DCBLD2	rs774735	TRUE	rs6778584	30061609	3_98873985_C_G	3	98873985	FVC	FEV1,FVC	C	G	0.295	0.295	-12.948	2.43e-38	--+---+-----------+--+----+-----+------+-------+-+	ALHS ALSPAC ARIC_AA ARIC_EA B58C BHS CHSAA CHSEA CKB EPIC EXCEED FHS FinnTwin GS20K H2000 HCHS hunt KORA_F4 KORA_S3 Korcula LBC1936 MESA_AFA_new MESA_CAU_new MESA_HIS_new NEO NFBC66 NFBC86 orcades PIVUS QBB Raine RS1 RS2 RS3 SAPALDIA_Edinburgh SAPALDIA_Gabriel SHIP-1 SHIP-TREND-0 SHIP-TREND-0_B2 Split Twins_UK UKB_AFR UKB_AMR UKB_EAS UKB_EUR UKB_SAS UKHLS VIKING Vis YFS	0.297201	0.836605	0.220368	0.348963	0.429209	581883	581881	577213	421045	0.2935	0.2924	0.3018	0.3137	-0.012	-0.0148	-0.0002	-0.0136	0.001	0.0012	0.0001	0.0033	1.73e-32	4.076e-36	0.2963	4.904e-05	COL8A1(PoPs), DCBLD2(nearest)
MIR548G	rs1849496	FALSE			3_99328145_A_C	3	99328145	FEV1/FVC		A	C	0.0615	0.0615	6.741	1.57e-11	+++++++-+-+++-+-+-+-+++--+++-+--+-+++-+	ALHS ALSPAC ARIC_EA B58C BHS CHSEA EPIC EXCEED FHS FinnTwin GS20K H2000 hunt KORA_F4 KORA_S3 Korcula LBC1936 MESA_CAU_new NEO NFBC66 NFBC86 orcades PIVUS Raine RS1 RS2 RS3 SAPALDIA_Edinburgh SAPALDIA_Gabriel SHIP-1 SHIP-TREND-0 SHIP-TREND-0_B2 Split Twins_UK UKB_EUR UKHLS VIKING Vis YFS	0.060465	0.147169	0.14517	0.040447	0.0981522	581888	581886	577218	421045	0.0909	0.0922	0.0786	0.0663	-0.0021	-0.0098	0.0019	0.014	0.0017	0.002	0.0003	0.0063	0.2017	6.403e-07	4.722e-13	0.02484	FILIP1L(PoPs), MIR548G(nearest)
MIR548G	rs17834371	FALSE			3_99403730_G_T	3	99403730	FEV1/FVC		T	G	0.0414	0.0414	9.136	6.46e-20	-++--+-++++++++++++0++++++++-+-++++-++++++-++++-+-	ALHS ALSPAC ARIC_AA ARIC_EA B58C BHS CHSAA CHSEA CKB EPIC EXCEED FHS FinnTwin GS20K H2000 HCHS hunt KORA_F4 KORA_S3 Korcula LBC1936 MESA_AFA_new MESA_CAU_new MESA_HIS_new NEO NFBC66 NFBC86 orcades PIVUS QBB Raine RS1 RS2 RS3 SAPALDIA_Edinburgh SAPALDIA_Gabriel SHIP-1 SHIP-TREND-0 SHIP-TREND-0_B2 Split Twins_UK UKB_AFR UKB_AMR UKB_EAS UKB_EUR UKB_SAS UKHLS VIKING Vis YFS	0.0414397	0.00511372	0.0330299	0.0332647	0.122165	581570	581568	576900	421045	0.0456	0.0453	0.0464	0.0457	0.0027	-0.008	0.0028	0.0318	0.0023	0.0027	0.0003	0.0077	0.2457	0.003122	5.577e-17	3.248e-05	FILIP1L(PoPs), MIR548G(nearest)
MIR548G	rs681819	FALSE			3_99414198_A_G	3	99414198	FEV1/FVC		A	G	0.345	0.345	6.045	1.49e-09	++-+++-+--++++++---+-+++-++++-+++++++++	ALHS ALSPAC ARIC_EA B58C BHS CHSEA EPIC EXCEED FHS FinnTwin GS20K H2000 hunt KORA_F4 KORA_S3 Korcula LBC1936 MESA_CAU_new NEO NFBC66 NFBC86 orcades PIVUS Raine RS1 RS2 RS3 SAPALDIA_Edinburgh SAPALDIA_Gabriel SHIP-1 SHIP-TREND-0 SHIP-TREND-0_B2 Split Twins_UK UKB_EUR UKHLS VIKING Vis YFS	0.344021	0.0576773	0.472557	0.399886	0.268513	581888	581886	577218	421045	0.3709	0.3724	0.3531	0.3399	0.0032	0.0019	0.0006	0.013	0.0009	0.0011	0.0001	0.0032	0.0008121	0.08375	7.978e-05	6.342e-05	FILIP1L(PoPs), MIR548G(nearest), RP11-15N24.4(eQTL)
MIR548G	rs1610265	TRUE	rs1610265	30804560	3_99420192_C_T	3	99420192	FVC	FEV1,FVC	T	C	0.0832	0.0832	-8.931	4.22e-19	------+------+-----+-+++--++++----+---+++++--+---	ALHS ALSPAC ARIC_AA ARIC_EA B58C BHS CHSAA CHSEA CKB EPIC EXCEED FHS FinnTwin GS20K H2000 HCHS hunt KORA_F4 KORA_S3 Korcula LBC1936 MESA_AFA_new MESA_CAU_new MESA_HIS_new NEO NFBC66 NFBC86 orcades PIVUS Raine RS1 RS2 RS3 SAPALDIA_Edinburgh SAPALDIA_Gabriel SHIP-1 SHIP-TREND-0 SHIP-TREND-0_B2 Split Twins_UK UKB_AFR UKB_AMR UKB_EAS UKB_EUR UKB_SAS UKHLS VIKING Vis YFS	0.0774781	0.178212	0.101695	0.0447266	0.165581	581884	581882	577214	421045	0.0906	0.0917	0.085	0.0806	-0.0125	-0.0164	0.0002	-0.0161	0.0016	0.0019	0.0002	0.0057	1.376e-14	1.768e-18	0.4874	0.004446	COL8A1(PoPs), MIR548G(nearest)
PHLDB2	rs9843288	FALSE			3_111504556_A_T	3	111504556	PEF		A	T	0.189	0.189	-6.025	1.7e-09	--------+++--+----+--+	ALSPAC ARIC_AA B58C EPIC FinnTwin hunt LBC1936 orcades Raine RS1 RS2 RS3 SHIP-1 SHIP-TREND-0 SHIP-TREND-0_B2 Split UKB_AFR UKB_AMR UKB_EAS UKB_EUR UKB_SAS VIKING	0.182883	0.519235	0.0723121	0.128513	0.128752	581888	581886	577218	421045	0.1848	0.184	0.1911	0.1908	-0.0044	-0.0026	-0.0006	-0.0231	0.0012	0.0014	0.0002	0.0039	0.0003697	0.07427	0.000567	3.799e-09	PHLDB2(PoPs,nearest)
BOC	rs6769798	FALSE			3_112951348_A_G	3	112951348	FEV1/FVC		A	G	0.83	0.17	7.131	9.94e-13	-++-++--++++-++++-++-++-++++-+-+-++--+-+--+++-++++	ALHS ALSPAC ARIC_AA ARIC_EA B58C BHS CHSAA CHSEA CKB EPIC EXCEED FHS FinnTwin GS20K H2000 HCHS hunt KORA_F4 KORA_S3 Korcula LBC1936 MESA_AFA_new MESA_CAU_new MESA_HIS_new NEO NFBC66 NFBC86 orcades PIVUS QBB Raine RS1 RS2 RS3 SAPALDIA_Edinburgh SAPALDIA_Gabriel SHIP-1 SHIP-TREND-0 SHIP-TREND-0_B2 Split Twins_UK UKB_AFR UKB_AMR UKB_EAS UKB_EUR UKB_SAS UKHLS VIKING Vis YFS	0.831397	0.98623	0.828357	0.91508	0.863475	581889	581887	577219	421045	0.824	0.8232	0.8305	0.8352	0.0035	-0.0012	0.0012	0.0142	0.0012	0.0014	0.0002	0.0043	0.004289	0.4109	9.242e-12	0.0008778	BOC(PoPs,nearest)
BOC	rs775230	FALSE			3_113001706_A_G	3	113001706	FEV1		A	G	0.669	0.331	-6.124	9.14e-10	-+----+-----++-----------+-----+----+--++++-------	ALHS ALSPAC ARIC_AA ARIC_EA B58C BHS CHSAA CHSEA CKB EPIC EXCEED FHS FinnTwin GS20K H2000 HCHS hunt KORA_F4 KORA_S3 Korcula LBC1936 MESA_AFA_new MESA_CAU_new MESA_HIS_new NEO NFBC66 NFBC86 orcades PIVUS QBB Raine RS1 RS2 RS3 SAPALDIA_Edinburgh SAPALDIA_Gabriel SHIP-1 SHIP-TREND-0 SHIP-TREND-0_B2 Split Twins_UK UKB_AFR UKB_AMR UKB_EAS UKB_EUR UKB_SAS UKHLS VIKING Vis YFS	0.725468	0.478584	0.438125	0.715273	0.601425	581889	581887	577219	421045	0.648	0.6402	0.6834	0.7163	-0.005	-0.0031	-0.0007	-0.0165	0.001	0.0011	0.0001	0.0034	3.033e-07	0.006359	5.604e-07	1.066e-06	BOC(PoPs,nearest)
B4GALT4-AS1	rs16829666	FALSE			3_118999310_A_G	3	118999310	FEV1	FEV1,FF	A	G	0.897	0.103	7.878	3.32e-15	+++++-++++-+-+-+++++-++++-++-+-+--+--+-+++++++++--	ALHS ALSPAC ARIC_AA ARIC_EA B58C BHS CHSAA CHSEA CKB EPIC EXCEED FHS FinnTwin GS20K H2000 HCHS hunt KORA_F4 KORA_S3 Korcula LBC1936 MESA_AFA_new MESA_CAU_new MESA_HIS_new NEO NFBC66 NFBC86 orcades PIVUS QBB Raine RS1 RS2 RS3 SAPALDIA_Edinburgh SAPALDIA_Gabriel SHIP-1 SHIP-TREND-0 SHIP-TREND-0_B2 Split Twins_UK UKB_AFR UKB_AMR UKB_EAS UKB_EUR UKB_SAS UKHLS VIKING Vis YFS	0.919856	0.541637	0.814258	0.886526	0.786066	581889	581887	577219	421045	0.8706	0.8685	0.8874	0.9009	0.0113	0.0089	0.0012	0.0211	0.0015	0.0017	0.0002	0.0055	2.704e-14	2.256e-07	4.359e-07	0.0001141	ARHGAP31(eQTL,PoPs), B4GALT4-AS1(nearest), TIMMDC1(rare_disease)
FAM162A	rs10511410	FALSE			3_122128519_C_G	3	122128519	FVC	FEV1,FVC	C	G	0.27	0.27	-6.877	6.13e-12	----------+-+-----+-+-+--+-------+-------+++-++---	ALHS ALSPAC ARIC_AA ARIC_EA B58C BHS CHSAA CHSEA CKB EPIC EXCEED FHS FinnTwin GS20K H2000 HCHS hunt KORA_F4 KORA_S3 Korcula LBC1936 MESA_AFA_new MESA_CAU_new MESA_HIS_new NEO NFBC66 NFBC86 orcades PIVUS QBB Raine RS1 RS2 RS3 SAPALDIA_Edinburgh SAPALDIA_Gabriel SHIP-1 SHIP-TREND-0 SHIP-TREND-0_B2 Split Twins_UK UKB_AFR UKB_AMR UKB_EAS UKB_EUR UKB_SAS UKHLS VIKING Vis YFS	0.282392	0.133409	0.22376	0.238218	0.266316	581883	581881	577213	421045	0.2706	0.2698	0.2775	0.276	-0.0056	-0.0084	0.0002	-0.0047	0.001	0.0012	0.0001	0.0034	4.542e-08	2.417e-12	0.111	0.1711	FAM162A(PoPs,nearest), CSTA(eQTL), WDR5B(eQTL)
EEFSEC	rs6809833	TRUE	rs2811415	28166213	3_127952919_A_G	3	127952919	FEV1/FVC	FEV1,FF	A	G	0.107	0.107	12.284	1.1e-34	-+++++--+-+++++++++--++-++-+-+-+++++-++++++-+++++-	ALHS ALSPAC ARIC_AA ARIC_EA B58C BHS CHSAA CHSEA CKB EPIC EXCEED FHS FinnTwin GS20K H2000 HCHS hunt KORA_F4 KORA_S3 Korcula LBC1936 MESA_AFA_new MESA_CAU_new MESA_HIS_new NEO NFBC66 NFBC86 orcades PIVUS QBB Raine RS1 RS2 RS3 SAPALDIA_Edinburgh SAPALDIA_Gabriel SHIP-1 SHIP-TREND-0 SHIP-TREND-0_B2 Split Twins_UK UKB_AFR UKB_AMR UKB_EAS UKB_EUR UKB_SAS UKHLS VIKING Vis YFS	0.119696	0.320538	0.006793	0.111191	0.175223	581889	581887	577219	421045	0.1266	0.1266	0.1264	0.1343	0.0081	-0.0011	0.0025	0.0105	0.0015	0.0018	0.0002	0.0047	8.576e-08	0.5547	2.637e-34	0.02435	EEFSEC(nearest), GP9(eQTL), SEC61A1(PoPs)
CEP63	rs754129950	FALSE			3_134301062_T_TG	3	134301062	FEV1	FEV1,FVC	T	TG	0.702	0.298	-7.538	4.77e-14	??-?????-?????+--????+?-?????-???????????-+--+????	ALHS ALSPAC ARIC_AA ARIC_EA B58C BHS CHSAA CHSEA CKB EPIC EXCEED FHS FinnTwin GS20K H2000 HCHS hunt KORA_F4 KORA_S3 Korcula LBC1936 MESA_AFA_new MESA_CAU_new MESA_HIS_new NEO NFBC66 NFBC86 orcades PIVUS QBB Raine RS1 RS2 RS3 SAPALDIA_Edinburgh SAPALDIA_Gabriel SHIP-1 SHIP-TREND-0 SHIP-TREND-0_B2 Split Twins_UK UKB_AFR UKB_AMR UKB_EAS UKB_EUR UKB_SAS UKHLS VIKING Vis YFS	0.672813	0.486402	0.800306	0.666276	0.672707	464518	464518	464518	365467	0.6993	0.7022	0.6797	0.6723	-0.0085	-0.0092	-0.0003	-0.0168	0.0011	0.0013	0.0002	0.0037	7.31e-14	4.062e-12	0.03947	5.31e-06	AMOTL2(PoPs), CEP63(nearest)
CLDN18	rs182770	FALSE			3_137763021_A_G	3	137763021	FEV1/FVC		A	G	0.45	0.45	5.904	3.54e-09	-+-+-+-++++++++++-++--++++-+++-+-+---+-+-++-+-+-+-	ALHS ALSPAC ARIC_AA ARIC_EA B58C BHS CHSAA CHSEA CKB EPIC EXCEED FHS FinnTwin GS20K H2000 HCHS hunt KORA_F4 KORA_S3 Korcula LBC1936 MESA_AFA_new MESA_CAU_new MESA_HIS_new NEO NFBC66 NFBC86 orcades PIVUS QBB Raine RS1 RS2 RS3 SAPALDIA_Edinburgh SAPALDIA_Gabriel SHIP-1 SHIP-TREND-0 SHIP-TREND-0_B2 Split Twins_UK UKB_AFR UKB_AMR UKB_EAS UKB_EUR UKB_SAS UKHLS VIKING Vis YFS	0.483043	0.252426	0.316902	0.522404	0.46264	581882	581880	577212	421045	0.4481	0.4455	0.4667	0.4726	0.0005	-0.0025	0.0007	0.0029	0.0009	0.0011	0.0001	0.0031	0.5938	0.0193	7.52e-08	0.3383	CLDN18(eQTL,mouse_KO,PoPs,nearest)
MRAS	rs731632	FALSE			3_138078662_A_G	3	138078662	FVC		A	G	0.331	0.331	-6.207	5.39e-10	-+---++-+-+-+-------+++--+--++-++----+-+-----+----	ALHS ALSPAC ARIC_AA ARIC_EA B58C BHS CHSAA CHSEA CKB EPIC EXCEED FHS FinnTwin GS20K H2000 HCHS hunt KORA_F4 KORA_S3 Korcula LBC1936 MESA_AFA_new MESA_CAU_new MESA_HIS_new NEO NFBC66 NFBC86 orcades PIVUS QBB Raine RS1 RS2 RS3 SAPALDIA_Edinburgh SAPALDIA_Gabriel SHIP-1 SHIP-TREND-0 SHIP-TREND-0_B2 Split Twins_UK UKB_AFR UKB_AMR UKB_EAS UKB_EUR UKB_SAS UKHLS VIKING Vis YFS	0.34737	0.273936	0.266213	0.377932	0.312505	581888	581886	577218	421045	0.3292	0.3284	0.3396	0.3503	-0.0038	-0.0061	0.0002	-0.0048	0.001	0.0011	0.0001	0.0032	7.243e-05	7.52e-08	0.1057	0.1402	DBR1(eQTL), DZIP1L(PoPs), MRAS(nearest)
ZBTB38	rs7625643	FALSE			3_141150026_A_G	3	141150026	PEF		A	G	0.551	0.449	7.157	8.27e-13	?+??????????????+++++?	ALSPAC ARIC_AA B58C EPIC FinnTwin hunt LBC1936 orcades Raine RS1 RS2 RS3 SHIP-1 SHIP-TREND-0 SHIP-TREND-0_B2 Split UKB_AFR UKB_AMR UKB_EAS UKB_EUR UKB_SAS VIKING	0.55364	0.256535	0.686341	0.631464	0.694935	448164	448164	448164	349113	0.5782	0.5813	0.5602	0.5528	0.0061	0.0053	0.0007	0.0247	0.0011	0.0013	0.0001	0.0036	1.547e-08	2.111e-05	1.314e-06	4.372e-12	ZBTB38(eQTL,PoPs,nearest), GK5(eQTL)
ZIC4	3:146906766_TA_T	FALSE			3_146906766_T_TA	3	146906766	FVC		T	TA	0.143	0.143	-6.055	1.4e-09	??-?????-?????+--????+?-?????+???????????--+--????	ALHS ALSPAC ARIC_AA ARIC_EA B58C BHS CHSAA CHSEA CKB EPIC EXCEED FHS FinnTwin GS20K H2000 HCHS hunt KORA_F4 KORA_S3 Korcula LBC1936 MESA_AFA_new MESA_CAU_new MESA_HIS_new NEO NFBC66 NFBC86 orcades PIVUS QBB Raine RS1 RS2 RS3 SAPALDIA_Edinburgh SAPALDIA_Gabriel SHIP-1 SHIP-TREND-0 SHIP-TREND-0_B2 Split Twins_UK UKB_AFR UKB_AMR UKB_EAS UKB_EUR UKB_SAS UKHLS VIKING Vis YFS	0.183789	0.0164424	0.00611053	0.122288	0.0636245	464518	464518	464518	365467	0.1769	0.1769	0.1795	0.1809	-0.0075	-0.0116	0.0002	-0.013	0.0016	0.0018	0.0002	0.0045	1.392e-06	2.456e-10	0.2948	0.004266	ZIC1(PoPs), ZIC4(nearest)
ARHGEF26-AS1	rs1713831	FALSE			3_153836299_C_T	3	153836299	FEV1/FVC		T	C	0.119	0.119	-6.156	7.44e-10	-+-+--++-----+---+----++---+--++-----++---+--+-+--	ALHS ALSPAC ARIC_AA ARIC_EA B58C BHS CHSAA CHSEA CKB EPIC EXCEED FHS FinnTwin GS20K H2000 HCHS hunt KORA_F4 KORA_S3 Korcula LBC1936 MESA_AFA_new MESA_CAU_new MESA_HIS_new NEO NFBC66 NFBC86 orcades PIVUS QBB Raine RS1 RS2 RS3 SAPALDIA_Edinburgh SAPALDIA_Gabriel SHIP-1 SHIP-TREND-0 SHIP-TREND-0_B2 Split Twins_UK UKB_AFR UKB_AMR UKB_EAS UKB_EUR UKB_SAS UKHLS VIKING Vis YFS	0.145744	0.017155	0.004013	0.053432	0.028664	581889	581887	577219	421045	0.1427	0.1428	0.1437	0.1518	-0.0003	0.0043	-0.001	-0.0154	0.0015	0.0017	0.0002	0.0044	0.8554	0.01151	1.783e-07	0.0004864	ARHGEF26(eQTL,PoPs), ARHGEF26-AS1(eQTL,nearest), DHX36(eQTL)
RSRC1	rs4680444	TRUE	rs1595029	26635082	3_158260514_A_G	3	158260514	FVC	FEV1,FVC	A	G	0.752	0.248	11.925	8.82e-33	++-+++-+++++-+++++-+++++++++-++-++++--++++-+++++++	ALHS ALSPAC ARIC_AA ARIC_EA B58C BHS CHSAA CHSEA CKB EPIC EXCEED FHS FinnTwin GS20K H2000 HCHS hunt KORA_F4 KORA_S3 Korcula LBC1936 MESA_AFA_new MESA_CAU_new MESA_HIS_new NEO NFBC66 NFBC86 orcades PIVUS QBB Raine RS1 RS2 RS3 SAPALDIA_Edinburgh SAPALDIA_Gabriel SHIP-1 SHIP-TREND-0 SHIP-TREND-0_B2 Split Twins_UK UKB_AFR UKB_AMR UKB_EAS UKB_EUR UKB_SAS UKHLS VIKING Vis YFS	0.730777	0.77344	0.851993	0.78808	0.687232	581889	581887	577219	421045	0.7491	0.7511	0.739	0.7361	0.0108	0.0149	-0.0003	0.0027	0.0011	0.0012	0.0002	0.0034	1.124e-24	1.447e-33	0.03566	0.436	RSRC1(eQTL,PoPs,nearest), C3orf55(eQTL), GFM1(eQTL), MLF1(eQTL), RP11-379F4.4(eQTL), RP11-379F4.7(eQTL)
LOC100507661	rs879394	TRUE	esv2660202	28166213	3_168709843_G_T	3	168709843	FEV1	PEF,FEV1,FF	T	G	0.248	0.248	-12.505	7.02e-36	-+-------------------+---------+----+-+---++----+-	ALHS ALSPAC ARIC_AA ARIC_EA B58C BHS CHSAA CHSEA CKB EPIC EXCEED FHS FinnTwin GS20K H2000 HCHS hunt KORA_F4 KORA_S3 Korcula LBC1936 MESA_AFA_new MESA_CAU_new MESA_HIS_new NEO NFBC66 NFBC86 orcades PIVUS QBB Raine RS1 RS2 RS3 SAPALDIA_Edinburgh SAPALDIA_Gabriel SHIP-1 SHIP-TREND-0 SHIP-TREND-0_B2 Split Twins_UK UKB_AFR UKB_AMR UKB_EAS UKB_EUR UKB_SAS UKHLS VIKING Vis YFS	0.234817	0.226025	0.282379	0.190277	0.199275	581887	581885	577217	421045	0.254	0.2565	0.2424	0.2341	-0.0123	-0.0082	-0.0019	-0.0372	0.0011	0.0012	0.0002	0.0036	7.628e-32	1.552e-11	6.802e-33	6.033e-25	LOC100507661(nearest), MECOM(PoPs)
MECOM	rs73166118	FALSE			3_168729715_C_T	3	168729715	FEV1/FVC	FEV1,FF	T	C	0.0077	0.0077	-8	1.24e-15	--?---?-?---?----++--?---?++--------+++???-?-+-?	ALHS ALSPAC ARIC_AA ARIC_EA B58C BHS CHSAA CHSEA CKB EPIC EXCEED FHS FinnTwin GS20K H2000 HCHS hunt KORA_F4 KORA_S3 Korcula LBC1936 MESA_AFA_new MESA_CAU_new MESA_HIS_new NEO NFBC66 NFBC86 orcades PIVUS Raine RS1 RS2 RS3 SAPALDIA_Edinburgh SAPALDIA_Gabriel SHIP-1 SHIP-TREND-0 SHIP-TREND-0_B2 Split Twins_UK UKB_AFR UKB_EAS UKB_EUR UKB_SAS UKHLS VIKING Vis YFS	0.00792861	0.00102098	0.00174264	0.0167066	0.00356477	456342	456339	451673	409121	0.0079	0.0079	0.008	0.0078	-0.027	-0.0033	-0.0065	-0.096	0.0062	0.0074	0.0008	0.0184	1.471e-05	0.6528	1.852e-14	1.692e-07	MECOM(PoPs,nearest)
MECOM	rs6806825	FALSE			3_168789705_C_T	3	168789705	FVC		T	C	0.375	0.375	-7.129	1.01e-12	++---+-----+------+-+-+--+--++----+-+--+-+------	ALHS ALSPAC ARIC_AA ARIC_EA B58C BHS CHSAA CHSEA CKB EPIC FHS FinnTwin GS20K H2000 HCHS hunt KORA_F4 KORA_S3 Korcula LBC1936 MESA_AFA_new MESA_CAU_new MESA_HIS_new NEO NFBC66 NFBC86 orcades PIVUS Raine RS1 RS2 RS3 SAPALDIA_Edinburgh SAPALDIA_Gabriel SHIP-1 SHIP-TREND-0 SHIP-TREND-0_B2 Split Twins_UK UKB_AFR UKB_AMR UKB_EAS UKB_EUR UKB_SAS UKHLS VIKING Vis YFS	0.350688	0.270232	0.517924	0.390898	0.404675	581889	581887	577219	421045	0.3932	0.395	0.3692	0.3602	-0.0098	-0.0072	-0.0014	-0.0235	0.0009	0.0011	0.0001	0.0032	1.144e-25	7.134e-11	4.324e-24	2.203e-13	MECOM(PoPs,nearest)
MECOM	rs78101726	TRUE	rs1344555	21946350	3_169295436_A_G	3	169295436	FEV1	FEV1,FVC,FF	A	G	0.818	0.182	11.452	2.29e-30	++++++++++++++++++++-++++-++++++-++++++-+++++++-	ALHS ALSPAC ARIC_AA ARIC_EA B58C BHS CHSAA CHSEA CKB EPIC EXCEED FHS FinnTwin GS20K H2000 HCHS hunt KORA_F4 KORA_S3 Korcula LBC1936 MESA_AFA_new MESA_CAU_new MESA_HIS_new NEO NFBC66 NFBC86 orcades PIVUS Raine RS1 RS2 RS3 SAPALDIA_Edinburgh SAPALDIA_Gabriel SHIP-1 SHIP-TREND-0 SHIP-TREND-0_B2 Split Twins_UK UKB_AFR UKB_EAS UKB_EUR UKB_SAS UKHLS VIKING Vis YFS	0.846875	0.881347	0.611328	0.878699	0.780508	581887	581885	577217	421045	0.7759	0.7682	0.8133	0.8449	0.0124	0.0113	0.0012	0.0125	0.0012	0.0013	0.0002	0.0042	3.212e-26	4.498e-17	9.504e-12	0.003178	MECOM(PoPs,nearest)
FNDC3B	rs62283811	FALSE			3_171820890_C_T	3	171820890	FEV1/FVC		T	C	0.0725	0.0725	8.185	2.72e-16	+++++++-+-++-++++++--+--+++-++++--+++++++++++-++--	ALHS ALSPAC ARIC_AA ARIC_EA B58C BHS CHSAA CHSEA CKB EPIC EXCEED FHS FinnTwin GS20K H2000 HCHS hunt KORA_F4 KORA_S3 Korcula LBC1936 MESA_AFA_new MESA_CAU_new MESA_HIS_new NEO NFBC66 NFBC86 orcades PIVUS QBB Raine RS1 RS2 RS3 SAPALDIA_Edinburgh SAPALDIA_Gabriel SHIP-1 SHIP-TREND-0 SHIP-TREND-0_B2 Split Twins_UK UKB_AFR UKB_AMR UKB_EAS UKB_EUR UKB_SAS UKHLS VIKING Vis YFS	0.0520581	0.240234	0.175446	0.0428044	0.0521289	581883	581881	577213	421045	0.1001	0.1034	0.0792	0.0618	0.0054	-0.0009	0.0021	0.0375	0.0017	0.002	0.0003	0.0067	0.001828	0.6695	6.14e-15	1.996e-08	FNDC3B(PoPs,nearest)
PARL	rs10937153	FALSE			3_183562925_A_G	3	183562925	FEV1		A	G	0.277	0.277	-6.154	7.53e-10	+++------+----------++-+--+-----++--+--------++--	ALHS ALSPAC ARIC_AA ARIC_EA B58C BHS CHSAA CHSEA CKB EPIC EXCEED FHS FinnTwin GS20K H2000 HCHS hunt KORA_F4 KORA_S3 Korcula LBC1936 MESA_AFA_new MESA_CAU_new MESA_HIS_new NEO NFBC66 NFBC86 orcades PIVUS Raine RS1 RS2 RS3 SAPALDIA_Edinburgh SAPALDIA_Gabriel SHIP-1 SHIP-TREND-0 SHIP-TREND-0_B2 Split Twins_UK UKB_AFR UKB_AMR UKB_EAS UKB_EUR UKB_SAS UKHLS VIKING Vis YFS	0.2411	0.264029	0.544402	0.261671	0.306061	581889	581887	577219	421045	0.3112	0.3188	0.2721	0.2439	-0.0059	-0.0059	-0.0005	-0.0127	0.001	0.0012	0.0002	0.0035	6.52e-09	5.396e-07	0.002211	0.000361	YEATS2(eQTL,PoPs), PARL(nearest)
IGF2BP2	rs7615045	TRUE	rs6780171	30804560	3_185521126_A_G	3	185521126	PEF	PEF,FEV1	A	G	0.676	0.324	9.747	1.89e-22	++++-++--++++-++++++++	ALSPAC ARIC_AA B58C EPIC FinnTwin hunt LBC1936 orcades Raine RS1 RS2 RS3 SHIP-1 SHIP-TREND-0 SHIP-TREND-0_B2 Split UKB_AFR UKB_AMR UKB_EAS UKB_EUR UKB_SAS VIKING	0.685058	0.162741	0.740556	0.619038	0.563242	581889	581887	577219	421045	0.6868	0.6885	0.681	0.6822	0.0068	0.0056	0.0006	0.0317	0.001	0.0011	0.0001	0.0033	5.353e-12	9.609e-07	7.457e-06	5.115e-22	IGF2BP2(eQTL,WES,PoPs,nearest)
DGKG	rs7618021	FALSE			3_186083611_C_T	3	186083611	FEV1/FVC		T	C	0.341	0.341	7.103	1.22e-12	++++++++++-+-++-+++++--++++++--+-+++++-++++-+++++-	ALHS ALSPAC ARIC_AA ARIC_EA B58C BHS CHSAA CHSEA CKB EPIC EXCEED FHS FinnTwin GS20K H2000 HCHS hunt KORA_F4 KORA_S3 Korcula LBC1936 MESA_AFA_new MESA_CAU_new MESA_HIS_new NEO NFBC66 NFBC86 orcades PIVUS QBB Raine RS1 RS2 RS3 SAPALDIA_Edinburgh SAPALDIA_Gabriel SHIP-1 SHIP-TREND-0 SHIP-TREND-0_B2 Split Twins_UK UKB_AFR UKB_AMR UKB_EAS UKB_EUR UKB_SAS UKHLS VIKING Vis YFS	0.280993	0.428004	0.598072	0.371581	0.395485	581889	581887	577219	421045	0.3557	0.364	0.3161	0.2886	0.004	0.0012	0.001	0.0136	0.001	0.0012	0.0001	0.0034	7.175e-05	0.3144	4.42e-11	7.206e-05	DGKG(PoPs,nearest)
DLG1	3:196956325_TA_T	FALSE			3_196956325_T_TA	3	196956325	FVC	PEF,FVC	T	TA	0.551	0.449	6.338	2.33e-10	??-?????+????????????????????????????????--++-????	ALHS ALSPAC ARIC_AA ARIC_EA B58C BHS CHSAA CHSEA CKB EPIC EXCEED FHS FinnTwin GS20K H2000 HCHS hunt KORA_F4 KORA_S3 Korcula LBC1936 MESA_AFA_new MESA_CAU_new MESA_HIS_new NEO NFBC66 NFBC86 orcades PIVUS QBB Raine RS1 RS2 RS3 SAPALDIA_Edinburgh SAPALDIA_Gabriel SHIP-1 SHIP-TREND-0 SHIP-TREND-0_B2 Split Twins_UK UKB_AFR UKB_AMR UKB_EAS UKB_EUR UKB_SAS UKHLS VIKING Vis YFS	0.48755	0.210907	0.777675	0.473485	0.643251	420050	420050	420050	336335	0.5447	0.5511	0.5024	0.4874	0.0056	0.0085	-0.0003	0.0136	0.0011	0.0013	0.0002	0.0036	1.276e-06	3.096e-10	0.0316	0.0001768	DLG1(eQTL,PoPs,nearest), MFI2(eQTL), PIGZ(eQTL)
SLBP	4:1712880_AT_A	FALSE			4_1712880_A_AT	4	1712880	PEF	PEF,FEV1	A	AT	0.336	0.336	-7.694	1.43e-14	?+??????????????+++--?	ALSPAC ARIC_AA B58C EPIC FinnTwin hunt LBC1936 orcades Raine RS1 RS2 RS3 SHIP-1 SHIP-TREND-0 SHIP-TREND-0_B2 Split UKB_AFR UKB_AMR UKB_EAS UKB_EUR UKB_SAS VIKING	0.335821	0.122134	0.692958	0.359114	0.502887	431596	431596	431596	336335	0.4222	0.4339	0.3618	0.3383	-0.0068	-0.0067	-0.0005	-0.0296	0.0011	0.0013	0.0002	0.0038	2.003e-09	4.541e-07	0.003677	5.349e-15	FGFR3(rare_disease,PoPs), SLBP(eQTL,nearest), FAM53A(eQTL), TACC3(eQTL), TMEM129(eQTL)
FGFR3	rs3135877	FALSE			4_1804276_A_G	4	1804276	FEV1/FVC	FEV1,FF	A	G	0.0478	0.0478	8.332	7.98e-17	++-+++-++++++++++-+++-+++++--++-++++---++++++++---	ALHS ALSPAC ARIC_AA ARIC_EA B58C BHS CHSAA CHSEA CKB EPIC EXCEED FHS FinnTwin GS20K H2000 HCHS hunt KORA_F4 KORA_S3 Korcula LBC1936 MESA_AFA_new MESA_CAU_new MESA_HIS_new NEO NFBC66 NFBC86 orcades PIVUS QBB Raine RS1 RS2 RS3 SAPALDIA_Edinburgh SAPALDIA_Gabriel SHIP-1 SHIP-TREND-0 SHIP-TREND-0_B2 Split Twins_UK UKB_AFR UKB_AMR UKB_EAS UKB_EUR UKB_SAS UKHLS VIKING Vis YFS	0.0425841	0.123239	0.0271689	0.0639497	0.0962864	581801	581799	577131	420663	0.054	0.0538	0.0536	0.0516	0.0117	0.0051	0.0024	0.0339	0.0022	0.0025	0.0003	0.0075	8.023e-08	0.04539	4.063e-14	5.409e-06	FGFR3(rare_disease,PoPs,nearest), CPLX1(eQTL), DGKQ(eQTL), FGFRL1(eQTL), GAK(eQTL), IDUA(eQTL), SLC26A1(eQTL)
TNIP2	rs6422312	FALSE			4_2769571_G_T	4	2769571	FEV1/FVC		T	G	0.566	0.434	-6.086	1.16e-09	-------+----+----??--++-----+------------+-----+?	ALHS ALSPAC ARIC_AA ARIC_EA B58C BHS CHSAA CHSEA CKB EPIC EXCEED FHS FinnTwin GS20K H2000 HCHS hunt KORA_F4 KORA_S3 Korcula LBC1936 MESA_AFA_new MESA_CAU_new MESA_HIS_new NEO NFBC66 NFBC86 orcades PIVUS Raine RS1 RS2 RS3 SAPALDIA_Edinburgh SAPALDIA_Gabriel SHIP-1 SHIP-TREND-0 SHIP-TREND-0_B2 Split Twins_UK UKB_AFR UKB_AMR UKB_EAS UKB_EUR UKB_SAS UKHLS VIKING Vis YFS	0.562167	0.704685	0.508169	0.603209	0.673798	581470	581468	576800	420663	0.5673	0.5669	0.5673	0.5629	-0.0032	-0.0007	-0.0008	-0.0082	0.0009	0.0011	0.0001	0.0031	0.0004234	0.504	7.306e-09	0.008581	TNIP2(eQTL,nearest), ADD1(PoPs), RNF4(eQTL), RP11-503N18.5(eQTL), ZFYVE28(eQTL)
DOK7	rs11733064	FALSE			4_3495283_C_G	4	3495283	FVC	FEV1,FVC	C	G	0.659	0.341	8.536	1.39e-17	+-++++--++-++++++-+++++-+++---+++++--++++-+++-+--+	ALHS ALSPAC ARIC_AA ARIC_EA B58C BHS CHSAA CHSEA CKB EPIC EXCEED FHS FinnTwin GS20K H2000 HCHS hunt KORA_F4 KORA_S3 Korcula LBC1936 MESA_AFA_new MESA_CAU_new MESA_HIS_new NEO NFBC66 NFBC86 orcades PIVUS QBB Raine RS1 RS2 RS3 SAPALDIA_Edinburgh SAPALDIA_Gabriel SHIP-1 SHIP-TREND-0 SHIP-TREND-0_B2 Split Twins_UK UKB_AFR UKB_AMR UKB_EAS UKB_EUR UKB_SAS UKHLS VIKING Vis YFS	0.62576	0.602979	0.825122	0.635484	0.555516	581889	581887	577219	420663	0.6506	0.6537	0.6353	0.6288	0.0068	0.0092	-0.0002	0.0107	0.001	0.0011	0.0001	0.0032	2.748e-12	9.697e-16	0.2085	0.0007306	DOK7(rare_disease,nearest), HTT(eQTL,PoPs), MSANTD1(eQTL,mouse_KO), ADD1(eQTL), GRK4(eQTL), HTT-AS(eQTL), NOP14(eQTL), NOP14-AS1(eQTL)
CYTL1	rs11722554	FALSE			4_5016883_A_G	4	5016883	PEF		A	G	0.0378	0.0378	-12.046	2.03e-33	++------+------++----	ALSPAC ARIC_AA B58C EPIC FinnTwin hunt LBC1936 orcades Raine RS1 RS2 RS3 SHIP-1 SHIP-TREND-0 SHIP-TREND-0_B2 Split UKB_AFR UKB_AMR UKB_EUR UKB_SAS VIKING	0.0380486	0.00378519	0.00287724	0.0520014	0.0462529	496610	496608	491940	419099	0.0404	0.0405	0.0402	0.0377	0.0051	0.0102	-0.0008	-0.0817	0.0026	0.0031	0.0004	0.0081	0.05176	0.0009654	0.02021	6.184e-24	CYTL1(eQTL,PoPs,credible,nearest)
CYTL1	rs35263598	FALSE			4_5021149_A_G	4	5021149	PEF		A	G	0.152	0.152	-12.813	1.39e-37	+------+----------+-+-	ALSPAC ARIC_AA B58C EPIC FinnTwin hunt LBC1936 orcades Raine RS1 RS2 RS3 SHIP-1 SHIP-TREND-0 SHIP-TREND-0_B2 Split UKB_AFR UKB_AMR UKB_EAS UKB_EUR UKB_SAS VIKING	0.152845	0.117374	0.00424126	0.178021	0.12205	581887	581885	577217	420663	0.1512	0.151	0.1513	0.1509	-0.0059	-0.0072	-0.0002	-0.0516	0.0014	0.0016	0.0002	0.0043	2.564e-05	1.153e-05	0.3014	9.374e-34	CYTL1(eQTL,PoPs,nearest), STK32B(eQTL)
BLOC1S4	rs17794883	FALSE			4_6734407_A_C	4	6734407	FEV1/FVC		A	C	0.239	0.239	6.329	2.46e-10	+++++-+-+++++-+-+-+---+-+---+++--+---++++-++-++--	ALHS ALSPAC ARIC_AA ARIC_EA B58C BHS CHSAA CHSEA CKB EPIC EXCEED FHS FinnTwin GS20K H2000 HCHS hunt KORA_F4 KORA_S3 Korcula LBC1936 MESA_AFA_new MESA_CAU_new MESA_HIS_new NEO NFBC66 NFBC86 orcades PIVUS Raine RS1 RS2 RS3 SAPALDIA_Edinburgh SAPALDIA_Gabriel SHIP-1 SHIP-TREND-0 SHIP-TREND-0_B2 Split Twins_UK UKB_AFR UKB_AMR UKB_EAS UKB_EUR UKB_SAS UKHLS VIKING Vis YFS	0.239849	0.150756	0.248208	0.277269	0.334895	581856	581854	577186	420663	0.2418	0.2417	0.2393	0.2356	0.001	-0.002	0.0009	0.011	0.0011	0.0013	0.0002	0.0036	0.3631	0.1108	3.524e-08	0.002617	BLOC1S4(PoPs,nearest)
AFAP1	rs28370977	TRUE	rs28520091	30061609	4_7894414_G_T	4	7894414	FEV1/FVC	FEV1,FF	T	G	0.48	0.48	-8.483	2.2e-17	-++---+---+-+-----+--+-----++?+-+++--+----------+-	ALHS ALSPAC ARIC_AA ARIC_EA B58C BHS CHSAA CHSEA CKB EPIC EXCEED FHS FinnTwin GS20K H2000 HCHS hunt KORA_F4 KORA_S3 Korcula LBC1936 MESA_AFA_new MESA_CAU_new MESA_HIS_new NEO NFBC66 NFBC86 orcades PIVUS QBB Raine RS1 RS2 RS3 SAPALDIA_Edinburgh SAPALDIA_Gabriel SHIP-1 SHIP-TREND-0 SHIP-TREND-0_B2 Split Twins_UK UKB_AFR UKB_AMR UKB_EAS UKB_EUR UKB_SAS UKHLS VIKING Vis YFS	0.401251	0.81797	0.830622	0.475159	0.707943	570342	570340	565672	420663	0.4678	0.4738	0.4328	0.4205	-0.0052	-0.0018	-0.001	-0.0103	0.001	0.0011	0.0001	0.0031	1.074e-07	0.1187	8.021e-14	0.0009585	AFAP1(eQTL,PoPs,nearest)
RAB28	rs13150673	FALSE			4_12838159_C_T	4	12838159	PEF		T	C	0.308	0.308	7.406	1.3e-13	---++++++++++++++++++-	ALSPAC ARIC_AA B58C EPIC FinnTwin hunt LBC1936 orcades Raine RS1 RS2 RS3 SHIP-1 SHIP-TREND-0 SHIP-TREND-0_B2 Split UKB_AFR UKB_AMR UKB_EAS UKB_EUR UKB_SAS VIKING	0.306878	0.249494	0.599769	0.30936	0.50339	581882	581880	574612	420663	0.3624	0.3697	0.3296	0.3051	0.0034	0.0049	-0.0001	0.0259	0.001	0.0011	0.0001	0.0033	0.0005407	1.323e-05	0.4774	5.915e-15	RAB28(nearest)
RAB28	rs10489032	FALSE			4_12921102_C_T	4	12921102	FVC	FEV1,FVC	T	C	0.657	0.343	-7.18	6.97e-13	--+-+-----+-+-+--+-++-++---+----+++--+--+-------+-	ALHS ALSPAC ARIC_AA ARIC_EA B58C BHS CHSAA CHSEA CKB EPIC EXCEED FHS FinnTwin GS20K H2000 HCHS hunt KORA_F4 KORA_S3 Korcula LBC1936 MESA_AFA_new MESA_CAU_new MESA_HIS_new NEO NFBC66 NFBC86 orcades PIVUS QBB Raine RS1 RS2 RS3 SAPALDIA_Edinburgh SAPALDIA_Gabriel SHIP-1 SHIP-TREND-0 SHIP-TREND-0_B2 Split Twins_UK UKB_AFR UKB_AMR UKB_EAS UKB_EUR UKB_SAS UKHLS VIKING Vis YFS	0.682452	0.954288	0.507419	0.72581	0.527657	581889	581887	577219	420663	0.6407	0.6386	0.665	0.6849	-0.0056	-0.008	0.0002	-0.0214	0.001	0.0011	0.0001	0.0033	5.837e-09	8.923e-13	0.1693	8.876e-11	RAB28(PoPs,nearest)
RAB28	rs4565095	FALSE			4_13234668_A_G	4	13234668	FEV1/FVC		A	G	0.278	0.278	-6.037	1.57e-09	??+?????-????????????????????????????????++---????	ALHS ALSPAC ARIC_AA ARIC_EA B58C BHS CHSAA CHSEA CKB EPIC EXCEED FHS FinnTwin GS20K H2000 HCHS hunt KORA_F4 KORA_S3 Korcula LBC1936 MESA_AFA_new MESA_CAU_new MESA_HIS_new NEO NFBC66 NFBC86 orcades PIVUS QBB Raine RS1 RS2 RS3 SAPALDIA_Edinburgh SAPALDIA_Gabriel SHIP-1 SHIP-TREND-0 SHIP-TREND-0_B2 Split Twins_UK UKB_AFR UKB_AMR UKB_EAS UKB_EUR UKB_SAS UKHLS VIKING Vis YFS	0.334982	0.43266	0.0404731	0.370956	0.504703	420050	420050	420050	336335	0.3306	0.3295	0.337	0.3392	0.0002	0.0047	-0.0009	0.0017	0.0013	0.0015	0.0002	0.0038	0.875	0.002187	3.516e-08	0.6566	RAB28(PoPs,nearest)
LOC101929123	4:17086493_GA_G	FALSE			4_17086493_G_GA	4	17086493	FEV1/FVC		G	GA	0.216	0.216	5.891	3.83e-09	??+?????+?????+++????+?+?????+???????????-+-++????	ALHS ALSPAC ARIC_AA ARIC_EA B58C BHS CHSAA CHSEA CKB EPIC EXCEED FHS FinnTwin GS20K H2000 HCHS hunt KORA_F4 KORA_S3 Korcula LBC1936 MESA_AFA_new MESA_CAU_new MESA_HIS_new NEO NFBC66 NFBC86 orcades PIVUS QBB Raine RS1 RS2 RS3 SAPALDIA_Edinburgh SAPALDIA_Gabriel SHIP-1 SHIP-TREND-0 SHIP-TREND-0_B2 Split Twins_UK UKB_AFR UKB_AMR UKB_EAS UKB_EUR UKB_SAS UKHLS VIKING Vis YFS	0.204536	0.0336826	0.292771	0.192331	0.121796	464518	464518	464518	365467	0.2264	0.2294	0.2111	0.2045	0.0051	0.0023	0.001	0.0044	0.0013	0.0015	0.0002	0.0043	4.968e-05	0.1146	6.13e-08	0.3158	LDB2(PoPs), LOC101929123(nearest)
FAM184B	rs7674450	FALSE			4_17792249_C_G	4	17792249	FVC	FEV1,FVC	C	G	0.187	0.187	-6.273	3.54e-10	--+-++---+----+-----+-+---++-++--+-++---+------++-	ALHS ALSPAC ARIC_AA ARIC_EA B58C BHS CHSAA CHSEA CKB EPIC EXCEED FHS FinnTwin GS20K H2000 HCHS hunt KORA_F4 KORA_S3 Korcula LBC1936 MESA_AFA_new MESA_CAU_new MESA_HIS_new NEO NFBC66 NFBC86 orcades PIVUS QBB Raine RS1 RS2 RS3 SAPALDIA_Edinburgh SAPALDIA_Gabriel SHIP-1 SHIP-TREND-0 SHIP-TREND-0_B2 Split Twins_UK UKB_AFR UKB_AMR UKB_EAS UKB_EUR UKB_SAS UKHLS VIKING Vis YFS	0.15616	0.527915	0.342354	0.280073	0.372547	581882	581880	577212	420663	0.2129	0.2174	0.1863	0.1693	-0.0063	-0.0081	0.0001	-0.0156	0.0012	0.0014	0.0002	0.0042	8.075e-08	2.271e-09	0.6366	0.0001813	FAM184B(nearest), LCORL(PoPs), NCAPG(WES)
PPARGC1A	rs648674	FALSE			4_24026481_A_G	4	24026481	FEV1/FVC		A	G	0.563	0.437	7.883	3.2e-15	+++++++-++++-+-+++++-++-++++-++++-+++-++++-++-++++	ALHS ALSPAC ARIC_AA ARIC_EA B58C BHS CHSAA CHSEA CKB EPIC EXCEED FHS FinnTwin GS20K H2000 HCHS hunt KORA_F4 KORA_S3 Korcula LBC1936 MESA_AFA_new MESA_CAU_new MESA_HIS_new NEO NFBC66 NFBC86 orcades PIVUS QBB Raine RS1 RS2 RS3 SAPALDIA_Edinburgh SAPALDIA_Gabriel SHIP-1 SHIP-TREND-0 SHIP-TREND-0_B2 Split Twins_UK UKB_AFR UKB_AMR UKB_EAS UKB_EUR UKB_SAS UKHLS VIKING Vis YFS	0.578713	0.696391	0.499344	0.615127	0.649667	581888	581886	577218	420663	0.5574	0.5563	0.5697	0.5825	0.0005	-0.0038	0.001	0.0107	0.0009	0.0011	0.0001	0.0031	0.5852	0.0003873	1.614e-13	0.0005444	PPARGC1A(eQTL,PoPs,nearest)
ANAPC4	rs34811474	FALSE			4_25408838_A_G	4	25408838	FVC	FEV1,FVC	A	G	0.22	0.22	7.764	8.21e-15	++++++++?+++-++++--++++--++-++++--+++++-+++++-++++	ALHS ALSPAC ARIC_AA ARIC_EA B58C BHS CHSAA CHSEA CKB EPIC EXCEED FHS FinnTwin GS20K H2000 HCHS hunt KORA_F4 KORA_S3 Korcula LBC1936 MESA_AFA_new MESA_CAU_new MESA_HIS_new NEO NFBC66 NFBC86 orcades PIVUS QBB Raine RS1 RS2 RS3 SAPALDIA_Edinburgh SAPALDIA_Gabriel SHIP-1 SHIP-TREND-0 SHIP-TREND-0_B2 Split Twins_UK UKB_AFR UKB_AMR UKB_EAS UKB_EUR UKB_SAS UKHLS VIKING Vis YFS	0.231557	0.0215283	0.00191816	0.193352	0.0642857	496499	496497	491829	419099	0.2249	0.225	0.2267	0.225	0.0087	0.0114	0.0001	0.0102	0.0012	0.0015	0.0002	0.0037	1.73e-12	9.764e-15	0.7074	0.006298	ANAPC4(credible,nearest), SEPSECS(eQTL), SLC34A2(rare_disease), ZCCHC4(PoPs)
LOC439933	rs115503647	FALSE			4_36271840_A_G	4	36271840	FEV1/FVC		A	G	0.95	0.05	8.145	3.79e-16	+--+++++?-++-+++++---+++++++-?-+-++-+-+++++?+++--+	ALHS ALSPAC ARIC_AA ARIC_EA B58C BHS CHSAA CHSEA CKB EPIC EXCEED FHS FinnTwin GS20K H2000 HCHS hunt KORA_F4 KORA_S3 Korcula LBC1936 MESA_AFA_new MESA_CAU_new MESA_HIS_new NEO NFBC66 NFBC86 orcades PIVUS QBB Raine RS1 RS2 RS3 SAPALDIA_Edinburgh SAPALDIA_Gabriel SHIP-1 SHIP-TREND-0 SHIP-TREND-0_B2 Split Twins_UK UKB_AFR UKB_AMR UKB_EAS UKB_EUR UKB_SAS UKHLS VIKING Vis YFS	0.947246	0.996451	0.999041	0.965332	0.994614	484948	484946	480278	419099	0.9484	0.9484	0.9482	0.9488	0.0068	-0.0023	0.0025	0.0215	0.0023	0.0028	0.0003	0.007	0.003543	0.4101	2.099e-15	0.00232	ARAP2(PoPs), LOC439933(nearest)
SCFD2	rs301127	FALSE			4_53795612_A_T	4	53795612	FEV1/FVC		A	T	0.757	0.243	-7.331	2.28e-13	+------+----------+--++---+--+-+++------------+++	ALHS ALSPAC ARIC_AA ARIC_EA B58C BHS CHSAA CHSEA CKB EPIC EXCEED FHS FinnTwin GS20K H2000 HCHS hunt KORA_F4 KORA_S3 Korcula LBC1936 MESA_AFA_new MESA_CAU_new MESA_HIS_new NEO NFBC66 NFBC86 orcades PIVUS Raine RS1 RS2 RS3 SAPALDIA_Edinburgh SAPALDIA_Gabriel SHIP-1 SHIP-TREND-0 SHIP-TREND-0_B2 Split Twins_UK UKB_AFR UKB_AMR UKB_EAS UKB_EUR UKB_SAS UKHLS VIKING Vis YFS	0.800491	0.522784	0.481001	0.812857	0.705712	581889	581887	577219	420663	0.7056	0.696	0.7569	0.7935	-0.0038	-0.0007	-0.0011	-0.0117	0.0011	0.0012	0.0002	0.0038	0.0003165	0.5729	8.327e-13	0.001943	RASL11B(PoPs), SCFD2(nearest)
LOC100506444	rs6816871	FALSE			4_54653236_A_T	4	54653236	FEV1/FVC		A	T	0.533	0.467	-7.334	2.23e-13	-------+---------+-++++--+--+---+----++------+-+++	ALHS ALSPAC ARIC_AA ARIC_EA B58C BHS CHSAA CHSEA CKB EPIC EXCEED FHS FinnTwin GS20K H2000 HCHS hunt KORA_F4 KORA_S3 Korcula LBC1936 MESA_AFA_new MESA_CAU_new MESA_HIS_new NEO NFBC66 NFBC86 orcades PIVUS QBB Raine RS1 RS2 RS3 SAPALDIA_Edinburgh SAPALDIA_Gabriel SHIP-1 SHIP-TREND-0 SHIP-TREND-0_B2 Split Twins_UK UKB_AFR UKB_AMR UKB_EAS UKB_EUR UKB_SAS UKHLS VIKING Vis YFS	0.559476	0.179733	0.390575	0.560491	0.508573	581888	581886	577218	420663	0.5294	0.5267	0.5445	0.5589	-0.0024	0.001	-0.0009	-0.0136	0.0009	0.0011	0.0001	0.0031	0.008946	0.3428	6.075e-12	1.096e-05	CHIC2(PoPs), LOC100506444(nearest)
PDGFRA	rs6831380	FALSE			4_55076345_A_G	4	55076345	FEV1/FVC		A	G	0.237	0.237	6.486	8.83e-11	-++-+++-+++--++++-++-+++++-++-++--+++++-+?-+-+++-	ALHS ALSPAC ARIC_AA ARIC_EA B58C BHS CHSAA CHSEA CKB EPIC EXCEED FHS FinnTwin GS20K H2000 HCHS hunt KORA_F4 KORA_S3 Korcula LBC1936 MESA_AFA_new MESA_CAU_new MESA_HIS_new NEO NFBC66 NFBC86 orcades PIVUS Raine RS1 RS2 RS3 SAPALDIA_Edinburgh SAPALDIA_Gabriel SHIP-1 SHIP-TREND-0 SHIP-TREND-0_B2 Split Twins_UK UKB_AFR UKB_AMR UKB_EAS UKB_EUR UKB_SAS UKHLS VIKING Vis YFS	0.233036	0.23716	0.232557	0.121969	0.255393	581887	581885	577217	420663	0.2398	0.2402	0.2377	0.2348	0.0003	-0.0039	0.001	0.0168	0.0011	0.0012	0.0002	0.0036	0.7634	0.001494	3.667e-10	2.918e-06	PDGFRA(PoPs,nearest)
KDR	rs6554237	TRUE	rs12331869	30804560	4_56025361_C_T	4	56025361	FVC		T	C	0.5	0.5	7.098	1.26e-12	-++++--++++--+-+++-+-+--++++++-+++++++-++++++++-+-	ALHS ALSPAC ARIC_AA ARIC_EA B58C BHS CHSAA CHSEA CKB EPIC EXCEED FHS FinnTwin GS20K H2000 HCHS hunt KORA_F4 KORA_S3 Korcula LBC1936 MESA_AFA_new MESA_CAU_new MESA_HIS_new NEO NFBC66 NFBC86 orcades PIVUS QBB Raine RS1 RS2 RS3 SAPALDIA_Edinburgh SAPALDIA_Gabriel SHIP-1 SHIP-TREND-0 SHIP-TREND-0_B2 Split Twins_UK UKB_AFR UKB_AMR UKB_EAS UKB_EUR UKB_SAS UKHLS VIKING Vis YFS	0.483473	0.555071	0.535129	0.448389	0.394741	581884	581882	577214	420663	0.5033	0.504	0.4937	0.4812	0.0048	0.0069	-0.0003	0.0039	0.0009	0.0011	0.0001	0.0031	1.12e-07	9.03e-11	0.03993	0.2033	KDR(PoPs,nearest)
REST	rs12641030	FALSE			4_57803505_A_G	4	57803505	FEV1		A	G	0.554	0.446	6.788	1.14e-11	+-++-++-+-+++++-++-++-+++-+-++--+-+++++++++-++++++	ALHS ALSPAC ARIC_AA ARIC_EA B58C BHS CHSAA CHSEA CKB EPIC EXCEED FHS FinnTwin GS20K H2000 HCHS hunt KORA_F4 KORA_S3 Korcula LBC1936 MESA_AFA_new MESA_CAU_new MESA_HIS_new NEO NFBC66 NFBC86 orcades PIVUS QBB Raine RS1 RS2 RS3 SAPALDIA_Edinburgh SAPALDIA_Gabriel SHIP-1 SHIP-TREND-0 SHIP-TREND-0_B2 Split Twins_UK UKB_AFR UKB_AMR UKB_EAS UKB_EUR UKB_SAS UKHLS VIKING Vis YFS	0.532958	0.486706	0.706735	0.500872	0.670891	581888	581886	577218	420663	0.5564	0.5602	0.5402	0.5376	0.0058	0.0055	0.0006	0.0162	0.0009	0.0011	0.0001	0.0031	2.102e-10	3.304e-07	2.478e-06	1.232e-07	REST(PoPs,nearest), IGFBP7(eQTL)
LPHN3-AS1	rs13147521	FALSE			4_63923215_A_T	4	63923215	FEV1/FVC		A	T	0.642	0.358	-6.059	1.37e-09	-------------+-----+++-+-++-+--+--+-++-+-+-+-+----	ALHS ALSPAC ARIC_AA ARIC_EA B58C BHS CHSAA CHSEA CKB EPIC EXCEED FHS FinnTwin GS20K H2000 HCHS hunt KORA_F4 KORA_S3 Korcula LBC1936 MESA_AFA_new MESA_CAU_new MESA_HIS_new NEO NFBC66 NFBC86 orcades PIVUS QBB Raine RS1 RS2 RS3 SAPALDIA_Edinburgh SAPALDIA_Gabriel SHIP-1 SHIP-TREND-0 SHIP-TREND-0_B2 Split Twins_UK UKB_AFR UKB_AMR UKB_EAS UKB_EUR UKB_SAS UKHLS VIKING Vis YFS	0.694806	0.369468	0.385495	0.68664	0.511853	581889	581887	577219	420663	0.6249	0.617	0.661	0.679	-0.0043	-0.0023	-0.0008	-0.0115	0.001	0.0011	0.0001	0.0033	1.173e-05	0.04337	3.474e-08	0.000501	LPHN3-AS1(nearest)
ADAMTS3	rs719381	FALSE			4_73453998_C_T	4	73453998	FVC		T	C	0.532	0.468	6.091	1.13e-09	-+++++++++++-+-+++++--+++++++++++-+++--+++-+++-++-	ALHS ALSPAC ARIC_AA ARIC_EA B58C BHS CHSAA CHSEA CKB EPIC EXCEED FHS FinnTwin GS20K H2000 HCHS hunt KORA_F4 KORA_S3 Korcula LBC1936 MESA_AFA_new MESA_CAU_new MESA_HIS_new NEO NFBC66 NFBC86 orcades PIVUS QBB Raine RS1 RS2 RS3 SAPALDIA_Edinburgh SAPALDIA_Gabriel SHIP-1 SHIP-TREND-0 SHIP-TREND-0_B2 Split Twins_UK UKB_AFR UKB_AMR UKB_EAS UKB_EUR UKB_SAS UKHLS VIKING Vis YFS	0.548563	0.261806	0.422038	0.602648	0.384269	581889	581887	577219	420663	0.5291	0.5273	0.5384	0.5405	0.0044	0.0059	0	0.005	0.0009	0.0011	0.0001	0.0031	1.636e-06	2.461e-08	0.8751	0.1065	ADAMTS3(PoPs,nearest)
BTC	rs62316311	TRUE	rs62316310	30804560	4_75676572_A_G	4	75676572	FEV1/FVC	FEV1,FF	A	G	0.227	0.227	8.727	2.61e-18	++++++-+---+++++++++++++-++++-+-+-++-++++++-+-+++-	ALHS ALSPAC ARIC_AA ARIC_EA B58C BHS CHSAA CHSEA CKB EPIC EXCEED FHS FinnTwin GS20K H2000 HCHS hunt KORA_F4 KORA_S3 Korcula LBC1936 MESA_AFA_new MESA_CAU_new MESA_HIS_new NEO NFBC66 NFBC86 orcades PIVUS QBB Raine RS1 RS2 RS3 SAPALDIA_Edinburgh SAPALDIA_Gabriel SHIP-1 SHIP-TREND-0 SHIP-TREND-0_B2 Split Twins_UK UKB_AFR UKB_AMR UKB_EAS UKB_EUR UKB_SAS UKHLS VIKING Vis YFS	0.261574	0.266905	0.0529462	0.318405	0.248922	581878	581876	577208	420663	0.2502	0.2484	0.2561	0.2566	0.0082	0.0035	0.0015	0.0138	0.0011	0.0013	0.0002	0.0035	3.343e-13	0.007349	9.773e-22	7.816e-05	BTC(nearest), PARM1(PoPs)
LOC441025	rs75169792	FALSE			4_76205812_A_C	4	76205812	FEV1/FVC		A	C	0.923	0.077	-6.664	2.66e-11	--+-+-------+++--++-+-+----++++++---+-----+-+----	ALHS ALSPAC ARIC_AA ARIC_EA B58C BHS CHSAA CHSEA CKB EPIC EXCEED FHS FinnTwin GS20K H2000 HCHS hunt KORA_F4 KORA_S3 Korcula LBC1936 MESA_AFA_new MESA_CAU_new MESA_HIS_new NEO NFBC66 NFBC86 orcades PIVUS Raine RS1 RS2 RS3 SAPALDIA_Edinburgh SAPALDIA_Gabriel SHIP-1 SHIP-TREND-0 SHIP-TREND-0_B2 Split Twins_UK UKB_AFR UKB_AMR UKB_EAS UKB_EUR UKB_SAS UKHLS VIKING Vis YFS	0.916205	0.803218	0.982888	0.917698	0.906281	581888	581886	577218	420663	0.9144	0.9146	0.9129	0.9142	-0.0059	0	-0.0014	-0.0278	0.0018	0.0021	0.0002	0.0055	0.0007922	0.9875	3.33e-09	4.238e-07	LOC441025(nearest), PARM1(PoPs)
FRAS1	rs4975128	TRUE	rs11098196	30804560	4_79408604_A_G	4	79408604	FEV1/FVC		A	G	0.506	0.494	-9.522	1.69e-21	--+-------+-+------+----+----+------++--+------+--	ALHS ALSPAC ARIC_AA ARIC_EA B58C BHS CHSAA CHSEA CKB EPIC EXCEED FHS FinnTwin GS20K H2000 HCHS hunt KORA_F4 KORA_S3 Korcula LBC1936 MESA_AFA_new MESA_CAU_new MESA_HIS_new NEO NFBC66 NFBC86 orcades PIVUS QBB Raine RS1 RS2 RS3 SAPALDIA_Edinburgh SAPALDIA_Gabriel SHIP-1 SHIP-TREND-0 SHIP-TREND-0_B2 Split Twins_UK UKB_AFR UKB_AMR UKB_EAS UKB_EUR UKB_SAS UKHLS VIKING Vis YFS	0.503867	0.456707	0.494912	0.511524	0.424864	581878	581876	577208	420663	0.5044	0.504	0.5072	0.5024	-0.0034	0.0008	-0.0012	-0.0124	0.0009	0.0011	0.0001	0.0031	0.0001888	0.4679	2.909e-19	4.716e-05	FRAS1(PoPs,nearest)
BMP2K	rs2033061	FALSE			4_79816601_C_T	4	79816601	FEV1	FEV1,FVC	T	C	0.929	0.071	-6.279	3.42e-10	+++------+--+-----+-+-+------+------+-+--+-------+	ALHS ALSPAC ARIC_AA ARIC_EA B58C BHS CHSAA CHSEA CKB EPIC EXCEED FHS FinnTwin GS20K H2000 HCHS hunt KORA_F4 KORA_S3 Korcula LBC1936 MESA_AFA_new MESA_CAU_new MESA_HIS_new NEO NFBC66 NFBC86 orcades PIVUS QBB Raine RS1 RS2 RS3 SAPALDIA_Edinburgh SAPALDIA_Gabriel SHIP-1 SHIP-TREND-0 SHIP-TREND-0_B2 Split Twins_UK UKB_AFR UKB_AMR UKB_EAS UKB_EUR UKB_SAS UKHLS VIKING Vis YFS	0.960768	0.626099	0.780862	0.939165	0.893378	581889	581887	577219	420663	0.8595	0.8554	0.8959	0.9325	-0.0104	-0.0117	-0.0006	-0.017	0.0017	0.002	0.0003	0.0074	1.408e-09	4.104e-09	0.02416	0.02181	BMP2K(PoPs,nearest), NAA11(mouse_KO)
LOC101928978	rs1442167	FALSE			4_85299787_C_G	4	85299787	PEF		C	G	0.172	0.172	-7.747	9.39e-15	------+--+-+--+---+---	ALSPAC ARIC_AA B58C EPIC FinnTwin hunt LBC1936 orcades Raine RS1 RS2 RS3 SHIP-1 SHIP-TREND-0 SHIP-TREND-0_B2 Split UKB_AFR UKB_AMR UKB_EAS UKB_EUR UKB_SAS VIKING	0.162882	0.615053	0.133311	0.221275	0.21589	581879	581877	577209	420663	0.1778	0.1765	0.18	0.1875	-0.0025	-0.0024	-0.0001	-0.0313	0.0012	0.0014	0.0002	0.0041	0.04735	0.0992	0.4305	2.641e-14	LOC101928978(nearest), NKX6-1(PoPs)
ARHGAP24	rs13111662	FALSE			4_86683121_C_T	4	86683121	FEV1	FEV1,FVC	T	C	0.618	0.382	-6.503	7.89e-11	+-----++----+------------+--+-----+-+-+++?-----+-	ALHS ALSPAC ARIC_AA ARIC_EA B58C BHS CHSAA CHSEA CKB EPIC EXCEED FHS FinnTwin GS20K H2000 HCHS hunt KORA_F4 KORA_S3 Korcula LBC1936 MESA_AFA_new MESA_CAU_new MESA_HIS_new NEO NFBC66 NFBC86 orcades PIVUS Raine RS1 RS2 RS3 SAPALDIA_Edinburgh SAPALDIA_Gabriel SHIP-1 SHIP-TREND-0 SHIP-TREND-0_B2 Split Twins_UK UKB_AFR UKB_AMR UKB_EAS UKB_EUR UKB_SAS UKHLS VIKING Vis YFS	0.705619	0.174689	0.09408	0.607417	0.446585	570342	570340	565672	420663	0.6316	0.6231	0.6653	0.6796	-0.006	-0.0069	-0.0002	-0.0108	0.0011	0.0012	0.0001	0.0033	1.473e-08	2.44e-08	0.2985	0.00127	ARHGAP24(PoPs,nearest)
AFF1	rs236993	FALSE			4_88016874_G_T	4	88016874	FEV1	FEV1,FVC	T	G	0.595	0.405	6.457	1.07e-10	++-++-++++++++-+++-++++++-+--++++++--++++++++--+++	ALHS ALSPAC ARIC_AA ARIC_EA B58C BHS CHSAA CHSEA CKB EPIC EXCEED FHS FinnTwin GS20K H2000 HCHS hunt KORA_F4 KORA_S3 Korcula LBC1936 MESA_AFA_new MESA_CAU_new MESA_HIS_new NEO NFBC66 NFBC86 orcades PIVUS QBB Raine RS1 RS2 RS3 SAPALDIA_Edinburgh SAPALDIA_Gabriel SHIP-1 SHIP-TREND-0 SHIP-TREND-0_B2 Split Twins_UK UKB_AFR UKB_AMR UKB_EAS UKB_EUR UKB_SAS UKHLS VIKING Vis YFS	0.601133	0.471836	0.571513	0.71186	0.492546	581888	581886	577218	420663	0.5932	0.5927	0.5958	0.5924	0.006	0.0072	0.0001	0.0137	0.0009	0.0011	0.0001	0.0031	5.222e-11	2.449e-11	0.3781	1.153e-05	AFF1(eQTL,PoPs,nearest), HSD17B13(eQTL), NUDT9(eQTL), PTPN13(eQTL), SPARCL1(eQTL)
FAM13A	rs7690881	FALSE			4_89791982_A_T	4	89791982	FEV1/FVC		A	T	0.416	0.416	10.397	2.56e-25	++?+++?+?+++-++?+++++?+?+--+-+++++-+++++???+?+-+-	ALHS ALSPAC ARIC_AA ARIC_EA B58C BHS CHSAA CHSEA CKB EPIC EXCEED FHS FinnTwin GS20K H2000 HCHS hunt KORA_F4 KORA_S3 Korcula LBC1936 MESA_AFA_new MESA_CAU_new MESA_HIS_new NEO NFBC66 NFBC86 orcades PIVUS Raine RS1 RS2 RS3 SAPALDIA_Edinburgh SAPALDIA_Gabriel SHIP-1 SHIP-TREND-0 SHIP-TREND-0_B2 Split Twins_UK UKB_AFR UKB_AMR UKB_EAS UKB_EUR UKB_SAS UKHLS VIKING Vis YFS	0.420316	0.055319	0.057882	0.489586	0.218261	581884	581882	577214	420663	0.3899	0.3865	0.4039	0.4194	0.0019	-0.0001	0.0006	0.0084	0.001	0.0012	0.0001	0.0031	0.05895	0.9585	9.929e-06	0.00696	FAM13A(eQTL,PoPs,nearest)
FAM13A	rs1246642	TRUE	rs13110699	28166213	4_89864446_C_T	4	89864446	FEV1/FVC	FVC,FF	T	C	0.747	0.253	-22.668	9.34e-114	-------------------+------------------------------	ALHS ALSPAC ARIC_AA ARIC_EA B58C BHS CHSAA CHSEA CKB EPIC EXCEED FHS FinnTwin GS20K H2000 HCHS hunt KORA_F4 KORA_S3 Korcula LBC1936 MESA_AFA_new MESA_CAU_new MESA_HIS_new NEO NFBC66 NFBC86 orcades PIVUS QBB Raine RS1 RS2 RS3 SAPALDIA_Edinburgh SAPALDIA_Gabriel SHIP-1 SHIP-TREND-0 SHIP-TREND-0_B2 Split Twins_UK UKB_AFR UKB_AMR UKB_EAS UKB_EUR UKB_SAS UKHLS VIKING Vis YFS	0.788228	0.773189	0.552106	0.763205	0.570741	581889	581887	577219	420663	0.7188	0.7124	0.7546	0.7741	-0.0033	0.0088	-0.0033	-0.0265	0.001	0.0012	0.0002	0.0037	0.00187	4.443e-13	4.83e-101	9.251e-13	FAM13A(eQTL,PoPs,nearest)
TIGD2	rs6825998	TRUE	rs2045517	20010835	4_90011642_C_T	4	90011642	PEF		T	C	0.395	0.395	7.969	1.6e-15	+++++++-++++++-+-+-+++	ALSPAC ARIC_AA B58C EPIC FinnTwin hunt LBC1936 orcades Raine RS1 RS2 RS3 SHIP-1 SHIP-TREND-0 SHIP-TREND-0_B2 Split UKB_AFR UKB_AMR UKB_EAS UKB_EUR UKB_SAS VIKING	0.388513	0.580206	0.431075	0.559861	0.495825	581887	581885	577217	420663	0.4107	0.4108	0.4044	0.3925	0.004	-0.0047	0.0024	0.024	0.0009	0.0011	0.0001	0.0031	1.36e-05	1.173e-05	1.301e-72	1.479e-14	FAM13A(eQTL,PoPs), TIGD2(nearest)
SLC39A8	rs13107325	FALSE			4_103188709_C_T	4	103188709	FVC		T	C	0.0694	0.0694	6.707	1.99e-11	+-++++++?++++++-+-+--++----+++++-++-++--+++?+-++++	ALHS ALSPAC ARIC_AA ARIC_EA B58C BHS CHSAA CHSEA CKB EPIC EXCEED FHS FinnTwin GS20K H2000 HCHS hunt KORA_F4 KORA_S3 Korcula LBC1936 MESA_AFA_new MESA_CAU_new MESA_HIS_new NEO NFBC66 NFBC86 orcades PIVUS QBB Raine RS1 RS2 RS3 SAPALDIA_Edinburgh SAPALDIA_Gabriel SHIP-1 SHIP-TREND-0 SHIP-TREND-0_B2 Split Twins_UK UKB_AFR UKB_AMR UKB_EAS UKB_EUR UKB_SAS UKHLS VIKING Vis YFS	0.0739406	0.00484978	0.000319693	0.106862	0.0029274	496610	496608	491940	419099	0.0735	0.0734	0.0736	0.0726	0.0106	0.0153	-0.0006	0.0148	0.002	0.0023	0.0003	0.006	8.7e-08	8.328e-11	0.02528	0.01279	NFKB1(rare_disease,PoPs), SLC39A8(credible,nearest), MANBA(rare_disease)
TET2-AS1	rs7655890	TRUE	rs2047409	26423011	4_106140501_G_T	4	106140501	FEV1/FVC	PEF,FEV1,FF	T	G	0.684	0.316	-11.907	1.09e-32	--+--++----+-----+-+-+---++-+--------+--------+	ALHS ALSPAC ARIC_AA ARIC_EA B58C BHS CHSAA CHSEA EPIC EXCEED FHS FinnTwin GS20K H2000 HCHS hunt KORA_F4 KORA_S3 Korcula LBC1936 MESA_AFA_new MESA_CAU_new MESA_HIS_new NEO NFBC66 NFBC86 orcades PIVUS Raine RS1 RS2 RS3 SAPALDIA_Edinburgh SAPALDIA_Gabriel SHIP-1 SHIP-TREND-0 SHIP-TREND-0_B2 Split Twins_UK UKB_AFR UKB_AMR UKB_EUR UKB_SAS UKHLS VIKING Vis YFS	0.686687	0.871354	0.458892	0.600006	0.592612	581889	581887	577219	420663	0.636	0.6305	0.6641	0.6766	-0.0081	-0.0037	-0.0018	-0.019	0.001	0.0011	0.0001	0.0033	1.549e-17	0.000964	8.806e-39	7.882e-09	TET2(eQTL,PoPs), TET2-AS1(nearest)
GSTCD	rs541982053	FALSE			4_106702470_A_G	4	106702470	FEV1	FEV1,FVC	A	G	0.997	0.003	-6.945	3.79e-12	?????????????????????????????????????????-?????	ALHS ALSPAC ARIC_AA ARIC_EA B58C BHS CHSAA CHSEA EPIC EXCEED FHS FinnTwin GS20K H2000 HCHS hunt KORA_F4 KORA_S3 Korcula LBC1936 MESA_AFA_new MESA_CAU_new MESA_HIS_new NEO NFBC66 NFBC86 orcades PIVUS Raine RS1 RS2 RS3 SAPALDIA_Edinburgh SAPALDIA_Gabriel SHIP-1 SHIP-TREND-0 SHIP-TREND-0_B2 Split Twins_UK UKB_AFR UKB_AMR UKB_EUR UKB_SAS UKHLS VIKING Vis YFS	0.996594	0.999866	0.999976	0.99513	0.999576	323454	323454	323454	323454	0.9966	0.9966	0.9966	0.9966	-0.1388	-0.1373	-0.0098	-0.1498	0.0182	0.0216	0.0023	0.0518	2.057e-14	2.104e-10	1.405e-05	0.003836	GSTCD(nearest), NPNT(PoPs)
NPNT	rs72673891	TRUE	rs10516526	20010834	4_106814302_A_G	4	106814302	FEV1	FEV1,FVC,FF	A	G	0.935	0.065	-14.575	4.03e-48	--+---+----+----++---+-----+--------+-------+--	ALHS ALSPAC ARIC_AA ARIC_EA B58C BHS CHSAA CHSEA EPIC EXCEED FHS FinnTwin GS20K H2000 HCHS hunt KORA_F4 KORA_S3 Korcula LBC1936 MESA_AFA_new MESA_CAU_new MESA_HIS_new NEO NFBC66 NFBC86 orcades PIVUS Raine RS1 RS2 RS3 SAPALDIA_Edinburgh SAPALDIA_Gabriel SHIP-1 SHIP-TREND-0 SHIP-TREND-0_B2 Split Twins_UK UKB_AFR UKB_AMR UKB_EUR UKB_SAS UKHLS VIKING Vis YFS	0.933074	0.993513	0.998636	0.925294	0.977421	496608	496606	491938	419099	0.9338	0.934	0.9339	0.9345	-0.036	-0.0322	-0.0032	-0.0357	0.0021	0.0024	0.0003	0.0062	6.992e-69	4.462e-40	2.316e-29	1.003e-08	NPNT(PoPs,nearest)
NPNT	rs34712979	TRUE	rs34712979	26423011	4_106819053_A_G	4	106819053	FEV1/FVC	PEF,FEV1,FVC,FF	A	G	0.211	0.211	-25.258	9.32e-141	--+-----+----------+----------+---------++------+-	ALHS ALSPAC ARIC_AA ARIC_EA B58C BHS CHSAA CHSEA CKB EPIC EXCEED FHS FinnTwin GS20K H2000 HCHS hunt KORA_F4 KORA_S3 Korcula LBC1936 MESA_AFA_new MESA_CAU_new MESA_HIS_new NEO NFBC66 NFBC86 orcades PIVUS QBB Raine RS1 RS2 RS3 SAPALDIA_Edinburgh SAPALDIA_Gabriel SHIP-1 SHIP-TREND-0 SHIP-TREND-0_B2 Split Twins_UK UKB_AFR UKB_AMR UKB_EAS UKB_EUR UKB_SAS UKHLS VIKING Vis YFS	0.257832	0.013603	0.00159847	0.154932	0.0619438	496511	496509	491841	419099	0.2515	0.2518	0.2532	0.2512	-0.0274	-0.0152	-0.0043	-0.0562	0.0012	0.0014	0.0002	0.0036	1.5e-116	3.756e-27	2.39e-158	3.225e-55	NPNT(eQTL,PoPs,credible,nearest), RP11-710F7.2(eQTL)
TBCK	rs7340989	FALSE			4_107148720_A_G	4	107148720	FEV1/FVC		A	G	0.337	0.337	6.095	1.1e-09	--++++-++++---+++---+++++++++++--+++-++-+++++--	ALHS ALSPAC ARIC_AA ARIC_EA B58C BHS CHSAA CHSEA EPIC EXCEED FHS FinnTwin GS20K H2000 HCHS hunt KORA_F4 KORA_S3 Korcula LBC1936 MESA_AFA_new MESA_CAU_new MESA_HIS_new NEO NFBC66 NFBC86 orcades PIVUS Raine RS1 RS2 RS3 SAPALDIA_Edinburgh SAPALDIA_Gabriel SHIP-1 SHIP-TREND-0 SHIP-TREND-0_B2 Split Twins_UK UKB_AFR UKB_AMR UKB_EUR UKB_SAS UKHLS VIKING Vis YFS	0.336974	0.444532	0.134888	0.311179	0.313771	581885	581883	577215	420663	0.3154	0.3128	0.33	0.3335	0.0042	0.0026	0.0006	0.0056	0.001	0.0012	0.0001	0.0032	3.005e-05	0.02967	1.263e-05	0.08549	NPNT(PoPs), TBCK(nearest)
RPL34-AS1	rs4266352	FALSE			4_109466347_A_G	4	109466347	FVC	PEF,FEV1,FVC	A	G	0.773	0.227	6.017	1.78e-09	++++--++++-+++++++-+++--+++--++--+-+----+++++++-+-	ALHS ALSPAC ARIC_AA ARIC_EA B58C BHS CHSAA CHSEA CKB EPIC EXCEED FHS FinnTwin GS20K H2000 HCHS hunt KORA_F4 KORA_S3 Korcula LBC1936 MESA_AFA_new MESA_CAU_new MESA_HIS_new NEO NFBC66 NFBC86 orcades PIVUS QBB Raine RS1 RS2 RS3 SAPALDIA_Edinburgh SAPALDIA_Gabriel SHIP-1 SHIP-TREND-0 SHIP-TREND-0_B2 Split Twins_UK UKB_AFR UKB_AMR UKB_EAS UKB_EUR UKB_SAS UKHLS VIKING Vis YFS	0.734747	0.974238	0.964855	0.692678	0.797594	581889	581887	577219	420663	0.743	0.7438	0.7381	0.7389	0.0058	0.0081	0	0.0065	0.0011	0.0013	0.0002	0.0035	2.453e-07	9.388e-10	0.7698	0.064	RPL34-AS1(eQTL,nearest), OSTC(PoPs)
LINC01091	rs62321845	FALSE			4_124819607_A_G	4	124819607	FEV1/FVC	FEV1,FF	A	G	0.821	0.179	8.724	2.69e-18	-+++-+--+-++-+--+--+++++++++-+--++--++-+++--++++++	ALHS ALSPAC ARIC_AA ARIC_EA B58C BHS CHSAA CHSEA CKB EPIC EXCEED FHS FinnTwin GS20K H2000 HCHS hunt KORA_F4 KORA_S3 Korcula LBC1936 MESA_AFA_new MESA_CAU_new MESA_HIS_new NEO NFBC66 NFBC86 orcades PIVUS QBB Raine RS1 RS2 RS3 SAPALDIA_Edinburgh SAPALDIA_Gabriel SHIP-1 SHIP-TREND-0 SHIP-TREND-0_B2 Split Twins_UK UKB_AFR UKB_AMR UKB_EAS UKB_EUR UKB_SAS UKHLS VIKING Vis YFS	0.804083	0.872151	0.862818	0.841753	0.82078	581889	581887	577219	420663	0.8195	0.8205	0.8126	0.8102	0.0079	0.0039	0.0014	0.0168	0.0012	0.0014	0.0002	0.0039	4.185e-11	0.005079	8.698e-17	1.72e-05	LINC01091(eQTL,nearest), SPRY1(PoPs)
LINC01091	rs6857137	FALSE			4_125130440_A_G	4	125130440	FVC		A	G	0.513	0.487	-6.502	7.92e-11	--+--------+++---++-+-----+----+--+----+--+--+--++	ALHS ALSPAC ARIC_AA ARIC_EA B58C BHS CHSAA CHSEA CKB EPIC EXCEED FHS FinnTwin GS20K H2000 HCHS hunt KORA_F4 KORA_S3 Korcula LBC1936 MESA_AFA_new MESA_CAU_new MESA_HIS_new NEO NFBC66 NFBC86 orcades PIVUS QBB Raine RS1 RS2 RS3 SAPALDIA_Edinburgh SAPALDIA_Gabriel SHIP-1 SHIP-TREND-0 SHIP-TREND-0_B2 Split Twins_UK UKB_AFR UKB_AMR UKB_EAS UKB_EUR UKB_SAS UKHLS VIKING Vis YFS	0.51208	0.557192	0.553626	0.536774	0.426011	581889	581887	577219	420663	0.5137	0.5142	0.5111	0.5149	-0.0058	-0.0065	-0.0002	-0.0135	0.0009	0.0011	0.0001	0.0031	9.122e-11	4.994e-10	0.1635	9.501e-06	ANKRD50(PoPs), LINC01091(nearest)
SLC25A31	rs4834214	FALSE			4_128652227_A_G	4	128652227	FEV1	FEV1,FVC	A	G	0.551	0.449	-7.31	2.68e-13	+-+---++----+-----+----------+----+++----+-----+--	ALHS ALSPAC ARIC_AA ARIC_EA B58C BHS CHSAA CHSEA CKB EPIC EXCEED FHS FinnTwin GS20K H2000 HCHS hunt KORA_F4 KORA_S3 Korcula LBC1936 MESA_AFA_new MESA_CAU_new MESA_HIS_new NEO NFBC66 NFBC86 orcades PIVUS QBB Raine RS1 RS2 RS3 SAPALDIA_Edinburgh SAPALDIA_Gabriel SHIP-1 SHIP-TREND-0 SHIP-TREND-0_B2 Split Twins_UK UKB_AFR UKB_AMR UKB_EAS UKB_EUR UKB_SAS UKHLS VIKING Vis YFS	0.552146	0.683582	0.569585	0.640537	0.717739	581889	581887	577219	420663	0.5486	0.5478	0.5542	0.5528	-0.0064	-0.0071	-0.0003	-0.0088	0.0009	0.0011	0.0001	0.0031	1.379e-12	3.749e-11	0.0298	0.004272	INTU(PoPs), RP11-420A23.1(eQTL), SLC25A31(nearest)
NAA15	rs13119023	FALSE			4_140312819_A_G	4	140312819	FEV1/FVC		A	G	0.745	0.255	6.509	7.58e-11	++-++-+++++++-++-+-++-+-++++-+--++++--+-++--+-+++-	ALHS ALSPAC ARIC_AA ARIC_EA B58C BHS CHSAA CHSEA CKB EPIC EXCEED FHS FinnTwin GS20K H2000 HCHS hunt KORA_F4 KORA_S3 Korcula LBC1936 MESA_AFA_new MESA_CAU_new MESA_HIS_new NEO NFBC66 NFBC86 orcades PIVUS QBB Raine RS1 RS2 RS3 SAPALDIA_Edinburgh SAPALDIA_Gabriel SHIP-1 SHIP-TREND-0 SHIP-TREND-0_B2 Split Twins_UK UKB_AFR UKB_AMR UKB_EAS UKB_EUR UKB_SAS UKHLS VIKING Vis YFS	0.734105	0.579767	0.772386	0.785298	0.807012	581889	581887	577219	420663	0.7453	0.7462	0.739	0.7375	0.0042	0.0011	0.001	0.0082	0.001	0.0012	0.0002	0.0035	6.651e-05	0.3647	5.651e-12	0.01843	NAA15(nearest), SETD7(PoPs)
INPP4B	rs55909030	FALSE			4_143896607_C_T	4	143896607	FEV1		T	C	0.0444	0.0444	5.875	4.23e-09	+-+++++-+++-+++++-+++++++--+++++++-+-++++++	ALHS ALSPAC ARIC_EA B58C BHS CHSEA EPIC EXCEED FHS FinnTwin GS20K H2000 HCHS hunt KORA_F4 KORA_S3 Korcula LBC1936 MESA_CAU_new MESA_HIS_new NEO NFBC66 NFBC86 orcades PIVUS Raine RS1 RS2 RS3 SAPALDIA_Edinburgh SAPALDIA_Gabriel SHIP-1 SHIP-TREND-0 SHIP-TREND-0_B2 Split Twins_UK UKB_AMR UKB_EUR UKB_SAS UKHLS VIKING Vis YFS	0.0458964	0.00386266	0.00196078	0.0217249	0.01417	485055	485053	480385	419099	0.045	0.0449	0.0451	0.0446	0.0132	0.0119	0.001	0.0349	0.0025	0.003	0.0003	0.0076	1.605e-07	6.037e-05	0.003878	3.985e-06	INPP4B(PoPs,nearest)
HHIP-AS1	rs34345254	TRUE	rs13109426	30804560	4_145330381_A_G	4	145330381	FVC	FEV1,FVC	A	G	0.422	0.422	11.836	2.53e-32	++++++-+++++++-++-+++++++++++-++++++-++++++++-++++	ALHS ALSPAC ARIC_AA ARIC_EA B58C BHS CHSAA CHSEA CKB EPIC EXCEED FHS FinnTwin GS20K H2000 HCHS hunt KORA_F4 KORA_S3 Korcula LBC1936 MESA_AFA_new MESA_CAU_new MESA_HIS_new NEO NFBC66 NFBC86 orcades PIVUS QBB Raine RS1 RS2 RS3 SAPALDIA_Edinburgh SAPALDIA_Gabriel SHIP-1 SHIP-TREND-0 SHIP-TREND-0_B2 Split Twins_UK UKB_AFR UKB_AMR UKB_EAS UKB_EUR UKB_SAS UKHLS VIKING Vis YFS	0.408943	0.872213	0.480716	0.442478	0.375675	581889	581887	577219	420663	0.4215	0.4218	0.4165	0.4214	0.0083	0.0124	-0.0005	0.0202	0.0009	0.0011	0.0001	0.0031	1.336e-19	8.313e-31	0.0003009	7.415e-11	HHIP(PoPs), HHIP-AS1(nearest)
HHIP-AS1	rs116506616	FALSE			4_145453565_C_T	4	145453565	FEV1/FVC		T	C	0.0396	0.0396	10.558	4.68e-26	++++++-+?++++++++--+-+-+++++-++++++-++++++?++++-+	ALHS ALSPAC ARIC_AA ARIC_EA B58C BHS CHSAA CHSEA CKB EPIC EXCEED FHS FinnTwin GS20K H2000 HCHS hunt KORA_F4 KORA_S3 Korcula LBC1936 MESA_AFA_new MESA_CAU_new MESA_HIS_new NEO NFBC66 NFBC86 orcades PIVUS Raine RS1 RS2 RS3 SAPALDIA_Edinburgh SAPALDIA_Gabriel SHIP-1 SHIP-TREND-0 SHIP-TREND-0_B2 Split Twins_UK UKB_AFR UKB_AMR UKB_EAS UKB_EUR UKB_SAS UKHLS VIKING Vis YFS	0.0422602	0.00283889	0.000639386	0.0339528	0.011007	495017	495015	490347	418560	0.0406	0.0405	0.041	0.0408	-0.0072	-0.0179	0.002	-0.0225	0.0026	0.0031	0.0004	0.0079	0.006191	1.041e-08	1.765e-08	0.004218	HHIP(PoPs), HHIP-AS1(nearest)
HHIP-AS1	rs2220516	FALSE			4_145466678_C_G	4	145466678	PEF		C	G	0.857	0.143	6.846	7.61e-12	-++++++++---++++++-	ALSPAC B58C EPIC FinnTwin hunt LBC1936 orcades Raine RS1 RS2 RS3 SHIP-1 SHIP-TREND-0 SHIP-TREND-0_B2 Split UKB_AMR UKB_EUR UKB_SAS VIKING	0.859144	0.700194	0.653484	0.834335	0.681736	581889	581887	577219	420663	0.8085	0.8063	0.8331	0.847	-0.0038	-0.0119	0.0018	-0.0119	0.0012	0.0014	0.0002	0.0043	0.001426	2.453e-17	5.693e-22	0.00583	HHIP(eQTL,PoPs), HHIP-AS1(eQTL,nearest), OTUD4(eQTL)
HHIP-AS1	rs6537292	TRUE	rs138641402	19300500	4_145469968_G_T	4	145469968	FEV1/FVC	PEF,FEV1,FF	T	G	0.38	0.38	32.124	2.03e-226	++++++++++++-+++++++++++++++-++++++-++++++++++++++	ALHS ALSPAC ARIC_AA ARIC_EA B58C BHS CHSAA CHSEA CKB EPIC EXCEED FHS FinnTwin GS20K H2000 HCHS hunt KORA_F4 KORA_S3 Korcula LBC1936 MESA_AFA_new MESA_CAU_new MESA_HIS_new NEO NFBC66 NFBC86 orcades PIVUS QBB Raine RS1 RS2 RS3 SAPALDIA_Edinburgh SAPALDIA_Gabriel SHIP-1 SHIP-TREND-0 SHIP-TREND-0_B2 Split Twins_UK UKB_AFR UKB_AMR UKB_EAS UKB_EUR UKB_SAS UKHLS VIKING Vis YFS	0.39245	0.0516507	0.29453	0.345615	0.503672	581889	581887	577219	420663	0.3806	0.379	0.3917	0.3892	0.0151	0.0011	0.0044	0.0793	0.0009	0.0011	0.0001	0.0031	2.003e-58	0.3268	6.53e-228	9.49e-141	HHIP(PoPs), HHIP-AS1(nearest)
HHIP-AS1	rs34792358	FALSE			4_145549968_C_G	4	145549968	PEF		C	G	0.429	0.429	-9.164	5.02e-20	-----+-+----------+	ALSPAC B58C EPIC FinnTwin hunt LBC1936 orcades Raine RS1 RS2 RS3 SHIP-1 SHIP-TREND-0 SHIP-TREND-0_B2 Split UKB_AMR UKB_EUR UKB_SAS VIKING	0.426926	0.034852	0.229046	0.411885	0.528532	581889	581887	577219	420663	0.4001	0.3981	0.4188	0.4228	0.0022	0.0025	0.0001	0.0054	0.0009	0.0011	0.0001	0.0031	0.01789	0.02469	0.3071	0.0796	HHIP(PoPs), HHIP-AS1(nearest)
HHIP	rs1355601	FALSE			4_145580290_A_C	4	145580290	FEV1/FVC	PEF,FF	A	C	0.431	0.431	-6.959	3.42e-12	----+--------+---+++-------++--+---++-+-------+	ALHS ALSPAC ARIC_AA ARIC_EA B58C BHS CHSAA CHSEA EPIC EXCEED FHS FinnTwin GS20K H2000 HCHS hunt KORA_F4 KORA_S3 Korcula LBC1936 MESA_AFA_new MESA_CAU_new MESA_HIS_new NEO NFBC66 NFBC86 orcades PIVUS Raine RS1 RS2 RS3 SAPALDIA_Edinburgh SAPALDIA_Gabriel SHIP-1 SHIP-TREND-0 SHIP-TREND-0_B2 Split Twins_UK UKB_AFR UKB_AMR UKB_EUR UKB_SAS UKHLS VIKING Vis YFS	0.433829	0.0304712	0.229645	0.419787	0.528543	581887	581885	577217	420663	0.406	0.404	0.4254	0.4293	0.0022	0.0029	0	0.0046	0.0009	0.0011	0.0001	0.0031	0.02097	0.009174	0.9168	0.1383	HHIP(PoPs,nearest)
HHIP	rs11727676	FALSE			4_145659064_C_T	4	145659064	FVC	PEF,FEV1,FVC	T	C	0.906	0.094	8.89	6.12e-19	++?+++?+?++-+++++-+++?++++-++-+-+++++-++?+?++-+++	ALHS ALSPAC ARIC_AA ARIC_EA B58C BHS CHSAA CHSEA CKB EPIC EXCEED FHS FinnTwin GS20K H2000 HCHS hunt KORA_F4 KORA_S3 Korcula LBC1936 MESA_AFA_new MESA_CAU_new MESA_HIS_new NEO NFBC66 NFBC86 orcades PIVUS Raine RS1 RS2 RS3 SAPALDIA_Edinburgh SAPALDIA_Gabriel SHIP-1 SHIP-TREND-0 SHIP-TREND-0_B2 Split Twins_UK UKB_AFR UKB_AMR UKB_EAS UKB_EUR UKB_SAS UKHLS VIKING Vis YFS	0.903446	0.992666	0.998721	0.86812	0.987705	580239	580237	575569	419099	0.9061	0.9062	0.9053	0.9059	0.0216	0.0189	0.0021	0.079	0.0018	0.0021	0.0002	0.0053	1.056e-34	8.989e-20	5.587e-19	6.539e-50	HHIP(PoPs,nearest)
LRBA	rs2290846	FALSE			4_151199080_A_G	4	151199080	FVC	FEV1,FVC	A	G	0.269	0.269	6.182	6.34e-10	-+++++-+++++-+--++-++-++-+-++++--++-++-++++++--+++	ALHS ALSPAC ARIC_AA ARIC_EA B58C BHS CHSAA CHSEA CKB EPIC EXCEED FHS FinnTwin GS20K H2000 HCHS hunt KORA_F4 KORA_S3 Korcula LBC1936 MESA_AFA_new MESA_CAU_new MESA_HIS_new NEO NFBC66 NFBC86 orcades PIVUS QBB Raine RS1 RS2 RS3 SAPALDIA_Edinburgh SAPALDIA_Gabriel SHIP-1 SHIP-TREND-0 SHIP-TREND-0_B2 Split Twins_UK UKB_AFR UKB_AMR UKB_EAS UKB_EUR UKB_SAS UKHLS VIKING Vis YFS	0.287338	0.0159688	0.273018	0.155826	0.100117	581889	581887	577219	420663	0.2726	0.2721	0.2771	0.2791	0.0055	0.0078	-0.0001	-0.0036	0.001	0.0012	0.0001	0.0034	8.174e-08	9.322e-11	0.6392	0.2946	LRBA(rare_disease,PoPs,credible,nearest)
SFRP2	rs1105491	FALSE			4_154726634_G_T	4	154726634	FEV1/FVC		T	G	0.746	0.254	7.761	8.42e-15	+-+++---+--+-+-++++--++-++----+++-----+++-+-+++++-	ALHS ALSPAC ARIC_AA ARIC_EA B58C BHS CHSAA CHSEA CKB EPIC EXCEED FHS FinnTwin GS20K H2000 HCHS hunt KORA_F4 KORA_S3 Korcula LBC1936 MESA_AFA_new MESA_CAU_new MESA_HIS_new NEO NFBC66 NFBC86 orcades PIVUS QBB Raine RS1 RS2 RS3 SAPALDIA_Edinburgh SAPALDIA_Gabriel SHIP-1 SHIP-TREND-0 SHIP-TREND-0_B2 Split Twins_UK UKB_AFR UKB_AMR UKB_EAS UKB_EUR UKB_SAS UKHLS VIKING Vis YFS	0.747542	0.551311	0.792488	0.756197	0.806631	581888	581886	577218	420663	0.7456	0.7459	0.7434	0.7358	0.0049	0.0021	0.0012	0.0145	0.001	0.0012	0.0002	0.0035	2.14e-06	0.08671	2.204e-14	3.382e-05	SFRP2(eQTL,PoPs,nearest), RNF175(eQTL), RP11-153M7.5(eQTL), TLR2(eQTL)
CPE	rs9308105	FALSE			4_166337800_C_T	4	166337800	FVC		T	C	0.328	0.328	6.905	5.01e-12	++-+-+++++?-++-+++++-+-+++-++++++---+---+++++++--+	ALHS ALSPAC ARIC_AA ARIC_EA B58C BHS CHSAA CHSEA CKB EPIC EXCEED FHS FinnTwin GS20K H2000 HCHS hunt KORA_F4 KORA_S3 Korcula LBC1936 MESA_AFA_new MESA_CAU_new MESA_HIS_new NEO NFBC66 NFBC86 orcades PIVUS QBB Raine RS1 RS2 RS3 SAPALDIA_Edinburgh SAPALDIA_Gabriel SHIP-1 SHIP-TREND-0 SHIP-TREND-0_B2 Split Twins_UK UKB_AFR UKB_AMR UKB_EAS UKB_EUR UKB_SAS UKHLS VIKING Vis YFS	0.329934	0.320537	0.303082	0.409792	0.304577	581888	581886	577218	420663	0.3285	0.3283	0.3278	0.3242	0.0051	0.0074	-0.0003	0.0051	0.001	0.0011	0.0001	0.0033	1.219e-07	4.087e-11	0.05328	0.1177	CPE(PoPs,nearest)
HAND2	rs62341030	FALSE			4_174445282_A_G	4	174445282	PEF		A	G	0.951	0.049	6.576	4.83e-11	++++-++------+++-+++++	ALSPAC ARIC_AA B58C EPIC FinnTwin hunt LBC1936 orcades Raine RS1 RS2 RS3 SHIP-1 SHIP-TREND-0 SHIP-TREND-0_B2 Split UKB_AFR UKB_AMR UKB_EAS UKB_EUR UKB_SAS VIKING	0.950507	0.992316	0.997485	0.934222	0.925677	568776	568774	564106	419099	0.9484	0.9484	0.9482	0.951	0.0045	0.0011	0.0013	0.0475	0.0023	0.0027	0.0003	0.0072	0.05595	0.6964	6.272e-05	3.977e-11	HAND2(PoPs,nearest)
HAND2-AS1	rs10005540	TRUE	rs10005540	31911640	4_174582067_C_T	4	174582067	FVC		T	C	0.618	0.382	6.815	9.44e-12	+--+++++-+?++++-++-+-+++++++++----+-+-+++++++-+++-	ALHS ALSPAC ARIC_AA ARIC_EA B58C BHS CHSAA CHSEA CKB EPIC EXCEED FHS FinnTwin GS20K H2000 HCHS hunt KORA_F4 KORA_S3 Korcula LBC1936 MESA_AFA_new MESA_CAU_new MESA_HIS_new NEO NFBC66 NFBC86 orcades PIVUS QBB Raine RS1 RS2 RS3 SAPALDIA_Edinburgh SAPALDIA_Gabriel SHIP-1 SHIP-TREND-0 SHIP-TREND-0_B2 Split Twins_UK UKB_AFR UKB_AMR UKB_EAS UKB_EUR UKB_SAS UKHLS VIKING Vis YFS	0.614391	0.749071	0.620177	0.665677	0.623804	581851	581849	577181	420663	0.6183	0.6186	0.616	0.6075	0.0044	0.0066	-0.0003	0.0089	0.0009	0.0011	0.0001	0.0032	3.475e-06	2.61e-09	0.0575	0.004922	HAND2(PoPs), HAND2-AS1(nearest)
VEGFC	rs1874540	FALSE			4_177762977_A_G	4	177762977	FEV1/FVC		A	G	0.266	0.266	-5.981	2.22e-09	-----++--+-+------++--+++---+----+++--+--+-+-----+	ALHS ALSPAC ARIC_AA ARIC_EA B58C BHS CHSAA CHSEA CKB EPIC EXCEED FHS FinnTwin GS20K H2000 HCHS hunt KORA_F4 KORA_S3 Korcula LBC1936 MESA_AFA_new MESA_CAU_new MESA_HIS_new NEO NFBC66 NFBC86 orcades PIVUS QBB Raine RS1 RS2 RS3 SAPALDIA_Edinburgh SAPALDIA_Gabriel SHIP-1 SHIP-TREND-0 SHIP-TREND-0_B2 Split Twins_UK UKB_AFR UKB_AMR UKB_EAS UKB_EUR UKB_SAS UKHLS VIKING Vis YFS	0.249771	0.192572	0.336637	0.244282	0.416862	581889	581887	577219	420663	0.2743	0.2771	0.2613	0.2592	-0.0016	0.0021	-0.0009	-0.0143	0.001	0.0012	0.0002	0.0035	0.1204	0.08051	4.827e-10	4.653e-05	VEGFC(PoPs,nearest)
IRF2	rs747694985	FALSE			4_185399385_T_TAGAC	4	185399385	PEF		T	TAGAC	0.13	0.13	5.919	3.24e-09	?-???+??????????+-++-?	ALSPAC ARIC_AA B58C EPIC FinnTwin hunt LBC1936 orcades Raine RS1 RS2 RS3 SHIP-1 SHIP-TREND-0 SHIP-TREND-0_B2 Split UKB_AFR UKB_AMR UKB_EAS UKB_EUR UKB_SAS VIKING	0.129505	0.188369	0.0612219	0.240713	0.0943587	464518	464518	464518	365467	0.1266	0.1248	0.1309	0.1312	0.004	0.0033	0.0005	0.0297	0.0016	0.0019	0.0002	0.0052	0.01476	0.08142	0.02758	8.849e-09	IRF2(PoPs,nearest)
SLC9A3	rs10475282	FALSE			5_523995_A_G	5	523995	PEF		A	G	0.268	0.268	-6.74	1.58e-11	----+--+---+------+-++	ALSPAC ARIC_AA B58C EPIC FinnTwin hunt LBC1936 orcades Raine RS1 RS2 RS3 SHIP-1 SHIP-TREND-0 SHIP-TREND-0_B2 Split UKB_AFR UKB_AMR UKB_EAS UKB_EUR UKB_SAS VIKING	0.266449	0.348727	0.352716	0.299052	0.441325	581800	581798	577130	421045	0.2982	0.3	0.2777	0.2664	-0.0055	-0.0041	-0.0009	-0.0222	0.001	0.0012	0.0002	0.0035	8.345e-08	0.0007474	1.946e-08	2.335e-10	SLC9A3(eQTL,nearest), AHRR(eQTL), C5orf55(eQTL), CEP72(eQTL), CTD-2228K2.7(eQTL), CTD-2589H19.4(eQTL), CTD-2589H19.6(eQTL), EXOC3(PoPs), NKD2(WES)
TPPP	rs4957082	TRUE	rs11739847	30804560	5_658160_G_T	5	658160	FEV1	FEV1,FVC,FF	T	G	0.191	0.191	-7.599	2.99e-14	-+?---+-?---+?-+-??--+-+--?-+-?----+-----+----++-?	ALHS ALSPAC ARIC_AA ARIC_EA B58C BHS CHSAA CHSEA CKB EPIC EXCEED FHS FinnTwin GS20K H2000 HCHS hunt KORA_F4 KORA_S3 Korcula LBC1936 MESA_AFA_new MESA_CAU_new MESA_HIS_new NEO NFBC66 NFBC86 orcades PIVUS QBB Raine RS1 RS2 RS3 SAPALDIA_Edinburgh SAPALDIA_Gabriel SHIP-1 SHIP-TREND-0 SHIP-TREND-0_B2 Split Twins_UK UKB_AFR UKB_AMR UKB_EAS UKB_EUR UKB_SAS UKHLS VIKING Vis YFS	0.200147	0.0150271	0.0180595	0.14421	0.149229	474662	474640	469992	417012	0.1946	0.1944	0.1955	0.195	-0.0091	-0.0075	-0.0011	-0.0149	0.0013	0.0015	0.0002	0.0039	2.558e-12	1.055e-06	7.452e-10	0.0001238	CEP72(eQTL), CTD-2228K2.7(eQTL), CTD-2589H19.4(eQTL), CTD-2589H19.6(eQTL), EXOC3(PoPs), NKD2(WES), SLC9A3(eQTL), TPPP(nearest)
CDH6	rs1732925	FALSE			5_30912314_A_G	5	30912314	FEV1/FVC		A	G	0.313	0.313	7.925	2.28e-15	+--++++++++++-++++++--+-++++-+-++++-++--++-+++-+++	ALHS ALSPAC ARIC_AA ARIC_EA B58C BHS CHSAA CHSEA CKB EPIC EXCEED FHS FinnTwin GS20K H2000 HCHS hunt KORA_F4 KORA_S3 Korcula LBC1936 MESA_AFA_new MESA_CAU_new MESA_HIS_new NEO NFBC66 NFBC86 orcades PIVUS QBB Raine RS1 RS2 RS3 SAPALDIA_Edinburgh SAPALDIA_Gabriel SHIP-1 SHIP-TREND-0 SHIP-TREND-0_B2 Split Twins_UK UKB_AFR UKB_AMR UKB_EAS UKB_EUR UKB_SAS UKHLS VIKING Vis YFS	0.354977	0.196361	0.111142	0.424171	0.301239	581889	581887	577219	421045	0.3315	0.3289	0.3446	0.3477	0.0037	-0.0001	0.0011	0.0182	0.001	0.0012	0.0001	0.0032	0.0002516	0.9054	2.894e-15	1.58e-08	CDH6(nearest), DROSHA(PoPs)
NPR3	rs147664254	FALSE			5_32754453_G_GT	5	32754453	PEF		G	GT	0.815	0.185	6.305	2.89e-10	+?-+?+-	ARIC_AA hunt UKB_AFR UKB_AMR UKB_EAS UKB_EUR UKB_SAS	0.815375	0.727466	0.990393	0.767133	0.888739	420050	420050	420050	336335	0.815	0.8151	0.814	0.8139	0.008	0.01	0.0002	0.0295	0.0016	0.0019	0.0002	0.0046	7.248e-07	1.482e-07	0.3204	1.957e-10	NPR3(PoPs,nearest)
LOC340113	rs55948784	FALSE			5_33099090_A_G	5	33099090	PEF		A	G	0.117	0.117	8.616	6.92e-18	?-???+??????????+++++?	ALSPAC ARIC_AA B58C EPIC FinnTwin hunt LBC1936 orcades Raine RS1 RS2 RS3 SHIP-1 SHIP-TREND-0 SHIP-TREND-0_B2 Split UKB_AFR UKB_AMR UKB_EAS UKB_EUR UKB_SAS VIKING	0.116254	0.139247	0.0210233	0.137905	0.197527	452972	452972	452972	365467	0.1114	0.1108	0.1159	0.1175	0.0017	-0.0027	0.0011	0.0448	0.0018	0.0021	0.0002	0.0054	0.3502	0.2056	5.513e-06	8.129e-17	LOC340113(nearest), NPR3(PoPs)
TARS	rs268715	TRUE	rs91731	28166213	5_33351833_A_G	5	33351833	FVC	FEV1,FVC	A	G	0.141	0.141	9.804	1.08e-22	++++++-+++--++++++++--++-+++-+-+-++++++-++-++-++-+	ALHS ALSPAC ARIC_AA ARIC_EA B58C BHS CHSAA CHSEA CKB EPIC EXCEED FHS FinnTwin GS20K H2000 HCHS hunt KORA_F4 KORA_S3 Korcula LBC1936 MESA_AFA_new MESA_CAU_new MESA_HIS_new NEO NFBC66 NFBC86 orcades PIVUS QBB Raine RS1 RS2 RS3 SAPALDIA_Edinburgh SAPALDIA_Gabriel SHIP-1 SHIP-TREND-0 SHIP-TREND-0_B2 Split Twins_UK UKB_AFR UKB_AMR UKB_EAS UKB_EUR UKB_SAS UKHLS VIKING Vis YFS	0.092676	0.141394	0.391422	0.087989	0.093239	581889	581887	577219	421045	0.2196	0.2317	0.1539	0.1059	0.01	0.0133	-0.0002	0.0074	0.0014	0.0016	0.0002	0.0052	1.127e-13	8.42e-18	0.4156	0.1596	ADAMTS12(PoPs), TARS(nearest)
RAI14	rs12189242	FALSE			5_34627666_A_C	5	34627666	FEV1/FVC		A	C	0.212	0.212	7.145	9e-13	++++++-+-+-+-+++++--+++-+-+++-++-+++--+++++++-++--	ALHS ALSPAC ARIC_AA ARIC_EA B58C BHS CHSAA CHSEA CKB EPIC EXCEED FHS FinnTwin GS20K H2000 HCHS hunt KORA_F4 KORA_S3 Korcula LBC1936 MESA_AFA_new MESA_CAU_new MESA_HIS_new NEO NFBC66 NFBC86 orcades PIVUS QBB Raine RS1 RS2 RS3 SAPALDIA_Edinburgh SAPALDIA_Gabriel SHIP-1 SHIP-TREND-0 SHIP-TREND-0_B2 Split Twins_UK UKB_AFR UKB_AMR UKB_EAS UKB_EUR UKB_SAS UKHLS VIKING Vis YFS	0.248038	0.114069	0.033302	0.270339	0.145456	581889	581887	577219	421045	0.238	0.2369	0.2425	0.2434	0.0021	-0.003	0.0012	0.0091	0.0011	0.0014	0.0002	0.0036	0.06213	0.02744	6.926e-14	0.0101	RAI14(PoPs,nearest), DNAJC21(rare_disease)
C5orf28	rs112126001	TRUE	rs79904209	31911640	5_43473543_A_T	5	43473543	FEV1	FEV1,FVC,FF	A	T	0.904	0.096	9.511	1.89e-21	++-+++-+?++++++++-+++--+-++-+---++-+++---?+--+++	ALHS ALSPAC ARIC_AA ARIC_EA B58C BHS CHSAA CHSEA CKB EPIC EXCEED FHS FinnTwin GS20K H2000 HCHS hunt KORA_F4 KORA_S3 Korcula LBC1936 MESA_AFA_new MESA_CAU_new MESA_HIS_new NEO NFBC66 NFBC86 orcades PIVUS Raine RS1 RS2 RS3 SAPALDIA_Edinburgh SAPALDIA_Gabriel SHIP-1 SHIP-TREND-0 SHIP-TREND-0_B2 Split Twins_UK UKB_AFR UKB_EAS UKB_EUR UKB_SAS UKHLS VIKING Vis YFS	0.905423	0.994653	0.999298	0.951348	0.960131	496567	496565	491897	419481	0.9012	0.9008	0.9013	0.9057	0.0147	0.01	0.0019	0.0153	0.0017	0.0021	0.0002	0.0053	2.408e-17	1.237e-06	1.262e-15	0.00383	C5orf28(nearest), HMGCS1(PoPs)
PAIP1	rs72758686	FALSE			5_43551081_A_G	5	43551081	PEF		A	G	0.0644	0.0644	6.237	4.46e-10	+?+-++-++++++++-++-+++	ALSPAC ARIC_AA B58C EPIC FinnTwin hunt LBC1936 orcades Raine RS1 RS2 RS3 SHIP-1 SHIP-TREND-0 SHIP-TREND-0_B2 Split UKB_AFR UKB_AMR UKB_EAS UKB_EUR UKB_SAS VIKING	0.0650526	0.00544121	0.0236573	0.0630808	0.0749415	579048	579046	574378	418225	0.062	0.0615	0.0636	0.0642	0.0129	0.0118	0.0011	0.0386	0.002	0.0024	0.0003	0.0063	1.269e-10	5.567e-07	8.111e-05	8.023e-10	NNT(PoPs), PAIP1(nearest)
FGF10	rs1448037	TRUE	rs1448044	30175238	5_44352344_C_T	5	44352344	FVC	FEV1,FVC	T	C	0.308	0.308	11.019	3.11e-28	-++++-++++++-+++++++++--+-+--++--++-+-++-+++++++++	ALHS ALSPAC ARIC_AA ARIC_EA B58C BHS CHSAA CHSEA CKB EPIC EXCEED FHS FinnTwin GS20K H2000 HCHS hunt KORA_F4 KORA_S3 Korcula LBC1936 MESA_AFA_new MESA_CAU_new MESA_HIS_new NEO NFBC66 NFBC86 orcades PIVUS QBB Raine RS1 RS2 RS3 SAPALDIA_Edinburgh SAPALDIA_Gabriel SHIP-1 SHIP-TREND-0 SHIP-TREND-0_B2 Split Twins_UK UKB_AFR UKB_AMR UKB_EAS UKB_EUR UKB_SAS UKHLS VIKING Vis YFS	0.30466	0.348474	0.296355	0.298249	0.279274	581889	581887	577219	421045	0.3087	0.3086	0.3107	0.3185	0.0099	0.0123	-0.0001	0.011	0.001	0.0011	0.0001	0.0033	2.609e-24	5.783e-27	0.6068	0.0008496	FGF10(PoPs,nearest)
ISL1	rs10041288	FALSE			5_50810047_A_C	5	50810047	PEF		A	C	0.604	0.396	-6.885	5.77e-12	-+-+---+----+-----+---	ALSPAC ARIC_AA B58C EPIC FinnTwin hunt LBC1936 orcades Raine RS1 RS2 RS3 SHIP-1 SHIP-TREND-0 SHIP-TREND-0_B2 Split UKB_AFR UKB_AMR UKB_EAS UKB_EUR UKB_SAS VIKING	0.601123	0.86213	0.324832	0.670426	0.598451	581884	581882	577214	421045	0.553	0.5493	0.5879	0.5959	-0.0016	-0.0022	0.0001	-0.0197	0.0009	0.0011	0.0001	0.0031	0.08666	0.05051	0.4522	3.652e-10	ISL1(PoPs,nearest)
PELO	5:51978913_TTC_T	FALSE			5_51978913_T_TTC	5	51978913	PEF		T	TTC	0.267	0.267	6.829	8.53e-12	???????????????????+??	ALSPAC ARIC_AA B58C EPIC FinnTwin hunt LBC1936 orcades Raine RS1 RS2 RS3 SHIP-1 SHIP-TREND-0 SHIP-TREND-0_B2 Split UKB_AFR UKB_AMR UKB_EAS UKB_EUR UKB_SAS VIKING	0.266918	0.456511	0.0566408	0.312862	0.164004	333515	333515	333515	333515	0.2688	0.2692	0.269	0.2684	0.0053	0.005	0.0005	0.0283	0.0014	0.0017	0.0002	0.0041	0.0002205	0.003262	0.006646	6.087e-12	ITGA1(PoPs), PELO(nearest)
ITGA1	rs12522114	TRUE	rs1551943	28166213	5_52187038_A_C	5	52187038	FEV1/FVC	PEF,FEV1,FF	A	C	0.258	0.258	-14.377	7.24e-47	----+++------------+--+-+-------+--+----+------+--	ALHS ALSPAC ARIC_AA ARIC_EA B58C BHS CHSAA CHSEA CKB EPIC EXCEED FHS FinnTwin GS20K H2000 HCHS hunt KORA_F4 KORA_S3 Korcula LBC1936 MESA_AFA_new MESA_CAU_new MESA_HIS_new NEO NFBC66 NFBC86 orcades PIVUS QBB Raine RS1 RS2 RS3 SAPALDIA_Edinburgh SAPALDIA_Gabriel SHIP-1 SHIP-TREND-0 SHIP-TREND-0_B2 Split Twins_UK UKB_AFR UKB_AMR UKB_EAS UKB_EUR UKB_SAS UKHLS VIKING Vis YFS	0.264926	0.18101	0.238437	0.320424	0.35106	581884	581882	577214	421045	0.2582	0.2573	0.2621	0.2625	-0.0059	0.0015	-0.0022	-0.0269	0.001	0.0012	0.0002	0.0035	1.663e-08	0.2272	2.234e-48	8.834e-15	ITGA1(PoPs,nearest), CTD-2366F13.1(eQTL), ITGA2(eQTL)
ITGA1	rs4074793	FALSE			5_52193125_A_G	5	52193125	FEV1/FVC		A	G	0.926	0.074	-7.481	7.38e-14	++----+-------+------+++-+-+-++----++-------+--++	ALHS ALSPAC ARIC_AA ARIC_EA B58C BHS CHSAA CHSEA CKB EPIC EXCEED FHS FinnTwin GS20K H2000 HCHS hunt KORA_F4 KORA_S3 Korcula LBC1936 MESA_AFA_new MESA_CAU_new MESA_HIS_new NEO NFBC66 NFBC86 orcades PIVUS Raine RS1 RS2 RS3 SAPALDIA_Edinburgh SAPALDIA_Gabriel SHIP-1 SHIP-TREND-0 SHIP-TREND-0_B2 Split Twins_UK UKB_AFR UKB_AMR UKB_EAS UKB_EUR UKB_SAS UKHLS VIKING Vis YFS	0.924943	0.992548	0.932545	0.896355	0.940398	570343	570341	565673	421045	0.9246	0.9248	0.9239	0.9242	-0.01	-0.0022	-0.0024	-0.0308	0.0017	0.002	0.0003	0.0058	9.385e-09	0.2774	3.57e-21	9.606e-08	ITGA1(eQTL,PoPs,nearest)
ITGA1	rs2279586	FALSE			5_52214848_A_C	5	52214848	FEV1/FVC		A	C	0.0725	0.0725	6.944	3.8e-12	++++++++++-++++++++++--++++-+-++--+-+-+-+-+++++-+	ALHS ALSPAC ARIC_AA ARIC_EA B58C BHS CHSAA CHSEA CKB EPIC EXCEED FHS FinnTwin GS20K H2000 HCHS hunt KORA_F4 KORA_S3 Korcula LBC1936 MESA_AFA_new MESA_CAU_new MESA_HIS_new NEO NFBC66 NFBC86 orcades PIVUS Raine RS1 RS2 RS3 SAPALDIA_Edinburgh SAPALDIA_Gabriel SHIP-1 SHIP-TREND-0 SHIP-TREND-0_B2 Split Twins_UK UKB_AFR UKB_AMR UKB_EAS UKB_EUR UKB_SAS UKHLS VIKING Vis YFS	0.0580333	0.0152628	0.161132	0.0764972	0.0577293	581889	581887	577219	421045	0.104	0.1068	0.0829	0.068	0.0036	0.0015	0.0008	0.0099	0.0017	0.0019	0.0003	0.0064	0.03489	0.4355	0.003307	0.1214	ITGA1(PoPs,nearest)
ITGA2	rs34865297	FALSE			5_52271231_A_G	5	52271231	FEV1	FEV1,FVC,FF	A	G	0.208	0.208	9.424	4.35e-21	++?++--+?+++-+++++++++++++++-?++----+-+--++++++--+	ALHS ALSPAC ARIC_AA ARIC_EA B58C BHS CHSAA CHSEA CKB EPIC EXCEED FHS FinnTwin GS20K H2000 HCHS hunt KORA_F4 KORA_S3 Korcula LBC1936 MESA_AFA_new MESA_CAU_new MESA_HIS_new NEO NFBC66 NFBC86 orcades PIVUS QBB Raine RS1 RS2 RS3 SAPALDIA_Edinburgh SAPALDIA_Gabriel SHIP-1 SHIP-TREND-0 SHIP-TREND-0_B2 Split Twins_UK UKB_AFR UKB_AMR UKB_EAS UKB_EUR UKB_SAS UKHLS VIKING Vis YFS	0.20878	0.0903134	0.121028	0.304416	0.10256	483802	483800	479132	418225	0.2093	0.2093	0.209	0.2056	0.0115	0.0105	0.0009	0.0185	0.0012	0.0015	0.0002	0.0038	3.995e-20	8.835e-13	7.145e-08	9.751e-07	ITGA1(PoPs), ITGA2(nearest), LOC257396(eQTL)
ARL15	rs2441026	TRUE	rs2441026	28166213	5_53444498_C_T	5	53444498	FVC	FEV1,FVC	T	C	0.419	0.419	7.964	1.67e-15	+-+++-++++++++-+++-+++--++--+++-+++++-+-+-+++-+++-	ALHS ALSPAC ARIC_AA ARIC_EA B58C BHS CHSAA CHSEA CKB EPIC EXCEED FHS FinnTwin GS20K H2000 HCHS hunt KORA_F4 KORA_S3 Korcula LBC1936 MESA_AFA_new MESA_CAU_new MESA_HIS_new NEO NFBC66 NFBC86 orcades PIVUS QBB Raine RS1 RS2 RS3 SAPALDIA_Edinburgh SAPALDIA_Gabriel SHIP-1 SHIP-TREND-0 SHIP-TREND-0_B2 Split Twins_UK UKB_AFR UKB_AMR UKB_EAS UKB_EUR UKB_SAS UKHLS VIKING Vis YFS	0.46101	0.373548	0.136565	0.480531	0.375813	581889	581887	577219	421045	0.4288	0.4247	0.451	0.4545	0.0066	0.0085	0.0002	0.0087	0.0009	0.0011	0.0001	0.0031	2.494e-12	2.291e-14	0.2039	0.004573	ARL15(PoPs,nearest), NDUFS4(rare_disease)
KIF2A	rs4700001	FALSE			5_61412926_C_T	5	61412926	FVC		T	C	0.363	0.363	6.036	1.58e-09	+++-+--+-+-+++?++++--+++-+-++-++-++++-++-+-++++-++	ALHS ALSPAC ARIC_AA ARIC_EA B58C BHS CHSAA CHSEA CKB EPIC EXCEED FHS FinnTwin GS20K H2000 HCHS hunt KORA_F4 KORA_S3 Korcula LBC1936 MESA_AFA_new MESA_CAU_new MESA_HIS_new NEO NFBC66 NFBC86 orcades PIVUS QBB Raine RS1 RS2 RS3 SAPALDIA_Edinburgh SAPALDIA_Gabriel SHIP-1 SHIP-TREND-0 SHIP-TREND-0_B2 Split Twins_UK UKB_AFR UKB_AMR UKB_EAS UKB_EUR UKB_SAS UKHLS VIKING Vis YFS	0.38194	0.0707687	0.297783	0.402471	0.405797	578098	578096	573428	421045	0.3637	0.3625	0.3757	0.3768	0.005	0.0062	0	0.011	0.0009	0.0011	0.0001	0.0032	1.305e-07	2.346e-08	0.9185	0.0005164	KIF2A(eQTL,PoPs,nearest), DIMT1(eQTL), IPO11(eQTL)
CWC27	rs1309572	FALSE			5_64278005_A_G	5	64278005	FVC		A	G	0.578	0.422	-6.348	2.18e-10	+-+-------+++----+--+--++-++--+---+++-+-+-+--+-++-	ALHS ALSPAC ARIC_AA ARIC_EA B58C BHS CHSAA CHSEA CKB EPIC EXCEED FHS FinnTwin GS20K H2000 HCHS hunt KORA_F4 KORA_S3 Korcula LBC1936 MESA_AFA_new MESA_CAU_new MESA_HIS_new NEO NFBC66 NFBC86 orcades PIVUS QBB Raine RS1 RS2 RS3 SAPALDIA_Edinburgh SAPALDIA_Gabriel SHIP-1 SHIP-TREND-0 SHIP-TREND-0_B2 Split Twins_UK UKB_AFR UKB_AMR UKB_EAS UKB_EUR UKB_SAS UKHLS VIKING Vis YFS	0.544844	0.769486	0.703505	0.565007	0.585232	581889	581887	577219	421045	0.5806	0.5823	0.5618	0.555	-0.0046	-0.0068	0.0002	0.0011	0.0009	0.0011	0.0001	0.0031	7.141e-07	3.338e-10	0.1859	0.7094	ADAMTS6(PoPs), CWC27(nearest)
TNPO1	rs34651	FALSE			5_72144005_C_T	5	72144005	PEF		T	C	0.919	0.081	6.173	6.71e-10	+----++++++---++--+++	ALSPAC ARIC_AA B58C EPIC FinnTwin hunt LBC1936 orcades Raine RS1 RS2 RS3 SHIP-1 SHIP-TREND-0 SHIP-TREND-0_B2 Split UKB_AFR UKB_AMR UKB_EUR UKB_SAS VIKING	0.918733	0.969278	0.863051	0.931457	0.886483	569092	569090	564422	408267	0.9068	0.9053	0.9144	0.9085	0.0071	0.0045	0.0012	0.0335	0.0016	0.0019	0.0002	0.0057	1.461e-05	0.01686	1.884e-06	4.755e-09	FCHO2(PoPs), TNPO1(nearest)
TMEM174	rs6452929	FALSE			5_72581431_A_T	5	72581431	PEF		A	T	0.0785	0.0785	6.204	5.5e-10	+-++++-++++----+++-+++	ALSPAC ARIC_AA B58C EPIC FinnTwin hunt LBC1936 orcades Raine RS1 RS2 RS3 SHIP-1 SHIP-TREND-0 SHIP-TREND-0_B2 Split UKB_AFR UKB_AMR UKB_EAS UKB_EUR UKB_SAS VIKING	0.079943	0.017833	0.001651	0.101114	0.017941	580201	580199	575531	419481	0.08	0.0798	0.0797	0.0901	0.0053	0.0011	0.0012	0.0366	0.0019	0.0022	0.0003	0.0057	0.005149	0.6258	1.352e-06	1.907e-10	FCHO2(PoPs), TMEM174(nearest)
PDE8B	rs35689253	FALSE			5_76597887_A_G	5	76597887	FEV1		A	G	0.548	0.452	6.238	4.43e-10	++++++--+++-+++++++-++++++--+-+-++++-++++++-++--	ALHS ALSPAC ARIC_AA ARIC_EA B58C BHS CHSAA CHSEA CKB EPIC EXCEED FHS FinnTwin GS20K H2000 HCHS hunt KORA_F4 KORA_S3 Korcula LBC1936 MESA_AFA_new MESA_CAU_new MESA_HIS_new NEO NFBC66 NFBC86 orcades PIVUS Raine RS1 RS2 RS3 SAPALDIA_Edinburgh SAPALDIA_Gabriel SHIP-1 SHIP-TREND-0 SHIP-TREND-0_B2 Split Twins_UK UKB_AFR UKB_EAS UKB_EUR UKB_SAS UKHLS VIKING Vis YFS	0.494263	0.738969	0.876046	0.506723	0.639424	581889	581887	577219	421045	0.5376	0.5411	0.5159	0.4984	0.0044	0.0042	0.0004	0.0029	0.001	0.0011	0.0001	0.0031	4.603e-06	0.000195	0.006632	0.3358	PDE8B(nearest), ZBED3(PoPs)
OTP	rs13361688	FALSE			5_76866655_A_G	5	76866655	FEV1		A	G	0.272	0.272	-6.22	4.99e-10	+-+--+-+----------+++-+---+++-++-+-----+-?----++-	ALHS ALSPAC ARIC_AA ARIC_EA B58C BHS CHSAA CHSEA CKB EPIC EXCEED FHS FinnTwin GS20K H2000 HCHS hunt KORA_F4 KORA_S3 Korcula LBC1936 MESA_AFA_new MESA_CAU_new MESA_HIS_new NEO NFBC66 NFBC86 orcades PIVUS Raine RS1 RS2 RS3 SAPALDIA_Edinburgh SAPALDIA_Gabriel SHIP-1 SHIP-TREND-0 SHIP-TREND-0_B2 Split Twins_UK UKB_AFR UKB_AMR UKB_EAS UKB_EUR UKB_SAS UKHLS VIKING Vis YFS	0.24621	0.527179	0.421493	0.144246	0.310596	581889	581887	577219	421045	0.2945	0.2965	0.2706	0.2539	-0.0063	-0.0068	-0.0003	-0.0116	0.001	0.0012	0.0002	0.0035	3.489e-10	1.066e-08	0.02908	0.001014	AP3B1(rare_disease), OTP(nearest), TBCA(PoPs)
LOC101929154	rs7700998	FALSE			5_77147787_A_G	5	77147787	FVC		A	G	0.444	0.444	-6.295	3.08e-10	-----+-+-------+-+-+++-+-+++-+++-++-++------++--+	ALHS ALSPAC ARIC_AA ARIC_EA B58C BHS CHSAA CHSEA CKB EPIC EXCEED FHS FinnTwin GS20K H2000 HCHS hunt KORA_F4 KORA_S3 Korcula LBC1936 MESA_AFA_new MESA_CAU_new MESA_HIS_new NEO NFBC66 NFBC86 orcades PIVUS Raine RS1 RS2 RS3 SAPALDIA_Edinburgh SAPALDIA_Gabriel SHIP-1 SHIP-TREND-0 SHIP-TREND-0_B2 Split Twins_UK UKB_AFR UKB_AMR UKB_EAS UKB_EUR UKB_SAS UKHLS VIKING Vis YFS	0.456176	0.207318	0.391118	0.352317	0.357693	581887	581885	577217	421045	0.4396	0.4385	0.4465	0.4572	-0.0046	-0.0068	0.0003	-0.0054	0.0009	0.0011	0.0001	0.0031	4.842e-07	2.581e-10	0.04489	0.07963	AP3B1(rare_disease,PoPs), LOC101929154(nearest), TBCA(eQTL)
AP3B1	rs55769512	TRUE	rs72776440	30061609	5_77439707_C_T	5	77439707	FVC	FEV1,FVC	T	C	0.797	0.203	8.93	4.27e-19	+++++++-+-++-++++--+++-++++++?-++++++++--+-+++++++	ALHS ALSPAC ARIC_AA ARIC_EA B58C BHS CHSAA CHSEA CKB EPIC EXCEED FHS FinnTwin GS20K H2000 HCHS hunt KORA_F4 KORA_S3 Korcula LBC1936 MESA_AFA_new MESA_CAU_new MESA_HIS_new NEO NFBC66 NFBC86 orcades PIVUS QBB Raine RS1 RS2 RS3 SAPALDIA_Edinburgh SAPALDIA_Gabriel SHIP-1 SHIP-TREND-0 SHIP-TREND-0_B2 Split Twins_UK UKB_AFR UKB_AMR UKB_EAS UKB_EUR UKB_SAS UKHLS VIKING Vis YFS	0.764688	0.916979	0.942315	0.824097	0.877561	570343	570341	565673	421045	0.7792	0.7803	0.7722	0.7693	0.0081	0.0125	-0.0004	0.0065	0.0012	0.0014	0.0002	0.0036	3.586e-12	4.928e-20	0.009678	0.07263	AP3B1(eQTL,rare_disease,PoPs,nearest)
BHMT	rs2364596	FALSE			5_78434291_C_T	5	78434291	FEV1	FEV1,FVC	T	C	0.385	0.385	6.233	4.58e-10	++------++-+-++++-+-++--+-++++++-+++--+++++++++-	ALHS ALSPAC ARIC_AA ARIC_EA B58C BHS CHSAA CHSEA CKB EPIC EXCEED FHS FinnTwin GS20K H2000 HCHS hunt KORA_F4 KORA_S3 Korcula LBC1936 MESA_AFA_new MESA_CAU_new MESA_HIS_new NEO NFBC66 NFBC86 orcades PIVUS Raine RS1 RS2 RS3 SAPALDIA_Edinburgh SAPALDIA_Gabriel SHIP-1 SHIP-TREND-0 SHIP-TREND-0_B2 Split Twins_UK UKB_AFR UKB_EAS UKB_EUR UKB_SAS UKHLS VIKING Vis YFS	0.370191	0.251834	0.490095	0.390462	0.523511	581889	581887	577219	421045	0.3964	0.399	0.3825	0.3691	0.0051	0.0059	0.0002	0.0173	0.0009	0.0011	0.0001	0.0032	3.194e-08	5.077e-08	0.1228	4.395e-08	ARSB(PoPs), BHMT(nearest), HOMER1(WES)
JMY	rs62366070	FALSE			5_78518181_A_G	5	78518181	PEF		A	G	0.26	0.26	-6.035	1.59e-09	-+--+----++--+++--0--+	ALSPAC ARIC_AA B58C EPIC FinnTwin hunt LBC1936 orcades Raine RS1 RS2 RS3 SHIP-1 SHIP-TREND-0 SHIP-TREND-0_B2 Split UKB_AFR UKB_AMR UKB_EAS UKB_EUR UKB_SAS VIKING	0.268272	0.0428088	0.0752545	0.134746	0.142454	581873	581871	577203	421045	0.2458	0.244	0.2571	0.2595	-0.0054	-0.0054	-0.0004	-0.0206	0.0011	0.0013	0.0002	0.0035	1.386e-06	3.948e-05	0.004086	4.834e-09	ARSB(PoPs), HOMER1(WES), JMY(nearest), LHFPL2(eQTL), SCAMP1(eQTL)
HAPLN1	rs974023	FALSE			5_83014848_C_T	5	83014848	PEF		T	C	0.225	0.225	16.837	1.3e-63	+++++++++++++-+-++++++	ALSPAC ARIC_AA B58C EPIC FinnTwin hunt LBC1936 orcades Raine RS1 RS2 RS3 SHIP-1 SHIP-TREND-0 SHIP-TREND-0_B2 Split UKB_AFR UKB_AMR UKB_EAS UKB_EUR UKB_SAS VIKING	0.221179	0.248824	0.156742	0.276137	0.407839	581887	581885	577217	421045	0.2234	0.2223	0.2282	0.2346	0.0013	-0.0008	0.0007	0.06	0.0011	0.0013	0.0002	0.0036	0.2149	0.5235	3.29e-05	8.819e-61	HAPLN1(eQTL,nearest), VCAN(PoPs)
NR2F1-AS1	rs13177386	FALSE			5_92443605_A_C	5	92443605	PEF	PEF,FEV1,FVC	A	C	0.533	0.467	-9.45	3.39e-21	------+--------+----+-	ALSPAC ARIC_AA B58C EPIC FinnTwin hunt LBC1936 orcades Raine RS1 RS2 RS3 SHIP-1 SHIP-TREND-0 SHIP-TREND-0_B2 Split UKB_AFR UKB_AMR UKB_EAS UKB_EUR UKB_SAS VIKING	0.534902	0.473499	0.307911	0.693732	0.449184	581889	581887	577219	421045	0.4919	0.4887	0.5182	0.5356	-0.0057	-0.0061	-0.0002	-0.0286	0.0009	0.0011	0.0001	0.0031	4.951e-10	1.585e-08	0.0646	9.674e-21	NR2F1(eQTL,PoPs), NR2F1-AS1(eQTL,nearest)
SPATA9	rs212996	TRUE	rs153916	21946350	5_95031091_C_T	5	95031091	FEV1/FVC		T	C	0.593	0.407	-13.264	3.74e-40	-+----+--+-+---+---+---+-----?+------+++-------++-	ALHS ALSPAC ARIC_AA ARIC_EA B58C BHS CHSAA CHSEA CKB EPIC EXCEED FHS FinnTwin GS20K H2000 HCHS hunt KORA_F4 KORA_S3 Korcula LBC1936 MESA_AFA_new MESA_CAU_new MESA_HIS_new NEO NFBC66 NFBC86 orcades PIVUS QBB Raine RS1 RS2 RS3 SAPALDIA_Edinburgh SAPALDIA_Gabriel SHIP-1 SHIP-TREND-0 SHIP-TREND-0_B2 Split Twins_UK UKB_AFR UKB_AMR UKB_EAS UKB_EUR UKB_SAS UKHLS VIKING Vis YFS	0.553461	0.592176	0.769865	0.484746	0.620334	570343	570341	565673	421045	0.587	0.5905	0.5648	0.5477	-0.0021	0.0044	-0.0017	-0.0098	0.0009	0.0011	0.0001	0.0031	0.02885	7.277e-05	4.486e-37	0.001361	RHOBTB3(eQTL,PoPs), RFESD(eQTL), SPATA9(nearest), TTC37(rare_disease)
RGMB-AS1	rs2249797	FALSE			5_98107341_C_T	5	98107341	FEV1		T	C	0.539	0.461	7.328	2.34e-13	++-+++-++-+++++++---+-+++++++?+++++++-+++++-++++++	ALHS ALSPAC ARIC_AA ARIC_EA B58C BHS CHSAA CHSEA CKB EPIC EXCEED FHS FinnTwin GS20K H2000 HCHS hunt KORA_F4 KORA_S3 Korcula LBC1936 MESA_AFA_new MESA_CAU_new MESA_HIS_new NEO NFBC66 NFBC86 orcades PIVUS QBB Raine RS1 RS2 RS3 SAPALDIA_Edinburgh SAPALDIA_Gabriel SHIP-1 SHIP-TREND-0 SHIP-TREND-0_B2 Split Twins_UK UKB_AFR UKB_AMR UKB_EAS UKB_EUR UKB_SAS UKHLS VIKING Vis YFS	0.519029	0.0395947	0.671739	0.372015	0.395617	570343	570341	565673	421045	0.546	0.5502	0.5274	0.5111	0.0071	0.0062	0.0008	0.0148	0.0009	0.0011	0.0001	0.0031	2.612e-14	1.025e-08	1.801e-08	1.683e-06	RGMB-AS1(eQTL,nearest), CHD1(PoPs), RGMB(eQTL)
LOC100289230	rs6865618	FALSE			5_98381994_C_G	5	98381994	FEV1/FVC		C	G	0.676	0.324	7.503	6.25e-14	+-?+++-+?++++++++-+-+-+++-+++-++++-++-++-+-++++---	ALHS ALSPAC ARIC_AA ARIC_EA B58C BHS CHSAA CHSEA CKB EPIC EXCEED FHS FinnTwin GS20K H2000 HCHS hunt KORA_F4 KORA_S3 Korcula LBC1936 MESA_AFA_new MESA_CAU_new MESA_HIS_new NEO NFBC66 NFBC86 orcades PIVUS QBB Raine RS1 RS2 RS3 SAPALDIA_Edinburgh SAPALDIA_Gabriel SHIP-1 SHIP-TREND-0 SHIP-TREND-0_B2 Split Twins_UK UKB_AFR UKB_AMR UKB_EAS UKB_EUR UKB_SAS UKHLS VIKING Vis YFS	0.668604	0.487328	0.939794	0.618371	0.755876	495347	495345	490677	418225	0.6744	0.6748	0.6731	0.6749	0.0061	0.0035	0.001	0.0157	0.0011	0.0013	0.0001	0.0033	1.205e-08	0.006015	1.375e-12	1.478e-06	CHD1(PoPs), LOC100289230(nearest), RGMB(eQTL), RGMB-AS1(eQTL)
TNFAIP8	rs1509141	FALSE			5_118692218_C_G	5	118692218	PEF	PEF,FVC	C	G	0.705	0.295	9.438	3.8e-21	+++++++-++-+-++---++++	ALSPAC ARIC_AA B58C EPIC FinnTwin hunt LBC1936 orcades Raine RS1 RS2 RS3 SHIP-1 SHIP-TREND-0 SHIP-TREND-0_B2 Split UKB_AFR UKB_AMR UKB_EAS UKB_EUR UKB_SAS VIKING	0.699764	0.972026	0.591413	0.69701	0.757603	581887	581885	577217	421045	0.6795	0.6768	0.6912	0.6923	0.004	0.006	-0.0003	0.0327	0.001	0.0011	0.0001	0.0033	4.5e-05	1.323e-07	0.06291	1.659e-22	TNFAIP8(PoPs,nearest)
PRR16	rs4895231	FALSE			5_119388659_C_G	5	119388659	FEV1/FVC		C	G	0.432	0.432	7.056	1.71e-12	--++++-+++++-++++--+++++++-++++----++--++++-++-+	ALHS ALSPAC ARIC_AA ARIC_EA B58C BHS CHSAA CHSEA CKB EPIC EXCEED FHS FinnTwin GS20K HCHS hunt KORA_F4 KORA_S3 Korcula LBC1936 MESA_AFA_new MESA_CAU_new MESA_HIS_new NEO NFBC66 NFBC86 orcades PIVUS Raine RS1 RS2 RS3 SAPALDIA_Edinburgh SAPALDIA_Gabriel SHIP-1 SHIP-TREND-0 SHIP-TREND-0_B2 Split Twins_UK UKB_AFR UKB_AMR UKB_EAS UKB_EUR UKB_SAS UKHLS VIKING Vis YFS	0.464376	0.327793	0.198509	0.418126	0.245708	581858	581856	577188	421045	0.4324	0.4293	0.4524	0.4651	0.0028	-0.0005	0.001	0.0042	0.001	0.0011	0.0001	0.0031	0.002821	0.6324	7.601e-13	0.1744	PRR16(eQTL,PoPs,nearest)
PRR16	rs12517895	TRUE	rs1125578	31911640	5_120095548_C_G	5	120095548	FEV1/FVC		C	G	0.415	0.415	-8.726	2.63e-18	--+----------+---+-+-+----+-++---+-+-++-------+++	ALHS ALSPAC ARIC_AA ARIC_EA B58C BHS CHSAA CHSEA CKB EPIC EXCEED FHS FinnTwin GS20K H2000 HCHS hunt KORA_F4 KORA_S3 Korcula LBC1936 MESA_AFA_new MESA_CAU_new MESA_HIS_new NEO NFBC66 NFBC86 orcades PIVUS Raine RS1 RS2 RS3 SAPALDIA_Edinburgh SAPALDIA_Gabriel SHIP-1 SHIP-TREND-0 SHIP-TREND-0_B2 Split Twins_UK UKB_AFR UKB_AMR UKB_EAS UKB_EUR UKB_SAS UKHLS VIKING Vis YFS	0.44226	0.595311	0.216909	0.408388	0.428223	581888	581886	577218	421045	0.4124	0.409	0.4343	0.4488	-0.0012	0.0029	-0.0012	-0.0108	0.0009	0.0011	0.0001	0.0031	0.1873	0.008006	2.358e-18	0.0004444	PRR16(PoPs,nearest)
LOX	rs840467	TRUE	rs10059661	30804560	5_121415899_C_T	5	121415899	FEV1/FVC		T	C	0.183	0.183	11.273	1.78e-29	++-+++++++-+-++++-+++++-++++++++++++-++++-++++++--	ALHS ALSPAC ARIC_AA ARIC_EA B58C BHS CHSAA CHSEA CKB EPIC EXCEED FHS FinnTwin GS20K H2000 HCHS hunt KORA_F4 KORA_S3 Korcula LBC1936 MESA_AFA_new MESA_CAU_new MESA_HIS_new NEO NFBC66 NFBC86 orcades PIVUS QBB Raine RS1 RS2 RS3 SAPALDIA_Edinburgh SAPALDIA_Gabriel SHIP-1 SHIP-TREND-0 SHIP-TREND-0_B2 Split Twins_UK UKB_AFR UKB_AMR UKB_EAS UKB_EUR UKB_SAS UKHLS VIKING Vis YFS	0.188178	0.030563	0.143061	0.211848	0.154784	581867	581865	577197	421045	0.184	0.1837	0.1856	0.1951	0.0033	-0.0039	0.0018	0.0088	0.0012	0.0014	0.0002	0.004	0.005377	0.004655	8.794e-27	0.02727	LOX(PoPs,nearest)
LOX	rs41490044	FALSE			5_121416794_A_G	5	121416794	FEV1/FVC		A	G	0.266	0.266	-7.49	6.89e-14	-+---+---+--++?-----+-++---+---+----++-+--+------	ALHS ALSPAC ARIC_AA ARIC_EA B58C BHS CHSAA CHSEA CKB EPIC EXCEED FHS FinnTwin GS20K H2000 HCHS hunt KORA_F4 KORA_S3 Korcula LBC1936 MESA_AFA_new MESA_CAU_new MESA_HIS_new NEO NFBC66 NFBC86 orcades PIVUS Raine RS1 RS2 RS3 SAPALDIA_Edinburgh SAPALDIA_Gabriel SHIP-1 SHIP-TREND-0 SHIP-TREND-0_B2 Split Twins_UK UKB_AFR UKB_AMR UKB_EAS UKB_EUR UKB_SAS UKHLS VIKING Vis YFS	0.290116	0.20874	0.122056	0.187786	0.249285	578097	578095	573427	421045	0.2696	0.2682	0.2813	0.2843	-0.0024	0.0035	-0.0015	-0.0072	0.0011	0.0012	0.0001	0.0034	0.02394	0.005117	5.59e-25	0.03321	LOX(eQTL,PoPs,nearest)
SNX24	rs1993876	FALSE			5_122253602_C_T	5	122253602	FVC	FEV1,FVC	T	C	0.298	0.298	-6.957	3.47e-12	---+-+------+-----++++++-+++-?+-+--+-+---++----++-	ALHS ALSPAC ARIC_AA ARIC_EA B58C BHS CHSAA CHSEA CKB EPIC EXCEED FHS FinnTwin GS20K H2000 HCHS hunt KORA_F4 KORA_S3 Korcula LBC1936 MESA_AFA_new MESA_CAU_new MESA_HIS_new NEO NFBC66 NFBC86 orcades PIVUS QBB Raine RS1 RS2 RS3 SAPALDIA_Edinburgh SAPALDIA_Gabriel SHIP-1 SHIP-TREND-0 SHIP-TREND-0_B2 Split Twins_UK UKB_AFR UKB_AMR UKB_EAS UKB_EUR UKB_SAS UKHLS VIKING Vis YFS	0.339278	0.525482	0.0438218	0.284602	0.159285	570342	570340	565672	421045	0.3269	0.3252	0.3363	0.3384	-0.0065	-0.0081	-0.0001	-0.0076	0.001	0.0012	0.0001	0.0032	4.127e-10	3.901e-11	0.4461	0.0185	CEP120(rare_disease), PRDM6(PoPs), SNX24(nearest)
CEP120	rs566909063	FALSE			5_122755247_C_CAA	5	122755247	FEV1	FEV1,FVC	CAA	C	0.395	0.395	-7.658	1.89e-14	??-?????-????????????????????????????????-----????	ALHS ALSPAC ARIC_AA ARIC_EA B58C BHS CHSAA CHSEA CKB EPIC EXCEED FHS FinnTwin GS20K H2000 HCHS hunt KORA_F4 KORA_S3 Korcula LBC1936 MESA_AFA_new MESA_CAU_new MESA_HIS_new NEO NFBC66 NFBC86 orcades PIVUS QBB Raine RS1 RS2 RS3 SAPALDIA_Edinburgh SAPALDIA_Gabriel SHIP-1 SHIP-TREND-0 SHIP-TREND-0_B2 Split Twins_UK UKB_AFR UKB_AMR UKB_EAS UKB_EUR UKB_SAS UKHLS VIKING Vis YFS	0.39958	0.196505	0.413037	0.291816	0.394091	420050	420050	420050	336335	0.3955	0.3953	0.3962	0.3968	-0.0083	-0.0085	-0.0006	-0.0043	0.0011	0.0013	0.0002	0.0037	6.187e-14	4.224e-11	0.0001136	0.2369	CEP120(rare_disease,nearest), KRT8P33(eQTL), PRDM6(PoPs)
2003-03-01	5:126305819_AC_A	FALSE			5_126305819_A_AC	5	126305819	FEV1/FVC		A	AC	0.463	0.463	-6.132	8.7e-10	???????????-??????????????????????-????	ALHS ALSPAC ARIC_EA B58C BHS CHSEA EPIC EXCEED FHS FinnTwin GS20K H2000 hunt KORA_F4 KORA_S3 Korcula LBC1936 MESA_CAU_new NEO NFBC66 NFBC86 orcades PIVUS Raine RS1 RS2 RS3 SAPALDIA_Edinburgh SAPALDIA_Gabriel SHIP-1 SHIP-TREND-0 SHIP-TREND-0_B2 Split Twins_UK UKB_EUR UKHLS VIKING Vis YFS	0.462141	0.373892	0.655025	0.414709	0.513939	448164	448164	448164	349113	0.5081	0.5114	0.4796	0.4635	-0.0007	0.0023	-0.0009	-0.0046	0.0011	0.0012	0.0001	0.0035	0.5208	0.06283	2.76e-09	0.1935	MARCH3(eQTL,PoPs,nearest), C5orf63(eQTL), ENSG00000283897(eQTL), MEGF10(rare_disease)
MIR4460	rs72663375	TRUE	rs17163397	30804560	5_128753817_C_G	5	128753817	FEV1/FVC	FEV1,FF	C	G	0.122	0.122	8.789	1.5e-18	++?--+++?++++++++-+-+-+++-+-+?+--+++-++++-++++++++	ALHS ALSPAC ARIC_AA ARIC_EA B58C BHS CHSAA CHSEA CKB EPIC EXCEED FHS FinnTwin GS20K H2000 HCHS hunt KORA_F4 KORA_S3 Korcula LBC1936 MESA_AFA_new MESA_CAU_new MESA_HIS_new NEO NFBC66 NFBC86 orcades PIVUS QBB Raine RS1 RS2 RS3 SAPALDIA_Edinburgh SAPALDIA_Gabriel SHIP-1 SHIP-TREND-0 SHIP-TREND-0_B2 Split Twins_UK UKB_AFR UKB_AMR UKB_EAS UKB_EUR UKB_SAS UKHLS VIKING Vis YFS	0.121862	0.126462	0.207962	0.137111	0.193274	483808	483806	479138	418225	0.1224	0.1224	0.1229	0.1206	0.0086	0.004	0.0016	0.0145	0.0015	0.0018	0.0002	0.0047	3.217e-08	0.02972	1.638e-14	0.002017	ADAMTS19(PoPs), MIR4460(nearest)
CHSY3	rs13161173	FALSE			5_129362444_G_T	5	129362444	FVC	FEV1,FVC	T	G	0.324	0.324	-6.764	1.34e-11	-+---+-+-------+-+++--------+++-+-+-++-+-+----	ALHS ALSPAC ARIC_AA ARIC_EA B58C BHS CHSAA CHSEA EPIC EXCEED FHS FinnTwin GS20K HCHS hunt KORA_F4 KORA_S3 Korcula LBC1936 MESA_AFA_new MESA_CAU_new MESA_HIS_new NEO NFBC66 NFBC86 orcades PIVUS Raine RS1 RS2 RS3 SAPALDIA_Edinburgh SAPALDIA_Gabriel SHIP-1 SHIP-TREND-0 SHIP-TREND-0_B2 Split Twins_UK UKB_AFR UKB_AMR UKB_EUR UKB_SAS UKHLS VIKING Vis YFS	0.321399	0.262022	0.313709	0.323092	0.432035	581889	581887	577219	421045	0.3262	0.326	0.3257	0.3209	-0.0042	-0.0053	0.0001	-0.0076	0.001	0.0011	0.0001	0.0033	1.075e-05	2.171e-06	0.4192	0.01954	CHSY3(PoPs,nearest)
P4HA2-AS1	rs3843503	TRUE	rs7713065	28166213	5_131466629_A_T	5	131466629	FVC		A	T	0.371	0.371	-8.279	1.24e-16	--+---+-----+-?----+-+-----++-+-+----------+----+-	ALHS ALSPAC ARIC_AA ARIC_EA B58C BHS CHSAA CHSEA CKB EPIC EXCEED FHS FinnTwin GS20K H2000 HCHS hunt KORA_F4 KORA_S3 Korcula LBC1936 MESA_AFA_new MESA_CAU_new MESA_HIS_new NEO NFBC66 NFBC86 orcades PIVUS QBB Raine RS1 RS2 RS3 SAPALDIA_Edinburgh SAPALDIA_Gabriel SHIP-1 SHIP-TREND-0 SHIP-TREND-0_B2 Split Twins_UK UKB_AFR UKB_AMR UKB_EAS UKB_EUR UKB_SAS UKHLS VIKING Vis YFS	0.452124	0.147523	0.0306003	0.353034	0.138853	578063	578061	573393	421045	0.4348	0.4345	0.4381	0.4388	-0.0057	-0.0108	0.0007	-0.0019	0.001	0.0012	0.0001	0.0031	2.651e-08	6.101e-19	2.186e-06	0.5516	AC034220.3(eQTL), CDC42SE2(eQTL), P4HA2(eQTL), P4HA2-AS1(nearest), PDLIM4(PoPs), SLC22A4(eQTL), SLC22A5(eQTL)
C5orf56	rs4235802	FALSE			5_131782837_A_C	5	131782837	FEV1/FVC		A	C	0.789	0.211	12.137	6.74e-34	++++-++-++-++-++++++-+++-+-+++++-+-++--+++++++++-+	ALHS ALSPAC ARIC_AA ARIC_EA B58C BHS CHSAA CHSEA CKB EPIC EXCEED FHS FinnTwin GS20K H2000 HCHS hunt KORA_F4 KORA_S3 Korcula LBC1936 MESA_AFA_new MESA_CAU_new MESA_HIS_new NEO NFBC66 NFBC86 orcades PIVUS QBB Raine RS1 RS2 RS3 SAPALDIA_Edinburgh SAPALDIA_Gabriel SHIP-1 SHIP-TREND-0 SHIP-TREND-0_B2 Split Twins_UK UKB_AFR UKB_AMR UKB_EAS UKB_EUR UKB_SAS UKHLS VIKING Vis YFS	0.769683	0.878646	0.872842	0.872069	0.655489	581889	581887	577219	421045	0.7825	0.7836	0.7737	0.7627	0.0031	-0.0044	0.002	0.018	0.0011	0.0013	0.0002	0.0036	0.005105	0.0007825	5.3e-35	7.624e-07	AC034220.3(eQTL), AFF4(rare_disease), C5orf56(nearest), IRF1(PoPs), P4HA2(eQTL), SLC22A5(eQTL)
C5orf56	rs10477741	FALSE			5_131795310_G_T	5	131795310	PEF	PEF,FEV1	T	G	0.874	0.126	6.077	1.23e-09	--++++++----++---+++++	ALSPAC ARIC_AA B58C EPIC FinnTwin hunt LBC1936 orcades Raine RS1 RS2 RS3 SHIP-1 SHIP-TREND-0 SHIP-TREND-0_B2 Split UKB_AFR UKB_AMR UKB_EAS UKB_EUR UKB_SAS VIKING	0.872425	0.986741	0.965593	0.925072	0.804351	581883	581881	577213	421045	0.8732	0.8735	0.8706	0.8739	0.0058	-0.0017	0.002	0.0272	0.0015	0.0017	0.0002	0.0046	7.699e-05	0.3184	9.408e-23	4.033e-09	C5orf56(eQTL,nearest), AFF4(rare_disease), IL13(mouse_KO), IRF1(PoPs), SLC22A5(eQTL), Y_RNA(eQTL)
HSPA4	rs76495289	TRUE	rs113638840	31911640	5_132418974_A_T	5	132418974	FEV1	PEF,FEV1,FF	A	T	0.764	0.236	9.167	4.87e-20	+++++--++++++++++--+-++-++-++++++-++++--+++-+++-++	ALHS ALSPAC ARIC_AA ARIC_EA B58C BHS CHSAA CHSEA CKB EPIC EXCEED FHS FinnTwin GS20K H2000 HCHS hunt KORA_F4 KORA_S3 Korcula LBC1936 MESA_AFA_new MESA_CAU_new MESA_HIS_new NEO NFBC66 NFBC86 orcades PIVUS QBB Raine RS1 RS2 RS3 SAPALDIA_Edinburgh SAPALDIA_Gabriel SHIP-1 SHIP-TREND-0 SHIP-TREND-0_B2 Split Twins_UK UKB_AFR UKB_AMR UKB_EAS UKB_EUR UKB_SAS UKHLS VIKING Vis YFS	0.743549	0.773942	0.874369	0.757786	0.756928	581888	581886	577218	421045	0.7573	0.7594	0.7484	0.7474	0.0096	0.0069	0.0012	0.0231	0.0011	0.0013	0.0002	0.0035	7.029e-19	6.758e-08	9.346e-16	4.378e-11	AFF4(rare_disease,PoPs), HSPA4(nearest)
CXXC5	rs796778052	FALSE			5_139053438_A_AG	5	139053438	PEF		A	AG	0.666	0.334	7.928	2.23e-15	?+??????????????+++++?	ALSPAC ARIC_AA B58C EPIC FinnTwin hunt LBC1936 orcades Raine RS1 RS2 RS3 SHIP-1 SHIP-TREND-0 SHIP-TREND-0_B2 Split UKB_AFR UKB_AMR UKB_EAS UKB_EUR UKB_SAS VIKING	0.667347	0.592884	0.921176	0.632787	0.644094	420050	420050	420050	336335	0.6899	0.6935	0.6724	0.666	0.0034	0.0031	0.0002	0.0297	0.0013	0.0015	0.0002	0.0038	0.006969	0.03718	0.256	6.138e-15	CXXC5(nearest), PURA(rare_disease), TMEM173(PoPs)
VTRNA1-3	rs2563291	FALSE			5_140119599_A_T	5	140119599	FVC	FEV1,FVC	A	T	0.464	0.464	-7.508	6.01e-14	--+-------+--+----++------------++---+----+---+---	ALHS ALSPAC ARIC_AA ARIC_EA B58C BHS CHSAA CHSEA CKB EPIC EXCEED FHS FinnTwin GS20K H2000 HCHS hunt KORA_F4 KORA_S3 Korcula LBC1936 MESA_AFA_new MESA_CAU_new MESA_HIS_new NEO NFBC66 NFBC86 orcades PIVUS QBB Raine RS1 RS2 RS3 SAPALDIA_Edinburgh SAPALDIA_Gabriel SHIP-1 SHIP-TREND-0 SHIP-TREND-0_B2 Split Twins_UK UKB_AFR UKB_AMR UKB_EAS UKB_EUR UKB_SAS UKHLS VIKING Vis YFS	0.460038	0.634586	0.474669	0.462821	0.459684	581889	581887	577219	421045	0.4622	0.4626	0.4653	0.459	-0.0066	-0.0081	-0.0001	-0.0037	0.0009	0.0011	0.0001	0.0031	3.02e-13	2.321e-14	0.263	0.228	APBB3(PoPs), VTRNA1-3(nearest)
LOC101926941	rs253438	FALSE			5_141801216_A_G	5	141801216	FEV1	FEV1,FVC,FF	A	G	0.506	0.494	-7.442	9.95e-14	+++---+----+--------+-+---+--+++-+-+----+-----+++-	ALHS ALSPAC ARIC_AA ARIC_EA B58C BHS CHSAA CHSEA CKB EPIC EXCEED FHS FinnTwin GS20K H2000 HCHS hunt KORA_F4 KORA_S3 Korcula LBC1936 MESA_AFA_new MESA_CAU_new MESA_HIS_new NEO NFBC66 NFBC86 orcades PIVUS QBB Raine RS1 RS2 RS3 SAPALDIA_Edinburgh SAPALDIA_Gabriel SHIP-1 SHIP-TREND-0 SHIP-TREND-0_B2 Split Twins_UK UKB_AFR UKB_AMR UKB_EAS UKB_EUR UKB_SAS UKHLS VIKING Vis YFS	0.56267	0.125266	0.278772	0.469621	0.379625	581889	581887	577219	421045	0.5058	0.5024	0.5387	0.5592	-0.0064	-0.0059	-0.0006	-0.0147	0.0009	0.0011	0.0001	0.0031	4.546e-12	5.492e-08	5.543e-06	1.827e-06	FGF1(PoPs), LOC101926941(nearest), NR3C1(eQTL)
NR3C1	rs258763	FALSE			5_142652361_A_T	5	142652361	FVC	FVC,FF	A	T	0.509	0.491	-8.023	1.03e-15	+------+----+----+++-++----++--+----++----++-+---+	ALHS ALSPAC ARIC_AA ARIC_EA B58C BHS CHSAA CHSEA CKB EPIC EXCEED FHS FinnTwin GS20K H2000 HCHS hunt KORA_F4 KORA_S3 Korcula LBC1936 MESA_AFA_new MESA_CAU_new MESA_HIS_new NEO NFBC66 NFBC86 orcades PIVUS QBB Raine RS1 RS2 RS3 SAPALDIA_Edinburgh SAPALDIA_Gabriel SHIP-1 SHIP-TREND-0 SHIP-TREND-0_B2 Split Twins_UK UKB_AFR UKB_AMR UKB_EAS UKB_EUR UKB_SAS UKHLS VIKING Vis YFS	0.56763	0.321554	0.266742	0.520686	0.403287	581889	581887	577219	421045	0.5094	0.5054	0.5396	0.5538	-0.0039	-0.0083	0.0008	-0.0004	0.0009	0.0011	0.0001	0.0031	3.805e-05	3.17e-14	9.284e-10	0.907	NR3C1(eQTL,PoPs,nearest)
HTR4	rs7733410	TRUE	rs7715901	20010834	5_147856522_A_G	5	147856522	FEV1/FVC	PEF,FEV1,FF	A	G	0.471	0.471	24.385	2.47e-131	++++++++++++-++++++-++++++-+++++-++++++++++-+++++-	ALHS ALSPAC ARIC_AA ARIC_EA B58C BHS CHSAA CHSEA CKB EPIC EXCEED FHS FinnTwin GS20K H2000 HCHS hunt KORA_F4 KORA_S3 Korcula LBC1936 MESA_AFA_new MESA_CAU_new MESA_HIS_new NEO NFBC66 NFBC86 orcades PIVUS QBB Raine RS1 RS2 RS3 SAPALDIA_Edinburgh SAPALDIA_Gabriel SHIP-1 SHIP-TREND-0 SHIP-TREND-0_B2 Split Twins_UK UKB_AFR UKB_AMR UKB_EAS UKB_EUR UKB_SAS UKHLS VIKING Vis YFS	0.442382	0.283534	0.669437	0.402609	0.439813	581857	581855	577187	421045	0.4784	0.4809	0.4547	0.4365	0.0154	0.0059	0.0032	0.0387	0.0009	0.0011	0.0001	0.0031	1.91e-62	4.75e-08	2.52e-128	5.422e-36	FBXO38(PoPs), HTR4(nearest), SPINK5(rare_disease)
HTR4	rs10041818	FALSE			5_148071254_C_T	5	148071254	FVC		T	C	0.395	0.395	7.256	3.99e-13	---++++++-++-++++-++--+++++--++--++++++-++++-++-+	ALHS ALSPAC ARIC_AA ARIC_EA B58C BHS CHSAA CHSEA CKB EPIC EXCEED FHS FinnTwin GS20K H2000 HCHS hunt KORA_F4 KORA_S3 Korcula LBC1936 MESA_AFA_new MESA_CAU_new MESA_HIS_new NEO NFBC66 NFBC86 orcades PIVUS Raine RS1 RS2 RS3 SAPALDIA_Edinburgh SAPALDIA_Gabriel SHIP-1 SHIP-TREND-0 SHIP-TREND-0_B2 Split Twins_UK UKB_AFR UKB_AMR UKB_EAS UKB_EUR UKB_SAS UKHLS VIKING Vis YFS	0.38232	0.256142	0.479248	0.43545	0.413289	581888	581886	577218	421045	0.4048	0.4058	0.389	0.3767	0.0037	0.0069	-0.0005	-0.0016	0.0009	0.0011	0.0001	0.0031	5.223e-05	2.922e-10	0.0001388	0.6184	ADRB2(PoPs), HTR4(nearest)
ADRB2	rs35684381	FALSE			5_148203236_C_T	5	148203236	FEV1	FEV1,FF	T	C	0.829	0.171	-9.547	1.34e-21	---------------+-++-++----------+--+++--------+-+	ALHS ALSPAC ARIC_AA ARIC_EA B58C BHS CHSAA CHSEA CKB EPIC EXCEED FHS FinnTwin GS20K H2000 HCHS hunt KORA_F4 KORA_S3 Korcula LBC1936 MESA_AFA_new MESA_CAU_new MESA_HIS_new NEO NFBC66 NFBC86 orcades PIVUS Raine RS1 RS2 RS3 SAPALDIA_Edinburgh SAPALDIA_Gabriel SHIP-1 SHIP-TREND-0 SHIP-TREND-0_B2 Split Twins_UK UKB_AFR UKB_AMR UKB_EAS UKB_EUR UKB_SAS UKHLS VIKING Vis YFS	0.854741	0.813232	0.64537	0.807791	0.682318	581872	581870	577202	421045	0.7949	0.79	0.8257	0.8441	-0.0115	-0.0078	-0.0017	-0.0259	0.0012	0.0014	0.0002	0.0043	7.092e-22	1.394e-08	5.855e-20	1.519e-09	ADRB2(PoPs,nearest), PPARGC1B(eQTL), SH3TC2(eQTL)
ADRB2	rs1800888	TRUE	rs1800888	30804560	5_148206885_C_T	5	148206885	FEV1/FVC	PEF,FEV1,FF	T	C	0.0146	0.0146	-10.913	1e-27	--?+-+?-?-++--+?--++-?+?--+---+-+---++--???-?--+?	ALHS ALSPAC ARIC_AA ARIC_EA B58C BHS CHSAA CHSEA CKB EPIC EXCEED FHS FinnTwin GS20K H2000 HCHS hunt KORA_F4 KORA_S3 Korcula LBC1936 MESA_AFA_new MESA_CAU_new MESA_HIS_new NEO NFBC66 NFBC86 orcades PIVUS Raine RS1 RS2 RS3 SAPALDIA_Edinburgh SAPALDIA_Gabriel SHIP-1 SHIP-TREND-0 SHIP-TREND-0_B2 Split Twins_UK UKB_AFR UKB_AMR UKB_EAS UKB_EUR UKB_SAS UKHLS VIKING Vis YFS	0.0148976	0.000591436	0	0.00875625	0.00444965	488333	488330	483294	413807	0.0146	0.0146	0.0147	0.0145	-0.0385	-0.0224	-0.0062	-0.1128	0.0043	0.0051	0.0006	0.0129	3.58e-19	1.106e-05	4.918e-26	2.578e-18	ADRB2(PoPs,credible,nearest)
AFAP1L1	rs62378114	TRUE	rs3839234	28166213	5_148651395_A_T	5	148651395	FEV1	PEF,FEV1,FVC,FF	A	T	0.578	0.422	9.202	3.53e-20	??-?????+??????+?????-?+????????????????-?+++????	ALHS ALSPAC ARIC_AA ARIC_EA B58C BHS CHSAA CHSEA CKB EPIC EXCEED FHS FinnTwin GS20K H2000 HCHS hunt KORA_F4 KORA_S3 Korcula LBC1936 MESA_AFA_new MESA_CAU_new MESA_HIS_new NEO NFBC66 NFBC86 orcades PIVUS Raine RS1 RS2 RS3 SAPALDIA_Edinburgh SAPALDIA_Gabriel SHIP-1 SHIP-TREND-0 SHIP-TREND-0_B2 Split Twins_UK UKB_AFR UKB_AMR UKB_EAS UKB_EUR UKB_SAS UKHLS VIKING Vis YFS	0.597864	0.839737	0.408618	0.71802	0.624861	444374	444374	444374	349113	0.5655	0.5603	0.5871	0.5985	0.0102	0.0093	0.001	0.0185	0.0011	0.0013	0.0002	0.0036	5.205e-21	1.68e-13	1.884e-10	3.164e-07	AFAP1L1(eQTL,nearest), IL17B(PoPs), PPARGC1B(eQTL), SH3TC2(eQTL)
PPARGC1B	rs13174179	FALSE			5_149150671_A_G	5	149150671	FEV1/FVC		A	G	0.324	0.324	6.051	1.44e-09	+++-+++-+-+++-+--+-+++++---++-++++++++	ALHS ALSPAC ARIC_EA B58C BHS CHSEA EPIC EXCEED FHS FinnTwin GS20K H2000 hunt KORA_F4 KORA_S3 Korcula LBC1936 MESA_CAU_new NEO NFBC66 NFBC86 orcades PIVUS Raine RS1 RS2 RS3 SAPALDIA_Edinburgh SAPALDIA_Gabriel SHIP-1 SHIP-TREND-0 SHIP-TREND-0_B2 Split Twins_UK UKB_EUR UKHLS VIKING Vis	0.3238	0.431572	0.413678	0.324275	0.51502	581889	581887	577219	421045	0.3447	0.3464	0.3362	0.3269	0.0036	0.0007	0.0009	0.0119	0.001	0.0011	0.0001	0.0033	0.0001509	0.5285	1.869e-10	0.0002801	PPARGC1B(PoPs,nearest), AFAP1L1(eQTL), PDE6A(mouse_KO), SLC26A2(rare_disease)
CCDC69	rs12657476	FALSE			5_150566196_C_T	5	150566196	FEV1/FVC		T	C	0.448	0.448	-6.066	1.31e-09	+--------+--+-++--+----+---------+---+	ALHS ALSPAC ARIC_EA B58C BHS CHSEA EPIC EXCEED FHS FinnTwin GS20K H2000 hunt KORA_F4 KORA_S3 Korcula LBC1936 MESA_CAU_new NEO NFBC66 NFBC86 orcades PIVUS Raine RS1 RS2 RS3 SAPALDIA_Edinburgh SAPALDIA_Gabriel SHIP-1 SHIP-TREND-0 SHIP-TREND-0_B2 Split Twins_UK UKB_EUR UKHLS VIKING Vis	0.450092	0.406723	0.340488	0.440195	0.398091	581886	581884	577216	421045	0.4249	0.4221	0.4388	0.4415	-0.0053	-0.0027	-0.0009	-0.011	0.0009	0.0011	0.0001	0.0031	9.093e-09	0.01066	5.288e-12	0.0003564	CCDC69(eQTL,nearest), ANXA6(PoPs)
CCDC69	rs58707188	FALSE			5_150597378_C_T	5	150597378	FEV1/FVC	PEF,FEV1,FF	T	C	0.177	0.177	-8.96	3.26e-19	---------------++-+-++-----+---+-+-+-+	ALHS ALSPAC ARIC_EA B58C BHS CHSEA EPIC EXCEED FHS FinnTwin GS20K H2000 hunt KORA_F4 KORA_S3 Korcula LBC1936 MESA_CAU_new NEO NFBC66 NFBC86 orcades PIVUS Raine RS1 RS2 RS3 SAPALDIA_Edinburgh SAPALDIA_Gabriel SHIP-1 SHIP-TREND-0 SHIP-TREND-0_B2 Split Twins_UK UKB_EUR UKHLS VIKING Vis	0.178474	0.162732	0.0946404	0.148678	0.147922	581869	581867	577199	421045	0.1655	0.1642	0.172	0.1743	-0.0092	-0.0056	-0.0015	-0.0258	0.0013	0.0015	0.0002	0.004	1.878e-13	0.0001465	7.949e-18	1.562e-10	ANXA6(PoPs), CCDC69(nearest), GM2A(eQTL)
LARP1	rs78924036	FALSE			5_154149065_A_G	5	154149065	FEV1		A	G	0.0333	0.0333	-5.952	2.65e-09	-----+-+?-+--+-+----+---+--------+-+-+--+--?----++	ALHS ALSPAC ARIC_AA ARIC_EA B58C BHS CHSAA CHSEA CKB EPIC EXCEED FHS FinnTwin GS20K H2000 HCHS hunt KORA_F4 KORA_S3 Korcula LBC1936 MESA_AFA_new MESA_CAU_new MESA_HIS_new NEO NFBC66 NFBC86 orcades PIVUS QBB Raine RS1 RS2 RS3 SAPALDIA_Edinburgh SAPALDIA_Gabriel SHIP-1 SHIP-TREND-0 SHIP-TREND-0_B2 Split Twins_UK UKB_AFR UKB_AMR UKB_EAS UKB_EUR UKB_SAS UKHLS VIKING Vis YFS	0.0351754	0.00210458	0.000694549	0.020015	0.0411751	495912	495910	491242	419481	0.0343	0.0343	0.0345	0.0343	-0.016	-0.0136	-0.0017	-0.0273	0.0028	0.0033	0.0004	0.0085	1.188e-08	4.04e-05	9.94e-06	0.001323	LARP1(PoPs,nearest)
ADAM19	rs11134767	TRUE	rs10515750	28166213	5_156908653_C_T	5	156908653	FEV1/FVC		T	C	0.0634	0.0634	-8.644	5.44e-18	+-?---?+?----+------+?----+-+-+---+--+--?-?-----+	ALHS ALSPAC ARIC_AA ARIC_EA B58C BHS CHSAA CHSEA CKB EPIC EXCEED FHS FinnTwin GS20K H2000 HCHS hunt KORA_F4 KORA_S3 Korcula LBC1936 MESA_AFA_new MESA_CAU_new MESA_HIS_new NEO NFBC66 NFBC86 orcades PIVUS Raine RS1 RS2 RS3 SAPALDIA_Edinburgh SAPALDIA_Gabriel SHIP-1 SHIP-TREND-0 SHIP-TREND-0_B2 Split Twins_UK UKB_AFR UKB_AMR UKB_EAS UKB_EUR UKB_SAS UKHLS VIKING Vis YFS	0.0633935	0.0055595	0.000319693	0.0755897	0.0181499	580325	580323	575655	419481	0.0641	0.064	0.0641	0.0628	-0.0158	-0.0028	-0.0039	-0.0545	0.0021	0.0024	0.0003	0.0063	2.116e-14	0.2571	7.975e-44	6.477e-18	ADAM19(PoPs,nearest), ITK(rare_disease)
ADAM19	rs35413759	FALSE			5_156918147_A_T	5	156918147	FEV1		A	T	0.88	0.12	-6.043	1.52e-09	+++---+------+?--++--++-+--+-++---++----+---+----	ALHS ALSPAC ARIC_AA ARIC_EA B58C BHS CHSAA CHSEA CKB EPIC EXCEED FHS FinnTwin GS20K H2000 HCHS hunt KORA_F4 KORA_S3 Korcula LBC1936 MESA_AFA_new MESA_CAU_new MESA_HIS_new NEO NFBC66 NFBC86 orcades PIVUS Raine RS1 RS2 RS3 SAPALDIA_Edinburgh SAPALDIA_Gabriel SHIP-1 SHIP-TREND-0 SHIP-TREND-0_B2 Split Twins_UK UKB_AFR UKB_AMR UKB_EAS UKB_EUR UKB_SAS UKHLS VIKING Vis YFS	0.861268	0.946815	0.991714	0.853467	0.941244	578078	578076	573408	421045	0.8643	0.8644	0.8635	0.8645	-0.0129	-0.0051	-0.0024	-0.0312	0.0015	0.0017	0.0002	0.0045	1.967e-18	0.003433	7.747e-33	3.027e-12	ADAM19(PoPs,nearest), ITK(rare_disease)
ADAM19	rs4331881	TRUE	rs1990950	20010835	5_156944475_G_T	5	156944475	FEV1/FVC	PEF,FEV1,FF	T	G	0.321	0.321	-17.958	4.18e-72	+-----------+--------------+---+------++---------+	ALHS ALSPAC ARIC_AA ARIC_EA B58C BHS CHSAA CHSEA CKB EPIC EXCEED FHS FinnTwin GS20K H2000 HCHS hunt KORA_F4 KORA_S3 Korcula LBC1936 MESA_AFA_new MESA_CAU_new MESA_HIS_new NEO NFBC66 NFBC86 orcades PIVUS QBB Raine RS1 RS2 RS3 SAPALDIA_Edinburgh SAPALDIA_Gabriel SHIP-1 SHIP-TREND-0 SHIP-TREND-0_B2 Split Twins_UK UKB_AFR UKB_AMR UKB_EAS UKB_EUR UKB_SAS UKHLS VIKING Vis YFS	0.341312	0.634052	0.142294	0.436764	0.480658	581886	581884	577216	421045	0.3316	0.3287	0.344	0.3457	-0.0109	-0.0031	-0.0024	-0.0376	0.001	0.0012	0.0001	0.0032	2.457e-28	0.008016	7.739e-68	1.306e-31	ADAM19(PoPs,nearest), ITK(rare_disease)
ADAM19	rs72811372	TRUE	rs72811372	31911640	5_157022475_A_G	5	157022475	FEV1/FVC		A	G	0.103	0.103	7.785	6.98e-15	+++++--++-++-+-++++-++-+++++-+++--++++++-++	ALHS ALSPAC ARIC_EA B58C BHS CHSEA EPIC EXCEED FHS FinnTwin GS20K H2000 HCHS hunt KORA_F4 KORA_S3 Korcula LBC1936 MESA_CAU_new MESA_HIS_new NEO NFBC66 NFBC86 orcades PIVUS Raine RS1 RS2 RS3 SAPALDIA_Edinburgh SAPALDIA_Gabriel SHIP-1 SHIP-TREND-0 SHIP-TREND-0_B2 Split Twins_UK UKB_AMR UKB_EUR UKB_SAS UKHLS VIKING Vis YFS	0.104379	0.121165	0.00410837	0.119695	0.0381834	581882	581880	577212	421045	0.1047	0.1046	0.1045	0.1035	0.0112	0.0021	0.0026	0.0317	0.0016	0.0019	0.0002	0.005	9.423e-12	0.2671	1.779e-30	2.604e-10	ADAM19(PoPs,nearest), ITK(rare_disease), SGCD(eQTL)
EBF1	rs7443323	TRUE	rs7443323	31911640	5_158368797_A_T	5	158368797	FVC	FEV1,FVC	A	T	0.251	0.251	-8.84	9.56e-19	+-----+---?+--+---++---+-+--+-+-+-+--+---+----++--	ALHS ALSPAC ARIC_AA ARIC_EA B58C BHS CHSAA CHSEA CKB EPIC EXCEED FHS FinnTwin GS20K H2000 HCHS hunt KORA_F4 KORA_S3 Korcula LBC1936 MESA_AFA_new MESA_CAU_new MESA_HIS_new NEO NFBC66 NFBC86 orcades PIVUS QBB Raine RS1 RS2 RS3 SAPALDIA_Edinburgh SAPALDIA_Gabriel SHIP-1 SHIP-TREND-0 SHIP-TREND-0_B2 Split Twins_UK UKB_AFR UKB_AMR UKB_EAS UKB_EUR UKB_SAS UKHLS VIKING Vis YFS	0.251398	0.0248301	0.249743	0.315276	0.513447	581889	581887	577219	421045	0.2551	0.2548	0.2549	0.2528	-0.0076	-0.0107	0.0003	-0.0072	0.0011	0.0012	0.0002	0.0035	7.646e-13	2.281e-18	0.09404	0.04054	EBF1(PoPs,nearest)
FGF18	rs10059996	TRUE	rs10059996	30804560	5_170901463_G_T	5	170901463	FEV1/FVC		T	G	0.418	0.418	-13.466	2.49e-41	+---------------+-++-+-----++--+-+-+-------+-+---+	ALHS ALSPAC ARIC_AA ARIC_EA B58C BHS CHSAA CHSEA CKB EPIC EXCEED FHS FinnTwin GS20K H2000 HCHS hunt KORA_F4 KORA_S3 Korcula LBC1936 MESA_AFA_new MESA_CAU_new MESA_HIS_new NEO NFBC66 NFBC86 orcades PIVUS QBB Raine RS1 RS2 RS3 SAPALDIA_Edinburgh SAPALDIA_Gabriel SHIP-1 SHIP-TREND-0 SHIP-TREND-0_B2 Split Twins_UK UKB_AFR UKB_AMR UKB_EAS UKB_EUR UKB_SAS UKHLS VIKING Vis YFS	0.354156	0.747405	0.680732	0.435956	0.6407	581808	581806	577138	421045	0.4301	0.434	0.385	0.3706	-0.0053	0.0015	-0.0019	-0.0174	0.001	0.0011	0.0001	0.0033	5.276e-08	0.189	9.851e-41	1.099e-07	FGF18(PoPs,nearest)
MIR8056	rs11747434	FALSE			5_172779211_C_T	5	172779211	PEF	PEF,FEV1	T	C	0.719	0.281	-11.889	1.35e-32	----------+------+----	ALSPAC ARIC_AA B58C EPIC FinnTwin hunt LBC1936 orcades Raine RS1 RS2 RS3 SHIP-1 SHIP-TREND-0 SHIP-TREND-0_B2 Split UKB_AFR UKB_AMR UKB_EAS UKB_EUR UKB_SAS VIKING	0.721967	0.618242	0.729123	0.724246	0.755728	581888	581886	577218	421045	0.7172	0.7171	0.7186	0.7224	-0.0051	-0.0058	-0.0002	-0.0386	0.001	0.0012	0.0001	0.0034	3.086e-07	7.038e-07	0.2724	1.462e-29	CREBRF(PoPs), MIR8056(nearest), STC2(WES)
NSD1	rs2431501	FALSE			5_176606052_A_T	5	176606052	FEV1/FVC		A	T	0.712	0.288	-7.18	6.96e-13	++----+---+---+---++---++---+-----++-+---+---++-+-	ALHS ALSPAC ARIC_AA ARIC_EA B58C BHS CHSAA CHSEA CKB EPIC EXCEED FHS FinnTwin GS20K H2000 HCHS hunt KORA_F4 KORA_S3 Korcula LBC1936 MESA_AFA_new MESA_CAU_new MESA_HIS_new NEO NFBC66 NFBC86 orcades PIVUS QBB Raine RS1 RS2 RS3 SAPALDIA_Edinburgh SAPALDIA_Gabriel SHIP-1 SHIP-TREND-0 SHIP-TREND-0_B2 Split Twins_UK UKB_AFR UKB_AMR UKB_EAS UKB_EUR UKB_SAS UKHLS VIKING Vis YFS	0.650736	0.981267	0.997356	0.678397	0.897758	580318	580316	575648	419481	0.6594	0.6594	0.6575	0.6481	-0.0022	0.0021	-0.001	-0.0146	0.0011	0.0013	0.0001	0.0032	0.0399	0.08942	1.033e-12	6.324e-06	NSD1(PoPs,nearest), B4GALT7(rare_disease), MXD3(eQTL)
ADAMTS2	rs17079284	FALSE			5_178693963_C_T	5	178693963	FEV1/FVC		T	C	0.95	0.05	-8.171	3.05e-16	-++--++-----+-+--++-+-+----+-+----+--++-++------+	ALHS ALSPAC ARIC_AA ARIC_EA B58C BHS CHSAA CHSEA CKB EPIC EXCEED FHS FinnTwin GS20K H2000 HCHS hunt KORA_F4 KORA_S3 Korcula LBC1936 MESA_AFA_new MESA_CAU_new MESA_HIS_new NEO NFBC66 NFBC86 orcades PIVUS Raine RS1 RS2 RS3 SAPALDIA_Edinburgh SAPALDIA_Gabriel SHIP-1 SHIP-TREND-0 SHIP-TREND-0_B2 Split Twins_UK UKB_AFR UKB_AMR UKB_EAS UKB_EUR UKB_SAS UKHLS VIKING Vis YFS	0.971913	0.9804	0.816099	0.94593	0.828631	581843	581841	577173	421045	0.8688	0.8641	0.9111	0.9613	-0.0051	0.0019	-0.0025	-0.0212	0.0019	0.0022	0.0003	0.0089	0.00899	0.3889	2.379e-14	0.01742	ADAMTS2(PoPs,nearest), ZNF354C(eQTL)
RASGEF1C	rs79898473	TRUE	rs79898473	30804560	5_179598771_C_T	5	179598771	FEV1/FVC	PEF,FEV1,FF	T	C	0.7	0.3	-12.682	7.43e-37	-+-----+--+-++----++-------++--+-+--+--+-----+--++	ALHS ALSPAC ARIC_AA ARIC_EA B58C BHS CHSAA CHSEA CKB EPIC EXCEED FHS FinnTwin GS20K H2000 HCHS hunt KORA_F4 KORA_S3 Korcula LBC1936 MESA_AFA_new MESA_CAU_new MESA_HIS_new NEO NFBC66 NFBC86 orcades PIVUS QBB Raine RS1 RS2 RS3 SAPALDIA_Edinburgh SAPALDIA_Gabriel SHIP-1 SHIP-TREND-0 SHIP-TREND-0_B2 Split Twins_UK UKB_AFR UKB_AMR UKB_EAS UKB_EUR UKB_SAS UKHLS VIKING Vis YFS	0.668406	0.884643	0.817123	0.683942	0.661624	581876	581874	577206	421045	0.6951	0.6979	0.6806	0.6753	-0.0065	-0.0011	-0.0017	-0.0245	0.001	0.0012	0.0001	0.0033	1.342e-10	0.3576	1.398e-32	8.981e-14	GFPT2(PoPs), RASGEF1C(nearest)
EXOC2	rs9502440	FALSE			6_688741_G_T	6	688741	FEV1/FVC		T	G	0.894	0.106	6.102	1.05e-09	-++-++-+++++-++++---+++--+--+-++++++++-+++++++++++	ALHS ALSPAC ARIC_AA ARIC_EA B58C BHS CHSAA CHSEA CKB EPIC EXCEED FHS FinnTwin GS20K H2000 HCHS hunt KORA_F4 KORA_S3 Korcula LBC1936 MESA_AFA_new MESA_CAU_new MESA_HIS_new NEO NFBC66 NFBC86 orcades PIVUS QBB Raine RS1 RS2 RS3 SAPALDIA_Edinburgh SAPALDIA_Gabriel SHIP-1 SHIP-TREND-0 SHIP-TREND-0_B2 Split Twins_UK UKB_AFR UKB_AMR UKB_EAS UKB_EUR UKB_SAS UKHLS VIKING Vis YFS	0.887239	0.719896	0.933184	0.860793	0.92623	581886	581884	577216	421045	0.8864	0.8869	0.8829	0.883	0.0066	0.003	0.0012	0.0139	0.0015	0.0017	0.0002	0.0048	1.016e-05	0.08631	7.691e-09	0.003659	EXOC2(PoPs,nearest)
GMDS	rs2318089	FALSE			6_1775436_A_G	6	1775436	PEF	PEF,FEV1,FF	A	G	0.285	0.285	10.217	1.66e-24	-+++-++++-+++-++-+++-+	ALSPAC ARIC_AA B58C EPIC FinnTwin hunt LBC1936 orcades Raine RS1 RS2 RS3 SHIP-1 SHIP-TREND-0 SHIP-TREND-0_B2 Split UKB_AFR UKB_AMR UKB_EAS UKB_EUR UKB_SAS VIKING	0.284387	0.111769	0.330777	0.182865	0.45356	581889	581887	577219	421045	0.2994	0.3006	0.2939	0.2824	0.0064	0.0042	0.0009	0.0352	0.001	0.0012	0.0001	0.0034	8.615e-11	0.0003167	8.742e-10	3.758e-25	FOXC1(PoPs), GMDS(nearest)
GMDS-AS1	rs11242779	FALSE			6_2507901_C_T	6	2507901	PEF	PEF,FEV1,FVC	T	C	0.514	0.486	10.416	2.09e-25	++++++-+--++++-----+++	ALSPAC ARIC_AA B58C EPIC FinnTwin hunt LBC1936 orcades Raine RS1 RS2 RS3 SHIP-1 SHIP-TREND-0 SHIP-TREND-0_B2 Split UKB_AFR UKB_AMR UKB_EAS UKB_EUR UKB_SAS VIKING	0.509433	0.763959	0.795232	0.478853	0.535971	581886	581884	577216	421045	0.5472	0.5509	0.5256	0.5168	0.0057	0.0068	0.0002	0.0319	0.0009	0.0011	0.0001	0.0031	1.752e-09	6.409e-10	0.1534	2.893e-25	GMDS-AS1(nearest), MYLK4(PoPs)
LY86	rs1294417	TRUE	rs1294421	30175238	6_6741932_C_T	6	6741932	FEV1/FVC		T	C	0.509	0.491	-15.02	5.42e-51	------++--+---+----------------------+--+--+------	ALHS ALSPAC ARIC_AA ARIC_EA B58C BHS CHSAA CHSEA CKB EPIC EXCEED FHS FinnTwin GS20K H2000 HCHS hunt KORA_F4 KORA_S3 Korcula LBC1936 MESA_AFA_new MESA_CAU_new MESA_HIS_new NEO NFBC66 NFBC86 orcades PIVUS QBB Raine RS1 RS2 RS3 SAPALDIA_Edinburgh SAPALDIA_Gabriel SHIP-1 SHIP-TREND-0 SHIP-TREND-0_B2 Split Twins_UK UKB_AFR UKB_AMR UKB_EAS UKB_EUR UKB_SAS UKHLS VIKING Vis YFS	0.458801	0.6153	0.784791	0.471578	0.60852	581886	581884	577216	421045	0.508	0.5115	0.4795	0.4704	-0.0039	0.0028	-0.0019	-0.0167	0.0009	0.0011	0.0001	0.0031	3.129e-05	0.01165	1.725e-44	6.082e-08	LY86(PoPs,nearest)
LY86	rs17142630	FALSE			6_6857640_A_G	6	6857640	FEV1/FVC		A	G	0.87	0.13	-7.476	7.67e-14	--++------++----+-+-+++---++++------+-+--------	ALHS ALSPAC ARIC_AA ARIC_EA B58C BHS CHSAA CHSEA EPIC EXCEED FHS FinnTwin GS20K H2000 HCHS hunt KORA_F4 KORA_S3 Korcula LBC1936 MESA_AFA_new MESA_CAU_new MESA_HIS_new NEO NFBC66 NFBC86 orcades PIVUS Raine RS1 RS2 RS3 SAPALDIA_Edinburgh SAPALDIA_Gabriel SHIP-1 SHIP-TREND-0 SHIP-TREND-0_B2 Split Twins_UK UKB_AFR UKB_AMR UKB_EUR UKB_SAS UKHLS VIKING Vis YFS	0.878715	0.441136	0.767162	0.795104	0.811139	581889	581887	577219	421045	0.8377	0.8367	0.8499	0.8619	-0.001	0.0038	-0.0015	-0.0194	0.0013	0.0015	0.0002	0.0046	0.4362	0.01078	3.496e-14	2.138e-05	LY86(PoPs,nearest)
RREB1	rs675209	FALSE			6_7102084_C_T	6	7102084	FVC		T	C	0.278	0.278	6.493	8.44e-11	---+++++++++++-+-+-+++--++-+-+--+-+++-+-++++++-	ALHS ALSPAC ARIC_AA ARIC_EA B58C BHS CHSAA CHSEA EPIC EXCEED FHS FinnTwin GS20K H2000 HCHS hunt KORA_F4 KORA_S3 Korcula LBC1936 MESA_AFA_new MESA_CAU_new MESA_HIS_new NEO NFBC66 NFBC86 orcades PIVUS Raine RS1 RS2 RS3 SAPALDIA_Edinburgh SAPALDIA_Gabriel SHIP-1 SHIP-TREND-0 SHIP-TREND-0_B2 Split Twins_UK UKB_AFR UKB_AMR UKB_EUR UKB_SAS UKHLS VIKING Vis YFS	0.269385	0.463922	0.918798	0.275197	0.598126	581889	581887	577219	421045	0.3412	0.3474	0.301	0.2886	0.0026	0.0074	-0.0011	-0.01	0.0011	0.0013	0.0002	0.0034	0.01345	3.354e-09	7.783e-13	0.003467	RREB1(PoPs,nearest), SSR1(eQTL)
RREB1	rs144671758	FALSE			6_7102600_A_G	6	7102600	PEF		A	G	0.944	0.056	7.814	5.55e-15	+-++-++-++-++++-++-+-+	ALSPAC ARIC_AA B58C EPIC FinnTwin hunt LBC1936 orcades Raine RS1 RS2 RS3 SHIP-1 SHIP-TREND-0 SHIP-TREND-0_B2 Split UKB_AFR UKB_AMR UKB_EAS UKB_EUR UKB_SAS VIKING	0.942819	0.99304	0.956391	0.919292	0.947177	581873	581871	577203	421045	0.9424	0.9425	0.9431	0.9438	0.008	0.0013	0.0024	0.0544	0.002	0.0023	0.0003	0.0067	4.721e-05	0.5792	2.833e-16	3.047e-16	RREB1(PoPs,nearest)
RREB1	rs7451690	TRUE	rs4960289	31911640	6_7109433_C_T	6	7109433	FEV1/FVC		T	C	0.511	0.489	12.961	2.04e-38	++++++-+?+++-++-+++--++++-++++++++++-+-++-?++++++	ALHS ALSPAC ARIC_AA ARIC_EA B58C BHS CHSAA CHSEA CKB EPIC EXCEED FHS FinnTwin GS20K H2000 HCHS hunt KORA_F4 KORA_S3 Korcula LBC1936 MESA_AFA_new MESA_CAU_new MESA_HIS_new NEO NFBC66 NFBC86 orcades PIVUS Raine RS1 RS2 RS3 SAPALDIA_Edinburgh SAPALDIA_Gabriel SHIP-1 SHIP-TREND-0 SHIP-TREND-0_B2 Split Twins_UK UKB_AFR UKB_AMR UKB_EAS UKB_EUR UKB_SAS UKHLS VIKING Vis YFS	0.522743	0.0292977	0.00799107	0.468384	0.270539	581865	581863	577195	421045	0.5071	0.507	0.5118	0.51	0.0011	-0.0062	0.0017	0.0218	0.001	0.0012	0.0001	0.0031	0.28	2.306e-07	2.238e-33	2.491e-12	RREB1(PoPs,nearest)
RREB1	rs17672692	FALSE			6_7214499_C_T	6	7214499	FEV1/FVC		T	C	0.184	0.184	-6.414	1.42e-10	+--+-+++-+---+--+----+---+------+++-++------++-	ALHS ALSPAC ARIC_AA ARIC_EA B58C BHS CHSAA CHSEA EPIC EXCEED FHS FinnTwin GS20K H2000 HCHS hunt KORA_F4 KORA_S3 Korcula LBC1936 MESA_AFA_new MESA_CAU_new MESA_HIS_new NEO NFBC66 NFBC86 orcades PIVUS Raine RS1 RS2 RS3 SAPALDIA_Edinburgh SAPALDIA_Gabriel SHIP-1 SHIP-TREND-0 SHIP-TREND-0_B2 Split Twins_UK UKB_AFR UKB_AMR UKB_EUR UKB_SAS UKHLS VIKING Vis YFS	0.188651	0.00982201	0.0361278	0.0922795	0.0625628	581889	581887	577219	421045	0.1791	0.1784	0.1853	0.1867	-0.003	-0.0013	-0.0007	-0.0114	0.0013	0.0015	0.0002	0.004	0.01653	0.3826	3.03e-05	0.004011	RREB1(PoPs,nearest), SSR1(eQTL)
DSP	rs2076295	TRUE	rs2076295	28166215	6_7563232_G_T	6	7563232	FEV1/FVC	FVC,FF	T	G	0.551	0.449	-10.718	8.36e-27	---------+------+---+----+---------+----+----+-	ALHS ALSPAC ARIC_AA ARIC_EA B58C BHS CHSAA CHSEA EPIC EXCEED FHS FinnTwin GS20K H2000 HCHS hunt KORA_F4 KORA_S3 Korcula LBC1936 MESA_AFA_new MESA_CAU_new MESA_HIS_new NEO NFBC66 NFBC86 orcades PIVUS Raine RS1 RS2 RS3 SAPALDIA_Edinburgh SAPALDIA_Gabriel SHIP-1 SHIP-TREND-0 SHIP-TREND-0_B2 Split Twins_UK UKB_AFR UKB_AMR UKB_EUR UKB_SAS UKHLS VIKING Vis YFS	0.548591	0.503443	0.52259	0.581736	0.673981	581889	581887	577219	421045	0.5473	0.5464	0.5496	0.5556	0.0003	0.0059	-0.0014	-0.0087	0.0009	0.0011	0.0001	0.0031	0.7757	2.828e-08	1.475e-24	0.004568	DSP(eQTL,nearest), BMP6(PoPs)
BMP6	rs9392919	TRUE	rs12198986	30804560	6_7711052_A_G	6	7711052	FVC	FEV1,FVC	A	G	0.508	0.492	9.932	3.01e-23	+-+++++++++++++-+-+++-++++-+-+---+++++-++++-+++	ALHS ALSPAC ARIC_AA ARIC_EA B58C BHS CHSAA CHSEA EPIC EXCEED FHS FinnTwin GS20K H2000 HCHS hunt KORA_F4 KORA_S3 Korcula LBC1936 MESA_AFA_new MESA_CAU_new MESA_HIS_new NEO NFBC66 NFBC86 orcades PIVUS Raine RS1 RS2 RS3 SAPALDIA_Edinburgh SAPALDIA_Gabriel SHIP-1 SHIP-TREND-0 SHIP-TREND-0_B2 Split Twins_UK UKB_AFR UKB_AMR UKB_EUR UKB_SAS UKHLS VIKING Vis YFS	0.502562	0.709494	0.585466	0.555027	0.387974	581888	581886	577218	421045	0.5249	0.5269	0.5149	0.5138	0.0076	0.0103	0	0.0055	0.0009	0.0011	0.0001	0.0031	5.464e-17	3.103e-22	0.7849	0.07105	BMP6(eQTL,PoPs,nearest)
BMP6	rs56180096	TRUE	rs6924424	24929828	6_7792320_C_T	6	7792320	FVC	FEV1,FVC	T	C	0.14	0.14	-13.298	2.39e-40	------------------+---+-------+-------+------++---	ALHS ALSPAC ARIC_AA ARIC_EA B58C BHS CHSAA CHSEA CKB EPIC EXCEED FHS FinnTwin GS20K H2000 HCHS hunt KORA_F4 KORA_S3 Korcula LBC1936 MESA_AFA_new MESA_CAU_new MESA_HIS_new NEO NFBC66 NFBC86 orcades PIVUS QBB Raine RS1 RS2 RS3 SAPALDIA_Edinburgh SAPALDIA_Gabriel SHIP-1 SHIP-TREND-0 SHIP-TREND-0_B2 Split Twins_UK UKB_AFR UKB_AMR UKB_EAS UKB_EUR UKB_SAS UKHLS VIKING Vis YFS	0.157545	0.354965	0.00343263	0.125553	0.107194	581887	581885	577217	421045	0.1647	0.1651	0.1644	0.1607	-0.0152	-0.0217	0.0003	-0.0168	0.0014	0.0016	0.0002	0.0042	2.179e-29	2.405e-42	0.09994	5.76e-05	BMP6(PoPs,nearest)
BLOC1S5-TXNDC5	rs2023263	FALSE			6_7958465_C_T	6	7958465	FEV1/FVC		T	C	0.559	0.441	-5.886	3.97e-09	-+-+++---+-+-?----++----+-+++-----++-+------+++	ALHS ALSPAC ARIC_AA ARIC_EA B58C BHS CHSAA CHSEA EPIC EXCEED FHS FinnTwin GS20K H2000 HCHS hunt KORA_F4 KORA_S3 Korcula LBC1936 MESA_AFA_new MESA_CAU_new MESA_HIS_new NEO NFBC66 NFBC86 orcades PIVUS Raine RS1 RS2 RS3 SAPALDIA_Edinburgh SAPALDIA_Gabriel SHIP-1 SHIP-TREND-0 SHIP-TREND-0_B2 Split Twins_UK UKB_AFR UKB_AMR UKB_EUR UKB_SAS UKHLS VIKING Vis YFS	0.55198	0.939001	0.287995	0.665195	0.611654	578088	578086	573418	421045	0.5164	0.513	0.5438	0.5596	-0.0009	0.0022	-0.0008	-0.0064	0.0009	0.0011	0.0001	0.0031	0.3287	0.04001	4.594e-09	0.03887	BLOC1S5-TXNDC5(nearest), BMP6(PoPs)
ID4	rs9350191	TRUE	rs9350191	30804561	6_19842661_C_T	6	19842661	FEV1	FEV1,FF	T	C	0.867	0.133	-7.835	4.68e-15	-+++-+-+----+--+--+--+---++-+-+--+---+-----+------	ALHS ALSPAC ARIC_AA ARIC_EA B58C BHS CHSAA CHSEA CKB EPIC EXCEED FHS FinnTwin GS20K H2000 HCHS hunt KORA_F4 KORA_S3 Korcula LBC1936 MESA_AFA_new MESA_CAU_new MESA_HIS_new NEO NFBC66 NFBC86 orcades PIVUS QBB Raine RS1 RS2 RS3 SAPALDIA_Edinburgh SAPALDIA_Gabriel SHIP-1 SHIP-TREND-0 SHIP-TREND-0_B2 Split Twins_UK UKB_AFR UKB_AMR UKB_EAS UKB_EUR UKB_SAS UKHLS VIKING Vis YFS	0.846395	0.867991	0.974105	0.782166	0.821429	581867	581865	577197	421045	0.8517	0.8527	0.8483	0.8374	-0.0104	-0.0071	-0.0015	-0.0197	0.0014	0.0016	0.0002	0.0043	4.375e-14	1.223e-05	3.564e-15	4.172e-06	ID4(PoPs,nearest)
CASC15	rs1928168	TRUE	rs1928168	30061609	6_22017738_C_T	6	22017738	FEV1/FVC	PEF,FF	T	C	0.552	0.448	14.174	1.33e-45	++++++-++++++++++++---+++++++++-+-++++++++++++++-+	ALHS ALSPAC ARIC_AA ARIC_EA B58C BHS CHSAA CHSEA CKB EPIC EXCEED FHS FinnTwin GS20K H2000 HCHS hunt KORA_F4 KORA_S3 Korcula LBC1936 MESA_AFA_new MESA_CAU_new MESA_HIS_new NEO NFBC66 NFBC86 orcades PIVUS QBB Raine RS1 RS2 RS3 SAPALDIA_Edinburgh SAPALDIA_Gabriel SHIP-1 SHIP-TREND-0 SHIP-TREND-0_B2 Split Twins_UK UKB_AFR UKB_AMR UKB_EAS UKB_EUR UKB_SAS UKHLS VIKING Vis YFS	0.483591	0.912586	0.79188	0.698892	0.475176	581889	581887	577219	421045	0.5406	0.5447	0.5105	0.4992	0.0033	-0.0038	0.0019	0.0174	0.0009	0.0011	0.0001	0.0031	0.0004159	0.0006001	5.741e-44	1.659e-08	CASC15(nearest), SOX4(PoPs)
CASC15	rs55775505	TRUE	rs196025	31911640	6_22057566_C_T	6	22057566	FEV1	PEF,FEV1,FVC	T	C	0.313	0.313	-7.836	4.66e-15	--?---?-?--++--?-----?+?-----+----++--+-???-?+-++	ALHS ALSPAC ARIC_AA ARIC_EA B58C BHS CHSAA CHSEA CKB EPIC EXCEED FHS FinnTwin GS20K H2000 HCHS hunt KORA_F4 KORA_S3 Korcula LBC1936 MESA_AFA_new MESA_CAU_new MESA_HIS_new NEO NFBC66 NFBC86 orcades PIVUS Raine RS1 RS2 RS3 SAPALDIA_Edinburgh SAPALDIA_Gabriel SHIP-1 SHIP-TREND-0 SHIP-TREND-0_B2 Split Twins_UK UKB_AFR UKB_AMR UKB_EAS UKB_EUR UKB_SAS UKHLS VIKING Vis YFS	0.314632	0.0574004	0.0840517	0.375453	0.235421	581878	581876	577208	421045	0.2917	0.2901	0.3037	0.3076	-0.0077	-0.0084	-0.0004	-0.0187	0.0011	0.0013	0.0001	0.0033	4.368e-13	2.297e-11	0.005699	2.1e-08	CASC15(nearest), PRL(PoPs), SOX4(eQTL)
HDGFL1	rs10946577	FALSE			6_22728496_A_T	6	22728496	FEV1/FVC		A	T	0.736	0.264	8.764	1.88e-18	-++++-+-+++++++++-+++++-++++-+-+++++-+++++++++--+	ALHS ALSPAC ARIC_AA ARIC_EA B58C BHS CHSAA CHSEA CKB EPIC EXCEED FHS FinnTwin GS20K H2000 HCHS hunt KORA_F4 KORA_S3 Korcula LBC1936 MESA_AFA_new MESA_CAU_new MESA_HIS_new NEO NFBC66 NFBC86 orcades PIVUS Raine RS1 RS2 RS3 SAPALDIA_Edinburgh SAPALDIA_Gabriel SHIP-1 SHIP-TREND-0 SHIP-TREND-0_B2 Split Twins_UK UKB_AFR UKB_AMR UKB_EAS UKB_EUR UKB_SAS UKHLS VIKING Vis YFS	0.764583	0.711099	0.544943	0.732068	0.745129	581888	581886	577218	421045	0.7094	0.7031	0.7394	0.7524	0.0043	0.001	0.0012	0.0155	0.001	0.0012	0.0002	0.0036	3.11e-05	0.4046	3.499e-14	1.635e-05	HDGFL1(PoPs,nearest)
HDGFL1	rs4077636	FALSE			6_22749901_A_G	6	22749901	FEV1/FVC		A	G	0.524	0.476	6.565	5.2e-11	++++-++--+-++++++-+-+++++-+--+-+++-+++++++-+++-+-	ALHS ALSPAC ARIC_AA ARIC_EA B58C BHS CHSAA CHSEA CKB EPIC EXCEED FHS FinnTwin GS20K H2000 HCHS hunt KORA_F4 KORA_S3 Korcula LBC1936 MESA_AFA_new MESA_CAU_new MESA_HIS_new NEO NFBC66 NFBC86 orcades PIVUS Raine RS1 RS2 RS3 SAPALDIA_Edinburgh SAPALDIA_Gabriel SHIP-1 SHIP-TREND-0 SHIP-TREND-0_B2 Split Twins_UK UKB_AFR UKB_AMR UKB_EAS UKB_EUR UKB_SAS UKHLS VIKING Vis YFS	0.496444	0.230263	0.732072	0.437729	0.547136	581889	581887	577219	421045	0.5295	0.5354	0.5086	0.492	0.0062	0.0027	0.0012	0.0193	0.0009	0.0011	0.0001	0.0031	4.348e-11	0.01231	2.522e-18	4.602e-10	HDGFL1(PoPs,nearest)
HIST1H4E	rs9393688	TRUE	rs9393688	31911640	6_26207174_A_T	6	26207174	FVC		A	T	0.665	0.335	-6.357	2.05e-10	-+----+	ARIC_AA CKB UKB_AFR UKB_AMR UKB_EAS UKB_EUR UKB_SAS	0.738095	0.976342	0.254235	0.651391	0.585912	464518	464518	464518	365467	0.616	0.607	0.6953	0.7321	-0.0068	-0.0104	0.0003	-0.0196	0.0012	0.0014	0.0002	0.0039	6.037e-09	3.766e-14	0.07292	7.237e-07	HIST1H1PS1(eQTL), HIST1H2AE(eQTL), HIST1H2BE(credible), HIST1H2BF(eQTL), HIST1H2BG(eQTL), HIST1H4A(PoPs), HIST1H4E(nearest)
LINC01012	rs67652222	TRUE	rs34864796	21946350	6_27586220_C_T	6	27586220	FEV1	FEV1,FVC	T	C	0.107	0.107	-13.141	1.91e-39	--+---+-?---+----+-+++-+----+?--------+--++?-?-+--	ALHS ALSPAC ARIC_AA ARIC_EA B58C BHS CHSAA CHSEA CKB EPIC EXCEED FHS FinnTwin GS20K H2000 HCHS hunt KORA_F4 KORA_S3 Korcula LBC1936 MESA_AFA_new MESA_CAU_new MESA_HIS_new NEO NFBC66 NFBC86 orcades PIVUS QBB Raine RS1 RS2 RS3 SAPALDIA_Edinburgh SAPALDIA_Gabriel SHIP-1 SHIP-TREND-0 SHIP-TREND-0_B2 Split Twins_UK UKB_AFR UKB_AMR UKB_EAS UKB_EUR UKB_SAS UKHLS VIKING Vis YFS	0.117676	0.0135	0.000334737	0.0182329	0.00023511	480789	480787	476119	415211	0.1123	0.1119	0.1134	0.1133	-0.0217	-0.0208	-0.0018	-0.0682	0.0017	0.002	0.0002	0.0049	9.708e-39	5.637e-26	1.971e-15	1.103e-43	HIST1H2BN(PoPs), LINC01012(nearest)
TRIM39-RPP21	rs141748163	TRUE	rs2284174	30804561	6_30354416_T_TA	6	30354416	PEF		T	TA	0.857	0.143	15.743	7.73e-56	?+??????????????+-?++?	ALSPAC ARIC_AA B58C EPIC FinnTwin hunt LBC1936 orcades Raine RS1 RS2 RS3 SHIP-1 SHIP-TREND-0 SHIP-TREND-0_B2 Split UKB_AFR UKB_AMR UKB_EAS UKB_EUR UKB_SAS VIKING	0.854569	0.85625	0.99968	0.952109	0.997892	433822	433822	433822	334771	0.8563	0.8563	0.8557	0.8549	0.0212	0.0158	0.0025	0.0792	0.0018	0.0021	0.0002	0.0051	5.293e-33	5.357e-14	5.713e-30	2.667e-54	ABCF1(PoPs), HLA-A(mouse_KO), HLA-E(mouse_KO), HLA-H(mouse_KO), TRIM39-RPP21(nearest)
HLA-C	rs58490916	FALSE			6_31270386_C_T	6	31270386	FEV1	FEV1,FVC	T	C	0.919	0.081	6.762	1.36e-11	??????????????????????????+????	ALHS ARIC_EA CHSEA EPIC EXCEED FHS FinnTwin GS20K KORA_F4 KORA_S3 Korcula LBC1936 MESA_CAU_new NEO NFBC66 NFBC86 orcades PIVUS Raine SAPALDIA_Edinburgh SAPALDIA_Gabriel SHIP-1 SHIP-TREND-0 SHIP-TREND-0_B2 Split Twins_UK UKB_EUR UKHLS VIKING Vis YFS	0.918936	0.909542	0.984007	0.956568	0.974336	464518	464518	464518	365467	0.9232	0.9236	0.92	0.9194	0.0112	0.0109	0.0007	0.0064	0.0021	0.0025	0.0003	0.0064	1.237e-07	1.487e-05	0.007231	0.3193	HLA-C(mouse_KO,nearest), NFKBIL1(PoPs)
HLA-B	rs73406410	FALSE			6_31321501_A_G	6	31321501	PEF		A	G	0.89	0.11	-8.119	4.69e-16	+++-	ARIC_AA UKB_AFR UKB_AMR UKB_EUR	0.894365	0.687847	0.781957	0.735148	0.681404	581876	581874	577206	421045	0.8445	0.8429	0.8581	0.8743	-0.0115	-0.0076	-0.002	-0.039	0.0013	0.0016	0.0002	0.0048	4.275e-18	1.073e-06	6.288e-23	7.727e-16	HLA-B(mouse_KO,nearest), DDX39B(PoPs)
HLA-B	rs73390208	FALSE			6_31326131_C_T	6	31326131	FEV1/FVC		T	C	0.269	0.269	10.76	5.35e-27	+	UKB_EUR	0.268972	0.514853	0.422552	0.450629	0.497353	570329	570327	565659	421045	0.3153	0.3186	0.2995	0.2841	0.0034	-0.0008	0.0014	0.0188	0.001	0.0012	0.0001	0.0034	0.0007059	0.4783	2.707e-22	3.978e-08	GPANK1(mouse_KO), HLA-B(nearest), LTA(mouse_KO), NFKBIL1(PoPs)
TNXB	rs555613989	FALSE			6_32016876_A_T	6	32016876	FEV1/FVC	PEF,FF	A	T	0.003	0.003	10.387	2.85e-25	+	UKB_EUR	0.0029766	3.15433e-05	2.38203e-05	0.000109322	9.184e-06	320656	320656	320656	320656	0.003	0.003	0.003	0.003	0.0644	-0.0523	0.029	0.3736	0.0209	0.0249	0.0026	0.0596	0.002053	0.03531	1.279e-28	3.656e-10	AGER(WES,PoPs), C2(rare_disease), C4A(rare_disease), C4B(rare_disease), MPIG6B(mouse_KO), SKIV2L(rare_disease), TNXB(nearest)
TNXB	rs146970659	FALSE			6_32038881_C_T	6	32038881	FEV1/FVC		T	C	0.0059	0.0059	14.418	3.98e-47	??????????????????????????????????????????+?????	ALHS ALSPAC ARIC_AA ARIC_EA B58C BHS CHSAA CHSEA CKB EPIC EXCEED FHS FinnTwin GS20K H2000 HCHS KORA_F4 KORA_S3 Korcula LBC1936 MESA_AFA_new MESA_CAU_new MESA_HIS_new NEO NFBC66 NFBC86 orcades PIVUS Raine RS1 RS2 RS3 SAPALDIA_Edinburgh SAPALDIA_Gabriel SHIP-1 SHIP-TREND-0 SHIP-TREND-0_B2 Split Twins_UK UKB_AFR UKB_AMR UKB_EAS UKB_EUR UKB_SAS UKHLS VIKING Vis YFS	0.00593864	0.000355789	1.37907e-05	0.00010792	7.3472e-06	320656	320656	320656	320656	0.0059	0.0059	0.0059	0.0059	0.0456	-0.073	0.0261	0.3509	0.0147	0.0175	0.0018	0.042	0.00197	3.167e-05	8.026e-46	6.856e-17	AGER(WES,PoPs), C2(rare_disease), C4A(rare_disease), C4B(rare_disease), SKIV2L(rare_disease), TNXB(nearest)
AGER	rs2070600	TRUE	rs2070600	20010834	6_32151443_C_T	6	32151443	FEV1/FVC	PEF,FEV1,FVC,FF	T	C	0.0825	0.0825	32.205	1.5e-227	++++++++++++++++?+-+-+++++++++++-++++++-++++++++-+	ALHS ALSPAC ARIC_AA ARIC_EA B58C BHS CHSAA CHSEA CKB EPIC EXCEED FHS FinnTwin GS20K H2000 HCHS hunt KORA_F4 KORA_S3 Korcula LBC1936 MESA_AFA_new MESA_CAU_new MESA_HIS_new NEO NFBC66 NFBC86 orcades PIVUS QBB Raine RS1 RS2 RS3 SAPALDIA_Edinburgh SAPALDIA_Gabriel SHIP-1 SHIP-TREND-0 SHIP-TREND-0_B2 Split Twins_UK UKB_AFR UKB_AMR UKB_EAS UKB_EUR UKB_SAS UKHLS VIKING Vis YFS	0.063802	0.00236574	0.176151	0.00839886	0.0588993	565535	565533	560865	404691	0.1316	0.136	0.0932	0.0632	0.009	-0.0158	0.0079	0.0897	0.0016	0.0019	0.0003	0.0065	4.236e-08	1.199e-16	4.57e-195	3.195e-43	AGER(WES,PoPs,nearest), C2(rare_disease), C4A(rare_disease), C4B(rare_disease), SKIV2L(rare_disease)
HLA-DQA1	rs9271346	FALSE			6_32583468_C_T	6	32583468	FVC		T	C	0.815	0.185	-8.171	3.06e-16	??+?????-?????-+????-?+????????????????-++--????	ALHS ALSPAC ARIC_AA ARIC_EA B58C BHS CHSAA CHSEA CKB EPIC EXCEED FHS FinnTwin GS20K H2000 HCHS KORA_F4 KORA_S3 Korcula LBC1936 MESA_AFA_new MESA_CAU_new MESA_HIS_new NEO NFBC66 NFBC86 orcades PIVUS Raine RS1 RS2 RS3 SAPALDIA_Edinburgh SAPALDIA_Gabriel SHIP-1 SHIP-TREND-0 SHIP-TREND-0_B2 Split Twins_UK UKB_AFR UKB_AMR UKB_EAS UKB_EUR UKB_SAS UKHLS VIKING Vis YFS	0.82229	0.774116	0.735219	0.879403	0.627481	464518	464518	464518	365467	0.8066	0.8055	0.8148	0.8189	-0.0127	-0.0143	-0.0005	-0.0097	0.0013	0.0015	0.0002	0.0045	4.431e-22	1.2e-20	0.003468	0.03233	TAP2(rare_disease,PoPs), AGER(WES), HLA-DQA1(nearest), TAP1(rare_disease)
HLA-DQA1	rs9271383	TRUE	rs114544105	26423011	6_32587391_C_T	6	32587391	FEV1/FVC	FEV1,FF	T	C	0.577	0.423	-12.095	1.12e-33	-	UKB_EUR	0.57646	0.492	0.448404	0.584719	0.453529	440194	440194	440194	352689	0.5569	0.5551	0.5664	0.573	-0.0124	-0.0118	-0.0012	-0.0262	0.0011	0.0012	0.0001	0.0036	2.944e-31	2.186e-21	2.293e-15	3.091e-13	TAP1(rare_disease,PoPs), AGER(WES), HLA-DQA1(nearest), TAP2(rare_disease)
HLA-DQB1	rs9275211	TRUE	rs9275156	31911640	6_32657844_C_T	6	32657844	PEF		T	C	0.785	0.215	6.437	1.22e-10	+	UKB_EUR NA UKB_EUR	0.784613	0.866153	0.787904	0.725529	0.65652	452972	452972	452972	365467	0.7778	0.7777	0.7796	0.7795	0.0052	0.0014	0.0014	0.0249	0.0013	0.0015	0.0002	0.0042	3.571e-05	0.3256	1.639e-16	2.965e-09	TAP1(rare_disease,PoPs), HLA-DQB1(nearest), TAP2(rare_disease)
COL11A2	rs9277934	FALSE			6_33153528_C_T	6	33153528	PEF		T	C	0.315	0.315	-7.932	2.15e-15	----	ARIC_AA UKB_AFR UKB_AMR UKB_EUR	0.313038	0.426662	0.227302	0.379199	0.385246	561745	561743	557075	404691	0.302	0.2997	0.3096	0.3103	-0.0044	-0.0041	-0.0004	-0.0227	0.001	0.0012	0.0001	0.0033	1.226e-05	0.0004377	0.01228	8.298e-12	COL11A2(PoPs,nearest), TAP1(rare_disease), TAP2(rare_disease), TAPBP(rare_disease)
HMGA1	rs75104038	TRUE	rs9689096	30804560	6_34190104_A_G	6	34190104	FEV1	FEV1,FVC	A	G	0.0597	0.0597	6.881	5.95e-12	++++---++++-++++---+-+++--+++++	ALHS ARIC_EA CHSEA EPIC EXCEED FHS FinnTwin GS20K KORA_F4 KORA_S3 Korcula LBC1936 MESA_CAU_new NEO NFBC66 NFBC86 orcades PIVUS Raine SAPALDIA_Edinburgh SAPALDIA_Gabriel SHIP-1 SHIP-TREND-0 SHIP-TREND-0_B2 Split Twins_UK UKB_EUR UKHLS VIKING Vis YFS	0.0607638	0.0256284	0.0159333	0.0691635	0.0418956	581870	581868	577200	421045	0.0558	0.0555	0.0579	0.0587	0.0131	0.0147	0.0006	0.017	0.0021	0.0025	0.0003	0.0065	6.264e-10	3.703e-09	0.03989	0.009295	MLN(eQTL,pQTL), BAK1(eQTL), HMGA1(nearest), IP6K3(eQTL), ITPR3(eQTL), LEMD2(eQTL), RPS10(PoPs), SMIM29(WES)
SNRPC	rs9689160	FALSE			6_34749849_A_G	6	34749849	FVC		A	G	0.744	0.256	7.614	2.66e-14	+++++---++-	ARIC_AA CKB H2000 HCHS MESA_AFA_new MESA_HIS_new UKB_AFR UKB_AMR UKB_EAS UKB_EUR UKB_SAS	0.733022	0.314187	0.849554	0.647646	0.792487	581889	581887	577219	421045	0.7382	0.7401	0.7296	0.7273	0.0067	0.0094	-0.0001	0.0103	0.001	0.0012	0.0002	0.0034	1.516e-10	2.382e-14	0.6103	0.002679	MLN(eQTL,pQTL), C6orf106(PoPs), SCUBE3(WES), SNRPC(nearest)
ANKS1A	rs72896231	FALSE			6_34979247_C_T	6	34979247	FEV1		T	C	0.117	0.117	-8.016	1.09e-15	-+--++----+-----++-+--+++-+---+-	ALHS ARIC_EA CHSEA EPIC EXCEED FHS FinnTwin GS20K hunt KORA_F4 KORA_S3 Korcula LBC1936 MESA_CAU_new NEO NFBC66 NFBC86 orcades PIVUS Raine SAPALDIA_Edinburgh SAPALDIA_Gabriel SHIP-1 SHIP-TREND-0 SHIP-TREND-0_B2 Split Twins_UK UKB_EUR UKHLS VIKING Vis YFS	0.119875	0.218595	0.13587	0.151179	0.0669789	581880	581878	577210	421045	0.1216	0.1216	0.1208	0.1203	-0.0111	-0.0099	-0.0011	-0.0138	0.0014	0.0016	0.0002	0.0047	1.698e-15	1.34e-09	2.166e-08	0.003284	SCUBE3(WES,PoPs), ANKS1A(nearest)
SUPT3H	rs634789	FALSE			6_44896518_C_G	6	44896518	FVC	FEV1,FVC	C	G	0.538	0.462	-5.994	2.05e-09	??-?????-?????-?????????????????????????-+--+????	ALHS ALSPAC ARIC_AA ARIC_EA B58C BHS CHSAA CHSEA CKB EPIC EXCEED FHS FinnTwin GS20K H2000 HCHS hunt KORA_F4 KORA_S3 Korcula LBC1936 MESA_AFA_new MESA_CAU_new MESA_HIS_new NEO NFBC66 NFBC86 orcades PIVUS Raine RS1 RS2 RS3 SAPALDIA_Edinburgh SAPALDIA_Gabriel SHIP-1 SHIP-TREND-0 SHIP-TREND-0_B2 Split Twins_UK UKB_AFR UKB_AMR UKB_EAS UKB_EUR UKB_SAS UKHLS VIKING Vis YFS	0.505735	0.80049	0.697938	0.588624	0.558942	423840	423840	423840	336335	0.553	0.5591	0.5225	0.5108	-0.0052	-0.0072	0.0001	-0.0081	0.0011	0.0013	0.0002	0.0036	1.65e-06	1.319e-08	0.5205	0.02408	SUPT3H(PoPs,nearest), RUNX2(rare_disease)
RUNX2	rs12202314	TRUE	rs12202314	30804560	6_45530471_C_T	6	45530471	FEV1/FVC		T	C	0.684	0.316	-9.185	4.1e-20	--+---+-----------++--+-+----++++++-----++------+-	ALHS ALSPAC ARIC_AA ARIC_EA B58C BHS CHSAA CHSEA CKB EPIC EXCEED FHS FinnTwin GS20K H2000 HCHS hunt KORA_F4 KORA_S3 Korcula LBC1936 MESA_AFA_new MESA_CAU_new MESA_HIS_new NEO NFBC66 NFBC86 orcades PIVUS QBB Raine RS1 RS2 RS3 SAPALDIA_Edinburgh SAPALDIA_Gabriel SHIP-1 SHIP-TREND-0 SHIP-TREND-0_B2 Split Twins_UK UKB_AFR UKB_AMR UKB_EAS UKB_EUR UKB_SAS UKHLS VIKING Vis YFS	0.675286	0.411249	0.779844	0.666677	0.792954	581889	581887	577219	421045	0.682	0.6844	0.6747	0.674	-0.0024	0.0027	-0.0013	-0.0102	0.001	0.0012	0.0001	0.0033	0.01475	0.01919	2.381e-20	0.001825	RUNX2(rare_disease,PoPs,nearest)
PAQR8	rs655113	FALSE			6_52269151_C_T	6	52269151	PEF	PEF,FF	T	C	0.706	0.294	6.725	1.76e-11	++++-++-++--+-+++-++--	ALSPAC ARIC_AA B58C EPIC FinnTwin hunt LBC1936 orcades Raine RS1 RS2 RS3 SHIP-1 SHIP-TREND-0 SHIP-TREND-0_B2 Split UKB_AFR UKB_AMR UKB_EAS UKB_EUR UKB_SAS VIKING	0.698479	0.941549	0.927674	0.774311	0.785624	581888	581886	577218	421045	0.7168	0.7184	0.7077	0.7059	0.0052	0.003	0.0007	0.0214	0.0011	0.0013	0.0002	0.0034	1.772e-06	0.01931	7.699e-06	2.093e-10	MCM3(PoPs), PAQR8(nearest)
HMGCLL1	rs11753370	FALSE			6_55531243_A_G	6	55531243	FVC		A	G	0.684	0.316	-6.91	4.86e-12	-----++-----+-----++-----+-++---+----------+-+-+++	ALHS ALSPAC ARIC_AA ARIC_EA B58C BHS CHSAA CHSEA CKB EPIC EXCEED FHS FinnTwin GS20K H2000 HCHS hunt KORA_F4 KORA_S3 Korcula LBC1936 MESA_AFA_new MESA_CAU_new MESA_HIS_new NEO NFBC66 NFBC86 orcades PIVUS QBB Raine RS1 RS2 RS3 SAPALDIA_Edinburgh SAPALDIA_Gabriel SHIP-1 SHIP-TREND-0 SHIP-TREND-0_B2 Split Twins_UK UKB_AFR UKB_AMR UKB_EAS UKB_EUR UKB_SAS UKHLS VIKING Vis YFS	0.701567	0.623531	0.578604	0.699995	0.706881	581889	581887	577219	421045	0.6786	0.6758	0.6902	0.7008	-0.0051	-0.0077	0.0001	-0.0108	0.001	0.0011	0.0001	0.0033	1.847e-07	7.875e-12	0.3576	0.00111	BMP5(PoPs), HMGCLL1(nearest)
RNU6-71P	rs115830429	FALSE			6_56239955_A_G	6	56239955	FEV1/FVC		A	G	0.0235	0.0235	7.916	2.46e-15	-+-+++?-?-+-++-+++++--++-++-++++-+++--+--+-?+-++-?	ALHS ALSPAC ARIC_AA ARIC_EA B58C BHS CHSAA CHSEA CKB EPIC EXCEED FHS FinnTwin GS20K H2000 HCHS hunt KORA_F4 KORA_S3 Korcula LBC1936 MESA_AFA_new MESA_CAU_new MESA_HIS_new NEO NFBC66 NFBC86 orcades PIVUS QBB Raine RS1 RS2 RS3 SAPALDIA_Edinburgh SAPALDIA_Gabriel SHIP-1 SHIP-TREND-0 SHIP-TREND-0_B2 Split Twins_UK UKB_AFR UKB_AMR UKB_EAS UKB_EUR UKB_SAS UKHLS VIKING Vis YFS	0.0244452	0.00248403	0.000639386	0.0343102	0.0119438	494648	494646	489978	418573	0.0265	0.026	0.0254	0.0235	0.018	0.0081	0.0033	0.0579	0.0033	0.004	0.0005	0.0102	7.659e-08	0.04205	7.277e-13	1.414e-08	DST(PoPs), RNU6-71P(nearest)
RNU6-71P	rs2894837	TRUE	rs2894837	30804560	6_56336406_A_G	6	56336406	PEF	PEF,FEV1,FF	A	G	0.631	0.369	7.541	4.65e-14	+-++-+++-+++--++---+++	ALSPAC ARIC_AA B58C EPIC FinnTwin hunt LBC1936 orcades Raine RS1 RS2 RS3 SHIP-1 SHIP-TREND-0 SHIP-TREND-0_B2 Split UKB_AFR UKB_AMR UKB_EAS UKB_EUR UKB_SAS VIKING	0.636233	0.341779	0.698734	0.541655	0.603726	581889	581887	577219	421045	0.6458	0.6481	0.6368	0.6351	0.007	0.0058	0.0008	0.0249	0.001	0.0011	0.0001	0.0032	2.754e-13	2.161e-07	1.089e-09	5.25e-15	DST(PoPs), RNU6-71P(nearest)
PRIM2	rs62401580	FALSE			6_57348149_C_T	6	57348149	FEV1/FVC		T	C	0.2	0.2	-6.001	1.97e-09	--++---+--------+++--+--++----+-+-++--+--+	ALHS ALSPAC ARIC_EA B58C BHS CHSEA EPIC EXCEED FHS FinnTwin GS20K H2000 HCHS hunt KORA_F4 KORA_S3 Korcula LBC1936 MESA_CAU_new MESA_HIS_new NEO NFBC66 NFBC86 orcades PIVUS Raine RS1 RS2 RS3 SAPALDIA_Edinburgh SAPALDIA_Gabriel SHIP-1 SHIP-TREND-0 SHIP-TREND-0_B2 Split Twins_UK UKB_AMR UKB_EUR UKB_SAS UKHLS VIKING Vis	0.205071	0.0339062	0.0374041	0.102752	0.105549	578920	578918	574250	418225	0.1911	0.1903	0.197	0.1989	-0.0067	-0.0033	-0.0011	-0.0238	0.0013	0.0015	0.0002	0.0039	1.916e-07	0.02968	2.51e-10	1.323e-09	PRIM2(PoPs,nearest)
NONE	rs371314329	FALSE			6_62100477_A_T	6	62100477	PEF	PEF,FF	A	T	0.804	0.196	6.498	8.11e-11	?+??????????????++++-?	ALSPAC ARIC_AA B58C EPIC FinnTwin hunt LBC1936 orcades Raine RS1 RS2 RS3 SHIP-1 SHIP-TREND-0 SHIP-TREND-0_B2 Split UKB_AFR UKB_AMR UKB_EAS UKB_EUR UKB_SAS VIKING	0.807085	0.54883	0.95596	0.87818	0.913301	423840	423840	423840	336335	0.8053	0.806	0.7976	0.8022	0.0074	0.0045	0.0011	0.0308	0.0016	0.0018	0.0002	0.0047	2.4e-06	0.0142	1.503e-08	6.039e-11	MTRNR2L9(PoPs), NONE(nearest)
KCNQ5	rs9360621	TRUE	rs141651520	28166213	6_73655333_A_G	6	73655333	FEV1/FVC	PEF,FF	A	G	0.8	0.2	-12.375	3.56e-35	---++-+------+----+--+---------------+--+--+-----+	ALHS ALSPAC ARIC_AA ARIC_EA B58C BHS CHSAA CHSEA CKB EPIC EXCEED FHS FinnTwin GS20K H2000 HCHS hunt KORA_F4 KORA_S3 Korcula LBC1936 MESA_AFA_new MESA_CAU_new MESA_HIS_new NEO NFBC66 NFBC86 orcades PIVUS QBB Raine RS1 RS2 RS3 SAPALDIA_Edinburgh SAPALDIA_Gabriel SHIP-1 SHIP-TREND-0 SHIP-TREND-0_B2 Split Twins_UK UKB_AFR UKB_AMR UKB_EAS UKB_EUR UKB_SAS UKHLS VIKING Vis YFS	0.800401	0.890434	0.742354	0.915131	0.804907	581886	581884	577216	421045	0.7985	0.7981	0.7996	0.8043	-0.0022	0.0055	-0.002	-0.0264	0.0011	0.0013	0.0002	0.0038	0.05238	3.277e-05	1.667e-34	5.747e-12	KCNQ5(eQTL,PoPs,nearest)
LOC101928540	rs12209223	FALSE			6_76164589_A_C	6	76164589	FEV1	FEV1,FVC	A	C	0.0993	0.0993	-7.305	2.77e-13	++-+---------+-------++++--+---++++++------+-+--++	ALHS ALSPAC ARIC_AA ARIC_EA B58C BHS CHSAA CHSEA CKB EPIC EXCEED FHS FinnTwin GS20K H2000 HCHS hunt KORA_F4 KORA_S3 Korcula LBC1936 MESA_AFA_new MESA_CAU_new MESA_HIS_new NEO NFBC66 NFBC86 orcades PIVUS QBB Raine RS1 RS2 RS3 SAPALDIA_Edinburgh SAPALDIA_Gabriel SHIP-1 SHIP-TREND-0 SHIP-TREND-0_B2 Split Twins_UK UKB_AFR UKB_AMR UKB_EAS UKB_EUR UKB_SAS UKHLS VIKING Vis YFS	0.101802	0.00834365	0.0739933	0.0743984	0.063484	581885	581883	577215	421045	0.1017	0.102	0.1017	0.1003	-0.0101	-0.0106	-0.0005	-0.0172	0.0015	0.0018	0.0002	0.0051	3.656e-11	3.248e-09	0.03858	0.0008065	MYO6(eQTL,mouse_KO), COL12A1(PoPs), FILIP1(eQTL), LOC101928540(nearest)
BCKDHB	rs723588	FALSE			6_81056634_C_T	6	81056634	FVC		T	C	0.835	0.165	-6.185	6.22e-10	-+-+--+++---+-----+--------++?-+++--++----+-----+-	ALHS ALSPAC ARIC_AA ARIC_EA B58C BHS CHSAA CHSEA CKB EPIC EXCEED FHS FinnTwin GS20K H2000 HCHS hunt KORA_F4 KORA_S3 Korcula LBC1936 MESA_AFA_new MESA_CAU_new MESA_HIS_new NEO NFBC66 NFBC86 orcades PIVUS QBB Raine RS1 RS2 RS3 SAPALDIA_Edinburgh SAPALDIA_Gabriel SHIP-1 SHIP-TREND-0 SHIP-TREND-0_B2 Split Twins_UK UKB_AFR UKB_AMR UKB_EAS UKB_EUR UKB_SAS UKHLS VIKING Vis YFS	0.857544	0.660279	0.750959	0.854539	0.636417	570332	570330	565662	421045	0.8182	0.8163	0.8364	0.8488	-0.0052	-0.0069	0.0001	0.0173	0.0012	0.0014	0.0002	0.0043	1.864e-05	1.204e-06	0.4509	5.478e-05	BCKDHB(PoPs,nearest)
BACH2	rs1504215	TRUE	rs58453446	31911640	6_91006227_A_G	6	91006227	FEV1/FVC		A	G	0.289	0.289	6.74	1.58e-11	---++++-+--+++++++-++-++++-+---+++--+-++++++++-+++	ALHS ALSPAC ARIC_AA ARIC_EA B58C BHS CHSAA CHSEA CKB EPIC EXCEED FHS FinnTwin GS20K H2000 HCHS hunt KORA_F4 KORA_S3 Korcula LBC1936 MESA_AFA_new MESA_CAU_new MESA_HIS_new NEO NFBC66 NFBC86 orcades PIVUS QBB Raine RS1 RS2 RS3 SAPALDIA_Edinburgh SAPALDIA_Gabriel SHIP-1 SHIP-TREND-0 SHIP-TREND-0_B2 Split Twins_UK UKB_AFR UKB_AMR UKB_EAS UKB_EUR UKB_SAS UKHLS VIKING Vis YFS	0.349599	0.0664176	0.0111504	0.302316	0.21722	581879	581877	577209	421045	0.3379	0.3373	0.3401	0.3418	0.0041	0.0005	0.0011	0.0058	0.0011	0.0013	0.0001	0.0032	0.000124	0.6827	7.506e-14	0.07156	BACH2(mouse_KO,PoPs,nearest)
LINC00577	rs1475120	FALSE			6_105389953_A_G	6	105389953	FVC	FEV1,FVC	A	G	0.565	0.435	7.141	9.3e-13	-+++++-+++++-+--++-++-+-+++--++-+-++++++++--+-++--	ALHS ALSPAC ARIC_AA ARIC_EA B58C BHS CHSAA CHSEA CKB EPIC EXCEED FHS FinnTwin GS20K H2000 HCHS hunt KORA_F4 KORA_S3 Korcula LBC1936 MESA_AFA_new MESA_CAU_new MESA_HIS_new NEO NFBC66 NFBC86 orcades PIVUS QBB Raine RS1 RS2 RS3 SAPALDIA_Edinburgh SAPALDIA_Gabriel SHIP-1 SHIP-TREND-0 SHIP-TREND-0_B2 Split Twins_UK UKB_AFR UKB_AMR UKB_EAS UKB_EUR UKB_SAS UKHLS VIKING Vis YFS	0.546775	0.274285	0.681717	0.562573	0.596195	581889	581887	577219	421045	0.5686	0.5719	0.552	0.54	0.0063	0.0076	0.0002	0.0175	0.0009	0.0011	0.0001	0.0031	9.776e-12	1.415e-12	0.1587	1.224e-08	BVES(PoPs), LINC00577(nearest)
FOXO3	rs2153960	FALSE			6_108988184_A_G	6	108988184	FEV1/FVC		A	G	0.7	0.3	6.401	1.54e-10	+++++-+++-+-+++++++++--+++-++-+-+-+-+--++-++-+-++	ALHS ALSPAC ARIC_AA ARIC_EA B58C BHS CHSAA CHSEA CKB EPIC EXCEED FHS FinnTwin GS20K H2000 HCHS hunt KORA_F4 KORA_S3 Korcula LBC1936 MESA_AFA_new MESA_CAU_new MESA_HIS_new NEO NFBC66 NFBC86 orcades PIVUS Raine RS1 RS2 RS3 SAPALDIA_Edinburgh SAPALDIA_Gabriel SHIP-1 SHIP-TREND-0 SHIP-TREND-0_B2 Split Twins_UK UKB_AFR UKB_AMR UKB_EAS UKB_EUR UKB_SAS UKHLS VIKING Vis YFS	0.711891	0.099243	0.68766	0.726948	0.511358	581889	581887	577219	421045	0.6984	0.6991	0.6971	0.6943	-0.0004	-0.004	0.0009	0.0103	0.001	0.0012	0.0001	0.0034	0.706	0.000507	3.548e-09	0.002197	FOXO3(PoPs,nearest), LINC00222(eQTL)
ARMC2	rs2768551	TRUE	rs2768551	21946350	6_109270656_A_G	6	109270656	FEV1/FVC	PEF,FEV1,FF	A	G	0.199	0.199	-17.227	1.65e-66	------------------------------+---+---------------	ALHS ALSPAC ARIC_AA ARIC_EA B58C BHS CHSAA CHSEA CKB EPIC EXCEED FHS FinnTwin GS20K H2000 HCHS hunt KORA_F4 KORA_S3 Korcula LBC1936 MESA_AFA_new MESA_CAU_new MESA_HIS_new NEO NFBC66 NFBC86 orcades PIVUS QBB Raine RS1 RS2 RS3 SAPALDIA_Edinburgh SAPALDIA_Gabriel SHIP-1 SHIP-TREND-0 SHIP-TREND-0_B2 Split Twins_UK UKB_AFR UKB_AMR UKB_EAS UKB_EUR UKB_SAS UKHLS VIKING Vis YFS	0.187657	0.143246	0.275895	0.205861	0.174473	581879	581877	577209	421045	0.2056	0.2074	0.1952	0.1877	-0.014	-0.0064	-0.0028	-0.0318	0.0011	0.0013	0.0002	0.0039	4.005e-35	8.972e-07	2.72e-60	3.2e-16	MICAL1(WES,WES), PPIL6(WES,WES), ARMC2(nearest), SESN1(PoPs)
NT5DC1	rs9387383	FALSE			6_116422847_A_G	6	116422847	FEV1/FVC		A	G	0.558	0.442	-6.185	6.19e-10	+-+--+---++-+---+-+---+---+---+--++-----------+--	ALHS ALSPAC ARIC_AA ARIC_EA B58C BHS CHSAA CHSEA CKB EPIC EXCEED FHS FinnTwin GS20K H2000 HCHS hunt KORA_F4 KORA_S3 Korcula LBC1936 MESA_AFA_new MESA_CAU_new MESA_HIS_new NEO NFBC66 NFBC86 orcades PIVUS Raine RS1 RS2 RS3 SAPALDIA_Edinburgh SAPALDIA_Gabriel SHIP-1 SHIP-TREND-0 SHIP-TREND-0_B2 Split Twins_UK UKB_AFR UKB_AMR UKB_EAS UKB_EUR UKB_SAS UKHLS VIKING Vis YFS	0.526451	0.300952	0.755326	0.53198	0.715793	581884	581882	577214	421045	0.5663	0.5692	0.5441	0.5263	-0.0048	-0.0023	-0.0008	0.0053	0.0009	0.0011	0.0001	0.0031	3.785e-07	0.03479	5.285e-10	0.08699	DSE(PoPs), NT5DC1(nearest), TSPYL1(rare_disease)
RFX6	rs6907088	FALSE			6_117258674_C_T	6	117258674	FEV1	FEV1,FF	T	C	0.671	0.329	8.879	6.75e-19	++-++-++++++-+-+++--++++++-+-?-++++++++-+--0+++---	ALHS ALSPAC ARIC_AA ARIC_EA B58C BHS CHSAA CHSEA CKB EPIC EXCEED FHS FinnTwin GS20K H2000 HCHS hunt KORA_F4 KORA_S3 Korcula LBC1936 MESA_AFA_new MESA_CAU_new MESA_HIS_new NEO NFBC66 NFBC86 orcades PIVUS QBB Raine RS1 RS2 RS3 SAPALDIA_Edinburgh SAPALDIA_Gabriel SHIP-1 SHIP-TREND-0 SHIP-TREND-0_B2 Split Twins_UK UKB_AFR UKB_AMR UKB_EAS UKB_EUR UKB_SAS UKHLS VIKING Vis YFS	0.680983	0.714472	0.604894	0.798776	0.555128	570342	570340	565672	421045	0.668	0.6663	0.6745	0.6833	0.0084	0.0067	0.0009	0.0174	0.001	0.0011	0.0001	0.0033	3e-18	2.909e-09	1.747e-11	1.036e-07	FAM162B(PoPs), RFX6(nearest), RSPH4A(rare_disease)
GJA1	rs10456939	FALSE			6_121764006_A_G	6	121764006	FEV1/FVC	FEV1,FF	A	G	0.215	0.215	6.951	3.63e-12	++++-+--+++-+++++++-+-+++-+--+-++-++++++++++++-+-+	ALHS ALSPAC ARIC_AA ARIC_EA B58C BHS CHSAA CHSEA CKB EPIC EXCEED FHS FinnTwin GS20K H2000 HCHS hunt KORA_F4 KORA_S3 Korcula LBC1936 MESA_AFA_new MESA_CAU_new MESA_HIS_new NEO NFBC66 NFBC86 orcades PIVUS QBB Raine RS1 RS2 RS3 SAPALDIA_Edinburgh SAPALDIA_Gabriel SHIP-1 SHIP-TREND-0 SHIP-TREND-0_B2 Split Twins_UK UKB_AFR UKB_AMR UKB_EAS UKB_EUR UKB_SAS UKHLS VIKING Vis YFS	0.248459	0.205701	0.0338875	0.214618	0.218618	581886	581884	577216	421045	0.2439	0.2433	0.2469	0.2451	0.0071	0.0045	0.0011	0.0125	0.0011	0.0013	0.0002	0.0035	6.343e-10	0.0008346	2.348e-12	0.0004047	GJA1(PoPs,nearest)
MIR588	rs1490384	TRUE	rs11759026	30061609	6_126851160_C_T	6	126851160	FVC	FEV1,FVC	T	C	0.571	0.429	8.403	4.35e-17	++++++-+-+-+-+++++--+--+-+++-+++---+++++--+++-++++	ALHS ALSPAC ARIC_AA ARIC_EA B58C BHS CHSAA CHSEA CKB EPIC EXCEED FHS FinnTwin GS20K H2000 HCHS hunt KORA_F4 KORA_S3 Korcula LBC1936 MESA_AFA_new MESA_CAU_new MESA_HIS_new NEO NFBC66 NFBC86 orcades PIVUS QBB Raine RS1 RS2 RS3 SAPALDIA_Edinburgh SAPALDIA_Gabriel SHIP-1 SHIP-TREND-0 SHIP-TREND-0_B2 Split Twins_UK UKB_AFR UKB_AMR UKB_EAS UKB_EUR UKB_SAS UKHLS VIKING Vis YFS	0.498787	0.152354	0.960358	0.590064	0.715574	581886	581884	577216	421045	0.5152	0.5167	0.5067	0.4991	0.006	0.0104	-0.0006	0.0054	0.001	0.0012	0.0001	0.0031	2.115e-09	5.588e-19	3.177e-06	0.07914	CENPW(PoPs), MIR588(nearest)
MIR588	rs565692119	FALSE			6_127094993_C_CA	6	127094993	FEV1/FVC		CA	C	0.289	0.289	-5.852	4.85e-09	??-?????-????????????????????????????????++---????	ALHS ALSPAC ARIC_AA ARIC_EA B58C BHS CHSAA CHSEA CKB EPIC EXCEED FHS FinnTwin GS20K H2000 HCHS hunt KORA_F4 KORA_S3 Korcula LBC1936 MESA_AFA_new MESA_CAU_new MESA_HIS_new NEO NFBC66 NFBC86 orcades PIVUS QBB Raine RS1 RS2 RS3 SAPALDIA_Edinburgh SAPALDIA_Gabriel SHIP-1 SHIP-TREND-0 SHIP-TREND-0_B2 Split Twins_UK UKB_AFR UKB_AMR UKB_EAS UKB_EUR UKB_SAS UKHLS VIKING Vis YFS	0.231942	0.0802484	0.482454	0.24471	0.354424	420050	420050	420050	336335	0.3282	0.3384	0.2675	0.2348	-0.0009	0.0026	-0.001	-0.0025	0.0012	0.0014	0.0002	0.0042	0.4561	0.06094	3.573e-09	0.5562	CENPW(eQTL), MIR588(nearest), RSPO3(PoPs)
LAMA2	rs9321170	FALSE			6_129822837_A_G	6	129822837	FVC		A	G	0.72	0.28	6.896	5.34e-12	-+--+--+++++++++++++---+++-+--++--+--+-+-++++--	ALHS ALSPAC ARIC_AA ARIC_EA B58C BHS CHSAA CHSEA EPIC EXCEED FHS FinnTwin GS20K H2000 HCHS hunt KORA_F4 KORA_S3 Korcula LBC1936 MESA_AFA_new MESA_CAU_new MESA_HIS_new NEO NFBC66 NFBC86 orcades PIVUS Raine RS1 RS2 RS3 SAPALDIA_Edinburgh SAPALDIA_Gabriel SHIP-1 SHIP-TREND-0 SHIP-TREND-0_B2 Split Twins_UK UKB_AFR UKB_AMR UKB_EUR UKB_SAS UKHLS VIKING Vis YFS	0.727373	0.401623	0.637385	0.710146	0.705936	581888	581886	577218	421045	0.6896	0.6863	0.7056	0.7124	0.0055	0.0079	-0.0002	0.003	0.001	0.0012	0.0001	0.0034	3.51e-08	5.984e-12	0.1037	0.3758	LAMA2(rare_disease,PoPs,nearest)
L3MBTL3	rs7756733	FALSE			6_130398013_A_T	6	130398013	FEV1/FVC		A	T	0.587	0.413	5.908	3.46e-09	-+--+++++-+--++--+-+---+++-++?-++--++++-+++++++--+	ALHS ALSPAC ARIC_AA ARIC_EA B58C BHS CHSAA CHSEA CKB EPIC EXCEED FHS FinnTwin GS20K H2000 HCHS hunt KORA_F4 KORA_S3 Korcula LBC1936 MESA_AFA_new MESA_CAU_new MESA_HIS_new NEO NFBC66 NFBC86 orcades PIVUS QBB Raine RS1 RS2 RS3 SAPALDIA_Edinburgh SAPALDIA_Gabriel SHIP-1 SHIP-TREND-0 SHIP-TREND-0_B2 Split Twins_UK UKB_AFR UKB_AMR UKB_EAS UKB_EUR UKB_SAS UKHLS VIKING Vis YFS	0.579206	0.138328	0.655371	0.649294	0.548148	570335	570333	565665	421045	0.59	0.5919	0.5812	0.5713	0.0023	0.0001	0.0008	0.0044	0.0009	0.0011	0.0001	0.0031	0.01553	0.9503	1.746e-08	0.1575	L3MBTL3(eQTL,PoPs,nearest)
EPB41L2	rs9388871	FALSE			6_131273882_A_G	6	131273882	FVC	FEV1,FVC	A	G	0.229	0.229	7.605	2.85e-14	++++++--+--+-+-++-+--+++++++-++++++-++-++++-++++--	ALHS ALSPAC ARIC_AA ARIC_EA B58C BHS CHSAA CHSEA CKB EPIC EXCEED FHS FinnTwin GS20K H2000 HCHS hunt KORA_F4 KORA_S3 Korcula LBC1936 MESA_AFA_new MESA_CAU_new MESA_HIS_new NEO NFBC66 NFBC86 orcades PIVUS QBB Raine RS1 RS2 RS3 SAPALDIA_Edinburgh SAPALDIA_Gabriel SHIP-1 SHIP-TREND-0 SHIP-TREND-0_B2 Split Twins_UK UKB_AFR UKB_AMR UKB_EAS UKB_EUR UKB_SAS UKHLS VIKING Vis YFS	0.277084	0.059991	0.006166	0.337377	0.121936	581884	581882	577214	421045	0.2704	0.2697	0.2716	0.2799	0.0073	0.0101	-0.0001	0.007	0.0011	0.0013	0.0002	0.0035	1.38e-10	5.274e-14	0.5696	0.04346	EPB41L2(PoPs,nearest)
TARID	rs201395050	FALSE			6_134018119_C_CA	6	134018119	PEF		CA	C	0.145	0.145	-9.189	3.96e-20	???????????????????-??	ALSPAC ARIC_AA B58C EPIC FinnTwin hunt LBC1936 orcades Raine RS1 RS2 RS3 SHIP-1 SHIP-TREND-0 SHIP-TREND-0_B2 Split UKB_AFR UKB_AMR UKB_EAS UKB_EUR UKB_SAS VIKING	0.145425	0.235249	0.126084	0.111169	0.304449	420050	420050	420050	336335	0.1763	0.1789	0.1591	0.1542	-0.003	0.0006	-0.0008	-0.0503	0.0018	0.0021	0.0002	0.0051	0.09145	0.787	0.0002321	1.102e-22	TARID(nearest), TCF21(PoPs)
TCF21	rs12190287	FALSE			6_134214525_C_G	6	134214525	PEF	PEF,FF	C	G	0.63	0.37	10.97	5.3e-28	++-+-+++--+-++++-+-++-	ALSPAC ARIC_AA B58C EPIC FinnTwin hunt LBC1936 orcades Raine RS1 RS2 RS3 SHIP-1 SHIP-TREND-0 SHIP-TREND-0_B2 Split UKB_AFR UKB_AMR UKB_EAS UKB_EUR UKB_SAS VIKING	0.625407	0.956943	0.575128	0.612223	0.468384	581841	581839	577171	421045	0.6197	0.6193	0.6208	0.6284	-0.0001	-0.0052	0.001	0.0352	0.0009	0.0011	0.0001	0.0032	0.8786	2.667e-06	8.718e-13	1.871e-28	TCF21(eQTL,PoPs,nearest)
SLC2A12	rs2627237	TRUE	rs2627237	30804560	6_134339265_A_G	6	134339265	FEV1		A	G	0.586	0.414	6.799	1.05e-11	-+-++++-+++++--++++---+-+-+++++-++++++-+++++++++++	ALHS ALSPAC ARIC_AA ARIC_EA B58C BHS CHSAA CHSEA CKB EPIC EXCEED FHS FinnTwin GS20K H2000 HCHS hunt KORA_F4 KORA_S3 Korcula LBC1936 MESA_AFA_new MESA_CAU_new MESA_HIS_new NEO NFBC66 NFBC86 orcades PIVUS QBB Raine RS1 RS2 RS3 SAPALDIA_Edinburgh SAPALDIA_Gabriel SHIP-1 SHIP-TREND-0 SHIP-TREND-0_B2 Split Twins_UK UKB_AFR UKB_AMR UKB_EAS UKB_EUR UKB_SAS UKHLS VIKING Vis YFS	0.588003	0.516318	0.543226	0.566538	0.566522	581889	581887	577219	421045	0.5847	0.5844	0.5862	0.5924	0.0058	0.0056	0.0004	0.0128	0.0009	0.0011	0.0001	0.0031	2.885e-10	2.005e-07	0.007599	3.866e-05	SLC2A12(nearest), TCF21(PoPs)
LINC00271	rs6941396	FALSE			6_135927526_A_G	6	135927526	FVC		A	G	0.305	0.305	-6.589	4.44e-11	+--++-+-----------++++++-++++----+---+-+-+-------+	ALHS ALSPAC ARIC_AA ARIC_EA B58C BHS CHSAA CHSEA CKB EPIC EXCEED FHS FinnTwin GS20K H2000 HCHS hunt KORA_F4 KORA_S3 Korcula LBC1936 MESA_AFA_new MESA_CAU_new MESA_HIS_new NEO NFBC66 NFBC86 orcades PIVUS QBB Raine RS1 RS2 RS3 SAPALDIA_Edinburgh SAPALDIA_Gabriel SHIP-1 SHIP-TREND-0 SHIP-TREND-0_B2 Split Twins_UK UKB_AFR UKB_AMR UKB_EAS UKB_EUR UKB_SAS UKHLS VIKING Vis YFS	0.324234	0.157816	0.252133	0.280225	0.364738	581883	581881	577213	421045	0.3051	0.3039	0.3145	0.318	-0.005	-0.0073	0.0002	-0.0005	0.001	0.0012	0.0001	0.0033	5.19e-07	2.501e-10	0.1708	0.8686	AHI1(rare_disease,PoPs), LINC00271(nearest)
LOC100507477	rs623331	TRUE	rs646695	30804561	6_140284946_C_T	6	140284946	FEV1	PEF,FEV1,FVC	T	C	0.261	0.261	-8.748	2.18e-18	--+-++----+------+---------+---++-+-+--+------+-	ALHS ALSPAC ARIC_AA ARIC_EA B58C BHS CHSAA CHSEA CKB EPIC EXCEED FHS FinnTwin GS20K H2000 HCHS hunt KORA_F4 KORA_S3 Korcula LBC1936 MESA_AFA_new MESA_CAU_new MESA_HIS_new NEO NFBC66 NFBC86 orcades PIVUS Raine RS1 RS2 RS3 SAPALDIA_Edinburgh SAPALDIA_Gabriel SHIP-1 SHIP-TREND-0 SHIP-TREND-0_B2 Split Twins_UK UKB_AFR UKB_EAS UKB_EUR UKB_SAS UKHLS VIKING Vis YFS	0.244172	0.136586	0.445668	0.340373	0.38022	581886	581884	577216	421045	0.2797	0.2839	0.2586	0.2412	-0.0092	-0.0071	-0.0012	-0.0321	0.001	0.0012	0.0002	0.0036	9.397e-19	4.244e-09	2.853e-14	4.078e-19	LOC100507477(nearest)
MIR4465	rs7740406	FALSE			6_141332334_C_T	6	141332334	FEV1/FVC		T	C	0.712	0.288	-6.235	4.51e-10	------------+-----+-+---	ALSPAC ARIC_EA B58C BHS EPIC EXCEED FHS GS20K H2000 hunt Korcula MESA_CAU_new NEO PIVUS RS1 RS2 RS3 SAPALDIA_Edinburgh SAPALDIA_Gabriel SHIP-1 SHIP-TREND-0_B2 UKB_EUR UKHLS VIKING	0.712037	0.842684	0.561236	0.701252	0.658618	581887	581885	577217	421045	0.6692	0.6643	0.6941	0.7028	-0.0046	-0.0023	-0.0008	-0.0148	0.001	0.0011	0.0001	0.0034	2.984e-06	0.04098	5.266e-09	1.058e-05	MIR4465(nearest)
VTA1	rs9385988	TRUE	rs9385988	30804560	6_142560957_A_G	6	142560957	FEV1	PEF,FEV1,FVC,FF	A	G	0.659	0.341	-12.704	5.61e-37	-+----+-------------+-------------+--+---+---+----	ALHS ALSPAC ARIC_AA ARIC_EA B58C BHS CHSAA CHSEA CKB EPIC EXCEED FHS FinnTwin GS20K H2000 HCHS hunt KORA_F4 KORA_S3 Korcula LBC1936 MESA_AFA_new MESA_CAU_new MESA_HIS_new NEO NFBC66 NFBC86 orcades PIVUS QBB Raine RS1 RS2 RS3 SAPALDIA_Edinburgh SAPALDIA_Gabriel SHIP-1 SHIP-TREND-0 SHIP-TREND-0_B2 Split Twins_UK UKB_AFR UKB_AMR UKB_EAS UKB_EUR UKB_SAS UKHLS VIKING Vis YFS	0.724751	0.784411	0.286117	0.819885	0.800508	581889	581887	577219	421045	0.6359	0.63	0.6934	0.723	-0.0116	-0.0073	-0.0019	-0.0317	0.001	0.0012	0.0001	0.0034	1.091e-30	6.097e-10	6.059e-37	1.268e-20	ADGRG6(PoPs), RP11-63E9.1(eQTL), VTA1(nearest)
ADGRG6	rs17280293	TRUE	rs148274477	26635082	6_142688969_A_G	6	142688969	FEV1/FVC	PEF,FVC,FF	A	G	0.973	0.027	-19.259	1.19e-82	--?---?-----+------+-?------+---------++?+-----++	ALHS ALSPAC ARIC_AA ARIC_EA B58C BHS CHSAA CHSEA CKB EPIC EXCEED FHS FinnTwin GS20K H2000 HCHS hunt KORA_F4 KORA_S3 Korcula LBC1936 MESA_AFA_new MESA_CAU_new MESA_HIS_new NEO NFBC66 NFBC86 orcades PIVUS Raine RS1 RS2 RS3 SAPALDIA_Edinburgh SAPALDIA_Gabriel SHIP-1 SHIP-TREND-0 SHIP-TREND-0_B2 Split Twins_UK UKB_AFR UKB_AMR UKB_EAS UKB_EUR UKB_SAS UKHLS VIKING Vis YFS	0.972481	0.998817	0.978581	0.978913	0.985246	581225	581223	576555	421045	0.9722	0.9723	0.9717	0.9716	-0.0072	0.0348	-0.0105	-0.1291	0.0028	0.0033	0.0004	0.0094	0.01045	6.286e-26	3.57e-146	2.411e-43	ADGRG6(PoPs,credible,nearest)
ADGRG6	6:142744750_A_C	FALSE			6_142744750_A_C	6	142744750	FEV1/FVC		A	C	0.997	0.003	-7.483	7.27e-14	?----??---?+-?-??+?-?-???-?-----+?-???-?-+??	ALHS ALSPAC ARIC_EA B58C BHS CHSEA CKB EPIC EXCEED FHS FinnTwin GS20K H2000 HCHS hunt KORA_F4 KORA_S3 Korcula LBC1936 MESA_CAU_new MESA_HIS_new NEO NFBC66 NFBC86 orcades PIVUS Raine RS1 RS2 RS3 SAPALDIA_Edinburgh SAPALDIA_Gabriel SHIP-1 SHIP-TREND-0 SHIP-TREND-0_B2 Split Twins_UK UKB_EAS UKB_EUR UKB_SAS UKHLS VIKING Vis YFS	0.996888	0.999985	0.999955	0.999592	0.999182	421408	421423	416747	377697	0.9968	0.9968	0.9968	0.9969	-0.0037	0.0811	-0.0171	-0.1894	0.0131	0.0154	0.0017	0.0392	0.7802	1.288e-07	1.424e-22	1.384e-06	ADGRG6(PoPs,nearest)
ADGRG6	rs7753012	TRUE	rs7753012	20010835	6_142745883_G_T	6	142745883	FEV1/FVC	PEF,FEV1,FF	T	G	0.613	0.387	-30.58	2.28e-205	------+-----+------+++-----+----------------------	ALHS ALSPAC ARIC_AA ARIC_EA B58C BHS CHSAA CHSEA CKB EPIC EXCEED FHS FinnTwin GS20K H2000 HCHS hunt KORA_F4 KORA_S3 Korcula LBC1936 MESA_AFA_new MESA_CAU_new MESA_HIS_new NEO NFBC66 NFBC86 orcades PIVUS QBB Raine RS1 RS2 RS3 SAPALDIA_Edinburgh SAPALDIA_Gabriel SHIP-1 SHIP-TREND-0 SHIP-TREND-0_B2 Split Twins_UK UKB_AFR UKB_AMR UKB_EAS UKB_EUR UKB_SAS UKHLS VIKING Vis YFS	0.695223	0.051846	0.243642	0.637141	0.660675	581889	581887	577219	421045	0.6094	0.6034	0.6572	0.6876	-0.0107	0.0045	-0.0043	-0.0484	0.001	0.0012	0.0001	0.0033	1.664e-26	0.0001405	2.33e-196	6.369e-48	ADGRG6(PoPs,nearest)
LOC153910	rs12214216	FALSE			6_142963531_C_G	6	142963531	FEV1/FVC		C	G	0.906	0.094	6.043	1.51e-09	+++++-+++++++----++-+++-	ALSPAC ARIC_EA B58C BHS EPIC EXCEED FHS GS20K H2000 hunt Korcula MESA_CAU_new NEO PIVUS RS1 RS2 RS3 SAPALDIA_Edinburgh SAPALDIA_Gabriel SHIP-1 SHIP-TREND-0_B2 UKB_EUR UKHLS VIKING	0.906001	0.885182	0.9969	0.907896	0.967562	580325	580323	575655	419481	0.9042	0.9042	0.9044	0.9068	-0.0067	-0.0075	-0.0004	-0.0065	0.0017	0.002	0.0002	0.0053	7.924e-05	0.0001978	0.1093	0.2187	HIVEP2(PoPs), LOC153910(nearest)
PHACTR2	rs9496739	FALSE			6_144020900_A_G	6	144020900	FVC	FEV1,FVC	A	G	0.259	0.259	-7.227	4.94e-13	-+--------------+-----+-++---+--+--+-+----++	ALHS ALSPAC ARIC_EA B58C BHS CHSEA CKB EPIC EXCEED FHS FinnTwin GS20K H2000 HCHS hunt KORA_F4 KORA_S3 Korcula LBC1936 MESA_CAU_new MESA_HIS_new NEO NFBC66 NFBC86 orcades PIVUS Raine RS1 RS2 RS3 SAPALDIA_Edinburgh SAPALDIA_Gabriel SHIP-1 SHIP-TREND-0 SHIP-TREND-0_B2 Split Twins_UK UKB_EAS UKB_EUR UKB_SAS UKHLS VIKING Vis YFS	0.237514	0.740443	0.384009	0.222161	0.358285	581889	581887	577219	421045	0.2849	0.2889	0.2648	0.2468	-0.0057	-0.008	0.0002	-0.0087	0.001	0.0012	0.0002	0.0036	3.18e-08	2.184e-11	0.3184	0.01503	PEX3(rare_disease), PHACTR2(nearest), PLAGL1(PoPs)
UST	rs4336467	FALSE			6_149381881_A_G	6	149381881	PEF		A	G	0.367	0.367	-8.823	1.11e-18	--+---+++---+---------	ALSPAC ARIC_AA B58C EPIC FinnTwin hunt LBC1936 orcades Raine RS1 RS2 RS3 SHIP-1 SHIP-TREND-0 SHIP-TREND-0_B2 Split UKB_AFR UKB_AMR UKB_EAS UKB_EUR UKB_SAS VIKING	0.368432	0.40534	0.0786746	0.26551	0.320448	581889	581887	577219	421045	0.3485	0.3468	0.3602	0.3608	-0.0021	-0.0014	-0.0003	-0.0287	0.001	0.0012	0.0001	0.0032	0.03752	0.2415	0.05743	1.613e-19	TAB2(PoPs), UST(nearest)
ZC3H12D	rs1001305	FALSE			6_149757944_A_G	6	149757944	PEF		A	G	0.23	0.23	-6.193	5.9e-10	-++---+--------+------	ALSPAC ARIC_AA B58C EPIC FinnTwin hunt LBC1936 orcades Raine RS1 RS2 RS3 SHIP-1 SHIP-TREND-0 SHIP-TREND-0_B2 Split UKB_AFR UKB_AMR UKB_EAS UKB_EUR UKB_SAS VIKING	0.230684	0.321252	0.0307056	0.240117	0.128466	581888	581886	577218	421045	0.2247	0.224	0.2283	0.2284	-0.0055	-0.0052	-0.0005	-0.0239	0.0012	0.0014	0.0002	0.0036	3.294e-06	0.0001675	0.003583	5.181e-11	TAB2(PoPs), ZC3H12D(nearest)
MTHFD1L	rs1079660	FALSE			6_151343977_C_T	6	151343977	PEF		T	C	0.73	0.27	6.327	2.51e-10	-+++-++-+++-++-++++++	ALSPAC ARIC_AA B58C EPIC FinnTwin hunt LBC1936 orcades Raine RS1 RS2 RS3 SHIP-1 SHIP-TREND-0 SHIP-TREND-0_B2 Split UKB_AFR UKB_EAS UKB_EUR UKB_SAS VIKING	0.725674	0.773083	0.993115	0.674699	0.887445	581884	581882	577214	421045	0.7342	0.7348	0.7316	0.7318	0.0051	0.0036	0.0007	0.0219	0.0011	0.0013	0.0002	0.0034	7.375e-06	0.007556	1.406e-05	2.081e-10	MTHFD1L(nearest), PLEKHG1(PoPs)
ESR1	rs9479117	FALSE			6_152117685_C_T	6	152117685	PEF		T	C	0.836	0.164	-7.528	5.17e-14	--+-+-+---+-----+-----	ALSPAC ARIC_AA B58C EPIC FinnTwin hunt LBC1936 orcades Raine RS1 RS2 RS3 SHIP-1 SHIP-TREND-0 SHIP-TREND-0_B2 Split UKB_AFR UKB_AMR UKB_EAS UKB_EUR UKB_SAS VIKING	0.842714	0.53642	0.731756	0.879701	0.837843	581889	581887	577219	421045	0.7909	0.7885	0.8133	0.8275	-0.0033	-0.0006	-0.0009	-0.0317	0.0012	0.0014	0.0002	0.0041	0.004247	0.6435	1.327e-06	1.332e-14	ESR1(PoPs,nearest)
ESR1	rs2982713	FALSE			6_152359171_A_G	6	152359171	PEF		A	G	0.283	0.283	-6.539	6.2e-11	+---+-+--------+---+-	ALSPAC ARIC_AA B58C EPIC FinnTwin hunt LBC1936 orcades Raine RS1 RS2 RS3 SHIP-1 SHIP-TREND-0 SHIP-TREND-0_B2 Split UKB_AFR UKB_EAS UKB_EUR UKB_SAS VIKING	0.273952	0.704303	0.493467	0.262892	0.419202	581889	581887	577219	421045	0.3235	0.3278	0.3008	0.2815	-0.002	-0.0005	-0.0005	-0.0218	0.001	0.0011	0.0001	0.0034	0.03807	0.6662	0.000203	1.426e-10	ESR1(PoPs,nearest)
SYNE1	rs6904757	TRUE	rs6904757	31911640	6_152593102_A_G	6	152593102	FEV1	FEV1,FVC	A	G	0.594	0.406	6.738	1.61e-11	+-++++-++++--+++++-++-++-+---+--+-+++++-++-++-++-+	ALHS ALSPAC ARIC_AA ARIC_EA B58C BHS CHSAA CHSEA CKB EPIC EXCEED FHS FinnTwin GS20K H2000 HCHS hunt KORA_F4 KORA_S3 Korcula LBC1936 MESA_AFA_new MESA_CAU_new MESA_HIS_new NEO NFBC66 NFBC86 orcades PIVUS QBB Raine RS1 RS2 RS3 SAPALDIA_Edinburgh SAPALDIA_Gabriel SHIP-1 SHIP-TREND-0 SHIP-TREND-0_B2 Split Twins_UK UKB_AFR UKB_AMR UKB_EAS UKB_EUR UKB_SAS UKHLS VIKING Vis YFS	0.635615	0.56408	0.37111	0.583031	0.599757	581881	581879	577211	421045	0.5828	0.5806	0.6098	0.6322	0.0059	0.0066	0.0001	0.0125	0.0009	0.0011	0.0001	0.0032	4.6e-10	1.877e-09	0.347	9.297e-05	ESR1(PoPs), SYNE1(nearest)
SCAF8	rs9322480	FALSE			6_155128332_C_G	6	155128332	FEV1/FVC		C	G	0.508	0.492	-6.663	2.68e-11	++-----+---------+-+--------+--+-----+-------+--++	ALHS ALSPAC ARIC_AA ARIC_EA B58C BHS CHSAA CHSEA CKB EPIC EXCEED FHS FinnTwin GS20K H2000 HCHS hunt KORA_F4 KORA_S3 Korcula LBC1936 MESA_AFA_new MESA_CAU_new MESA_HIS_new NEO NFBC66 NFBC86 orcades PIVUS QBB Raine RS1 RS2 RS3 SAPALDIA_Edinburgh SAPALDIA_Gabriel SHIP-1 SHIP-TREND-0 SHIP-TREND-0_B2 Split Twins_UK UKB_AFR UKB_AMR UKB_EAS UKB_EUR UKB_SAS UKHLS VIKING Vis YFS	0.428736	0.812844	0.883968	0.468121	0.654525	581887	581885	577217	421045	0.4771	0.4805	0.4506	0.4341	-0.0014	0.0017	-0.0008	-0.009	0.001	0.0011	0.0001	0.0031	0.1563	0.1302	1.134e-09	0.003662	SCAF8(eQTL,nearest), TIAM2(PoPs)
TIAM2	rs9371862	FALSE			6_155437860_G_T	6	155437860	FVC	FEV1,FVC	T	G	0.25	0.25	-7.043	1.89e-12	--+-+-+--+--+----+--++-+-+-++---++---++---+-----+-	ALHS ALSPAC ARIC_AA ARIC_EA B58C BHS CHSAA CHSEA CKB EPIC EXCEED FHS FinnTwin GS20K H2000 HCHS hunt KORA_F4 KORA_S3 Korcula LBC1936 MESA_AFA_new MESA_CAU_new MESA_HIS_new NEO NFBC66 NFBC86 orcades PIVUS QBB Raine RS1 RS2 RS3 SAPALDIA_Edinburgh SAPALDIA_Gabriel SHIP-1 SHIP-TREND-0 SHIP-TREND-0_B2 Split Twins_UK UKB_AFR UKB_AMR UKB_EAS UKB_EUR UKB_SAS UKHLS VIKING Vis YFS	0.218858	0.282771	0.420319	0.214463	0.43325	581886	581884	577216	421045	0.2741	0.2762	0.2428	0.2217	-0.0066	-0.0086	0	-0.0124	0.001	0.0012	0.0002	0.0037	2.94e-10	2.406e-12	0.9861	0.0007353	TIAM2(eQTL,PoPs,nearest), CLDN20(eQTL), RP11-477D19.2(eQTL), TFB1M(eQTL), TFB1M,TIAM2(eQTL)
GTF2H5	rs661857	FALSE			6_158658788_C_T	6	158658788	FVC	FEV1,FVC	T	C	0.502	0.498	-6.288	3.21e-10	-+--++--+-+-+--+-----+--+-+---++----++-+-------+-+	ALHS ALSPAC ARIC_AA ARIC_EA B58C BHS CHSAA CHSEA CKB EPIC EXCEED FHS FinnTwin GS20K H2000 HCHS hunt KORA_F4 KORA_S3 Korcula LBC1936 MESA_AFA_new MESA_CAU_new MESA_HIS_new NEO NFBC66 NFBC86 orcades PIVUS QBB Raine RS1 RS2 RS3 SAPALDIA_Edinburgh SAPALDIA_Gabriel SHIP-1 SHIP-TREND-0 SHIP-TREND-0_B2 Split Twins_UK UKB_AFR UKB_AMR UKB_EAS UKB_EUR UKB_SAS UKHLS VIKING Vis YFS	0.517364	0.655855	0.48312	0.500004	0.580219	581889	581887	577219	421045	0.4986	0.4963	0.5087	0.5229	-0.0048	-0.006	0.0001	-0.0098	0.0009	0.0011	0.0001	0.0031	1.389e-07	1.32e-08	0.7014	0.001393	GTF2H5(nearest), TULP4(PoPs)
PACRG	rs6913469	FALSE			6_163684427_C_T	6	163684427	PEF		T	C	0.27	0.27	6.477	9.34e-11	+-++-+++-+++++++-++++-	ALSPAC ARIC_AA B58C EPIC FinnTwin hunt LBC1936 orcades Raine RS1 RS2 RS3 SHIP-1 SHIP-TREND-0 SHIP-TREND-0_B2 Split UKB_AFR UKB_AMR UKB_EAS UKB_EUR UKB_SAS VIKING	0.271156	0.141794	0.283242	0.288283	0.218839	581859	581857	577189	421045	0.2702	0.2702	0.2701	0.2791	0.002	0.0025	0	0.0229	0.001	0.0012	0.0002	0.0035	0.05406	0.03938	0.8491	4.873e-11	PACRG(nearest), QKI(PoPs)
THBS2	rs3253	FALSE			6_169616112_C_T	6	169616112	FVC	FEV1,FVC	T	C	0.332	0.332	7.932	2.16e-15	++-+++++++?+-+-++++--+--+-+--++-+-+-+--+++--+++-++	ALHS ALSPAC ARIC_AA ARIC_EA B58C BHS CHSAA CHSEA CKB EPIC EXCEED FHS FinnTwin GS20K H2000 HCHS hunt KORA_F4 KORA_S3 Korcula LBC1936 MESA_AFA_new MESA_CAU_new MESA_HIS_new NEO NFBC66 NFBC86 orcades PIVUS QBB Raine RS1 RS2 RS3 SAPALDIA_Edinburgh SAPALDIA_Gabriel SHIP-1 SHIP-TREND-0 SHIP-TREND-0_B2 Split Twins_UK UKB_AFR UKB_AMR UKB_EAS UKB_EUR UKB_SAS UKHLS VIKING Vis YFS	0.313356	0.471122	0.408936	0.32972	0.406158	581888	581886	575884	421045	0.3378	0.339	0.3296	0.3197	0.0066	0.0082	0	0.0027	0.001	0.0011	0.0001	0.0033	8.368e-12	1.97e-13	0.7506	0.4124	THBS2(eQTL,PoPs,nearest), RP1-137D17.1(eQTL), XXyac-YX65C7_A.2(eQTL)
TMEM184A	rs10952168	FALSE			7_1594428_A_G	7	1594428	FVC		A	G	0.587	0.413	6.128	8.92e-10	-+-+----++++--+-+-+++++-++-+++-++++-+-++-+++++-++-	ALHS ALSPAC ARIC_AA ARIC_EA B58C BHS CHSAA CHSEA CKB EPIC EXCEED FHS FinnTwin GS20K H2000 HCHS hunt KORA_F4 KORA_S3 Korcula LBC1936 MESA_AFA_new MESA_CAU_new MESA_HIS_new NEO NFBC66 NFBC86 orcades PIVUS QBB Raine RS1 RS2 RS3 SAPALDIA_Edinburgh SAPALDIA_Gabriel SHIP-1 SHIP-TREND-0 SHIP-TREND-0_B2 Split Twins_UK UKB_AFR UKB_AMR UKB_EAS UKB_EUR UKB_SAS UKHLS VIKING Vis YFS	0.562686	0.651289	0.652813	0.479807	0.532904	580640	580638	575970	421045	0.5883	0.5918	0.5742	0.561	0.0049	0.0064	0	0.0109	0.0009	0.0011	0.0001	0.0031	1.743e-07	5.192e-09	0.8971	0.000413	CHST12(eQTL), ELFN1(mouse_KO), FTSJ2(eQTL), INTS1(PoPs), TMEM184A(nearest)
GNA12	rs11420712	TRUE	rs798565	30804561	7_2807248_T_TA	7	2807248	FEV1/FVC	PEF,FEV1,FF	T	TA	0.726	0.274	-7.449	9.37e-14	??+?????-?????---????+?+?????-???????????-----????	ALHS ALSPAC ARIC_AA ARIC_EA B58C BHS CHSAA CHSEA CKB EPIC EXCEED FHS FinnTwin GS20K H2000 HCHS hunt KORA_F4 KORA_S3 Korcula LBC1936 MESA_AFA_new MESA_CAU_new MESA_HIS_new NEO NFBC66 NFBC86 orcades PIVUS QBB Raine RS1 RS2 RS3 SAPALDIA_Edinburgh SAPALDIA_Gabriel SHIP-1 SHIP-TREND-0 SHIP-TREND-0_B2 Split Twins_UK UKB_AFR UKB_AMR UKB_EAS UKB_EUR UKB_SAS UKHLS VIKING Vis YFS	0.699778	0.924903	0.765812	0.755278	0.84049	464518	464518	464518	365467	0.7246	0.7262	0.7108	0.7046	-0.0075	-0.0048	-0.0012	-0.0236	0.0012	0.0014	0.0002	0.0038	9.077e-11	0.0003957	7.418e-14	5.42e-10	GNA12(PoPs,nearest), CARD11(rare_disease), LFNG(rare_disease)
ZNF853	rs940871	FALSE			7_6663670_A_G	7	6663670	FVC	FEV1,FVC	A	G	0.575	0.425	-6.932	4.16e-12	+-------------+--------+--+----++-+-------------++	ALHS ALSPAC ARIC_AA ARIC_EA B58C BHS CHSAA CHSEA CKB EPIC EXCEED FHS FinnTwin GS20K H2000 HCHS hunt KORA_F4 KORA_S3 Korcula LBC1936 MESA_AFA_new MESA_CAU_new MESA_HIS_new NEO NFBC66 NFBC86 orcades PIVUS QBB Raine RS1 RS2 RS3 SAPALDIA_Edinburgh SAPALDIA_Gabriel SHIP-1 SHIP-TREND-0 SHIP-TREND-0_B2 Split Twins_UK UKB_AFR UKB_AMR UKB_EAS UKB_EUR UKB_SAS UKHLS VIKING Vis YFS	0.50997	0.914843	0.823428	0.616441	0.857757	581889	581887	577219	421045	0.5619	0.5658	0.536	0.516	-0.0056	-0.0072	0.0001	-0.0022	0.001	0.0011	0.0001	0.0031	4.339e-09	1.058e-10	0.4873	0.4778	CCZ1(eQTL), CCZ1B(eQTL), ENSG00000226150(eQTL), RAC1(PoPs), ZNF853(nearest)
C1GALT1	rs12702594	TRUE	rs10246303	28166213	7_7256828_C_T	7	7256828	FEV1/FVC	PEF,FEV1,FF	T	C	0.233	0.233	-7.229	4.86e-13	-++--+-------+---+-++---+-+-++-+----++--++-+----++	ALHS ALSPAC ARIC_AA ARIC_EA B58C BHS CHSAA CHSEA CKB EPIC EXCEED FHS FinnTwin GS20K H2000 HCHS hunt KORA_F4 KORA_S3 Korcula LBC1936 MESA_AFA_new MESA_CAU_new MESA_HIS_new NEO NFBC66 NFBC86 orcades PIVUS QBB Raine RS1 RS2 RS3 SAPALDIA_Edinburgh SAPALDIA_Gabriel SHIP-1 SHIP-TREND-0 SHIP-TREND-0_B2 Split Twins_UK UKB_AFR UKB_AMR UKB_EAS UKB_EUR UKB_SAS UKHLS VIKING Vis YFS	0.178683	0.341831	0.531049	0.176186	0.199554	581889	581887	577219	421045	0.2757	0.2852	0.2241	0.185	-0.0046	-0.0014	-0.0012	-0.0236	0.0011	0.0013	0.0002	0.0039	2.944e-05	0.264	1.436e-12	2.414e-09	C1GALT1(eQTL,nearest), COL28A1(PoPs)
DGKB	rs217554	FALSE			7_14905933_A_G	7	14905933	FEV1/FVC		A	G	0.615	0.385	6.479	9.2e-11	++--++--+++++++++++++++-+++-+++++++----+-+++-+-++	ALHS ALSPAC ARIC_AA ARIC_EA B58C BHS CHSAA CHSEA CKB EPIC EXCEED FHS FinnTwin GS20K H2000 HCHS hunt KORA_F4 KORA_S3 Korcula LBC1936 MESA_AFA_new MESA_CAU_new MESA_HIS_new NEO NFBC66 NFBC86 orcades PIVUS Raine RS1 RS2 RS3 SAPALDIA_Edinburgh SAPALDIA_Gabriel SHIP-1 SHIP-TREND-0 SHIP-TREND-0_B2 Split Twins_UK UKB_AFR UKB_AMR UKB_EAS UKB_EUR UKB_SAS UKHLS VIKING Vis YFS	0.672258	0.405405	0.236385	0.559372	0.357264	581889	581887	577219	421045	0.5933	0.5838	0.6346	0.6519	0.0054	0.003	0.0009	0.0117	0.001	0.0011	0.0001	0.0033	4.252e-08	0.008279	3.863e-10	0.0003058	DGKB(PoPs,nearest)
DGKB	rs56751608	FALSE			7_14943164_A_G	7	14943164	FEV1	FEV1,FVC	A	G	0.668	0.332	8.438	3.24e-17	+-++++++++++--++--+++-+-+++++-+++++--++++++++++++-	ALHS ALSPAC ARIC_AA ARIC_EA B58C BHS CHSAA CHSEA CKB EPIC EXCEED FHS FinnTwin GS20K H2000 HCHS hunt KORA_F4 KORA_S3 Korcula LBC1936 MESA_AFA_new MESA_CAU_new MESA_HIS_new NEO NFBC66 NFBC86 orcades PIVUS QBB Raine RS1 RS2 RS3 SAPALDIA_Edinburgh SAPALDIA_Gabriel SHIP-1 SHIP-TREND-0 SHIP-TREND-0_B2 Split Twins_UK UKB_AFR UKB_AMR UKB_EAS UKB_EUR UKB_SAS UKHLS VIKING Vis YFS	0.766115	0.435854	0.173025	0.738694	0.453593	581861	581859	577191	421045	0.6649	0.6549	0.7185	0.7536	0.0085	0.0088	0.0006	0.0115	0.0011	0.0013	0.0002	0.0036	8.859e-15	9.266e-12	0.0004171	0.001641	DGKB(PoPs,nearest)
AGMO	rs2164394	TRUE	rs55905169	30061609	7_15502152_C_T	7	15502152	FVC	FEV1,FVC	T	C	0.761	0.239	7.524	5.32e-14	+-+-+++++++++-++++++++-+++++-++++-+++++-++++++++++	ALHS ALSPAC ARIC_AA ARIC_EA B58C BHS CHSAA CHSEA CKB EPIC EXCEED FHS FinnTwin GS20K H2000 HCHS hunt KORA_F4 KORA_S3 Korcula LBC1936 MESA_AFA_new MESA_CAU_new MESA_HIS_new NEO NFBC66 NFBC86 orcades PIVUS QBB Raine RS1 RS2 RS3 SAPALDIA_Edinburgh SAPALDIA_Gabriel SHIP-1 SHIP-TREND-0 SHIP-TREND-0_B2 Split Twins_UK UKB_AFR UKB_AMR UKB_EAS UKB_EUR UKB_SAS UKHLS VIKING Vis YFS	0.838792	0.874099	0.403035	0.777589	0.702971	581887	581885	577217	421045	0.6998	0.6856	0.7683	0.8261	0.0057	0.0087	-0.0005	0.0038	0.0011	0.0013	0.0002	0.0041	5.476e-07	2.701e-11	0.003087	0.3477	AGMO(nearest), MEOX2(PoPs)
MEOX2-AS1	rs4721455	TRUE	rs4721457	30804560	7_15849236_C_T	7	15849236	FEV1/FVC		T	C	0.143	0.143	-8.013	1.12e-15	-------+----+------++++++-----+---+----+--+-------	ALHS ALSPAC ARIC_AA ARIC_EA B58C BHS CHSAA CHSEA CKB EPIC EXCEED FHS FinnTwin GS20K H2000 HCHS hunt KORA_F4 KORA_S3 Korcula LBC1936 MESA_AFA_new MESA_CAU_new MESA_HIS_new NEO NFBC66 NFBC86 orcades PIVUS QBB Raine RS1 RS2 RS3 SAPALDIA_Edinburgh SAPALDIA_Gabriel SHIP-1 SHIP-TREND-0 SHIP-TREND-0_B2 Split Twins_UK UKB_AFR UKB_AMR UKB_EAS UKB_EUR UKB_SAS UKHLS VIKING Vis YFS	0.151254	0.192684	0.0739243	0.116499	0.0565092	581889	581887	577219	421045	0.1478	0.1471	0.1531	0.1511	-0.0054	-0.0007	-0.0013	-0.0125	0.0013	0.0015	0.0002	0.0043	3.728e-05	0.6639	6.607e-13	0.003288	DGKB(eQTL), MEOX2(PoPs), MEOX2-AS1(nearest)
SNX13	rs11980271	FALSE			7_17730402_C_G	7	17730402	FEV1	FEV1,FVC	C	G	0.676	0.324	6.57	5.04e-11	++++-++-+-+--+++++--+++-+++++++++++++++-+-++-+-++	ALHS ALSPAC ARIC_AA ARIC_EA B58C BHS CHSAA CHSEA CKB EPIC EXCEED FHS FinnTwin GS20K H2000 HCHS hunt KORA_F4 KORA_S3 Korcula LBC1936 MESA_AFA_new MESA_CAU_new MESA_HIS_new NEO NFBC66 NFBC86 orcades PIVUS Raine RS1 RS2 RS3 SAPALDIA_Edinburgh SAPALDIA_Gabriel SHIP-1 SHIP-TREND-0 SHIP-TREND-0_B2 Split Twins_UK UKB_AFR UKB_AMR UKB_EAS UKB_EUR UKB_SAS UKHLS VIKING Vis YFS	0.667876	0.41133	0.741926	0.683769	0.765888	581888	581886	577218	421045	0.6802	0.6809	0.6717	0.6698	0.0066	0.0077	0.0001	0.0142	0.001	0.0011	0.0001	0.0033	1.004e-11	1.378e-11	0.5234	1.198e-05	SNX13(eQTL,PoPs,nearest), ENSG00000279048(eQTL)
HDAC9	rs1528683	FALSE			7_18236507_C_G	7	18236507	FEV1	FEV1,FVC	C	G	0.883	0.117	10.043	9.84e-24	-++--++-++++++++++-+-+--+-+++++++-++-++-----+++-++	ALHS ALSPAC ARIC_AA ARIC_EA B58C BHS CHSAA CHSEA CKB EPIC EXCEED FHS FinnTwin GS20K H2000 HCHS hunt KORA_F4 KORA_S3 Korcula LBC1936 MESA_AFA_new MESA_CAU_new MESA_HIS_new NEO NFBC66 NFBC86 orcades PIVUS QBB Raine RS1 RS2 RS3 SAPALDIA_Edinburgh SAPALDIA_Gabriel SHIP-1 SHIP-TREND-0 SHIP-TREND-0_B2 Split Twins_UK UKB_AFR UKB_AMR UKB_EAS UKB_EUR UKB_SAS UKHLS VIKING Vis YFS	0.898905	0.96505	0.798	0.913242	0.871861	581886	581884	577216	421045	0.8598	0.8569	0.884	0.9005	0.0138	0.0158	0.0004	0.007	0.0014	0.0016	0.0002	0.0051	1.083e-22	3.872e-22	0.04231	0.17	HDAC9(eQTL,PoPs,nearest)
HDAC9	rs55744175	FALSE			7_18332396_A_G	7	18332396	FEV1	FEV1,FVC	A	G	0.214	0.214	-6.677	2.44e-11	-----+---++-+-----+---++--++-----+----+-+++------	ALHS ALSPAC ARIC_AA ARIC_EA B58C BHS CHSAA CHSEA CKB EPIC EXCEED FHS FinnTwin GS20K H2000 HCHS hunt KORA_F4 KORA_S3 Korcula LBC1936 MESA_AFA_new MESA_CAU_new MESA_HIS_new NEO NFBC66 NFBC86 orcades PIVUS Raine RS1 RS2 RS3 SAPALDIA_Edinburgh SAPALDIA_Gabriel SHIP-1 SHIP-TREND-0 SHIP-TREND-0_B2 Split Twins_UK UKB_AFR UKB_AMR UKB_EAS UKB_EUR UKB_SAS UKHLS VIKING Vis YFS	0.217151	0.164093	0.215403	0.213882	0.123625	581888	581886	577218	421045	0.2135	0.2133	0.2151	0.2137	-0.0047	-0.005	-0.0003	-0.0128	0.0011	0.0013	0.0002	0.0037	2.011e-05	0.0001003	0.03185	0.0005847	HDAC9(eQTL,PoPs,nearest)
HDAC9	rs10280296	TRUE	rs28719767	31911640	7_19061426_A_G	7	19061426	FEV1		A	G	0.279	0.279	6.914	4.72e-12	+-+++--+++-+-+-++++-+-+-++-++----+-++-+-+++++++--	ALHS ALSPAC ARIC_AA ARIC_EA B58C BHS CHSAA CHSEA CKB EPIC EXCEED FHS FinnTwin GS20K H2000 HCHS hunt KORA_F4 KORA_S3 Korcula LBC1936 MESA_AFA_new MESA_CAU_new MESA_HIS_new NEO NFBC66 NFBC86 orcades PIVUS Raine RS1 RS2 RS3 SAPALDIA_Edinburgh SAPALDIA_Gabriel SHIP-1 SHIP-TREND-0 SHIP-TREND-0_B2 Split Twins_UK UKB_AFR UKB_AMR UKB_EAS UKB_EUR UKB_SAS UKHLS VIKING Vis YFS	0.287239	0.321859	0.231777	0.308613	0.34918	581868	581866	577198	421045	0.2775	0.2762	0.2833	0.2847	0.0063	0.0048	0.0008	0.0111	0.001	0.0012	0.0001	0.0034	4.449e-10	4.925e-05	1.34e-07	0.0009398	HDAC9(PoPs,nearest), TWIST1(mouse_KO)
LOC101927769	rs78446889	FALSE			7_20333101_A_C	7	20333101	FEV1/FVC		A	C	0.0504	0.0504	6.578	4.78e-11	+--++++-++++-++++++-++++++++---++-++++--+-+++-+--	ALHS ALSPAC ARIC_AA ARIC_EA B58C BHS CHSAA CHSEA CKB EPIC EXCEED FHS FinnTwin GS20K H2000 HCHS hunt KORA_F4 KORA_S3 Korcula LBC1936 MESA_AFA_new MESA_CAU_new MESA_HIS_new NEO NFBC66 NFBC86 orcades PIVUS Raine RS1 RS2 RS3 SAPALDIA_Edinburgh SAPALDIA_Gabriel SHIP-1 SHIP-TREND-0 SHIP-TREND-0_B2 Split Twins_UK UKB_AFR UKB_AMR UKB_EAS UKB_EUR UKB_SAS UKHLS VIKING Vis YFS	0.055684	0.107044	0.00881475	0.0670479	0.0171011	581780	581778	577110	421045	0.0547	0.0546	0.0558	0.0557	0.003	-0.0042	0.0018	0.0193	0.0022	0.0026	0.0003	0.0068	0.1683	0.1088	1.917e-09	0.004248	ITGB8(PoPs), LOC101927769(nearest)
ITGB8	rs3779505	FALSE			7_20405265_A_G	7	20405265	FEV1/FVC		A	G	0.15	0.15	7.345	2.05e-13	++++--+-++---++-+-++-+++++-++---+-+-+--+-+-++++---	ALHS ALSPAC ARIC_AA ARIC_EA B58C BHS CHSAA CHSEA CKB EPIC EXCEED FHS FinnTwin GS20K H2000 HCHS hunt KORA_F4 KORA_S3 Korcula LBC1936 MESA_AFA_new MESA_CAU_new MESA_HIS_new NEO NFBC66 NFBC86 orcades PIVUS QBB Raine RS1 RS2 RS3 SAPALDIA_Edinburgh SAPALDIA_Gabriel SHIP-1 SHIP-TREND-0 SHIP-TREND-0_B2 Split Twins_UK UKB_AFR UKB_AMR UKB_EAS UKB_EUR UKB_SAS UKHLS VIKING Vis YFS	0.10094	0.104956	0.419439	0.0950153	0.112586	581889	581887	577219	421045	0.2302	0.2347	0.1584	0.1035	0.0035	-0.0004	0.0014	0.0135	0.0013	0.0015	0.0002	0.005	0.007004	0.7886	2.705e-12	0.007498	ITGB8(PoPs,nearest)
ITGB8	rs12700186	FALSE			7_20416711_C_T	7	20416711	FEV1		T	C	0.586	0.414	-6.351	2.14e-10	+---+++----++--+---+----+-+--++-+-+-+++--++---+--	ALHS ALSPAC ARIC_AA ARIC_EA B58C BHS CHSAA CHSEA CKB EPIC EXCEED FHS FinnTwin GS20K H2000 HCHS hunt KORA_F4 KORA_S3 Korcula LBC1936 MESA_AFA_new MESA_CAU_new MESA_HIS_new NEO NFBC66 NFBC86 orcades PIVUS Raine RS1 RS2 RS3 SAPALDIA_Edinburgh SAPALDIA_Gabriel SHIP-1 SHIP-TREND-0 SHIP-TREND-0_B2 Split Twins_UK UKB_AFR UKB_AMR UKB_EAS UKB_EUR UKB_SAS UKHLS VIKING Vis YFS	0.584472	0.689214	0.586864	0.611661	0.760749	581888	581886	577218	421045	0.5854	0.5848	0.5866	0.5929	-0.0055	-0.0036	-0.0008	-0.0087	0.0009	0.0011	0.0001	0.0031	2.398e-09	0.0006993	1.91e-09	0.004993	ITGB8(PoPs,nearest)
IGF2BP3	rs56685747	FALSE			7_23484228_A_G	7	23484228	FEV1	FEV1,FVC	A	G	0.116	0.116	6.662	2.7e-11	++-+++++++++-++++-+-++-+++---+-++++---+++---++++-+	ALHS ALSPAC ARIC_AA ARIC_EA B58C BHS CHSAA CHSEA CKB EPIC EXCEED FHS FinnTwin GS20K H2000 HCHS hunt KORA_F4 KORA_S3 Korcula LBC1936 MESA_AFA_new MESA_CAU_new MESA_HIS_new NEO NFBC66 NFBC86 orcades PIVUS QBB Raine RS1 RS2 RS3 SAPALDIA_Edinburgh SAPALDIA_Gabriel SHIP-1 SHIP-TREND-0 SHIP-TREND-0_B2 Split Twins_UK UKB_AFR UKB_AMR UKB_EAS UKB_EUR UKB_SAS UKHLS VIKING Vis YFS	0.137751	0.0727285	0.0343187	0.0724404	0.0248069	581873	581871	577203	421045	0.1254	0.1243	0.1305	0.1327	0.0091	0.0106	0.0002	0.0227	0.0015	0.0017	0.0002	0.0045	3.398e-10	6.059e-10	0.2392	5.791e-07	FAM126A(mouse_KO), IGF2BP3(nearest), TRA2A(PoPs)
SKAP2	rs3801839	TRUE	rs559233	30804560	7_26833021_A_G	7	26833021	FEV1	PEF,FEV1	A	G	0.488	0.488	-7.102	1.23e-12	-----+----+--+------+-+-------+---+--+-++++----+-	ALHS ALSPAC ARIC_AA ARIC_EA B58C BHS CHSAA CHSEA CKB EPIC EXCEED FHS FinnTwin GS20K H2000 HCHS hunt KORA_F4 KORA_S3 Korcula LBC1936 MESA_AFA_new MESA_CAU_new MESA_HIS_new NEO NFBC66 NFBC86 orcades PIVUS Raine RS1 RS2 RS3 SAPALDIA_Edinburgh SAPALDIA_Gabriel SHIP-1 SHIP-TREND-0 SHIP-TREND-0_B2 Split Twins_UK UKB_AFR UKB_AMR UKB_EAS UKB_EUR UKB_SAS UKHLS VIKING Vis YFS	0.481808	0.191109	0.576749	0.459489	0.53947	581885	581883	577215	421045	0.4926	0.4936	0.4856	0.4758	-0.0064	-0.0064	-0.0005	-0.0174	0.0009	0.0011	0.0001	0.0031	2.238e-12	2.093e-09	0.0003559	1.374e-08	SKAP2(PoPs,nearest), SNX10(rare_disease)
SKAP2	rs1391805	FALSE			7_26896236_A_G	7	26896236	FEV1/FVC		A	G	0.789	0.211	-6.793	1.1e-11	----+-++--+-----++-+--++----+----+----++-------+--	ALHS ALSPAC ARIC_AA ARIC_EA B58C BHS CHSAA CHSEA CKB EPIC EXCEED FHS FinnTwin GS20K H2000 HCHS hunt KORA_F4 KORA_S3 Korcula LBC1936 MESA_AFA_new MESA_CAU_new MESA_HIS_new NEO NFBC66 NFBC86 orcades PIVUS QBB Raine RS1 RS2 RS3 SAPALDIA_Edinburgh SAPALDIA_Gabriel SHIP-1 SHIP-TREND-0 SHIP-TREND-0_B2 Split Twins_UK UKB_AFR UKB_AMR UKB_EAS UKB_EUR UKB_SAS UKHLS VIKING Vis YFS	0.760008	0.701693	0.957996	0.743935	0.871794	581889	581887	577219	421045	0.7681	0.7692	0.7624	0.7529	-0.0055	-0.0027	-0.0011	-0.0202	0.0011	0.0014	0.0002	0.0036	1.377e-06	0.04456	4.92e-12	1.886e-08	HOXA3(PoPs), SKAP2(nearest), SNX10(rare_disease)
HOXA-AS3	rs62454414	TRUE	rs62454414	30804560	7_27182329_G_T	7	27182329	FVC	FEV1,FVC	T	G	0.866	0.134	6.472	9.68e-11	++++++-+++++++++-+-++++++-+-++++--+++--	ALHS ALSPAC ARIC_EA B58C BHS CHSEA EPIC EXCEED FHS FinnTwin GS20K H2000 hunt KORA_F4 KORA_S3 Korcula LBC1936 MESA_CAU_new NEO NFBC66 NFBC86 orcades PIVUS Raine RS1 RS2 RS3 SAPALDIA_Edinburgh SAPALDIA_Gabriel SHIP-1 SHIP-TREND-0 SHIP-TREND-0_B2 Split Twins_UK UKB_EUR UKHLS VIKING Vis YFS	0.870013	0.990774	0.756074	0.879914	0.936768	581880	581878	577210	421045	0.824	0.8212	0.8506	0.8701	0.0056	0.0079	-0.0002	0.0041	0.0013	0.0015	0.0002	0.0046	6.832e-06	6.034e-08	0.2878	0.3717	HOXA-AS3(nearest), HOXA5(PoPs)
JAZF1	rs1635851	FALSE			7_28187806_C_T	7	28187806	FEV1		T	C	0.596	0.404	9.284	1.64e-20	-++++++-++++---++-+++-+-++++-++--+-++++-+--+++++++	ALHS ALSPAC ARIC_AA ARIC_EA B58C BHS CHSAA CHSEA CKB EPIC EXCEED FHS FinnTwin GS20K H2000 HCHS hunt KORA_F4 KORA_S3 Korcula LBC1936 MESA_AFA_new MESA_CAU_new MESA_HIS_new NEO NFBC66 NFBC86 orcades PIVUS QBB Raine RS1 RS2 RS3 SAPALDIA_Edinburgh SAPALDIA_Gabriel SHIP-1 SHIP-TREND-0 SHIP-TREND-0_B2 Split Twins_UK UKB_AFR UKB_AMR UKB_EAS UKB_EUR UKB_SAS UKHLS VIKING Vis YFS	0.585275	0.427449	0.716234	0.679376	0.457552	581886	581884	577216	421045	0.598	0.5988	0.5887	0.5778	0.0078	0.0075	0.0005	0.0258	0.0009	0.0011	0.0001	0.0031	2.163e-17	4.982e-12	0.0001668	8.185e-17	JAZF1(eQTL,nearest), CREB5(PoPs), JAZF1-AS1(eQTL)
JAZF1	rs860262	TRUE	rs1513272	30804560	7_28194397_A_C	7	28194397	FVC	PEF,FVC	A	C	0.452	0.452	8.488	2.11e-17	---++++-++++---+++++++-+++++-++++++++++-+--+++++++	ALHS ALSPAC ARIC_AA ARIC_EA B58C BHS CHSAA CHSEA CKB EPIC EXCEED FHS FinnTwin GS20K H2000 HCHS hunt KORA_F4 KORA_S3 Korcula LBC1936 MESA_AFA_new MESA_CAU_new MESA_HIS_new NEO NFBC66 NFBC86 orcades PIVUS QBB Raine RS1 RS2 RS3 SAPALDIA_Edinburgh SAPALDIA_Gabriel SHIP-1 SHIP-TREND-0 SHIP-TREND-0_B2 Split Twins_UK UKB_AFR UKB_AMR UKB_EAS UKB_EUR UKB_SAS UKHLS VIKING Vis YFS	0.501845	0.219827	0.225743	0.524472	0.269271	581886	581884	577216	421045	0.4541	0.448	0.4783	0.4881	0.0075	0.0081	0.0002	0.0254	0.0009	0.0011	0.0001	0.0031	1.222e-15	6.725e-14	0.1195	1.285e-16	JAZF1(eQTL,nearest), CREB5(PoPs), JAZF1-AS1(eQTL)
CPVL	rs1861116	FALSE			7_29130953_A_C	7	29130953	FEV1/FVC		A	C	0.922	0.078	-6.066	1.31e-09	-+--+------+--?-----+-++-----+-------+--++--+-+-+	ALHS ALSPAC ARIC_AA ARIC_EA B58C BHS CHSAA CHSEA CKB EPIC EXCEED FHS FinnTwin GS20K H2000 HCHS hunt KORA_F4 KORA_S3 Korcula LBC1936 MESA_AFA_new MESA_CAU_new MESA_HIS_new NEO NFBC66 NFBC86 orcades PIVUS Raine RS1 RS2 RS3 SAPALDIA_Edinburgh SAPALDIA_Gabriel SHIP-1 SHIP-TREND-0 SHIP-TREND-0_B2 Split Twins_UK UKB_AFR UKB_AMR UKB_EAS UKB_EUR UKB_SAS UKHLS VIKING Vis YFS	0.940243	0.963777	0.775172	0.973197	0.891056	578099	578097	573429	421045	0.8818	0.8781	0.9101	0.9368	-0.0067	-0.0026	-0.0016	-0.0154	0.0016	0.0019	0.0003	0.0064	4.173e-05	0.1602	5.758e-10	0.01553	CPVL(PoPs,nearest)
PDE1C	rs10266620	FALSE			7_31957550_C_T	7	31957550	FEV1/FVC		T	C	0.821	0.179	-6.064	1.33e-09	+---+-----+-+----+-------+++++-------++-++-+-----+	ALHS ALSPAC ARIC_AA ARIC_EA B58C BHS CHSAA CHSEA CKB EPIC EXCEED FHS FinnTwin GS20K H2000 HCHS hunt KORA_F4 KORA_S3 Korcula LBC1936 MESA_AFA_new MESA_CAU_new MESA_HIS_new NEO NFBC66 NFBC86 orcades PIVUS QBB Raine RS1 RS2 RS3 SAPALDIA_Edinburgh SAPALDIA_Gabriel SHIP-1 SHIP-TREND-0 SHIP-TREND-0_B2 Split Twins_UK UKB_AFR UKB_AMR UKB_EAS UKB_EUR UKB_SAS UKHLS VIKING Vis YFS	0.846707	0.731539	0.668473	0.777463	0.709319	581889	581887	577219	421045	0.8021	0.8001	0.8265	0.8327	-0.0048	-0.0021	-0.001	-0.0163	0.0012	0.0014	0.0002	0.0042	3.95e-05	0.1277	9.954e-09	0.0001001	PDE1C(eQTL,PoPs,nearest)
BBS9	rs6462481	FALSE			7_33510616_C_T	7	33510616	FEV1		T	C	0.239	0.239	-6.074	1.25e-09	-+---++-----+--+-+-+-+--+------+++-+++------------	ALHS ALSPAC ARIC_AA ARIC_EA B58C BHS CHSAA CHSEA CKB EPIC EXCEED FHS FinnTwin GS20K H2000 HCHS hunt KORA_F4 KORA_S3 Korcula LBC1936 MESA_AFA_new MESA_CAU_new MESA_HIS_new NEO NFBC66 NFBC86 orcades PIVUS QBB Raine RS1 RS2 RS3 SAPALDIA_Edinburgh SAPALDIA_Gabriel SHIP-1 SHIP-TREND-0 SHIP-TREND-0_B2 Split Twins_UK UKB_AFR UKB_AMR UKB_EAS UKB_EUR UKB_SAS UKHLS VIKING Vis YFS	0.232004	0.686873	0.233871	0.230761	0.333776	581889	581887	577219	421045	0.242	0.2419	0.2411	0.2368	-0.006	-0.0051	-0.0007	-0.0153	0.0011	0.0012	0.0002	0.0036	1.35e-08	3.591e-05	2.394e-05	2.329e-05	BBS9(PoPs,nearest), BMPER(rare_disease)
LOC401324	rs13234350	FALSE			7_35446584_C_T	7	35446584	PEF		T	C	0.68	0.32	-8.573	1e-17	-------+++++++-++-+-+-	ALSPAC ARIC_AA B58C EPIC FinnTwin hunt LBC1936 orcades Raine RS1 RS2 RS3 SHIP-1 SHIP-TREND-0 SHIP-TREND-0_B2 Split UKB_AFR UKB_AMR UKB_EAS UKB_EUR UKB_SAS VIKING	0.676303	0.926944	0.685268	0.66475	0.58241	581889	581887	577219	421045	0.682	0.6826	0.6779	0.6799	-0.0028	-0.0032	-0.0002	-0.0279	0.001	0.0011	0.0001	0.0033	0.004274	0.004485	0.198	1.539e-17	LOC401324(nearest), TBX20(PoPs)
POU6F2	rs3923295	FALSE			7_39308521_A_G	7	39308521	FEV1	FEV1,FVC	A	G	0.778	0.222	-6.338	2.33e-10	--+---+-----+----+-----+----+++--++-----+-+---+-+	ALHS ALSPAC ARIC_AA ARIC_EA B58C BHS CHSAA CHSEA CKB EPIC EXCEED FHS FinnTwin GS20K H2000 HCHS hunt KORA_F4 KORA_S3 Korcula LBC1936 MESA_AFA_new MESA_CAU_new MESA_HIS_new NEO NFBC66 NFBC86 orcades PIVUS Raine RS1 RS2 RS3 SAPALDIA_Edinburgh SAPALDIA_Gabriel SHIP-1 SHIP-TREND-0 SHIP-TREND-0_B2 Split Twins_UK UKB_AFR UKB_AMR UKB_EAS UKB_EUR UKB_SAS UKHLS VIKING Vis YFS	0.777291	0.549979	0.818133	0.728146	0.663976	581889	581887	577219	421045	0.7747	0.7757	0.7715	0.7736	-0.0064	-0.008	0	-0.0057	0.0011	0.0013	0.0002	0.0037	4.695e-09	5.022e-10	0.7535	0.1191	POU6F2(PoPs,nearest)
SUGCT	rs17770991	FALSE			7_40847221_C_T	7	40847221	FVC	FEV1,FVC	T	C	0.456	0.456	-6.524	6.83e-11	-+-+-------+-+--+---++---------+---+-+-++---++--+	ALHS ALSPAC ARIC_AA ARIC_EA B58C BHS CHSAA CHSEA CKB EPIC EXCEED FHS FinnTwin GS20K H2000 HCHS hunt KORA_F4 KORA_S3 Korcula LBC1936 MESA_AFA_new MESA_CAU_new MESA_HIS_new NEO NFBC66 NFBC86 orcades PIVUS Raine RS1 RS2 RS3 SAPALDIA_Edinburgh SAPALDIA_Gabriel SHIP-1 SHIP-TREND-0 SHIP-TREND-0_B2 Split Twins_UK UKB_AFR UKB_AMR UKB_EAS UKB_EUR UKB_SAS UKHLS VIKING Vis YFS	0.459543	0.219758	0.480155	0.551606	0.541466	581889	581887	577219	421045	0.4561	0.4554	0.4575	0.4518	-0.005	-0.0061	0	-0.0053	0.0009	0.0011	0.0001	0.0031	2.809e-08	6.161e-09	0.9948	0.08534	SUGCT(PoPs,nearest)
LINC01450	rs6974297	FALSE			7_41044183_C_G	7	41044183	FEV1	FEV1,FVC	C	G	0.429	0.429	-6.438	1.21e-10	-++--+++--+-+-+-+++--++----+---+-+--++--+-+-+-+-+	ALHS ALSPAC ARIC_AA ARIC_EA B58C BHS CHSAA CHSEA CKB EPIC EXCEED FHS FinnTwin GS20K H2000 HCHS hunt KORA_F4 KORA_S3 Korcula LBC1936 MESA_AFA_new MESA_CAU_new MESA_HIS_new NEO NFBC66 NFBC86 orcades PIVUS Raine RS1 RS2 RS3 SAPALDIA_Edinburgh SAPALDIA_Gabriel SHIP-1 SHIP-TREND-0 SHIP-TREND-0_B2 Split Twins_UK UKB_AFR UKB_AMR UKB_EAS UKB_EUR UKB_SAS UKHLS VIKING Vis YFS	0.443282	0.167681	0.392021	0.361262	0.444938	581881	581879	577211	421045	0.4251	0.4235	0.4317	0.4326	-0.0047	-0.0055	-0.0001	-0.0151	0.0009	0.0011	0.0001	0.0031	3.006e-07	2.9e-07	0.3165	9.444e-07	LINC01450(nearest), SUGCT(PoPs)
LINC01449	rs29503	FALSE			7_41198897_G_T	7	41198897	FVC		T	G	0.555	0.445	-5.947	2.73e-09	----------+-+--+----+-++------+--+-+--+-+-+-+----	ALHS ALSPAC ARIC_AA ARIC_EA B58C BHS CHSAA CHSEA CKB EPIC EXCEED FHS FinnTwin GS20K H2000 HCHS hunt KORA_F4 KORA_S3 Korcula LBC1936 MESA_AFA_new MESA_CAU_new MESA_HIS_new NEO NFBC66 NFBC86 orcades PIVUS Raine RS1 RS2 RS3 SAPALDIA_Edinburgh SAPALDIA_Gabriel SHIP-1 SHIP-TREND-0 SHIP-TREND-0_B2 Split Twins_UK UKB_AFR UKB_AMR UKB_EAS UKB_EUR UKB_SAS UKHLS VIKING Vis YFS	0.555215	0.38526	0.530657	0.55999	0.684716	581888	581886	577218	421045	0.5546	0.5546	0.5561	0.5488	-0.0046	-0.0065	0.0001	-0.0066	0.0009	0.0011	0.0001	0.0031	4.027e-07	1.278e-09	0.5666	0.03219	LINC01449(nearest), SUGCT(PoPs)
GLI3	rs10951676	FALSE			7_42272097_A_G	7	42272097	FVC	FEV1,FVC	A	G	0.667	0.333	-6.478	9.3e-11	---+--+------+----+---+----+----++-+---+-++--+++-	ALHS ALSPAC ARIC_AA ARIC_EA B58C BHS CHSAA CHSEA CKB EPIC EXCEED FHS FinnTwin GS20K H2000 HCHS hunt KORA_F4 KORA_S3 Korcula LBC1936 MESA_AFA_new MESA_CAU_new MESA_HIS_new NEO NFBC66 NFBC86 orcades PIVUS Raine RS1 RS2 RS3 SAPALDIA_Edinburgh SAPALDIA_Gabriel SHIP-1 SHIP-TREND-0 SHIP-TREND-0_B2 Split Twins_UK UKB_AFR UKB_AMR UKB_EAS UKB_EUR UKB_SAS UKHLS VIKING Vis YFS	0.634616	0.773002	0.843047	0.543333	0.73702	581888	581886	577218	421045	0.6607	0.6633	0.6459	0.6418	-0.0059	-0.0076	0	-0.0143	0.001	0.0012	0.0001	0.0032	3.478e-09	1.054e-10	0.9339	7.973e-06	GLI3(eQTL,PoPs,credible,nearest)
CAMK2B	rs1065359	FALSE			7_44259706_A_G	7	44259706	FVC	FEV1,FVC	A	G	0.415	0.415	6.57	5.02e-11	++++++-+++-+++++-+--+++--+-++-++-+++-++-++-+-+++-	ALHS ALSPAC ARIC_AA ARIC_EA B58C BHS CHSAA CHSEA CKB EPIC EXCEED FHS FinnTwin GS20K H2000 HCHS hunt KORA_F4 KORA_S3 Korcula LBC1936 MESA_AFA_new MESA_CAU_new MESA_HIS_new NEO NFBC66 NFBC86 orcades PIVUS Raine RS1 RS2 RS3 SAPALDIA_Edinburgh SAPALDIA_Gabriel SHIP-1 SHIP-TREND-0 SHIP-TREND-0_B2 Split Twins_UK UKB_AFR UKB_AMR UKB_EAS UKB_EUR UKB_SAS UKHLS VIKING Vis YFS	0.42414	0.172667	0.379729	0.433916	0.441515	581889	581887	577219	421045	0.4104	0.4093	0.4182	0.417	0.0054	0.0068	0	0.0063	0.0009	0.0011	0.0001	0.0031	6.439e-09	2.458e-10	0.8793	0.0425	AEBP1(PoPs), CAMK2B(nearest)
IGFBP3	rs10246341	FALSE			7_46056073_C_T	7	46056073	FEV1		T	C	0.135	0.135	5.958	2.56e-09	-++-+-+++++--++-+--+++-+++++++-++++++-++++-++++++	ALHS ALSPAC ARIC_AA ARIC_EA B58C BHS CHSAA CHSEA CKB EPIC EXCEED FHS FinnTwin GS20K H2000 HCHS hunt KORA_F4 KORA_S3 Korcula LBC1936 MESA_AFA_new MESA_CAU_new MESA_HIS_new NEO NFBC66 NFBC86 orcades PIVUS Raine RS1 RS2 RS3 SAPALDIA_Edinburgh SAPALDIA_Gabriel SHIP-1 SHIP-TREND-0 SHIP-TREND-0_B2 Split Twins_UK UKB_AFR UKB_AMR UKB_EAS UKB_EUR UKB_SAS UKHLS VIKING Vis YFS	0.129513	0.184294	0.209646	0.077198	0.158926	581889	581887	577219	421045	0.1402	0.1415	0.1342	0.1289	0.0076	0.0081	0.0003	0.0054	0.0013	0.0015	0.0002	0.0046	9.152e-09	1.574e-07	0.139	0.2379	IGFBP3(PoPs,nearest)
IGFBP3	rs17232687	TRUE	rs17232687	30804560	7_46448518_C_T	7	46448518	FEV1	FEV1,FVC	T	C	0.541	0.459	-8.324	8.49e-17	--+--+++-------------+-++----?-+-+-+++---------++-	ALHS ALSPAC ARIC_AA ARIC_EA B58C BHS CHSAA CHSEA CKB EPIC EXCEED FHS FinnTwin GS20K H2000 HCHS hunt KORA_F4 KORA_S3 Korcula LBC1936 MESA_AFA_new MESA_CAU_new MESA_HIS_new NEO NFBC66 NFBC86 orcades PIVUS QBB Raine RS1 RS2 RS3 SAPALDIA_Edinburgh SAPALDIA_Gabriel SHIP-1 SHIP-TREND-0 SHIP-TREND-0_B2 Split Twins_UK UKB_AFR UKB_AMR UKB_EAS UKB_EUR UKB_SAS UKHLS VIKING Vis YFS	0.495432	0.851536	0.76057	0.538406	0.702515	570343	570341	565673	421045	0.5398	0.543	0.5143	0.5071	-0.0076	-0.0085	-0.0002	-0.0124	0.0009	0.0011	0.0001	0.0031	3.16e-16	8.023e-15	0.08918	5.633e-05	IGFBP3(PoPs,nearest)
AUTS2	rs62455217	FALSE			7_69905700_C_T	7	69905700	FVC		T	C	0.0513	0.0513	6.564	5.22e-11	--++++-+?+++-++++-++-+-++++++?+--+-+-++++++-+-+-+-	ALHS ALSPAC ARIC_AA ARIC_EA B58C BHS CHSAA CHSEA CKB EPIC EXCEED FHS FinnTwin GS20K H2000 HCHS hunt KORA_F4 KORA_S3 Korcula LBC1936 MESA_AFA_new MESA_CAU_new MESA_HIS_new NEO NFBC66 NFBC86 orcades PIVUS QBB Raine RS1 RS2 RS3 SAPALDIA_Edinburgh SAPALDIA_Gabriel SHIP-1 SHIP-TREND-0 SHIP-TREND-0_B2 Split Twins_UK UKB_AFR UKB_AMR UKB_EAS UKB_EUR UKB_SAS UKHLS VIKING Vis YFS	0.0514533	0.00448193	0.00144301	0.026746	0.0118083	485035	485033	480365	419481	0.057	0.0573	0.0565	0.0506	0.0102	0.0164	-0.0007	0.0031	0.0023	0.0027	0.0003	0.0072	9.911e-06	1.903e-09	0.03023	0.668	AUTS2(PoPs,nearest)
FZD9	rs42121	FALSE			7_72842267_C_T	7	72842267	FEV1		T	C	0.104	0.104	6.244	4.26e-10	-+++++--++++-+??++-+-?+?+++-+?--++-+-+++++--+-+-+-	ALHS ALSPAC ARIC_AA ARIC_EA B58C BHS CHSAA CHSEA CKB EPIC EXCEED FHS FinnTwin GS20K H2000 HCHS hunt KORA_F4 KORA_S3 Korcula LBC1936 MESA_AFA_new MESA_CAU_new MESA_HIS_new NEO NFBC66 NFBC86 orcades PIVUS QBB Raine RS1 RS2 RS3 SAPALDIA_Edinburgh SAPALDIA_Gabriel SHIP-1 SHIP-TREND-0 SHIP-TREND-0_B2 Split Twins_UK UKB_AFR UKB_AMR UKB_EAS UKB_EUR UKB_SAS UKHLS VIKING Vis YFS	0.122125	0.0125454	0.0063713	0.0787334	0.022279	553669	553667	548999	408267	0.1226	0.1228	0.1231	0.1209	0.0088	0.0071	0.0008	0.0126	0.0016	0.0019	0.0002	0.0049	6.459e-08	0.0002161	0.0003791	0.009672	BAZ1B(PoPs), FZD9(nearest), NCF1B(mouse_KO)
ELN	rs1091812	FALSE			7_73490656_A_C	7	73490656	FEV1/FVC		A	C	0.268	0.268	7.283	3.26e-13	--+++++-++-+-++++-++++-++-+++++++-++++++-++-++++-+	ALHS ALSPAC ARIC_AA ARIC_EA B58C BHS CHSAA CHSEA CKB EPIC EXCEED FHS FinnTwin GS20K H2000 HCHS hunt KORA_F4 KORA_S3 Korcula LBC1936 MESA_AFA_new MESA_CAU_new MESA_HIS_new NEO NFBC66 NFBC86 orcades PIVUS QBB Raine RS1 RS2 RS3 SAPALDIA_Edinburgh SAPALDIA_Gabriel SHIP-1 SHIP-TREND-0 SHIP-TREND-0_B2 Split Twins_UK UKB_AFR UKB_AMR UKB_EAS UKB_EUR UKB_SAS UKHLS VIKING Vis YFS	0.287313	0.533562	0.144753	0.247633	0.304654	581887	581885	577217	421045	0.2721	0.2704	0.2828	0.2963	0.0021	-0.0011	0.001	0.0097	0.001	0.0012	0.0001	0.0034	0.04528	0.3787	9.276e-11	0.004119	ELN(PoPs,nearest), DNAJC30(eQTL), WBSCR22(eQTL)
SEMA3A	rs797834	FALSE			7_83579269_A_G	7	83579269	FVC		A	G	0.777	0.223	-5.948	2.71e-09	-----+-+-++-----------+--------+------+--+--+-++-	ALHS ALSPAC ARIC_AA ARIC_EA B58C BHS CHSAA CHSEA CKB EPIC EXCEED FHS FinnTwin GS20K H2000 HCHS hunt KORA_F4 KORA_S3 Korcula LBC1936 MESA_AFA_new MESA_CAU_new MESA_HIS_new NEO NFBC66 NFBC86 orcades PIVUS Raine RS1 RS2 RS3 SAPALDIA_Edinburgh SAPALDIA_Gabriel SHIP-1 SHIP-TREND-0 SHIP-TREND-0_B2 Split Twins_UK UKB_AFR UKB_AMR UKB_EAS UKB_EUR UKB_SAS UKHLS VIKING Vis YFS	0.762356	0.978829	0.902114	0.719773	0.720923	581888	581886	577218	421045	0.7716	0.7727	0.7624	0.7542	-0.0052	-0.0075	0.0002	-0.0038	0.0011	0.0013	0.0002	0.0036	2.831e-06	7.953e-09	0.2261	0.2964	SEMA3A(eQTL,PoPs,nearest)
LOC101927378	7:84119431_AG_A	FALSE			7_84119431_A_AG	7	84119431	PEF		A	AG	0.221	0.221	8.242	1.69e-16	?-???+??????????-+++-?	ALSPAC ARIC_AA B58C EPIC FinnTwin hunt LBC1936 orcades Raine RS1 RS2 RS3 SHIP-1 SHIP-TREND-0 SHIP-TREND-0_B2 Split UKB_AFR UKB_AMR UKB_EAS UKB_EUR UKB_SAS VIKING	0.220285	0.364805	0.150036	0.236001	0.118392	464518	464518	464518	365467	0.2086	0.2071	0.2171	0.2213	0.0084	0.0082	0.0007	0.0354	0.0013	0.0015	0.0002	0.0042	3.93e-11	3.365e-08	0.000185	2.085e-17	LOC101927378(nearest), SEMA3A(PoPs)
SEMA3D	rs1534572	TRUE	rs12707691	30804560	7_84555234_A_G	7	84555234	FEV1	FEV1,FVC	A	G	0.649	0.351	-8.956	3.38e-19	---+--+-----+-----+-+-++---------++-++---++--+----	ALHS ALSPAC ARIC_AA ARIC_EA B58C BHS CHSAA CHSEA CKB EPIC EXCEED FHS FinnTwin GS20K H2000 HCHS hunt KORA_F4 KORA_S3 Korcula LBC1936 MESA_AFA_new MESA_CAU_new MESA_HIS_new NEO NFBC66 NFBC86 orcades PIVUS QBB Raine RS1 RS2 RS3 SAPALDIA_Edinburgh SAPALDIA_Gabriel SHIP-1 SHIP-TREND-0 SHIP-TREND-0_B2 Split Twins_UK UKB_AFR UKB_AMR UKB_EAS UKB_EUR UKB_SAS UKHLS VIKING Vis YFS	0.648674	0.422472	0.658724	0.687516	0.735395	581889	581887	577219	421045	0.648	0.648	0.6486	0.651	-0.008	-0.0079	-0.0006	-0.0224	0.0009	0.0011	0.0001	0.0032	2.674e-17	1.588e-12	2.844e-05	2.323e-12	SEMA3D(PoPs,nearest), SEMA3A(eQTL)
DYNC1I1	rs12540849	FALSE			7_95606624_A_C	7	95606624	FVC		A	C	0.241	0.241	7.267	3.67e-13	-+++++--++-+-++++++++---++---+-++++-+--++++++-++-+	ALHS ALSPAC ARIC_AA ARIC_EA B58C BHS CHSAA CHSEA CKB EPIC EXCEED FHS FinnTwin GS20K H2000 HCHS hunt KORA_F4 KORA_S3 Korcula LBC1936 MESA_AFA_new MESA_CAU_new MESA_HIS_new NEO NFBC66 NFBC86 orcades PIVUS QBB Raine RS1 RS2 RS3 SAPALDIA_Edinburgh SAPALDIA_Gabriel SHIP-1 SHIP-TREND-0 SHIP-TREND-0_B2 Split Twins_UK UKB_AFR UKB_AMR UKB_EAS UKB_EUR UKB_SAS UKHLS VIKING Vis YFS	0.257968	0.365511	0.122609	0.192638	0.215624	581879	581877	577209	421045	0.2457	0.244	0.2537	0.2657	0.0053	0.0088	-0.0004	0.0032	0.0011	0.0013	0.0002	0.0035	1.086e-06	6.774e-12	0.009464	0.3653	DYNC1I1(PoPs,nearest)
ZKSCAN1	rs12531809	TRUE	rs72615157	28166213	7_99620473_G_T	7	99620473	FEV1/FVC		T	G	0.377	0.377	11.671	1.79e-31	+--++++++++++++++-++-+++++++-+++--++--++-+++++++++	ALHS ALSPAC ARIC_AA ARIC_EA B58C BHS CHSAA CHSEA CKB EPIC EXCEED FHS FinnTwin GS20K H2000 HCHS hunt KORA_F4 KORA_S3 Korcula LBC1936 MESA_AFA_new MESA_CAU_new MESA_HIS_new NEO NFBC66 NFBC86 orcades PIVUS QBB Raine RS1 RS2 RS3 SAPALDIA_Edinburgh SAPALDIA_Gabriel SHIP-1 SHIP-TREND-0 SHIP-TREND-0_B2 Split Twins_UK UKB_AFR UKB_AMR UKB_EAS UKB_EUR UKB_SAS UKHLS VIKING Vis YFS	0.366831	0.0958753	0.411203	0.433073	0.387231	581887	581885	577217	421045	0.3833	0.3836	0.3741	0.3628	0.0039	-0.0012	0.0016	0.0155	0.0009	0.0011	0.0001	0.0032	2.753e-05	0.2796	4.989e-31	1.125e-06	AP4M1(PoPs), ZKSCAN1(nearest)
MYL10	rs2462336	FALSE			7_101365461_C_T	7	101365461	FEV1/FVC		T	C	0.182	0.182	-6.234	4.56e-10	----+++--++-++----+--+--------++----+-+-+-----+--	ALHS ALSPAC ARIC_AA ARIC_EA B58C BHS CHSAA CHSEA CKB EPIC EXCEED FHS FinnTwin GS20K H2000 HCHS hunt KORA_F4 KORA_S3 Korcula LBC1936 MESA_AFA_new MESA_CAU_new MESA_HIS_new NEO NFBC66 NFBC86 orcades PIVUS Raine RS1 RS2 RS3 SAPALDIA_Edinburgh SAPALDIA_Gabriel SHIP-1 SHIP-TREND-0 SHIP-TREND-0_B2 Split Twins_UK UKB_AFR UKB_AMR UKB_EAS UKB_EUR UKB_SAS UKHLS VIKING Vis YFS	0.16412	0.400072	0.248249	0.126186	0.165347	581859	581857	577189	421045	0.1998	0.2035	0.1823	0.1697	-0.0025	0.0014	-0.0011	-0.0107	0.0012	0.0014	0.0002	0.0041	0.03219	0.2876	2.266e-10	0.009732	CUX1(PoPs), MYL10(nearest)
SRPK2	rs10266871	FALSE			7_104812129_A_G	7	104812129	PEF	PEF,FEV1	A	G	0.346	0.346	-7.45	9.31e-14	+---+-+--+-+++--+----+	ALSPAC ARIC_AA B58C EPIC FinnTwin hunt LBC1936 orcades Raine RS1 RS2 RS3 SHIP-1 SHIP-TREND-0 SHIP-TREND-0_B2 Split UKB_AFR UKB_AMR UKB_EAS UKB_EUR UKB_SAS VIKING	0.350711	0.210325	0.280714	0.311137	0.224572	581889	581887	577219	421045	0.3357	0.3349	0.3418	0.3429	-0.0062	-0.0051	-0.0005	-0.0244	0.001	0.0011	0.0001	0.0032	7.832e-11	5.515e-06	0.0001454	2.958e-14	KMT2E(PoPs), SRPK2(nearest)
PIK3CG	rs2392929	FALSE			7_106414069_G_T	7	106414069	FEV1/FVC		T	G	0.809	0.191	5.905	3.53e-09	+-+++--++-+++-+-+-++---+--+-++++-++++-++-+++++-+-+	ALHS ALSPAC ARIC_AA ARIC_EA B58C BHS CHSAA CHSEA CKB EPIC EXCEED FHS FinnTwin GS20K H2000 HCHS hunt KORA_F4 KORA_S3 Korcula LBC1936 MESA_AFA_new MESA_CAU_new MESA_HIS_new NEO NFBC66 NFBC86 orcades PIVUS QBB Raine RS1 RS2 RS3 SAPALDIA_Edinburgh SAPALDIA_Gabriel SHIP-1 SHIP-TREND-0 SHIP-TREND-0_B2 Split Twins_UK UKB_AFR UKB_AMR UKB_EAS UKB_EUR UKB_SAS UKHLS VIKING Vis YFS	0.801781	0.947362	0.830243	0.79664	0.687588	581876	581874	577206	421045	0.8052	0.8061	0.7996	0.8025	0.0018	-0.0021	0.0011	0.0155	0.0012	0.0013	0.0002	0.0038	0.1203	0.1167	6.108e-12	5.204e-05	CCDC71L(PoPs), COG5(eQTL), PIK3CG(nearest)
MET	rs193686	TRUE	rs193686	30804560	7_116431427_C_T	7	116431427	FEV1/FVC		T	C	0.716	0.284	-7.121	1.07e-12	-+------+---+------+-----+----++-----+---+-----++-	ALHS ALSPAC ARIC_AA ARIC_EA B58C BHS CHSAA CHSEA CKB EPIC EXCEED FHS FinnTwin GS20K H2000 HCHS hunt KORA_F4 KORA_S3 Korcula LBC1936 MESA_AFA_new MESA_CAU_new MESA_HIS_new NEO NFBC66 NFBC86 orcades PIVUS QBB Raine RS1 RS2 RS3 SAPALDIA_Edinburgh SAPALDIA_Gabriel SHIP-1 SHIP-TREND-0 SHIP-TREND-0_B2 Split Twins_UK UKB_AFR UKB_AMR UKB_EAS UKB_EUR UKB_SAS UKHLS VIKING Vis YFS	0.681539	0.572916	0.88851	0.719522	0.838581	581889	581887	577219	421045	0.7018	0.7047	0.6895	0.6759	-0.0032	0.0005	-0.001	-0.0094	0.001	0.0012	0.0001	0.0033	0.001865	0.664	1.802e-12	0.004313	MET(eQTL,nearest), CAPZA2(eQTL), CAV1(PoPs)
CTTNBP2	rs62617115	FALSE			7_117375374_A_C	7	117375374	FEV1/FVC		A	C	0.963	0.037	-6.017	1.78e-09	--?--+?-?------------?+--+-+---++--+++-+?+?---+--	ALHS ALSPAC ARIC_AA ARIC_EA B58C BHS CHSAA CHSEA CKB EPIC EXCEED FHS FinnTwin GS20K H2000 HCHS hunt KORA_F4 KORA_S3 Korcula LBC1936 MESA_AFA_new MESA_CAU_new MESA_HIS_new NEO NFBC66 NFBC86 orcades PIVUS Raine RS1 RS2 RS3 SAPALDIA_Edinburgh SAPALDIA_Gabriel SHIP-1 SHIP-TREND-0 SHIP-TREND-0_B2 Split Twins_UK UKB_AFR UKB_AMR UKB_EAS UKB_EUR UKB_SAS UKHLS VIKING Vis YFS	0.962697	0.997279	1	0.973553	0.989227	496584	496582	491914	419481	0.9631	0.9631	0.963	0.9632	-0.0142	-0.0092	-0.002	-0.0459	0.0027	0.0032	0.0004	0.0082	1.484e-07	0.004085	2.796e-08	1.899e-08	CFTR(rare_disease,PoPs), CTTNBP2(eQTL,nearest)
CALD1	rs1452909	FALSE			7_134566071_A_G	7	134566071	FEV1/FVC		A	G	0.226	0.226	-7.062	1.64e-12	-------------+---+++-+--+++++-+++-+-++-----+---+--	ALHS ALSPAC ARIC_AA ARIC_EA B58C BHS CHSAA CHSEA CKB EPIC EXCEED FHS FinnTwin GS20K H2000 HCHS hunt KORA_F4 KORA_S3 Korcula LBC1936 MESA_AFA_new MESA_CAU_new MESA_HIS_new NEO NFBC66 NFBC86 orcades PIVUS QBB Raine RS1 RS2 RS3 SAPALDIA_Edinburgh SAPALDIA_Gabriel SHIP-1 SHIP-TREND-0 SHIP-TREND-0_B2 Split Twins_UK UKB_AFR UKB_AMR UKB_EAS UKB_EUR UKB_SAS UKHLS VIKING Vis YFS	0.251103	0.402156	0.0744421	0.255054	0.209195	581889	581887	577219	421045	0.2388	0.2379	0.2482	0.2497	-0.002	0.0022	-0.0012	-0.0123	0.0011	0.0013	0.0002	0.0035	0.06588	0.09626	1.169e-13	0.0005004	CALD1(PoPs,nearest)
TBXAS1	rs2041334	FALSE			7_139504611_C_G	7	139504611	FEV1		C	G	0.367	0.367	-6.054	1.41e-09	--+--------++-----+----+--+++-+---++--+------+-+--	ALHS ALSPAC ARIC_AA ARIC_EA B58C BHS CHSAA CHSEA CKB EPIC EXCEED FHS FinnTwin GS20K H2000 HCHS hunt KORA_F4 KORA_S3 Korcula LBC1936 MESA_AFA_new MESA_CAU_new MESA_HIS_new NEO NFBC66 NFBC86 orcades PIVUS QBB Raine RS1 RS2 RS3 SAPALDIA_Edinburgh SAPALDIA_Gabriel SHIP-1 SHIP-TREND-0 SHIP-TREND-0_B2 Split Twins_UK UKB_AFR UKB_AMR UKB_EAS UKB_EUR UKB_SAS UKHLS VIKING Vis YFS	0.431936	0.123599	0.054673	0.417178	0.243691	581873	581871	577203	421045	0.4068	0.4049	0.4193	0.4316	-0.0058	-0.0052	-0.0005	-0.0088	0.001	0.0012	0.0001	0.0031	6.362e-09	1.039e-05	0.0002226	0.004739	HIPK2(PoPs), PARP12(mouse_KO), TBXAS1(nearest)
BRAF	rs13227429	FALSE			7_140560023_C_T	7	140560023	FVC		T	C	0.515	0.485	7.704	1.32e-14	+++++--+++-++++++++++++++++-++-++----++++++++-++--	ALHS ALSPAC ARIC_AA ARIC_EA B58C BHS CHSAA CHSEA CKB EPIC EXCEED FHS FinnTwin GS20K H2000 HCHS hunt KORA_F4 KORA_S3 Korcula LBC1936 MESA_AFA_new MESA_CAU_new MESA_HIS_new NEO NFBC66 NFBC86 orcades PIVUS QBB Raine RS1 RS2 RS3 SAPALDIA_Edinburgh SAPALDIA_Gabriel SHIP-1 SHIP-TREND-0 SHIP-TREND-0_B2 Split Twins_UK UKB_AFR UKB_AMR UKB_EAS UKB_EUR UKB_SAS UKHLS VIKING Vis YFS	0.436201	0.965643	0.82937	0.598804	0.782394	581881	581879	577211	421045	0.4997	0.5048	0.4674	0.4543	0.0054	0.0082	-0.0003	0.0047	0.001	0.0011	0.0001	0.0031	1.835e-08	3.197e-13	0.03862	0.1352	BRAF(eQTL,PoPs,nearest), MRPS33(eQTL), TMEM178B(eQTL)
AOC1	rs6977081	FALSE			7_150542515_G_T	7	150542515	FVC		T	G	0.394	0.394	5.939	2.87e-09	+++++++++++++++++-++---+++++-+-+-+++-++---+++-+-+-	ALHS ALSPAC ARIC_AA ARIC_EA B58C BHS CHSAA CHSEA CKB EPIC EXCEED FHS FinnTwin GS20K H2000 HCHS hunt KORA_F4 KORA_S3 Korcula LBC1936 MESA_AFA_new MESA_CAU_new MESA_HIS_new NEO NFBC66 NFBC86 orcades PIVUS QBB Raine RS1 RS2 RS3 SAPALDIA_Edinburgh SAPALDIA_Gabriel SHIP-1 SHIP-TREND-0 SHIP-TREND-0_B2 Split Twins_UK UKB_AFR UKB_AMR UKB_EAS UKB_EUR UKB_SAS UKHLS VIKING Vis YFS	0.332612	0.596985	0.659721	0.455753	0.511434	581889	581887	577219	421045	0.4066	0.415	0.3652	0.3432	0.0045	0.0061	-0.0001	0.0076	0.001	0.0011	0.0001	0.0033	3.634e-06	5.275e-08	0.7211	0.0199	AOC1(nearest), ATG9B(eQTL), FASTK(PoPs)
SHH	rs1233557	FALSE			7_155601653_A_C	7	155601653	FEV1/FVC		A	C	0.065	0.065	6.736	1.63e-11	+-+-+--+++--++++++-+++---+++--+--+--+++++++++++++	ALHS ALSPAC ARIC_AA ARIC_EA B58C BHS CHSAA CHSEA CKB EPIC EXCEED FHS FinnTwin GS20K H2000 HCHS hunt KORA_F4 KORA_S3 Korcula LBC1936 MESA_AFA_new MESA_CAU_new MESA_HIS_new NEO NFBC66 NFBC86 orcades PIVUS Raine RS1 RS2 RS3 SAPALDIA_Edinburgh SAPALDIA_Gabriel SHIP-1 SHIP-TREND-0 SHIP-TREND-0_B2 Split Twins_UK UKB_AFR UKB_AMR UKB_EAS UKB_EUR UKB_SAS UKHLS VIKING Vis YFS	0.069244	0.1325	0.023088	0.074625	0.045944	581881	581879	577211	421045	0.0741	0.0733	0.0736	0.0806	0.0038	-0.0027	0.0018	0.0149	0.0019	0.0023	0.0003	0.0061	0.0502	0.2327	2.88e-11	0.01478	SHH(PoPs,nearest), RBM33(WES)
LOC285889	rs12698403	TRUE	rs12698403	28166213	7_156127246_A_G	7	156127246	FEV1	PEF,FEV1,FVC,FF	A	G	0.422	0.422	-12.875	6.22e-38	-+----++----+--------+------+--------+-+-------+--	ALHS ALSPAC ARIC_AA ARIC_EA B58C BHS CHSAA CHSEA CKB EPIC EXCEED FHS FinnTwin GS20K H2000 HCHS hunt KORA_F4 KORA_S3 Korcula LBC1936 MESA_AFA_new MESA_CAU_new MESA_HIS_new NEO NFBC66 NFBC86 orcades PIVUS QBB Raine RS1 RS2 RS3 SAPALDIA_Edinburgh SAPALDIA_Gabriel SHIP-1 SHIP-TREND-0 SHIP-TREND-0_B2 Split Twins_UK UKB_AFR UKB_AMR UKB_EAS UKB_EUR UKB_SAS UKHLS VIKING Vis YFS	0.441854	0.274079	0.31096	0.328322	0.482858	581883	581881	577213	421045	0.4204	0.4182	0.4342	0.4356	-0.0111	-0.0083	-0.0013	-0.0316	0.0009	0.0011	0.0001	0.0031	7.878e-33	2.252e-14	9.328e-23	1.939e-24	LMBR1(PoPs), LOC285889(nearest)
MFHAS1	rs9987313	FALSE			8_8756751_A_T	8	8756751	FEV1/FVC		A	T	0.449	0.449	-5.897	3.71e-09	--+---+-------+----+---+--+-+--+--+-+-+-----+---+	ALHS ALSPAC ARIC_AA ARIC_EA B58C BHS CHSAA CHSEA CKB EPIC EXCEED FHS FinnTwin GS20K H2000 HCHS hunt KORA_F4 KORA_S3 Korcula LBC1936 MESA_AFA_new MESA_CAU_new MESA_HIS_new NEO NFBC66 NFBC86 orcades PIVUS Raine RS1 RS2 RS3 SAPALDIA_Edinburgh SAPALDIA_Gabriel SHIP-1 SHIP-TREND-0 SHIP-TREND-0_B2 Split Twins_UK UKB_AFR UKB_AMR UKB_EAS UKB_EUR UKB_SAS UKHLS VIKING Vis YFS	0.451161	0.209573	0.405341	0.402242	0.369179	581881	581879	577211	420633	0.4478	0.448	0.4476	0.4438	-0.0044	-0.0016	-0.0009	-0.0111	0.0009	0.0011	0.0001	0.0031	1.167e-06	0.1265	1.873e-12	0.0003514	MFHAS1(PoPs,nearest)
MFHAS1	rs419425	FALSE			8_8771339_A_G	8	8771339	FEV1		A	G	0.628	0.372	8.227	1.91e-16	++++++-+++++++++++-----++--+-+-+-++-+++++--++-++--	ALHS ALSPAC ARIC_AA ARIC_EA B58C BHS CHSAA CHSEA CKB EPIC EXCEED FHS FinnTwin GS20K H2000 HCHS hunt KORA_F4 KORA_S3 Korcula LBC1936 MESA_AFA_new MESA_CAU_new MESA_HIS_new NEO NFBC66 NFBC86 orcades PIVUS QBB Raine RS1 RS2 RS3 SAPALDIA_Edinburgh SAPALDIA_Gabriel SHIP-1 SHIP-TREND-0 SHIP-TREND-0_B2 Split Twins_UK UKB_AFR UKB_AMR UKB_EAS UKB_EUR UKB_SAS UKHLS VIKING Vis YFS	0.716346	0.847646	0.173274	0.783953	0.561475	581887	581885	577217	420633	0.6353	0.6265	0.6819	0.7109	0.0079	0.0054	0.0011	0.0167	0.001	0.0012	0.0001	0.0034	2.761e-14	9.371e-06	2.67e-13	8.584e-07	MFHAS1(PoPs,nearest), RP11-10A14.5(eQTL), RP11-62H7.2(eQTL)
PPP1R3B	rs330937	TRUE	rs330939	30804560	8_9016482_C_G	8	9016482	FEV1/FVC		C	G	0.578	0.422	10.704	9.73e-27	++++-+++++-++++-++-+++-+--++++++--++++-++-+-++++++	ALHS ALSPAC ARIC_AA ARIC_EA B58C BHS CHSAA CHSEA CKB EPIC EXCEED FHS FinnTwin GS20K H2000 HCHS hunt KORA_F4 KORA_S3 Korcula LBC1936 MESA_AFA_new MESA_CAU_new MESA_HIS_new NEO NFBC66 NFBC86 orcades PIVUS QBB Raine RS1 RS2 RS3 SAPALDIA_Edinburgh SAPALDIA_Gabriel SHIP-1 SHIP-TREND-0 SHIP-TREND-0_B2 Split Twins_UK UKB_AFR UKB_AMR UKB_EAS UKB_EUR UKB_SAS UKHLS VIKING Vis YFS	0.636222	0.900988	0.252786	0.658337	0.495575	581873	581871	577203	420633	0.5684	0.5633	0.6091	0.6351	0.006	0.0005	0.0015	0.0156	0.001	0.0011	0.0001	0.0032	7.366e-10	0.6398	7.756e-27	1.168e-06	PPP1R3B(PoPs,nearest), ALG1L13P(eQTL), CLDN23(eQTL), CTA-398F10.2(eQTL), ERI1(eQTL), MFHAS1(eQTL), MSRA(eQTL), RP11-10A14.5(eQTL), RP11-62H7.2(eQTL)
LOC101929128	rs453301	FALSE			8_9030387_G_T	8	9030387	PEF		T	G	0.502	0.498	6.692	2.21e-11	++++++++-+-+++++++-+++	ALSPAC ARIC_AA B58C EPIC FinnTwin hunt LBC1936 orcades Raine RS1 RS2 RS3 SHIP-1 SHIP-TREND-0 SHIP-TREND-0_B2 Split UKB_AFR UKB_AMR UKB_EAS UKB_EUR UKB_SAS VIKING	0.505367	0.513927	0.172405	0.568595	0.386282	581886	581884	577216	420633	0.4614	0.4562	0.4847	0.5047	0.0068	0.0036	0.0011	0.0189	0.001	0.0011	0.0001	0.0031	2.509e-12	0.001396	1.011e-15	9.244e-10	ERI1(eQTL,PoPs), ALG1L13P(eQTL), CLDN23(eQTL), CTA-398F10.2(eQTL), LOC101929128(nearest), MFHAS1(eQTL), MSRA(eQTL), RP11-10A14.5(eQTL), RP11-62H7.2(eQTL)
DLC1	rs6983961	FALSE			8_13194007_G_T	8	13194007	FEV1/FVC		T	G	0.5	0.5	6.845	7.64e-12	++++-+----+-+++++++-+-+++-+-+++++--+++-+-+++--+++	ALHS ALSPAC ARIC_AA ARIC_EA B58C BHS CHSAA CHSEA CKB EPIC EXCEED FHS FinnTwin GS20K H2000 HCHS hunt KORA_F4 KORA_S3 Korcula LBC1936 MESA_AFA_new MESA_CAU_new MESA_HIS_new NEO NFBC66 NFBC86 orcades PIVUS Raine RS1 RS2 RS3 SAPALDIA_Edinburgh SAPALDIA_Gabriel SHIP-1 SHIP-TREND-0 SHIP-TREND-0_B2 Split Twins_UK UKB_AFR UKB_AMR UKB_EAS UKB_EUR UKB_SAS UKHLS VIKING Vis YFS	0.50463	0.654335	0.477658	0.454711	0.435165	581881	581879	577211	420633	0.4965	0.4966	0.5004	0.5072	0.0047	0.002	0.001	0.0102	0.0009	0.0011	0.0001	0.0031	2.597e-07	0.0621	4.371e-13	0.000876	DLC1(PoPs,nearest), TRMT9B(WES)
MICU3	rs2285261	FALSE			8_16922013_A_C	8	16922013	FEV1/FVC		A	C	0.398	0.398	8.911	5.04e-19	-+-+-+-+++++-++++--+--+-+++--++++----++++---+-+---	ALHS ALSPAC ARIC_AA ARIC_EA B58C BHS CHSAA CHSEA CKB EPIC EXCEED FHS FinnTwin GS20K H2000 HCHS hunt KORA_F4 KORA_S3 Korcula LBC1936 MESA_AFA_new MESA_CAU_new MESA_HIS_new NEO NFBC66 NFBC86 orcades PIVUS QBB Raine RS1 RS2 RS3 SAPALDIA_Edinburgh SAPALDIA_Gabriel SHIP-1 SHIP-TREND-0 SHIP-TREND-0_B2 Split Twins_UK UKB_AFR UKB_AMR UKB_EAS UKB_EUR UKB_SAS UKHLS VIKING Vis YFS	0.381386	0.589315	0.432379	0.450498	0.499642	581888	581886	577218	420633	0.4019	0.4027	0.395	0.3855	0.0005	-0.0037	0.0012	0.008	0.0009	0.0011	0.0001	0.0031	0.5956	0.0005442	4.859e-18	0.01086	MICU3(PoPs,nearest)
FGL1	rs2073565	FALSE			8_17743649_C_T	8	17743649	FEV1/FVC		T	C	0.356	0.356	-7.312	2.64e-13	-+-----+--++------+--+-+--------+++---+--+----+-+	ALHS ALSPAC ARIC_AA ARIC_EA B58C BHS CHSAA CHSEA CKB EPIC EXCEED FHS FinnTwin GS20K H2000 HCHS hunt KORA_F4 KORA_S3 Korcula LBC1936 MESA_AFA_new MESA_CAU_new MESA_HIS_new NEO NFBC66 NFBC86 orcades PIVUS Raine RS1 RS2 RS3 SAPALDIA_Edinburgh SAPALDIA_Gabriel SHIP-1 SHIP-TREND-0 SHIP-TREND-0_B2 Split Twins_UK UKB_AFR UKB_AMR UKB_EAS UKB_EUR UKB_SAS UKHLS VIKING Vis YFS	0.309723	0.820939	0.562707	0.425006	0.58801	581888	581886	577218	420633	0.3868	0.3893	0.3504	0.3344	0	0.0038	-0.001	-0.0066	0.001	0.0011	0.0001	0.0033	0.9897	0.0008664	2.898e-12	0.04624	PCM1(eQTL,PoPs), ASAH1(eQTL), FGL1(nearest), RP11-156K13.1(eQTL), RP11-806O11.1(eQTL)
CCAR2	rs34269854	FALSE			8_22465160_C_G	8	22465160	FVC		C	G	0.32	0.32	-5.913	3.36e-09	---+++-+--+--++---+-+--+----------+--++++---+-+-+	ALHS ALSPAC ARIC_AA ARIC_EA B58C BHS CHSAA CHSEA CKB EPIC EXCEED FHS FinnTwin GS20K H2000 HCHS hunt KORA_F4 KORA_S3 Korcula LBC1936 MESA_AFA_new MESA_CAU_new MESA_HIS_new NEO NFBC66 NFBC86 orcades PIVUS Raine RS1 RS2 RS3 SAPALDIA_Edinburgh SAPALDIA_Gabriel SHIP-1 SHIP-TREND-0 SHIP-TREND-0_B2 Split Twins_UK UKB_AFR UKB_AMR UKB_EAS UKB_EUR UKB_SAS UKHLS VIKING Vis YFS	0.326579	0.359793	0.253875	0.314496	0.374109	581887	581885	577217	420633	0.3153	0.3141	0.3222	0.3232	-0.003	-0.0063	0.0007	-0.0015	0.001	0.0011	0.0001	0.0033	0.002429	3.812e-08	1.503e-06	0.6385	CCAR2(nearest), SFTPC(rare_disease), SORBS3(PoPs)
ADAM28	rs62501195	FALSE			8_24041988_A_C	8	24041988	FVC		A	C	0.823	0.177	-6.362	2e-10	-++---++--+--+++---++-+-+-+-+---++++-----------++-	ALHS ALSPAC ARIC_AA ARIC_EA B58C BHS CHSAA CHSEA CKB EPIC EXCEED FHS FinnTwin GS20K H2000 HCHS hunt KORA_F4 KORA_S3 Korcula LBC1936 MESA_AFA_new MESA_CAU_new MESA_HIS_new NEO NFBC66 NFBC86 orcades PIVUS QBB Raine RS1 RS2 RS3 SAPALDIA_Edinburgh SAPALDIA_Gabriel SHIP-1 SHIP-TREND-0 SHIP-TREND-0_B2 Split Twins_UK UKB_AFR UKB_AMR UKB_EAS UKB_EUR UKB_SAS UKHLS VIKING Vis YFS	0.828668	0.9854	0.804147	0.864105	0.89166	581851	581849	577181	420633	0.8184	0.8173	0.8232	0.8297	-0.006	-0.0087	0.0001	-0.0214	0.0012	0.0014	0.0002	0.0041	1.125e-06	9.376e-10	0.6387	2.478e-07	ADAM28(nearest), ADAMDEC1(PoPs)
FGFR1	rs881299	FALSE			8_38332249_C_T	8	38332249	FEV1/FVC		T	C	0.597	0.403	-6.227	4.75e-10	+-+-+--------+----+-++-++-++--+-+-----++--0+---+-+	ALHS ALSPAC ARIC_AA ARIC_EA B58C BHS CHSAA CHSEA CKB EPIC EXCEED FHS FinnTwin GS20K H2000 HCHS hunt KORA_F4 KORA_S3 Korcula LBC1936 MESA_AFA_new MESA_CAU_new MESA_HIS_new NEO NFBC66 NFBC86 orcades PIVUS QBB Raine RS1 RS2 RS3 SAPALDIA_Edinburgh SAPALDIA_Gabriel SHIP-1 SHIP-TREND-0 SHIP-TREND-0_B2 Split Twins_UK UKB_AFR UKB_AMR UKB_EAS UKB_EUR UKB_SAS UKHLS VIKING Vis YFS	0.588294	0.736519	0.599297	0.620719	0.470651	581886	581884	577216	420633	0.5971	0.598	0.5934	0.596	0.0005	0.0038	-0.0008	-0.0029	0.0009	0.0011	0.0001	0.0031	0.559	0.0004907	1.919e-09	0.346	FGFR1(eQTL,rare_disease,PoPs,nearest), BAG4(eQTL), DDHD2(eQTL), LETM2(eQTL), RP11-350N15.4(eQTL)
UBE2V2	rs13270953	FALSE			8_48938228_C_T	8	48938228	FEV1		T	C	0.242	0.242	-6.22	4.98e-10	-----+-+----+-+--++----+-+-+-?-+---+-+----++-----+	ALHS ALSPAC ARIC_AA ARIC_EA B58C BHS CHSAA CHSEA CKB EPIC EXCEED FHS FinnTwin GS20K H2000 HCHS hunt KORA_F4 KORA_S3 Korcula LBC1936 MESA_AFA_new MESA_CAU_new MESA_HIS_new NEO NFBC66 NFBC86 orcades PIVUS QBB Raine RS1 RS2 RS3 SAPALDIA_Edinburgh SAPALDIA_Gabriel SHIP-1 SHIP-TREND-0 SHIP-TREND-0_B2 Split Twins_UK UKB_AFR UKB_AMR UKB_EAS UKB_EUR UKB_SAS UKHLS VIKING Vis YFS	0.256813	0.0851932	0.159847	0.39181	0.434339	570303	570301	565633	420633	0.2459	0.2441	0.2551	0.2554	-0.0061	-0.0072	0	-0.0132	0.0011	0.0013	0.0002	0.0035	1.591e-08	1.256e-08	0.7746	0.0001964	PRKDC(rare_disease,PoPs), MCM4(rare_disease), UBE2V2(nearest)
LOC101929268	rs10089933	FALSE			8_49391483_C_T	8	49391483	FVC		T	C	0.742	0.258	7.144	9.09e-13	+--++++++--+-+++++-++--++++++?+++--+++--+++++-++++	ALHS ALSPAC ARIC_AA ARIC_EA B58C BHS CHSAA CHSEA CKB EPIC EXCEED FHS FinnTwin GS20K H2000 HCHS hunt KORA_F4 KORA_S3 Korcula LBC1936 MESA_AFA_new MESA_CAU_new MESA_HIS_new NEO NFBC66 NFBC86 orcades PIVUS QBB Raine RS1 RS2 RS3 SAPALDIA_Edinburgh SAPALDIA_Gabriel SHIP-1 SHIP-TREND-0 SHIP-TREND-0_B2 Split Twins_UK UKB_AFR UKB_AMR UKB_EAS UKB_EUR UKB_SAS UKHLS VIKING Vis YFS	0.757672	0.512772	0.705827	0.621673	0.602979	570341	570339	565671	420633	0.7363	0.7349	0.744	0.7511	0.0041	0.0077	-0.0006	0.0032	0.001	0.0012	0.0002	0.0035	9.187e-05	1.715e-10	4.489e-05	0.3676	CEBPD(eQTL), EFCAB1(PoPs), ENSG00000279881(eQTL), LOC101929268(nearest), RP11-770E5.1(eQTL)
PCMTD1	rs10101163	FALSE			8_52822650_A_G	8	52822650	PEF		A	G	0.734	0.266	-6.012	1.83e-09	+++----++--+--+-+-----	ALSPAC ARIC_AA B58C EPIC FinnTwin hunt LBC1936 orcades Raine RS1 RS2 RS3 SHIP-1 SHIP-TREND-0 SHIP-TREND-0_B2 Split UKB_AFR UKB_AMR UKB_EAS UKB_EUR UKB_SAS VIKING	0.738771	0.601089	0.562178	0.735837	0.709137	581888	581886	577218	420633	0.6821	0.6797	0.7137	0.736	-0.0032	-0.002	-0.0004	-0.0193	0.001	0.0012	0.0001	0.0035	0.00124	0.08823	0.002351	2.351e-08	PCMTD1(PoPs,nearest)
CHCHD7	rs35398666	FALSE			8_57148383_A_G	8	57148383	FVC	FEV1,FVC	A	G	0.871	0.129	7.806	5.9e-15	+--+++++++-+-+++++++++++++++-+---+---++---++++++++	ALHS ALSPAC ARIC_AA ARIC_EA B58C BHS CHSAA CHSEA CKB EPIC EXCEED FHS FinnTwin GS20K H2000 HCHS hunt KORA_F4 KORA_S3 Korcula LBC1936 MESA_AFA_new MESA_CAU_new MESA_HIS_new NEO NFBC66 NFBC86 orcades PIVUS QBB Raine RS1 RS2 RS3 SAPALDIA_Edinburgh SAPALDIA_Gabriel SHIP-1 SHIP-TREND-0 SHIP-TREND-0_B2 Split Twins_UK UKB_AFR UKB_AMR UKB_EAS UKB_EUR UKB_SAS UKHLS VIKING Vis YFS	0.868189	0.591796	0.910465	0.813517	0.848362	581862	581860	577192	420633	0.8621	0.8631	0.8592	0.8596	0.0079	0.0112	-0.0002	0.0014	0.0014	0.0016	0.0002	0.0045	8.181e-09	2.399e-12	0.2639	0.751	CHCHD7(mouse_KO,nearest), PLAG1(PoPs)
LINC01289	rs4737183	TRUE	rs1425794	31911640	8_64720693_A_G	8	64720693	FVC	FEV1,FVC	A	G	0.484	0.484	-8.307	9.8e-17	-----------+-------+-+-+-+--+++-----+----+-+-+-+--	ALHS ALSPAC ARIC_AA ARIC_EA B58C BHS CHSAA CHSEA CKB EPIC EXCEED FHS FinnTwin GS20K H2000 HCHS hunt KORA_F4 KORA_S3 Korcula LBC1936 MESA_AFA_new MESA_CAU_new MESA_HIS_new NEO NFBC66 NFBC86 orcades PIVUS QBB Raine RS1 RS2 RS3 SAPALDIA_Edinburgh SAPALDIA_Gabriel SHIP-1 SHIP-TREND-0 SHIP-TREND-0_B2 Split Twins_UK UKB_AFR UKB_AMR UKB_EAS UKB_EUR UKB_SAS UKHLS VIKING Vis YFS	0.529436	0.126059	0.284321	0.55246	0.415213	581888	581886	577218	420633	0.4823	0.4796	0.5075	0.5276	-0.006	-0.0087	0.0001	-0.0074	0.0009	0.0011	0.0001	0.0031	1.063e-10	1.514e-15	0.6448	0.01565	LINC01289(nearest)
C8orf34	rs974335	TRUE	rs17387279	31911640	8_69577326_A_G	8	69577326	FVC	FEV1,FVC	A	G	0.849	0.151	7.646	2.08e-14	--++-++-++-+++-++-+------+-+-++-+++++-+++-++++++--	ALHS ALSPAC ARIC_AA ARIC_EA B58C BHS CHSAA CHSEA CKB EPIC EXCEED FHS FinnTwin GS20K H2000 HCHS hunt KORA_F4 KORA_S3 Korcula LBC1936 MESA_AFA_new MESA_CAU_new MESA_HIS_new NEO NFBC66 NFBC86 orcades PIVUS QBB Raine RS1 RS2 RS3 SAPALDIA_Edinburgh SAPALDIA_Gabriel SHIP-1 SHIP-TREND-0 SHIP-TREND-0_B2 Split Twins_UK UKB_AFR UKB_AMR UKB_EAS UKB_EUR UKB_SAS UKHLS VIKING Vis YFS	0.818063	0.932434	0.995558	0.815989	0.857102	581888	581886	577218	420633	0.8237	0.8242	0.8225	0.8228	0.0078	0.0107	-0.0002	0.0165	0.0013	0.0016	0.0002	0.004	2.756e-09	5.414e-12	0.2499	3.715e-05	C8orf34(PoPs,nearest)
LOC100505739	rs1441207	TRUE	rs7465401	30804560	8_70367191_C_G	8	70367191	FEV1	FEV1,FF	C	G	0.294	0.294	8.72	2.78e-18	++++++-++++++++++-+--+--++-+-+++-+--+++--++++-++++	ALHS ALSPAC ARIC_AA ARIC_EA B58C BHS CHSAA CHSEA CKB EPIC EXCEED FHS FinnTwin GS20K H2000 HCHS hunt KORA_F4 KORA_S3 Korcula LBC1936 MESA_AFA_new MESA_CAU_new MESA_HIS_new NEO NFBC66 NFBC86 orcades PIVUS QBB Raine RS1 RS2 RS3 SAPALDIA_Edinburgh SAPALDIA_Gabriel SHIP-1 SHIP-TREND-0 SHIP-TREND-0_B2 Split Twins_UK UKB_AFR UKB_AMR UKB_EAS UKB_EUR UKB_SAS UKHLS VIKING Vis YFS	0.257115	0.261557	0.43808	0.342135	0.311293	581886	581884	577216	420633	0.313	0.3149	0.2836	0.2614	0.0086	0.0067	0.001	0.019	0.001	0.0012	0.0001	0.0035	5.443e-18	1.226e-08	4.72e-12	4.431e-08	LOC100505739(nearest), SULF1(PoPs)
SULF1	rs2244817	FALSE			8_70376825_C_T	8	70376825	FEV1	FEV1,FF	T	C	0.564	0.436	6.99	2.75e-12	++-++++-+-++-+++++-+-+-++++-++----++++-+++-++++++	ALHS ALSPAC ARIC_AA ARIC_EA B58C BHS CHSAA CHSEA CKB EPIC EXCEED FHS FinnTwin GS20K H2000 HCHS hunt KORA_F4 KORA_S3 Korcula LBC1936 MESA_AFA_new MESA_CAU_new MESA_HIS_new NEO NFBC66 NFBC86 orcades PIVUS Raine RS1 RS2 RS3 SAPALDIA_Edinburgh SAPALDIA_Gabriel SHIP-1 SHIP-TREND-0 SHIP-TREND-0_B2 Split Twins_UK UKB_AFR UKB_AMR UKB_EAS UKB_EUR UKB_SAS UKHLS VIKING Vis YFS	0.597976	0.254985	0.401021	0.603319	0.639122	581888	581886	577218	420633	0.5509	0.5451	0.5786	0.5953	0.0063	0.0054	0.0007	0.0074	0.0009	0.0011	0.0001	0.0032	2.297e-11	9.417e-07	3.429e-07	0.01975	SULF1(PoPs,nearest)
STAU2	rs4738376	FALSE			8_74409852_A_G	8	74409852	PEF		A	G	0.859	0.141	5.912	3.37e-09	+-+--+-++++--+-+++++++	ALSPAC ARIC_AA B58C EPIC FinnTwin hunt LBC1936 orcades Raine RS1 RS2 RS3 SHIP-1 SHIP-TREND-0 SHIP-TREND-0_B2 Split UKB_AFR UKB_AMR UKB_EAS UKB_EUR UKB_SAS VIKING	0.869073	0.584002	0.485897	0.848486	0.632245	581059	581886	577218	420633	0.7234	0.7119	0.7942	0.8488	0.0033	0.0028	0.0002	0.0285	0.0012	0.0014	0.0002	0.0044	0.00442	0.03971	0.2141	1.104e-10	RDH10(PoPs), STAU2(nearest)
CA2	rs703	FALSE			8_86389403_C_T	8	86389403	FVC		T	C	0.41	0.41	6.679	2.41e-11	-++++--++-+++++-++-++++-+-+-+++--+-+-++--++-+-++++	ALHS ALSPAC ARIC_AA ARIC_EA B58C BHS CHSAA CHSEA CKB EPIC EXCEED FHS FinnTwin GS20K H2000 HCHS hunt KORA_F4 KORA_S3 Korcula LBC1936 MESA_AFA_new MESA_CAU_new MESA_HIS_new NEO NFBC66 NFBC86 orcades PIVUS QBB Raine RS1 RS2 RS3 SAPALDIA_Edinburgh SAPALDIA_Gabriel SHIP-1 SHIP-TREND-0 SHIP-TREND-0_B2 Split Twins_UK UKB_AFR UKB_AMR UKB_EAS UKB_EUR UKB_SAS UKHLS VIKING Vis YFS	0.396909	0.273496	0.543461	0.424098	0.563338	581058	581885	577217	420633	0.4173	0.4198	0.4031	0.4031	0.005	0.0073	-0.0001	0.0005	0.0009	0.0011	0.0001	0.0031	6.507e-08	7.561e-12	0.2937	0.8701	CA1(PoPs), CA2(nearest), RP11-317J10.2(eQTL)
SDC2	rs2439514	FALSE			8_97502460_C_G	8	97502460	FEV1/FVC		C	G	0.306	0.306	-7.492	6.77e-14	+---------+--------++-------+--+-+-----+-------+++	ALHS ALSPAC ARIC_AA ARIC_EA B58C BHS CHSAA CHSEA CKB EPIC EXCEED FHS FinnTwin GS20K H2000 HCHS hunt KORA_F4 KORA_S3 Korcula LBC1936 MESA_AFA_new MESA_CAU_new MESA_HIS_new NEO NFBC66 NFBC86 orcades PIVUS QBB Raine RS1 RS2 RS3 SAPALDIA_Edinburgh SAPALDIA_Gabriel SHIP-1 SHIP-TREND-0 SHIP-TREND-0_B2 Split Twins_UK UKB_AFR UKB_AMR UKB_EAS UKB_EUR UKB_SAS UKHLS VIKING Vis YFS	0.310863	0.221094	0.306556	0.309662	0.212083	581055	581882	577214	420633	0.3072	0.3073	0.3069	0.3145	-0.0027	0.0008	-0.001	-0.0083	0.001	0.0011	0.0001	0.0033	0.006087	0.5116	9.693e-13	0.01262	SDC2(eQTL,PoPs,nearest)
NCALD	rs659398	TRUE	rs659398	31911640	8_103131300_C_T	8	103131300	FEV1/FVC	PEF,FEV1,FF	T	C	0.293	0.293	-9.959	2.3e-23	-+--+-----+-+---------+---------+----+------------	ALHS ALSPAC ARIC_AA ARIC_EA B58C BHS CHSAA CHSEA CKB EPIC EXCEED FHS FinnTwin GS20K H2000 HCHS hunt KORA_F4 KORA_S3 Korcula LBC1936 MESA_AFA_new MESA_CAU_new MESA_HIS_new NEO NFBC66 NFBC86 orcades PIVUS QBB Raine RS1 RS2 RS3 SAPALDIA_Edinburgh SAPALDIA_Gabriel SHIP-1 SHIP-TREND-0 SHIP-TREND-0_B2 Split Twins_UK UKB_AFR UKB_AMR UKB_EAS UKB_EUR UKB_SAS UKHLS VIKING Vis YFS	0.269381	0.272585	0.36807	0.241127	0.313568	581051	581878	577210	420633	0.3022	0.306	0.2856	0.2799	-0.0074	-0.0032	-0.0015	-0.0273	0.001	0.0012	0.0001	0.0035	1.488e-13	0.006198	8.69e-24	2.86e-15	NCALD(PoPs,nearest)
EIF3E	rs639609	FALSE			8_109255732_C_T	8	109255732	FEV1		T	C	0.543	0.457	-6.53	6.6e-11	----------+--+-?---++?+?-----?+-+--+---++-+--+--+-	ALHS ALSPAC ARIC_AA ARIC_EA B58C BHS CHSAA CHSEA CKB EPIC EXCEED FHS FinnTwin GS20K H2000 HCHS hunt KORA_F4 KORA_S3 Korcula LBC1936 MESA_AFA_new MESA_CAU_new MESA_HIS_new NEO NFBC66 NFBC86 orcades PIVUS QBB Raine RS1 RS2 RS3 SAPALDIA_Edinburgh SAPALDIA_Gabriel SHIP-1 SHIP-TREND-0 SHIP-TREND-0_B2 Split Twins_UK UKB_AFR UKB_AMR UKB_EAS UKB_EUR UKB_SAS UKHLS VIKING Vis YFS	0.548842	0.129126	0.487494	0.549604	0.484665	556735	557562	552894	407856	0.5443	0.544	0.5463	0.5414	-0.0058	-0.0043	-0.0008	-0.01	0.0009	0.0011	0.0001	0.0031	4.189e-10	5.606e-05	8.596e-10	0.001396	RSPO2(rare_disease,PoPs), EIF3E(nearest)
EMC2	rs1955032	FALSE			8_109426294_G_T	8	109426294	FEV1/FVC		T	G	0.355	0.355	8.517	1.64e-17	+--+0++++-++++-++++++----+++-?++-+---++-++-++-++++	ALHS ALSPAC ARIC_AA ARIC_EA B58C BHS CHSAA CHSEA CKB EPIC EXCEED FHS FinnTwin GS20K H2000 HCHS hunt KORA_F4 KORA_S3 Korcula LBC1936 MESA_AFA_new MESA_CAU_new MESA_HIS_new NEO NFBC66 NFBC86 orcades PIVUS QBB Raine RS1 RS2 RS3 SAPALDIA_Edinburgh SAPALDIA_Gabriel SHIP-1 SHIP-TREND-0 SHIP-TREND-0_B2 Split Twins_UK UKB_AFR UKB_AMR UKB_EAS UKB_EUR UKB_SAS UKHLS VIKING Vis YFS	0.352459	0.126171	0.453001	0.305821	0.212404	569511	570338	565670	420633	0.3594	0.3608	0.3529	0.3566	0.005	0.0025	0.0011	0.0106	0.001	0.0011	0.0001	0.0032	1.429e-07	0.02531	2.4e-15	0.0009826	EIF3E(PoPs), EMC2(nearest), RSPO2(rare_disease)
EIF3H	rs28445777	FALSE			8_117522638_A_T	8	117522638	FEV1		A	T	0.669	0.331	-5.989	2.11e-09	---+--+--+--------+++-+--+----+-+++-----+-+--+--+-	ALHS ALSPAC ARIC_AA ARIC_EA B58C BHS CHSAA CHSEA CKB EPIC EXCEED FHS FinnTwin GS20K H2000 HCHS hunt KORA_F4 KORA_S3 Korcula LBC1936 MESA_AFA_new MESA_CAU_new MESA_HIS_new NEO NFBC66 NFBC86 orcades PIVUS QBB Raine RS1 RS2 RS3 SAPALDIA_Edinburgh SAPALDIA_Gabriel SHIP-1 SHIP-TREND-0 SHIP-TREND-0_B2 Split Twins_UK UKB_AFR UKB_AMR UKB_EAS UKB_EUR UKB_SAS UKHLS VIKING Vis YFS	0.622943	0.96129	0.849718	0.723036	0.724634	581058	581885	577217	420633	0.6548	0.6566	0.6368	0.6327	-0.0058	-0.0066	-0.0002	-0.0134	0.001	0.0012	0.0001	0.0032	5.589e-09	1.654e-08	0.2127	2.609e-05	EIF3H(PoPs,nearest)
TRIB1	rs1031498	FALSE			8_126591354_C_G	8	126591354	FEV1/FVC		C	G	0.531	0.469	6.44	1.2e-10	+++-++--++++-+-++-++---+++++--++++++----+++++-++++	ALHS ALSPAC ARIC_AA ARIC_EA B58C BHS CHSAA CHSEA CKB EPIC EXCEED FHS FinnTwin GS20K H2000 HCHS hunt KORA_F4 KORA_S3 Korcula LBC1936 MESA_AFA_new MESA_CAU_new MESA_HIS_new NEO NFBC66 NFBC86 orcades PIVUS QBB Raine RS1 RS2 RS3 SAPALDIA_Edinburgh SAPALDIA_Gabriel SHIP-1 SHIP-TREND-0 SHIP-TREND-0_B2 Split Twins_UK UKB_AFR UKB_AMR UKB_EAS UKB_EUR UKB_SAS UKHLS VIKING Vis YFS	0.535155	0.237607	0.537521	0.555704	0.46037	581059	581886	577218	420633	0.5308	0.5304	0.5329	0.537	0.0006	-0.0024	0.0008	0.0018	0.0009	0.0011	0.0001	0.0031	0.4859	0.02495	1.691e-08	0.5675	NSMCE2(PoPs), TRIB1(nearest)
LINC00977	rs6470697	FALSE			8_130130604_A_C	8	130130604	FEV1	FEV1,FVC,FF	A	C	0.859	0.141	-9.361	7.93e-21	+-----+---+-++-----+----+-+-+--------+----+----+++	ALHS ALSPAC ARIC_AA ARIC_EA B58C BHS CHSAA CHSEA CKB EPIC EXCEED FHS FinnTwin GS20K H2000 HCHS hunt KORA_F4 KORA_S3 Korcula LBC1936 MESA_AFA_new MESA_CAU_new MESA_HIS_new NEO NFBC66 NFBC86 orcades PIVUS QBB Raine RS1 RS2 RS3 SAPALDIA_Edinburgh SAPALDIA_Gabriel SHIP-1 SHIP-TREND-0 SHIP-TREND-0_B2 Split Twins_UK UKB_AFR UKB_AMR UKB_EAS UKB_EUR UKB_SAS UKHLS VIKING Vis YFS	0.901295	0.496723	0.693774	0.834256	0.781082	581059	581886	577218	420633	0.808	0.801	0.8506	0.8779	-0.0111	-0.0095	-0.0013	-0.0277	0.0013	0.0015	0.0002	0.005	3.551e-17	3.913e-10	6.301e-10	2.375e-08	LINC00977(nearest)
GSDMC	rs7835737	FALSE			8_130649512_C_T	8	130649512	PEF		T	C	0.579	0.421	-8.796	1.41e-18	----+-+----+-+--------	ALSPAC ARIC_AA B58C EPIC FinnTwin hunt LBC1936 orcades Raine RS1 RS2 RS3 SHIP-1 SHIP-TREND-0 SHIP-TREND-0_B2 Split UKB_AFR UKB_AMR UKB_EAS UKB_EUR UKB_SAS VIKING	0.577865	0.818286	0.44361	0.546435	0.547258	581055	581882	577214	420633	0.5465	0.5421	0.5652	0.5817	-0.0011	-0.0004	-0.0002	-0.0274	0.0009	0.0011	0.0001	0.0031	0.2217	0.6827	0.1425	9.357e-19	FAM49B(PoPs), GSDMC(nearest)
GSDMC	8:130719436_GAAAA_G	FALSE			8_130719436_G_GAAAA	8	130719436	FVC		G	GAAAA	0.317	0.317	-5.864	4.52e-09	??-?????-???????????????????????????????-----????	ALHS ALSPAC ARIC_AA ARIC_EA B58C BHS CHSAA CHSEA CKB EPIC EXCEED FHS FinnTwin GS20K H2000 HCHS hunt KORA_F4 KORA_S3 Korcula LBC1936 MESA_AFA_new MESA_CAU_new MESA_HIS_new NEO NFBC66 NFBC86 orcades PIVUS Raine RS1 RS2 RS3 SAPALDIA_Edinburgh SAPALDIA_Gabriel SHIP-1 SHIP-TREND-0 SHIP-TREND-0_B2 Split Twins_UK UKB_AFR UKB_AMR UKB_EAS UKB_EUR UKB_SAS UKHLS VIKING Vis YFS	0.225688	0.885365	0.766106	0.212138	0.436566	420050	420050	420050	336335	0.3768	0.3971	0.2841	0.2383	-0.0055	-0.009	0.0005	-0.0129	0.0013	0.0015	0.0002	0.0043	2.117e-05	1.99e-09	0.006767	0.002774	FAM49B(PoPs), GSDMC(nearest)
BOP1	rs7838717	TRUE	rs7838717	30804560	8_145504343_C_T	8	145504343	FVC	FEV1,FVC	T	C	0.407	0.407	-10.704	9.79e-27	------+----------+--------+--+-+---+---+-+-+-+----	ALHS ALSPAC ARIC_AA ARIC_EA B58C BHS CHSAA CHSEA CKB EPIC EXCEED FHS FinnTwin GS20K H2000 HCHS hunt KORA_F4 KORA_S3 Korcula LBC1936 MESA_AFA_new MESA_CAU_new MESA_HIS_new NEO NFBC66 NFBC86 orcades PIVUS QBB Raine RS1 RS2 RS3 SAPALDIA_Edinburgh SAPALDIA_Gabriel SHIP-1 SHIP-TREND-0 SHIP-TREND-0_B2 Split Twins_UK UKB_AFR UKB_AMR UKB_EAS UKB_EUR UKB_SAS UKHLS VIKING Vis YFS	0.365373	0.071969	0.620868	0.415213	0.339209	579831	580658	575990	420633	0.4163	0.4242	0.3801	0.3705	-0.0097	-0.0118	-0.0002	-0.0079	0.001	0.0011	0.0001	0.0032	1.516e-23	3.162e-25	0.2162	0.01492	AF186192.5(eQTL), BOP1(nearest), CTD-2517M22.14(eQTL), CYHR1(eQTL), DGAT1(PoPs), GPT(eQTL), KIFC2(eQTL), PPP1R16A(eQTL)
[truncated: 472 more rows]

## Sheet: Supp Table 7
Supplementary Table 7 - MR-MEGA ancestry-adjusted meta-regression results and heterogeneity due to ancestry
[truncated: 962 more rows]

[truncated: 19 more sheets: Supp Table 8, Supp Table 10, Supp Table 13, Supp Table 14, Supp Table 15, Supp Table 17, Supp Table 18, Supp Table 19, Supp Table 24, Supp Table 25, Supp Table 26, Supp Table 27, Supp Table 28, Supp Table 29, Supp Table 30, Supp Table 31, Supp Table 32, Supp Table 33, Sheet1]
